# Supplementary material for: Fluorescent organometallic dyads and triads: establishing spatial relationships
Source: Royal Society of Chemistry journal article supplement (doi:10.1039/d2sc04869h), 2022-12-06
Supplement: d2sc04869h1.pdf [file d2sc04869h1.pdf]

# Supporting information

## Table of Contents

|                                                                            |            |
|----------------------------------------------------------------------------|------------|
| <b>1. General Information .....</b>                                        | <b>2</b>   |
| <b>2. Synthesis and Experimental Procedures .....</b>                      | <b>3</b>   |
| <i>General Procedure A. Synthesis of Bodipy derivatives.....</i>           | <i>4</i>   |
| <i>General Procedure B. Synthesis of alkoxy substituted products. ....</i> | <i>4</i>   |
| <i>General Procedure C. Synthesis of NHC-metal complexes.....</i>          | <i>4</i>   |
| <i>General Procedure D. Synthesis of 8-Amino Bodipy derivatives .....</i>  | <i>5</i>   |
| <i>Synthesis of individual compounds.....</i>                              | <i>6</i>   |
| <b>3. UV/Vis and Fluorescence Data.....</b>                                | <b>40</b>  |
| <i>Evaluation of red-green FRET .....</i>                                  | <i>40</i>  |
| <i>Monitoring ion pairing using red-green FRET .....</i>                   | <i>47</i>  |
| <i>Evaluation of the blue-green-red triad.....</i>                         | <i>53</i>  |
| <i>Fluorescence and absorbance spectra for synthesized complexes.....</i>  | <i>63</i>  |
| <i>Fluorescence quantum yield.....</i>                                     | <i>67</i>  |
| <b>4. NMR Spectra.....</b>                                                 | <b>68</b>  |
| <i>Red Bodipy derivatives.....</i>                                         | <i>68</i>  |
| <i>Bodipy-tagged metal complexes.....</i>                                  | <i>73</i>  |
| <i>Blue Bodipy derivatives .....</i>                                       | <i>91</i>  |
| <i>Blue-green-red triad.....</i>                                           | <i>103</i> |
| <i>IPrAuNTf<sub>2</sub> + DBU interaction.....</i>                         | <i>106</i> |
| <b>5. High-resolution mass spectrometry .....</b>                          | <b>109</b> |

## 1. General Information

All solvents were dried and used after distillation: dichloromethane and 1,2-dichloroethane dried over  $\text{CaH}_2$ ; THF dried over sodium, dimethylacetamide distilled over  $\text{CaH}_2$ ; methanol distilled over  $\text{K}_2\text{CO}_3$ ; acetone distilled over  $\text{CaO}$ . All mentioned solvents were stored over molecular sieves  $4\text{\AA}$  after distillation. All reagents were used as purchased for the reactions without further purification. All reactions involving transition metal complexes were conducted in oven-dried glassware. Reactions were performed in Schlenk flasks under a positive pressure of argon or nitrogen. The flasks were fitted with rubber septa and gas-tight syringes with stainless steel needles or double-cannula were used to transfer air- and moisture-sensitive liquids. Column chromatography was performed on silica 60 (Machery-Nagel GmbH & Co.KG, 0.063-0.2 mm) with the indicated eluent mixtures. Filtration processes were performed using filter paper 310 with particle retention 10 – 20  $\mu\text{m}$  or SCHOTT-DURAN glass filter Por.4. High vacuum denotes pressure range 0.1 –  $10^{-3}$  mbar.  $^1\text{H}$ ,  $^{13}\text{C}$ , and  $^{19}\text{F}$  NMR spectra were recorded on a Bruker DRX 500 or Bruker ARX 300 spectrometer. The chemical shifts are given in parts per million (ppm) on the delta scale ( $\delta$ ) and are referenced to tetramethylsilane ( $^1\text{H}$ ,  $^{13}\text{C}$  NMR = 0.0 ppm). Abbreviations for NMR data: s = singlet; d = doublet; t = triplet; q = quartet; sep = septet; m = multiplet; bs = broad signal. Mass spectra were recorded on the Finnigan MAT95 spectrometer using electrospray ionization (ESI). UV-Vis spectra were recorded on Analytik Jena Specord 600 UV-Vis spectrometer. Emission spectra were recorded on corrected J&M TIDAS S700/CCD UV/NIR 2098 spectrometer combined with J&M TIDAS LSM monochromator with 75 W Xenon light source. The following compounds were synthesized according to known literature procedures: 9-(2-Bromophenyl)-9H-fluoren-9-ol<sup>[1]</sup>,  $[\text{Ag}(\text{bdpSO}_3)]$ <sup>[2]</sup>, 8-Chloro Bodipy<sup>[3]</sup>, 8-SMe Bodipy<sup>[4]</sup>, 11<sup>[5]</sup>, 13<sup>[5]</sup>,  $[\text{AuCl}(\text{NHC\_green})]$ <sup>[5]</sup>,  $\mathbf{9}\cdot\text{HBr}$ <sup>[5]</sup>,  $[\text{AuCl}(\mathbf{9})]$ <sup>[5]</sup>,  $[\text{Au}(\text{NTf}_2)(\text{NHC\_green})]$ <sup>[5]</sup>.

## 2. Synthesis and Experimental Procedures

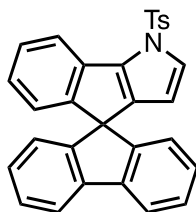

**Synthesis of pyrrole 2.** A mixture of 9-(2-bromophenyl)-9H-fluoren-9-ol<sup>[1]</sup> (14.6 g, 27.0 mmol), Pd(OAc)<sub>2</sub> (1.0 g, 4.5 mmol), and K<sub>2</sub>CO<sub>3</sub> (7.8 g, 56.4 mmol) in dry DMF (150 mL) was stirred at 100 °C for 20 h. After the solvent was distilled off under low vacuum, the residue was dissolved in CH<sub>2</sub>Cl<sub>2</sub> (150 mL) and washed with brine (100 mL) and water (150 mL). The organic layer was separated, dried over MgSO<sub>4</sub>, and filtered. Evaporation of the solution in a rotavap gave the product as a brown solid. The crude product was slurried with a mixture of CH<sub>2</sub>Cl<sub>2</sub> and cyclohexane (ca. 20 mL, 1:1), and the resulting precipitate was collected by suction filtration to provide **2** as a white solid (8.7 g, 18.9 mmol, 70%). The characterization data of **2** match with literature data.<sup>[1]</sup>

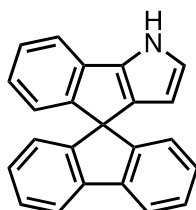

**Synthesis of pyrrole 3.** A mixture of **2** (4.2 g, 9.0 mmol) and Cs<sub>2</sub>CO<sub>3</sub> (9.1 g, 27.8 mmol) in THF/MeOH (3:1, 145 mL) was stirred for 24 h. After evaporation of the solvent, the residue was dissolved in CH<sub>2</sub>Cl<sub>2</sub> (50 mL). The organic layer was washed with H<sub>2</sub>O, dried over MgSO<sub>4</sub>, filtered over a paper filter and evaporated in a rotavap to provide a dark orange solid. Recrystallization from CH<sub>2</sub>Cl<sub>2</sub> and cyclohexane afforded **3** as a white crystalline solid (2.4 g, 7.7 mmol, 85 %). The characterization data of **3** match with literature data.<sup>[1]</sup>

**General Procedure A. Synthesis of Bodipy derivatives.** To a solution of pyrrole **3** (0.33 mmol, 2.0 eq.) and aldehyde (0.16 mmol, 1.0 eq.) in dry CH<sub>2</sub>Cl<sub>2</sub> (3.0 mL) was added a catalytic amount of TFA (1 drop), and the solution was stirred at rt for 15 h under nitrogen atmosphere. The reaction mixture was poured into 5% aq. solution of NaHCO<sub>3</sub> and extracted with CH<sub>2</sub>Cl<sub>2</sub> (3 x 100 mL). The combined organic layers were washed with brine (100 mL), followed by drying of the organic layer over MgSO<sub>4</sub> and filtration over a paper filter. After evaporation of the volatiles in a rotavap, the residue was dissolved in dry CH<sub>2</sub>Cl<sub>2</sub> (3.0 mL) and treated with DDQ (36 mg, 0.16 mmol). After stirring for 1 h, Et<sub>3</sub>N (0.2 mL, 1.4 mmol) and BF<sub>3</sub>·OEt<sub>2</sub> (0.3 mL, 2.4 mmol) were added at 0 °C, and the resulting mixture was stirred at rt for another 15 h at rt. The reaction mixture was poured into 5% aq. solution of NaHCO<sub>3</sub> and extracted with CH<sub>2</sub>Cl<sub>2</sub> (3 x 100 mL). The combined organic layers were washed with brine (100 mL), followed by drying over MgSO<sub>4</sub> and filtration over paper filter. After evaporation of the volatiles in a rotavap under reduced pressure, the crude product was purified by column chromatography. The product may be recrystallized from CH<sub>2</sub>Cl<sub>2</sub> and MeOH.

**General procedure B. Synthesis of alkoxy substituted products.** A mixture of alkyl bromide (0.3 mmol, 1.5 eq.), alcohol (0.2 mmol, 1.0 eq.), K<sub>2</sub>CO<sub>3</sub> (0.4 mmol, 2.0 eq.), and KI (0.6 mmol, 3.0 eq.) in dry acetone (3.0 mL) was heated to reflux for 15 h under nitrogen atmosphere. The mixture was poured into CH<sub>2</sub>Cl<sub>2</sub> (200 mL), and washed with brine (100 mL). After drying over MgSO<sub>4</sub> and filtration over a paper filter, the volatiles were evaporated in a rotavap under reduced pressure. The remaining solid was purified by column chromatography (silica, CH<sub>2</sub>Cl<sub>2</sub> 100% → CH<sub>2</sub>Cl<sub>2</sub>/EtOH = 50/1).

**General Procedure C. Synthesis of NHC-metal complexes.** A mixture of imidazolium salt (0.06 mmol, 1 eq.), K<sub>2</sub>CO<sub>3</sub> (0.18 mmol, 3 eq.), and the corresponding metal source, [AuCl(SMe<sub>2</sub>)] (0.06 mmol, 1 eq.) or [CuCl(SMe<sub>2</sub>)] (0.06 mmol, 1 eq.) or [RhCl(cod)]<sub>2</sub> (0.03 mmol, 0.5 eq.) or [IrCl(cod)]<sub>2</sub> (0.03 mmol, 0.5 eq.) or [Pd(allyl)Cl]<sub>2</sub> (0.03 mmol, 0.5 eq.) in dry acetone (2.0 mL) was heated to reflux for 15 h under nitrogen atmosphere. CH<sub>2</sub>Cl<sub>2</sub> (ca. 10 mL) was added to the reaction mixture and the solution filtered through a celite plug. The crude mixture obtained after evaporation of the volatiles was purified by column chromatography (EtOAc/cyclohexane) to afford the desired complex.

**General procedure D. Synthesis of 8-Amino Bodipy derivatives B1, B2, B3 and B4:** To a solution of the corresponding 8-Chloro-Bodipy<sup>[3]</sup> (0.5 mmol, 1.0 eq.) in CH<sub>2</sub>Cl<sub>2</sub> (5 mL) propylamine (1.0 mmol, 2.0 eq.) was added. The reaction mixture was stirred at rt for 2 h. After the addition of water (50 mL), the reaction mixture was poured into CH<sub>2</sub>Cl<sub>2</sub> (30 mL) and the organic layer separated. The organic solution was washed with brine (25 mL) and water, dried over MgSO<sub>4</sub>, filtered over a paper filter and evaporated on the rotavap under reduced pressure. The crude product was purified by column chromatography on silica (CH<sub>2</sub>Cl<sub>2</sub>/MeOH = 30/1).

## Synthesis of individual compounds

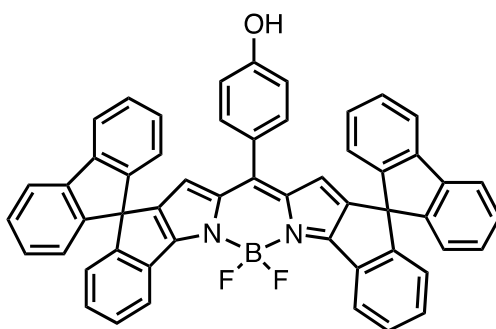

**Synthesis of 10.** General Procedure A: Pyrrole **3** (100 mg, 0.33 mmol), 4-Hydroxybenzaldehyde (20 mg, 0.16 mmol), DDQ (36 mg, 0.16 mmol), Et<sub>3</sub>N (0.2 mL, 1.4 mmol), BF<sub>3</sub>OEt<sub>2</sub> (0.3 mL, 2.4 mmol) were placed in 25 mL Schlenk flask and dissolved in dry CH<sub>2</sub>Cl<sub>2</sub> (5.0 mL). The crude red product was purified by column chromatography (EtOAc/cyclohexane = 1/4) and gave Bodipy **10** (46 mg, 38%) as a dark red powder.

<sup>1</sup>H NMR (CDCl<sub>3</sub>, 500 MHz): δ / ppm = 8.51 (d, *J* = 7.7 Hz, 2H), 7.82 (dt, *J* = 7.7, 0.9 Hz, 4H), 7.52 (td, *J* = 7.6, 1.1 Hz, 2H), 7.39 (td, *J* = 7.5, 1.1 Hz, 4H), 7.28 – 7.24 (m, 2H), 7.20 (dtd, *J* = 11.1, 7.5, 1.2 Hz, 6H), 6.97 (dt, *J* = 7.6, 1.0 Hz, 4H), 6.73 – 6.69 (m, 2H), 6.64 (d, *J* = 7.7 Hz, 2H), 6.23 (s, 2H), 4.99 (s, 1H).

<sup>13</sup>C NMR (126 MHz, CDCl<sub>3</sub>): δ / ppm = 161.4, 157.1, 156.7, 148.2, 143.0, 142.0, 141.3, 141.1, 132.5, 132.2, 130.5, 128.8, 128.0, 127.9, 126.7, 124.3, 124.3, 124.2, 120.6, 120.1, 115.1, 59.7, 53.4.

HRMS (ESI positive): *m/z* calcd. for C<sub>53</sub>H<sub>32</sub>BF<sub>2</sub>N<sub>2</sub>O [M+H]<sup>+</sup> 761.25758, found 761.25657, calcd. for C<sub>53</sub>H<sub>31</sub>BF<sub>2</sub>N<sub>2</sub>NaO [M+Na]<sup>+</sup> 783.23952, found 783.24024, calcd. for C<sub>53</sub>H<sub>31</sub>BFN<sub>2</sub>O [M-F]<sup>+</sup> 741.25135, found 741.25217.

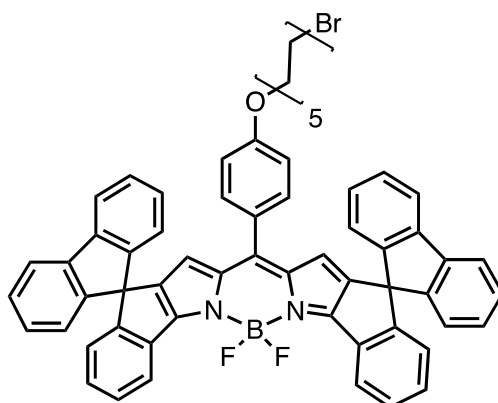

**Synthesis of 4.** General Procedure B: Bodipy **10** (153 mg, 0.2 mmol, 1 eq.), 1,10-Dibromodecane (90 mg, 0.3 mmol, 1.5 eq.),  $K_2CO_3$  (55 mg, 0.4 mmol, 2 eq.), KI (100 mg, 0.6 mmol, 4 eq.) were placed in 10 mL round flask and dissolved in dry acetone (3.0 mL). The crude red product was purified by column chromatography (EtOAc/cyclohexane = 1/4) and gave **4** (55 mg, 28%) as a dark red powder.

$^1H$  NMR ( $CDCl_3$ , 500 MHz)  $\delta$  / ppm = 8.52 (d,  $J$  = 7.7 Hz, 2H), 7.82 (d,  $J$  = 7.6 Hz, 4H), 7.53 (td,  $J$  = 7.6, 1.1 Hz, 2H), 7.39 (td,  $J$  = 7.5, 1.1 Hz, 4H), 7.34 – 7.29 (m, 2H), 7.21 (dtd,  $J$  = 15.1, 7.5, 1.1 Hz, 6H), 6.98 (d,  $J$  = 7.6 Hz, 4H), 6.77 (d,  $J$  = 8.7 Hz, 2H), 6.67 (d,  $J$  = 7.7 Hz, 2H), 3.86 (t,  $J$  = 6.5 Hz, 2H), 3.41 (t,  $J$  = 6.9 Hz, 2H), 1.85 (p,  $J$  = 6.9 Hz, 2H), 1.76 – 1.67 (m, 2H), 1.44 – 1.34 (m, 4H), 1.28 (d,  $J$  = 2.4 Hz, 8H).

$^{13}C$  NMR (75 MHz,  $CDCl_3$ )  $\delta$  / ppm = 161.2, 160.6, 156.6, 148.3, 142.9, 142.3, 141.3, 141.1, 132.6, 131.9, 130.4, 128.7, 127.97, 127.93, 126.2, 124.29, 124.23, 124.20, 120.7, 120.1, 114.2, 68.0, 59.8, 34.0, 32.8, 29.38, 29.30, 29.2, 29.0, 28.7, 28.1, 25.9. HRMS (ESI positive):  $m/z$  calcd. for  $C_{63}H_{51}BBBrF_2N_2O$   $[M+H]^+$  981.32254, found 981.32330, calcd. for  $C_{63}H_{50}BBBrF_2N_2NaO$   $[M+Na]^+$  1003.30449, found 1003.30674, calcd. for  $C_{63}H_{50}BBBrFN_2O$   $[M-F]^+$  961.31631, found 961.31873.

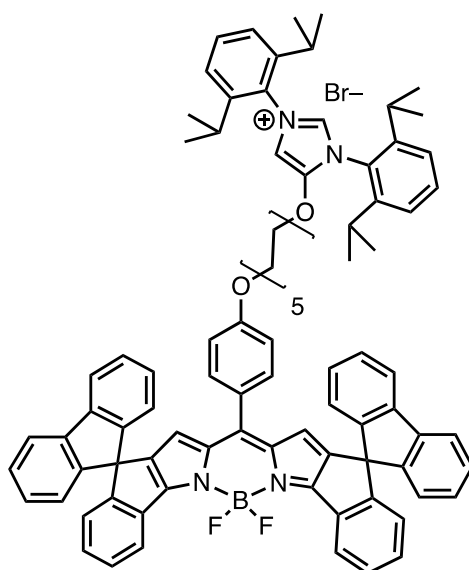

**Synthesis of 5·HBr.** General Procedure B: 1,3-bis(2,6-diisopropylphenyl)-4-hydroxy-1H-imidazol-3-ium chloride (97 mg, 0.2 mmol, 1 eq.), Bodipy **4** (294 mg, 0.3 mmol),  $\text{K}_2\text{CO}_3$  (55 mg, 0.4 mmol, 2 eq.), KI (100 mg, 0.6 mmol, 4 eq.) were placed in 10 mL round flask and dissolved in dry acetone (3.0 mL). The crude red product was purified by column chromatography ( $\text{MeOH}/\text{CH}_2\text{Cl}_2 = 1/20$ ) and gave **5·HBr** (64 mg, 23%) as a dark red powder.

$^1\text{H}$  NMR ( $\text{CDCl}_3$ , 500 MHz):  $\delta$  / ppm = 8.90 (dt,  $J = 4.6, 2.1$  Hz, 1H), 8.52 (d,  $J = 7.6$  Hz, 2H), 7.98 (dq,  $J = 7.4, 2.4$  Hz, 1H), 7.82 (d,  $J = 7.6$  Hz, 4H), 7.59 (q,  $J = 7.6$  Hz, 2H), 7.53 (t,  $J = 7.6$  Hz, 2H), 7.42 – 7.32 (m, 8H), 7.30 (d,  $J = 8.6$  Hz, 2H), 7.20 (dt,  $J = 17.5, 7.5$  Hz, 6H), 6.98 (d,  $J = 7.5$  Hz, 4H), 6.79 – 6.73 (m, 2H), 6.66 (d,  $J = 7.7$  Hz, 2H), 6.25 (s, 2H), 4.52 (t,  $J = 6.3$  Hz, 2H), 3.84 (t,  $J = 6.4$  Hz, 2H), 2.57 (hept,  $J = 6.9$  Hz, 2H), 2.46 (hept,  $J = 7.0$  Hz, 2H), 1.70 (ddt,  $J = 21.5, 14.2, 6.6$  Hz, 4H), 1.40 (d,  $J = 6.8$  Hz, 6H), 1.37 – 1.15 (m, 30H).

$^{13}\text{C}$  NMR (126 MHz,  $\text{CDCl}_3$ ):  $\delta$  / ppm = 161.3, 160.6, 156.6, 148.5, 148.3, 145.7, 145.1, 142.9, 142.3, 141.3, 141.1, 132.6, 132.31, 132.21, 132.0, 130.5, 130.4, 130.2, 128.8, 128.0, 127.9, 126.3, 126.1, 124.8, 124.7, 124.3, 124.3, 124.2, 120.7, 120.1, 114.2, 104.3, 75.9, 68.1, 59.8, 29.41, 29.32, 29.25, 29.23, 29.18, 29.12, 29.01, 28.6, 25.9, 25.5, 25.0, 24.37, 24.14, 23.5.

HRMS (ESI positive):  $m/z$  calcd. for  $\text{C}_{90}\text{H}_{86}\text{BF}_2\text{N}_4\text{O}_2$   $[\text{M}-\text{Br}]^+$  1303.68119, found 1303.68127.



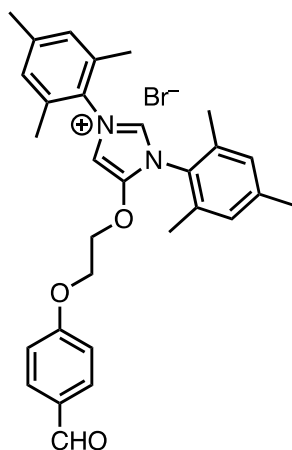

**Synthesis of 7·HBr.** General Procedure B: 1,3-bis(2,4,6-trimethylphenyl)-4-hydroxy-1H-imidazol-3-ium chloride (71 mg, 0.2 mmol, 1.0 eq.), 4-(2-bromoethoxy)benzaldehyde (69 mg, 0.3 mmol, 1.5 eq.), K<sub>2</sub>CO<sub>3</sub> (55 mg, 0.4 mmol, 2 eq.), KI (100 mg, 0.6 mmol, 4 eq.) were placed in 10 mL round flask and dissolved in dry acetone (3.0 mL). The crude red product was purified by column chromatography (MeOH/CH<sub>2</sub>Cl<sub>2</sub>= 1/25) and gave **7·HBr** (55 mg, 50%) as a white powder.

<sup>1</sup>H NMR (500 MHz, CDCl<sub>3</sub>): δ / ppm = 9.78 (s, 1H), 9.04 (d, *J* = 1.8 Hz, 1H), 7.73 – 7.68 (m, 2H), 7.57 (d, *J* = 1.9 Hz, 1H), 6.96 – 6.92 (m, 4H), 6.91 – 6.85 (m, 2H), 5.26 (s, 1H), 4.85 – 4.80 (m, 2H), 4.38 – 4.33 (m, 2H), 2.27 (s, 6H), 2.16 (s, 6H), 2.05 (s, 6H).

<sup>13</sup>C NMR (126 MHz, CDCl<sub>3</sub>) δ / ppm = 190.7, 163.0, 147.2, 141.6, 141.3, 134.8, 134.0, 132.0, 130.9, 130.7, 130.2, 129.88, 129.82, 126.6, 114.8, 103.3, 73.3, 66.1, 53.6, 21.2, 21.1, 17.85, 17.71.

HRMS (ESI positive): *m/z* calcd. for C<sub>30</sub>H<sub>33</sub>N<sub>2</sub>O<sub>3</sub> [M-Br]<sup>+</sup> 469.24857, found 469.24878.

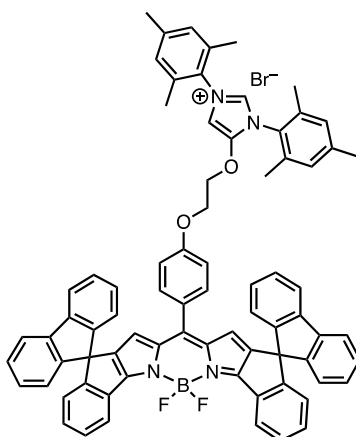

**Synthesis of 8-HBr** General Procedure A: Pyrrole **3** (100 mg, 0.33 mmol), aldehyde **7-HBr** (88 mg, 0.16 mmol), DDQ (36 mg, 0.16 mmol), Et<sub>3</sub>N (0.2 mL, 1.4 mmol), BF<sub>3</sub>OEt<sub>2</sub> (0.3 mL, 2.4 mmol) were placed in 25 mL Schlenk flask and dissolved in dry CH<sub>2</sub>Cl<sub>2</sub> (5.0 mL). The crude red product was purified by column chromatography (MeOH/CH<sub>2</sub>Cl<sub>2</sub>= 1/20) and gave **8-HBr** (82 mg, 43%) as a dark red powder.

<sup>1</sup>H NMR (CDCl<sub>3</sub>, 300 MHz): δ / ppm = 8.50 (d, J = 7.7 Hz, 2H), 8.09 (s, 1H), 7.80 (d, J = 7.6 Hz, 4H), 7.51 (t, J = 7.6 Hz, 2H), 7.36 (t, J = 7.5 Hz, 4H), 7.24 – 7.13 (m, 9H), 7.00 – 6.92 (m, 6H), 6.90 (s, 2H), 6.64 (dd, J = 8.1, 5.6 Hz, 4H), 6.16 (s, 2H), 4.62 – 4.57 (m, 2H), 4.17 – 4.11 (m, 2H), 2.32 (s, 3H), 2.21 (s, 3H), 2.11 (s, 6H), 2.00 (s, 6H).  
<sup>13</sup>C NMR (75 MHz, CD<sub>2</sub>Cl<sub>2</sub>) δ / ppm = 159.6, 157.6, 154.7, 146.3, 145.7, 141.2, 139.79, 139.67, 139.64, 139.41, 139.06, 132.9, 132.2, 130.6, 130.0, 128.87, 128.63, 127.98, 127.89, 126.9, 126.15, 126.05, 125.3, 124.7, 122.44, 122.37, 122.25, 118.5, 118.2, 112.3, 100.8, 75.4, 75.11, 74.9, 70.8, 63.8, 57.8, 19.24, 19.20, 15.39, 15.22.

HRMS (ESI positive): *m/z* calcd. for C<sub>76</sub>H<sub>58</sub>BF<sub>2</sub>N<sub>4</sub>O<sub>2</sub> [M-Cl]<sup>+</sup> 1107.46154, found 1107.46219.

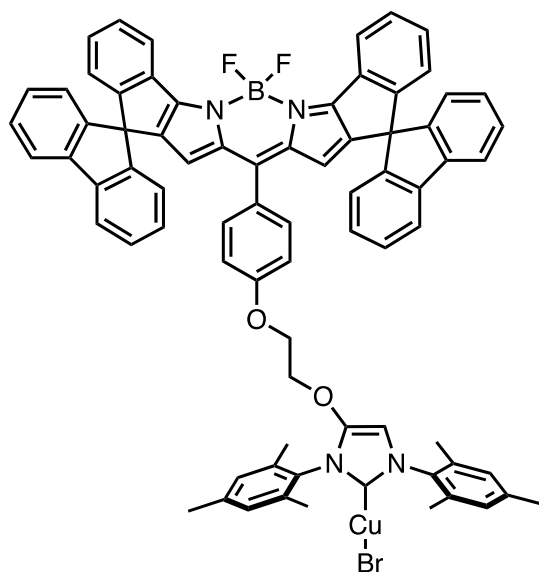

**Synthesis of [CuBr(8)].** General Procedure C: Imidazolium salt **8-HBr** (71 mg, 0.06 mmol, 1 eq.),  $K_2CO_3$  (25 mg, 0.18 mmol, 3 eq.), [CuBr(SMe<sub>2</sub>)] (12.6 mg, 0.06 mmol, 1 eq.) were placed in dried 5 mL Schlenk flask and dissolved in dry acetone (2.0 mL). The crude red product was purified by column chromatography (EtOAc/cyclohexane = 1/5) and gave [CuBr(**8**)] (52 mg, 69%) as a microcrystalline dark red powder.

<sup>1</sup>H NMR (CD<sub>2</sub>Cl<sub>2</sub>, 300 MHz):  $\delta$  / ppm = 8.36 (d,  $J$  = 7.7 Hz, 2H), 7.75 (dt,  $J$  = 7.5, 1.0 Hz, 4H), 7.44 (td,  $J$  = 7.6, 1.1 Hz, 2H), 7.29 (td,  $J$  = 7.5, 1.1 Hz, 4H), 7.12 (dtd,  $J$  = 20.6, 7.5, 1.0 Hz, 8H), 6.92 (q,  $J$  = 0.7 Hz, 2H), 6.85 (dt,  $J$  = 7.6, 0.9 Hz, 4H), 6.80 (dd,  $J$  = 1.3, 0.7 Hz, 2H), 6.60 – 6.52 (m, 4H), 6.31 (s, 1H), 6.11 (s, 2H), 4.16 – 4.09 (m, 2H), 4.02 – 3.95 (m, 2H), 2.27 (s, 3H), 2.14 (s, 3H), 2.00 (d,  $J$  = 0.6 Hz, 6H), 1.90 (d,  $J$  = 0.6 Hz, 6H).

<sup>13</sup>C NMR (75 MHz, CD<sub>2</sub>Cl<sub>2</sub>)  $\delta$  / ppm = 174.5 (C<sub>NHC</sub>), 161.3, 159.7, 156.8, 148.1, 147.9, 143.2, 141.9, 141.4, 141.0, 139.6, 139.5, 135.8, 135.4, 134.8, 132.5, 132.0, 131.4, 130.6, 129.24, 129.14, 128.8, 128.1, 127.9, 127.1, 124.2, 124.0, 120.4, 120.2, 114.3, 99.4, 71.5, 66.3, 59.8, 29.7, 29.1, 20.9, 17.6.

HRMS (ESI positive):  $m/z$  calcd. for C<sub>76</sub>H<sub>57</sub>BCuF<sub>2</sub>N<sub>4</sub>O<sub>2</sub> [M-Cl]<sup>+</sup> 1169.38332, found 1169.38430.

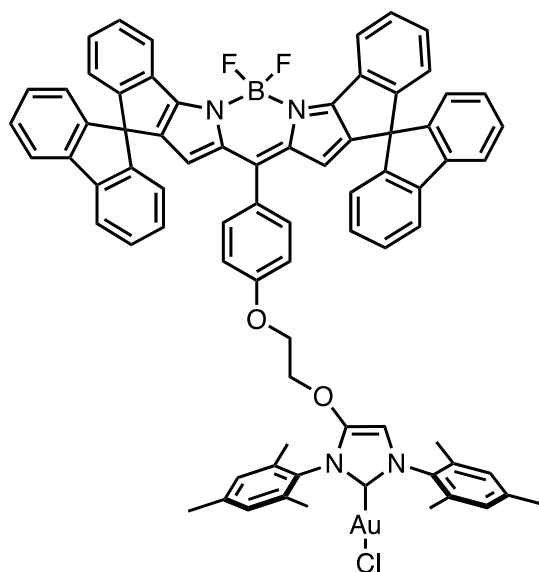

**Synthesis of [AuCl(8)].** General Procedure C: Imidazolium salt **8-HBr** (71 mg, 0.06 mmol, 1 eq.),  $\text{K}_2\text{CO}_3$  (25 mg, 0.18 mmol, 3 eq.),  $[\text{AuCl}(\text{SMe}_2)]$  (17.7 mg, 0.06 mmol, 1 eq.) were placed in dried 5 mL Schlenk flask and dissolved in dry acetone (2.0 mL). The crude red product was purified by column chromatography (EtOAc/cyclohexane = 1/5) and gave  $[\text{AuCl}(\mathbf{8})]$  (30 mg, 37%) as a microcrystalline dark red powder.

$^1\text{H}$  NMR ( $\text{CD}_2\text{Cl}_2$ , 500 MHz):  $\delta$  / ppm = 8.49 (d,  $J = 7.7$  Hz, 2H), 7.88 (d,  $J = 7.6$  Hz, 4H), 7.58 (td,  $J = 7.6, 1.0$  Hz, 2H), 7.43 (t,  $J = 7.5$  Hz, 4H), 7.35 – 7.26 (m, 4H), 7.22 (td,  $J = 7.5, 1.1$  Hz, 4H), 7.06 (s, 2H), 6.99 (d,  $J = 7.6$  Hz, 4H), 6.94 (d,  $J = 4.5$  Hz, 2H), 6.74 – 6.65 (m, 4H), 6.47 (d,  $J = 3.0$  Hz, 1H), 6.25 (d,  $J = 2.3$  Hz, 2H), 4.31 – 4.25 (m, 2H), 4.18 – 4.10 (m, 2H), 2.40 (s, 3H), 2.29 (s, 3H), 2.13 (d,  $J = 9.8$  Hz, 6H), 2.03 (d,  $J = 5.0$  Hz, 6H).

$^{13}\text{C}$  NMR (126 MHz,  $\text{CD}_2\text{Cl}_2$ )  $\delta$  / ppm = 178.3 ( $\text{C}_{\text{NHC}}$ ), 168.0, 161.3, 159.6, 156.8, 148.1, 147.5, 147.3, 141.9, 141.4, 141.0, 140.0, 139.92, 139.86, 139.82, 135.50, 135.47, 135.30, 135.19, 134.95, 134.91, 132.5, 132.0, 130.92, 130.79, 130.6, 129.26, 129.22, 129.18, 129.13, 128.8, 128.1, 127.9, 127.1, 124.22, 124.07, 123.97, 120.39, 120.22, 114.3, 99.29, 99.22, 71.53, 71.51, 66.24, 66.22, 59.8, 53.9, 53.7, 53.4, 53.2, 53.00, 20.9, 17.56, 17.52, 17.40, 17.38.

HRMS (ESI positive):  $m/z$  calcd. for  $\text{C}_{76}\text{H}_{57}\text{AuBF}_2\text{N}_4\text{O}_2$   $[\text{M}-\text{Cl}]^+$  1303.42082, found 1303.42138.

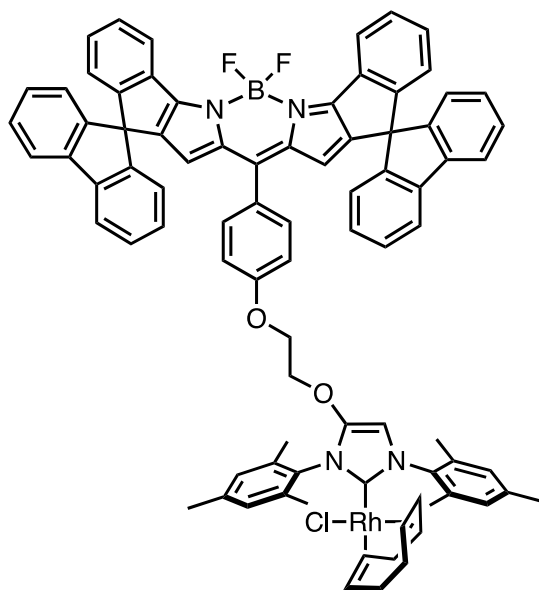

**Synthesis of [RhCl(cod)(8)].** General Procedure C: Imidazolium salt **8-HBr** (71 mg, 0.06 mmol, 1 eq.),  $\text{K}_2\text{CO}_3$  (25 mg, 0.18 mmol, 3 eq.),  $[\text{RhCl}(\text{cod})]_2$  (14.8 mg, 0.03 mmol, 0.5 eq.) were placed in dried 5 mL Schlenk flask and dissolved in dry acetone (2.0 mL). The crude red product was purified by column chromatography (EtOAc/cyclohexane = 1/3) and gave  $[\text{RhCl}(\text{cod})(\mathbf{8})]$  (54 mg, 67%) as a microcrystalline dark red powder.

$^1\text{H}$  NMR ( $\text{CD}_2\text{Cl}_2$ , 300 MHz):  $\delta$  / ppm = 8.36 (d,  $J = 7.7$  Hz, 2H), 7.73 (dt,  $J = 7.7$ , 1.0 Hz, 4H), 7.43 (td,  $J = 7.6$ , 1.1 Hz, 2H), 7.27 (td,  $J = 7.5$ , 1.1 Hz, 4H), 7.17 – 7.02 (m, 8H), 6.93 (s, 1H), 6.89 (s, 1H), 6.84 (dt,  $J = 7.6$ , 0.9 Hz, 4H), 6.80 (s, 1H), 6.72 (s, 1H), 6.59 – 6.44 (m, 4H), 6.17 (s, 1H), 6.11 (s, 2H), 4.28 (s, 2H), 3.99 (dt,  $J = 4.6$ , 2.8 Hz, 2H), 3.90 (dt,  $J = 6.6$ , 3.0 Hz, 2H), 3.47 (s, 1H), 3.20 (s, 1H), 3.11 (s, 1H), 2.51 (s, 2H), 2.28 (s, 3H), 2.26 (s, 3H), 2.15 (s, 3H), 2.13 (s, 3H), 2.04 (s, 3H), 2.02 (s, 1H), 1.98 (s, 3H), 1.84 (s, 3H), 1.69 (s, 4H), 1.50 – 1.39 (m, 4H).

$^{13}\text{C}$  NMR (75 MHz,  $\text{CD}_2\text{Cl}_2$ )  $\delta$  / ppm = 180.7 ( $\text{C}_{\text{NHC}}$ ) (d,  $J(^{13}\text{C} - ^{103}\text{Rh}) = 53.0$  Hz), 163.2, 161.7, 158.7, 150.6, 150.0, 145.0, 144.0, 143.3, 142.9, 140.59, 140.46, 140.0, 139.3, 138.7, 137.4, 136.5, 134.5, 134.3, 133.8, 132.4, 131.2, 131.0, 130.6, 130.0, 129.84, 128.80, 126.1, 125.9, 122.4, 122.1, 116.3, 102.8, 97.6, 97.2, 72.7, 71.2, 70.0, 69.7, 68.1, 61.7, 34.8, 34.3, 33.5, 32.5, 31.6, 31.0, 30.4, 30.0, 28.8, 22.7, 21.3, 19.8.

HRMS (ESI positive):  $m/z$  calcd. for  $\text{C}_{84}\text{H}_{69}\text{BF}_2\text{N}_4\text{O}_2\text{Rh}$   $[\text{M}-\text{Cl}]^+$  1317.45367, found 1317.45457.

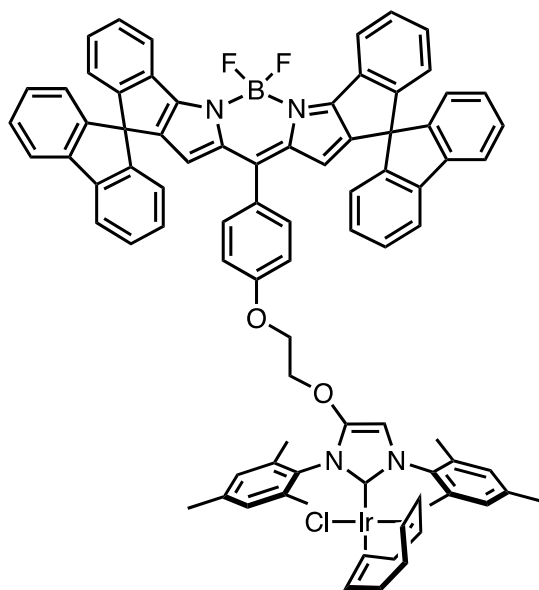

**Synthesis of [IrCl(cod)(8)].** General Procedure C: Imidazolium salt **8-HBr** (71 mg, 0.06 mmol, 1 eq.),  $K_2CO_3$  (25 mg, 0.18 mmol, 3 eq.),  $[IrCl(cod)]_2$  (20.2 mg, 0.03 mmol, 0.5 eq.) were placed in dried 5 mL Schlenk flask and dissolved in dry acetone (2.0 mL). The crude red product was purified by column chromatography (EtOAc/cyclohexane = 1/3) and gave  $[IrCl(cod)(8)]$  (40 mg, 67%) as a microcrystalline dark red powder.

$^1H$  NMR ( $CD_2Cl_2$ , 300 MHz):  $\delta$  / ppm = 8.36 (d,  $J$  = 7.7 Hz, 2H), 7.74 (dt,  $J$  = 7.6, 1.0 Hz, 4H), 7.44 (td,  $J$  = 7.6, 1.1 Hz, 2H), 7.29 (td,  $J$  = 7.5, 1.1 Hz, 4H), 7.11 (dtd,  $J$  = 20.1, 7.6, 1.1 Hz, 8H), 6.85 (dt,  $J$  = 7.5, 1.0 Hz, 6H), 6.75 (s, 1H), 6.69 (s, 1H), 6.59 – 6.45 (m, 4H), 6.18 (s, 1H), 6.12 (s, 2H), 4.02 (dt,  $J$  = 4.0, 2.5 Hz, 2H), 3.98 – 3.82 (m, 4H), 2.89 (d,  $J$  = 6.4 Hz, 1H), 2.81 (s, 1H), 2.26 (s, 3H), 2.22 (s, 3H), 2.10 (d,  $J$  = 3.3 Hz, 6H), 2.03 (s, 3H), 1.89 (s, 3H), 1.66 – 1.47 (m, 4H), 1.26 – 1.11 (m, 4H).

$^{13}C$  NMR (75 MHz,  $CD_2Cl_2$ ):  $\delta$  / ppm = 176.1 ( $C_{NHC}$ ), 161.3, 156.8, 148.4, 148.1, 143.1, 142.1, 141.4, 141.0, 138.6, 138.5, 137.9, 137.1, 136.6, 135.5, 134.6, 132.5, 132.1, 132.0, 130.5, 129.1, 128.9, 128.7, 128.2, 128.1, 127.9, 126.9, 124.2, 124.1, 124.0, 120.4, 120.2, 114.4, 100.6, 82.1, 81.4, 70.8, 66.2, 59.8, 53.9, 53.7, 53.4, 53.2, 53.0, 51.8, 51.3, 33.7, 33.1, 31.9, 29.7, 29.4, 29.1, 28.5, 22.7, 20.8, 19.3, 18.0, 13.9.

HRMS (ESI positive):  $m/z$  calcd. for  $C_{84}H_{69}BF_2IrN_4O_2$   $[M-Cl]^+$  1407.51109, found 1407.51211, calcd. for  $C_{86}H_{72}BF_2IrN_5O_2$   $[M-Cl+CH_3CN]^+$  1448.53764, found 1448.53865.

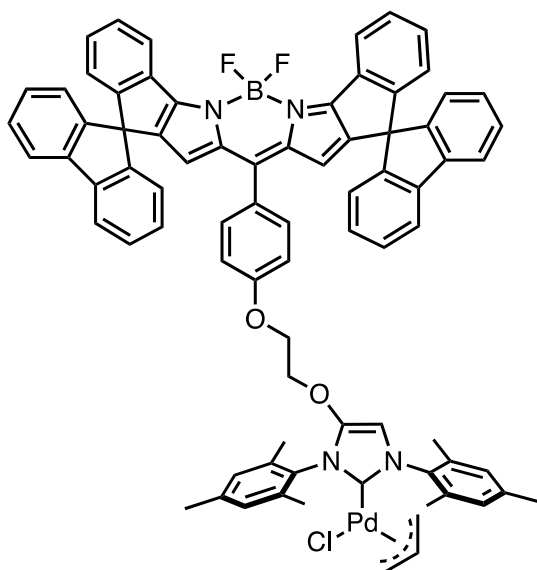

**Synthesis of [Pd(allyl)Cl](**8**).** General Procedure C: Imidazolium salt **8**·HBr (71 mg, 0.06 mmol, 1 eq.), K<sub>2</sub>CO<sub>3</sub> (25 mg, 0.18 mmol, 3 eq.), [Pd(allyl)Cl]<sub>2</sub> (11 mg, 0.03 mmol, 0.5 eq.) were placed in dried 5 mL Schlenk flask and dissolved in dry acetone (2.0 mL). The crude red product was purified by column chromatography (EtOAc/cyclohexane = 1/2) and gave [Pd(allyl)Cl](**8**) (37 mg, 48%) as a microcrystalline dark red powder.

<sup>1</sup>H NMR (300 MHz, CD<sub>2</sub>Cl<sub>2</sub>): δ / ppm = δ 8.36 (d, *J* = 7.7 Hz, 2H), 7.74 (dt, *J* = 7.7, 1.0 Hz, 4H), 7.44 (td, *J* = 7.6, 1.1 Hz, 2H), 7.29 (td, *J* = 7.5, 1.1 Hz, 4H), 7.19 – 7.12 (m, 4H), 7.08 (td, *J* = 7.5, 1.1 Hz, 4H), 6.85 (dt, *J* = 7.5, 1.0 Hz, 6H), 6.72 (d, *J* = 3.6 Hz, 2H), 6.61 – 6.51 (m, 4H), 6.31 (s, 1H), 6.13 (s, 2H), 4.73 (ddd, *J* = 18.8, 13.3, 7.4 Hz, 1H), 4.08 (dd, *J* = 5.8, 2.9 Hz, 2H), 4.02 – 3.92 (m, 2H), 3.60 (dd, *J* = 7.5, 1.7 Hz, 1H), 3.06 (d, *J* = 6.6 Hz, 1H), 2.57 (d, *J* = 13.4 Hz, 1H), 2.23 (s, 3H), 2.10 (s, 3H), 2.08 (d, *J* = 2.6 Hz, 6H), 1.99 (s, 3H), 1.94 (s, 3H), 1.62 (d, *J* = 12.0 Hz, 1H).

<sup>13</sup>C NMR (75 MHz, CD<sub>2</sub>Cl<sub>2</sub>): δ / ppm = 178.4 (C<sub>NHC</sub>), 161.3, 159.8, 156.8, 148.6, 148.1, 143.1, 142.0, 141.4, 141.0, 138.9, 138.7, 136.5, 136.3, 136.1, 135.7, 132.5, 132.2, 131.9, 130.5, 128.7, 128.1, 127.9, 120.0, 124.2, 124.0, 120.5, 120.2, 114.4, 114.1, 100.2, 71.1, 70.9, 66.2, 59.8, 49.8, 29.7, 26.9, 20.8, 18.0, 17.9.

HRMS (ESI positive): *m/z* calcd. for C<sub>79</sub>H<sub>62</sub>BF<sub>2</sub>N<sub>4</sub>O<sub>2</sub>Pd [M-Cl]<sup>+</sup> 1253.39687, found 1253.39942.

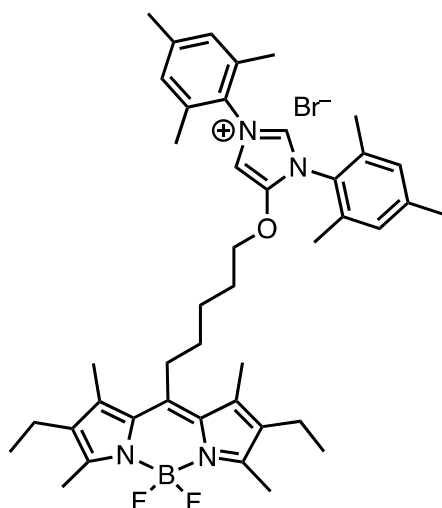

**Synthesis of 9-HBr.**<sup>[5]</sup> General Procedure B: Imidazolium salt-HCl (71 mg, 0.2 mmol, 1.0 eq.), Bodipy **11**<sup>[5]</sup> (136 mg, 0.3 mmol), K<sub>2</sub>CO<sub>3</sub> (55 mg, 0.4 mmol, 2 eq.), KI (100 mg, 0.6 mmol, 4 eq.) were placed in dried 10 mL Schlenk flask and dissolved in dry acetone (4.0 mL). The crude orange product was purified by column chromatography (MeOH/CH<sub>2</sub>Cl<sub>2</sub>= 1/20) and gave **9-HBr** (77 mg, 50%) as an orange powder.

<sup>1</sup>H NMR (500 MHz, CDCl<sub>3</sub>):  $\delta$  / ppm = 9.19 (d,  $J$  = 1.7 Hz, 1H), 7.50 (d,  $J$  = 1.8 Hz, 1H), 7.06 (s, 4H), 4.44 (t,  $J$  = 6.3 Hz, 2H), 2.96 (t,  $J$  = 7.7 Hz, 2H), 2.51 (s, 6H), 2.42 (q,  $J$  = 7.6 Hz, 4H), 2.37 (s, 3H), 2.36 (s, 3H), 2.29 (s, 6H), 2.27 (s, 6H), 2.16 (s, 6H), 1.86 (t,  $J$  = 6.6 Hz, 2H), 1.06 (t,  $J$  = 7.6 Hz, 6H).

<sup>13</sup>C NMR (126 MHz, CDCl<sub>3</sub>)  $\delta$  / ppm = 152.3, 147.5, 144.1, 141.7, 141.5, 135.5, 134.7, 134.1, 132.7, 130.9, 130.8, 130.6, 130.0, 129.9, 126.7, 102.6, 74.9, 31.3, 28.5, 28.2, 26.2, 21.19, 21.16, 17.9, 17.8, 17.2, 14.7, 13.5, 12.42, 12.40, 12.38.

HRMS (ESI positive):  $m/z$  calcd. for C<sub>34</sub>H<sub>56</sub>BF<sub>2</sub>N<sub>4</sub>O [M-Br]<sup>+</sup> 693.45098, found 693.45194.



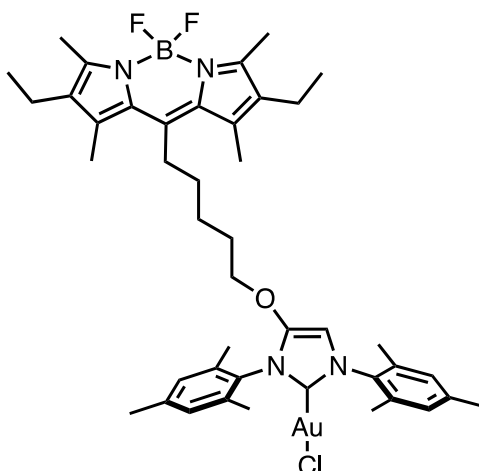

**Synthesis of [AuCl(**9**)].**<sup>[5]</sup> General Procedure C: Imidazolium salt **9-HBr** (46 mg, 0.06 mmol, 1 eq.), K<sub>2</sub>CO<sub>3</sub> (25 mg, 0.18 mmol, 3 eq.), [AuCl(SMe<sub>2</sub>)] (17.7 mg, 0.06 mmol, 1 eq.) were placed in dried 5 mL Schlenk flask and dissolved in dry acetone (2.0 mL). The crude red product was purified by column chromatography (EtOAc/cyclohexane = 1/5) and gave [AuCl(**9**)] (38 mg, 69%) as a microcrystalline, orange powder.

<sup>1</sup>H NMR (CD<sub>2</sub>Cl<sub>2</sub>, 300 MHz):  $\delta$  / ppm = 7.08 (d, *J* = 2.9 Hz, 4H), 6.42 (s, 1H), 4.04 (t, *J* = 6.2 Hz, 2H), 3.07 – 2.88 (m, 2H), 2.51 – 2.42 (m, 10H), 2.40 (s, 3H), 2.38 (s, 3H), 2.30 (s, 6H), 2.20 (s, 6H), 2.15 (s, 6H), 1.84 – 1.73 (m, 2H), 1.68 – 1.47 (m, 6H), 1.08 (t, *J* = 7.5 Hz, 6H).

<sup>13</sup>C NMR (75 MHz, CD<sub>2</sub>Cl<sub>2</sub>)  $\delta$  / ppm = 178.0 (C<sub>NHC</sub>), 152.1, 147.5, 144.4, 139.9, 139.8, 135.8, 135.5, 135.3, 134.9, 132.8, 131.0, 130.8, 129.22, 129.15, 98.6, 72.6, 31.2, 29.7, 28.4, 28.2, 26.9, 26.2, 20.9, 17.6, 17.4, 17.1, 14.6, 13.1, 12.1.

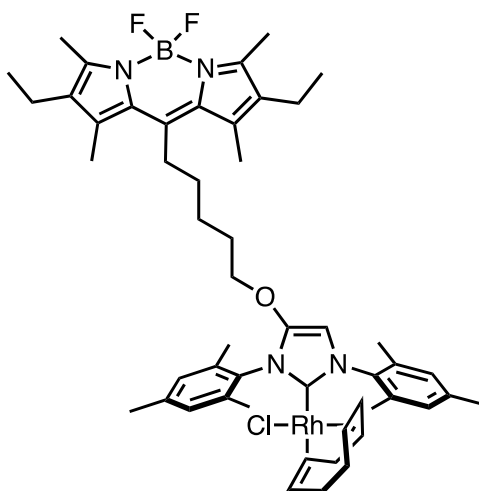

**Synthesis of [RhCl(cod)(9)].** General Procedure C: Imidazolium salt **9-HBr** (46 mg, 0.06 mmol, 1 eq.),  $\text{K}_2\text{CO}_3$  (25 mg, 0.18 mmol, 3 eq.),  $[\text{RhCl}(\text{cod})]_2$  (14.8 mg, 0.03 mmol, 0.5 eq.) were placed in dried 5 mL Schlenk flask and dissolved in dry acetone (2.0 mL). The crude red product was purified by column chromatography (EtOAc/cyclohexane = 1/3) and gave  $[\text{RhCl}(\text{cod})(\mathbf{9})]$  (41 mg, 72%) as a microcrystalline orange powder.

$^1\text{H}$  NMR ( $\text{CD}_2\text{Cl}_2$ , 300 MHz):  $\delta$  / ppm = 6.92 (d,  $J$  = 4.0 Hz, 4H), 6.17 (d,  $J$  = 1.6 Hz, 1H), 4.61 (d,  $J$  = 4.2 Hz, 2H), 3.80 (t,  $J$  = 6.2 Hz, 2H), 3.62 – 3.48 (m, 1H), 3.45 (dd,  $J$  = 7.1, 3.3 Hz, 1H), 2.90 – 2.78 (m, 2H), 2.42 – 2.22 (m, 24H), 2.18 (s, 6H), 2.12 (s, 3H), 2.06 (d,  $J$  = 3.0 Hz, 3H), 1.76 – 1.70 (m, 2H), 1.68 – 1.55 (m, 4H), 1.54 – 1.41 (m, 6H), 0.97 (t,  $J$  = 7.5 Hz, 6H).

$^{13}\text{C}$  NMR (75 MHz,  $\text{CD}_2\text{Cl}_2$ )  $\delta$  / ppm = 177.3 ( $\text{C}_{\text{NHC}}$ ) (d,  $J(^{13}\text{C} - ^{103}\text{Rh})$  = 52.3 Hz), 152.0, 149.2, 144.5, 138.7, 138.6, 137.7, 137.0, 136.9, 135.6, 135.7, 134.8, 132.6, 130.6, 129.5, 129.3, 128.3, 128.1, 101.0, 93.6, 93.5, 93.4, 93.3, 71.9, 71.6, 71.5, 71.3, 37.1, 32.4, 31.8, 31.2, 30.0, 29.7, 29.3, 28.8, 28.5, 28.3, 26.9, 26.3, 22.7, 21.7, 21.5, 20.8, 18.19, 18.14, 17.1, 14.6, 13.9, 13.1, 12.1.

HRMS (ESI positive):  $m/z$  calcd. for  $\text{C}_{51}\text{H}_{67}\text{BF}_2\text{N}_4\text{ORh}$   $[\text{M}-\text{Cl}]^+$  903.44310, found 903.44289.



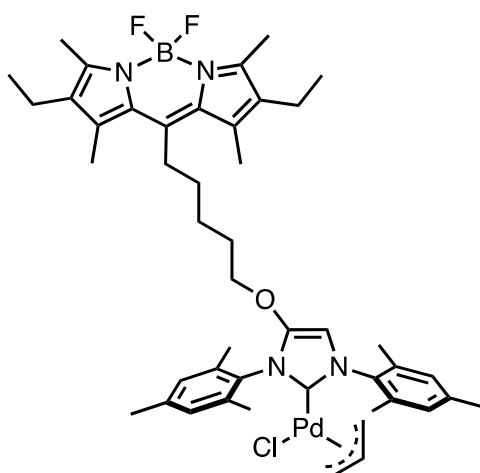

**Synthesis of [Pd(allyl)Cl(**9**)].** General Procedure C: Imidazolium salt **9**·HBr (46 mg, 0.06 mmol, 1 eq.), K<sub>2</sub>CO<sub>3</sub> (25 mg, 0.18 mmol, 3 eq.), [Pd(allyl)Cl]<sub>2</sub> (11 mg, 0.03 mmol, 0.5 eq.) were placed in dried 5 mL Schlenk flask and dissolved in dry acetone (2.0 mL). The crude red product was purified by column chromatography (EtOAc/cyclohexane = 1/2) and gave [Pd(allyl)Cl(**9**)] (38 mg, 72%) as a microcrystalline orange powder.

<sup>1</sup>H NMR (CD<sub>2</sub>Cl<sub>2</sub>, 300 MHz): δ / ppm = 6.86 (ddq, *J* = 3.5, 1.3, 0.7 Hz, 4H), 6.31 (s, 1H), 4.65 (dddd, *J* = 13.2, 12.4, 7.4, 6.8 Hz, 1H), 3.87 (t, *J* = 6.2 Hz, 2H), 3.78 – 3.64 (m, 2H), 2.93 – 2.77 (m, 2H), 2.38 – 2.28 (m, 11H), 2.23 (s, 3H), 2.22 (s, 3H), 2.19 (s, 6H), 2.18 – 2.15 (m, 6H), 2.14 (s, 3H), 2.10 (s, 3H), 1.93 (dq, *J* = 12.3, 0.9 Hz, 1H), 1.72 – 1.59 (m, 2H), 1.43 (s, 6H), 0.97 (t, *J* = 7.5 Hz, 6H).

<sup>13</sup>C NMR (126 MHz, CD<sub>2</sub>Cl<sub>2</sub>) δ / ppm = 177.1 (C<sub>NHC</sub>), 152.1, 149.1, 144.5, 138.9, 138.7, 136.6, 136.2, 136.0, 135.9, 135.4, 132.8, 132.4, 130.8, 128.94, 128.89, 128.86, 128.71, 112.7, 100.0, 72.1, 67.3, 58.5, 31.2, 29.7, 28.5, 28.3, 26.9, 26.3, 20.8, 18.79, 18.75, 18.65, 17.1, 14.6, 13.1, 12.1.

HRMS (ESI positive): *m/z* calcd. for C<sub>46</sub>H<sub>60</sub>BF<sub>2</sub>N<sub>4</sub>OPd [M-Cl]<sup>+</sup> 839.38631, found 839.38840, calcd. for C<sub>48</sub>H<sub>63</sub>BF<sub>2</sub>N<sub>5</sub>OPd [M-Cl+CH<sub>3</sub>CN]<sup>+</sup> 880.41286, found 880.41527.

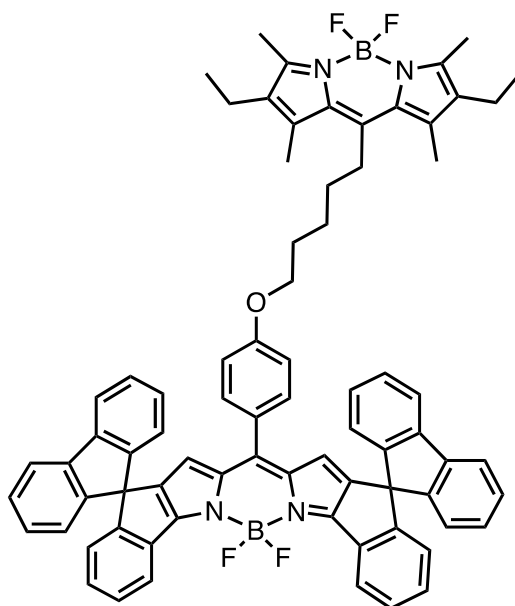

**Synthesis of 12.** General Procedure B: Bodipy **10** (153 mg, 0.2 mmol, 1 eq.), Bodipy **11** (136 mg, 0.3 mmol, 1.5 eq.), K<sub>2</sub>CO<sub>3</sub> (55 mg, 0.4 mmol, 2 eq.), KI (100 mg, 0.6 mmol, 4 eq.) were placed in 10 mL round flask and dissolved in dry acetone (4.0 mL). The crude red product was purified by column chromatography (EtOAc/cyclohexane = 1/4) and gave **12** (110 mg, 49%) as a dark red powder.

<sup>1</sup>H NMR (CDCl<sub>3</sub>, 500 MHz):  $\delta$  / ppm = 8.52 (d,  $J$  = 7.7 Hz, 2H), 7.82 (d,  $J$  = 7.8 Hz, 4H), 7.53 (td,  $J$  = 7.6, 1.1 Hz, 2H), 7.40 (td,  $J$  = 7.5, 1.1 Hz, 4H), 7.35 – 7.29 (m, 2H), 7.23 (dd,  $J$  = 7.5, 1.2 Hz, 2H), 7.19 (td,  $J$  = 7.5, 1.2 Hz, 4H), 6.98 (d,  $J$  = 7.6 Hz, 4H), 6.80 – 6.75 (m, 2H), 6.66 (d,  $J$  = 7.7 Hz, 2H), 6.25 (s, 2H), 3.89 (t,  $J$  = 6.2 Hz, 2H), 2.98 (t,  $J$  = 7.8 Hz, 2H), 2.49 (s, 6H), 2.34 (p,  $J$  = 7.7 Hz, 4H), 2.29 (s, 6H), 1.80 (q,  $J$  = 6.3 Hz, 2H), 1.64 (t,  $J$  = 6.1 Hz, 3H), 0.97 (t,  $J$  = 7.6 Hz, 6H).

<sup>13</sup>C NMR (126 MHz, CDCl<sub>3</sub>):  $\delta$  / ppm = 161.3, 160.4, 156.6, 152.1, 148.3, 144.4, 142.9, 142.1, 141.3, 141.1, 135.6, 132.6, 132.0, 130.8, 130.4, 128.8, 128.0, 127.9, 126.5, 124.3, 124.2, 124.2, 120.6, 120.0, 114.1, 67.4, 59.8, 53.4, 31.2, 28.7, 28.4, 26.5, 17.1, 14.8, 13.3, 12.4.

HRMS (ESI):  $m/z$  calcd. for C<sub>75</sub>H<sub>63</sub>B<sub>2</sub>F<sub>4</sub>N<sub>4</sub>O [M+H]<sup>+</sup> 1133.51241, found 1133.51382, calcd. for C<sub>75</sub>H<sub>62</sub>B<sub>2</sub>F<sub>3</sub>N<sub>4</sub>O [M-F]<sup>+</sup> 1113.50618, found 1113.50802, calcd. for C<sub>75</sub>H<sub>62</sub>B<sub>2</sub>F<sub>4</sub>N<sub>4</sub>NaO [M+Na]<sup>+</sup> 1155.49436, found 1155.49631.

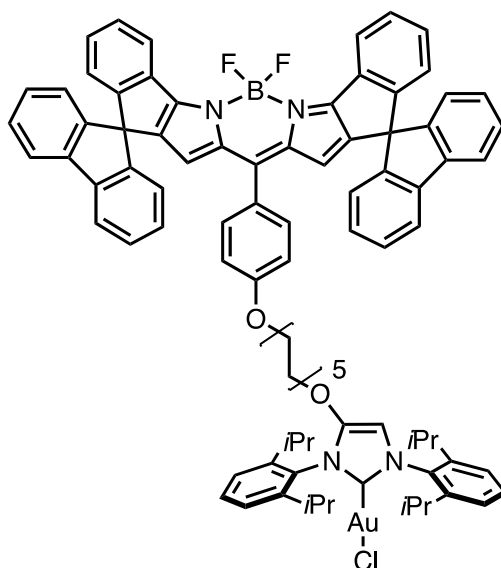

**Synthesis of [AuCl(NHC\_red)].** General Procedure C: Imidazolium salt **5-HBr** (83 mg, 0.06 mmol, 1 eq.),  $K_2CO_3$  (25 mg, 0.18 mmol, 3 eq.),  $[AuCl(SMe_2)]$  (17.7 mg, 0.06 mmol, 1 eq.) were placed in dried 5 mL Schlenk flask and dissolved in dry acetone (2.0 mL). The crude red product was purified by column chromatography (EtOAc/cyclohexane = 1/5) and gave  $[AuCl(NHC\_red)]$  (54 mg, 59%) as a microcrystalline dark red powder.

$^1H$  NMR (500 MHz,  $CD_2Cl_2$ ):  $\delta$  / ppm = 8.48 (d,  $J$  = 7.7 Hz, 2H), 7.87 (dd,  $J$  = 7.6, 1.0 Hz, 4H), 7.62 – 7.51 (m, 4H), 7.42 (td,  $J$  = 7.5, 1.1 Hz, 4H), 7.39 – 7.31 (m, 6H), 7.28 (td,  $J$  = 7.6, 1.1 Hz, 2H), 7.21 (td,  $J$  = 7.5, 1.1 Hz, 4H), 6.98 (d,  $J$  = 7.6 Hz, 4H), 6.82 – 6.77 (m, 2H), 6.67 (d,  $J$  = 7.7 Hz, 2H), 6.47 (s, 1H), 6.31 (s, 2H), 4.02 (t,  $J$  = 6.5 Hz, 2H), 3.87 (t,  $J$  = 6.5 Hz, 2H), 2.72 (h,  $J$  = 6.7 Hz, 2H), 2.63 (h,  $J$  = 6.9 Hz, 2H), 1.73 – 1.64 (m, 4H), 1.37 (dd,  $J$  = 13.1, 6.9 Hz, 12H), 1.34 – 1.25 (m, 12H), 1.23 (q,  $J$  = 5.7, 5.1 Hz, 12H).

$^{13}C$  NMR (126 MHz,  $CD_2Cl_2$ )  $\delta$  / ppm = 179.4 ( $C_{NHC}$ ), 161.1, 160.8, 156.8, 148.5, 148.1, 146.4, 145.9, 143.0, 142.5, 141.4, 141.0, 134.7, 132.6, 132.00, 130.55, 130.47, 130.44, 130.36, 128.7, 128.0, 127.9, 126.1, 124.15, 124.12, 124.04, 123.98, 120.6, 120.1, 114.2, 99.2, 72.8, 68.2, 59.8, 29.26, 29.22, 29.20, 29.00, 28.99, 28.70, 28.58, 25.8, 25.6, 24.4, 23.86, 23.84, 23.3, 0.8.

HRMS (ESI positive):  $m/z$  calcd. For  $C_{90}H_{86}BF_2N_4O_2$ : 1303.68064  $[M-AuCl]^+$ ; found 1303.68222.

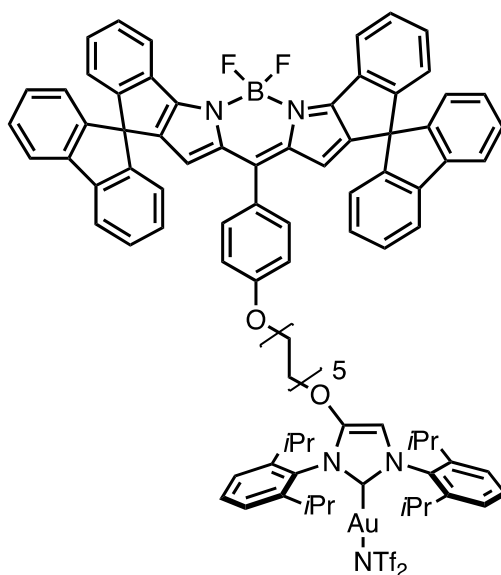

**Synthesis of 14.** A mixture of [AuCl(NHC\_red)] complex (20 mg, 0.013 mmol, 1.0 eq.) and Ag(NTf<sub>2</sub>) (5.4 mg, 0.014 mmol, 1.05 eq.) were dissolved in dry CH<sub>2</sub>Cl<sub>2</sub> (1.5 mL), and reaction mixture was stirred for 30 min in the dark at rt under nitrogen atmosphere. The mixture was filtered *via* celite, and the filtrate was evaporated on the rotavap under reduced pressure. The crude material was rinsed with pentane (1 mL), dried *in high vacuum* and gave **14** (22 mg, 95%) as a dark red solid.

<sup>1</sup>H NMR (500 MHz, CD<sub>2</sub>Cl<sub>2</sub>): δ / ppm = 8.49 (d, *J* = 7.7 Hz, 2H), 7.87 (d, *J* = 7.6 Hz, 4H), 7.57 (qd, *J* = 7.8, 1.7 Hz, 4H), 7.42 (td, *J* = 7.6, 1.1 Hz, 4H), 7.35 (dd, *J* = 7.9, 6.1 Hz, 6H), 7.28 (td, *J* = 7.5, 1.1 Hz, 2H), 7.21 (td, *J* = 7.6, 1.1 Hz, 4H), 6.99 (d, *J* = 7.6 Hz, 4H), 6.79 (d, *J* = 8.5 Hz, 2H), 6.67 (d, *J* = 7.7 Hz, 2H), 6.57 (s, 1H), 6.31 (s, 2H), 4.06 (t, *J* = 6.5 Hz, 2H), 3.86 (t, *J* = 6.5 Hz, 2H), 2.64 (p, *J* = 6.8 Hz, 2H), 2.56 (h, *J* = 6.8 Hz, 2H), 1.75 – 1.66 (m, 4H), 1.34 (dd, *J* = 11.3, 6.9 Hz, 14H), 1.29 (d, *J* = 6.9 Hz, 10H), 1.23 (d, *J* = 6.9 Hz, 12H).

<sup>13</sup>C NMR (126 MHz, CD<sub>2</sub>Cl<sub>2</sub>) δ / ppm = 162.0, 161.1, 160.8, 156.8, 149.0, 148.1, 146.3, 145.9, 142.9, 142.5, 141.4, 141.0, 134.4, 132.6, 132.0, 130.7, 130.6, 130.5, 130.1, 128.7, 128.0, 127.9, 126.1, 124.16, 124.10, 124.03, 123.98, 120.6, 120.1, 117.6, 114.2, 100.0, 73.0, 68.2, 59.8, 29.36, 29.28, 29.23, 29.21, 29.08, 29.01, 28.99, 28.77, 28.58, 25.8, 25.6, 24.1, 23.9, 23.6, 23.3.

High-resolution mass could not be obtained for this complex.

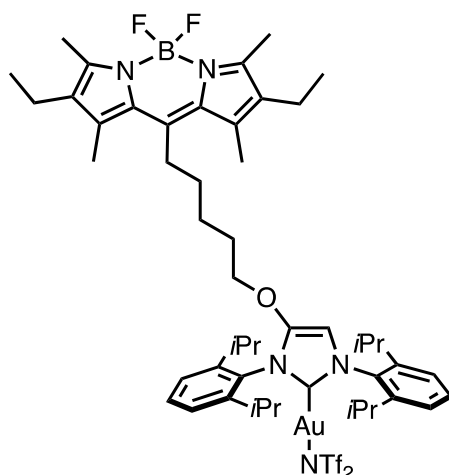

**Synthesis of [Au(NTf<sub>2</sub>)(NHC\_green)].**<sup>[5]</sup> A mixture of [AuCl(NHC\_green)]<sup>[5]</sup> complex (13 mg, 0.013 mmol, 1.0 eq.), and Ag(NTf<sub>2</sub>) (5.4 mg, 0.014 mmol, 1.05 eq.) were dissolved in dry CH<sub>2</sub>Cl<sub>2</sub> (1.0 mL), and reaction mixture was stirred for 30 min in the dark at rt under nitrogen atmosphere. The mixture was filtered through a celite plug, and the filtrate evaporated on the rotavap under reduced pressure. The crude material was rinsed with pentane (1 mL), dried *in high vacuum* and gave [Au(NTf<sub>2</sub>)(NHC\_green)] (15 mg, 91%) as an orange solid.

<sup>1</sup>H NMR (500 MHz, CD<sub>2</sub>Cl<sub>2</sub>): δ / ppm = 7.55 (dt, *J* = 11.5, 7.8 Hz, 2H), 7.35 (t, *J* = 8.4 Hz, 4H), 6.60 (s, 1H), 4.11 (t, *J* = 6.3 Hz, 2H), 2.96 (dd, *J* = 10.7, 5.8 Hz, 2H), 2.58 (dt, *J* = 13.8, 7.2 Hz, 2H), 2.49 (s, 3H), 2.45 (q, *J* = 7.5 Hz, 6H), 2.29 (s, 6H), 1.82 (p, *J* = 6.6 Hz, 2H), 1.63 – 1.53 (m, 4H), 1.35 (d, *J* = 6.9 Hz, 6H), 1.33 (d, *J* = 6.8 Hz, 6H), 1.29 (d, *J* = 6.9 Hz, 6H), 1.24 (d, *J* = 6.9 Hz, 6H), 1.09 (t, *J* = 7.6 Hz, 6H).

<sup>13</sup>C NMR (126 MHz, CD<sub>2</sub>Cl<sub>2</sub>) δ / ppm = 162.2, 152.1, 148.8, 146.2, 145.9, 144.3, 135.8, 134.4, 132.8, 130.7, 130.6, 130.0, 124.1, 124.0, 122.7, 120.2, 117.6, 115.0, 100.1, 72.6, 31.3, 29.7, 29.1, 28.8, 28.7, 28.2, 26.31, 24.1, 23.9, 23.6, 23.3, 17.1, 14.6, 13.2, 12.2.

High-resolution mass could not be obtained for this complex.



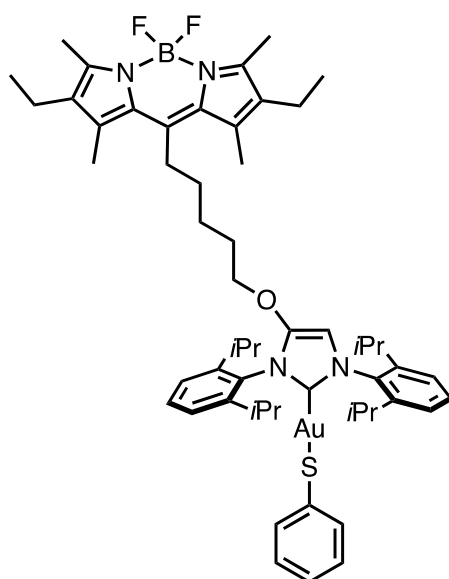

**Synthesis of 15.** To a solution of  $[\text{AuCl}(\text{NHC\_green})]^{[5]}$  (51.4 mg, 0.041 mmol) in dry EtOH (2.5 mL) and dry  $\text{CH}_2\text{Cl}_2$  (1.5 mL), were added thiophenol (30  $\mu\text{L}$ , 0.28 mmol) and  $\text{Et}_3\text{N}$  (30  $\mu\text{L}$ , 0.21 mmol), and the resulting mixture was stirred for 30 min (open vessel). After evaporation of the solvent on the rotavap under reduced pressure, the residue was purified by dissolution/precipitation using  $\text{CH}_2\text{Cl}_2$  and pentane to afford **15** as an orange solid (44.4 mg, 0.042 mmol, 82%).

$^1\text{H}$  NMR (500 MHz,  $\text{CD}_2\text{Cl}_2$ ):  $\delta$  / ppm = 7.59 (td,  $J$  = 7.8, 5.2 Hz, 2H), 7.38 (dd,  $J$  = 7.8, 4.9 Hz, 4H), 6.78 (s, 5H), 6.53 (s, 1H), 4.09 (t,  $J$  = 6.3 Hz, 2H), 3.01 – 2.94 (m, 2H), 2.74 (dp,  $J$  = 31.2, 6.9 Hz, 4H), 2.49 (s, 6H), 2.44 (t,  $J$  = 7.6 Hz, 4H), 2.30 (s, 6H), 1.81 (p,  $J$  = 6.5 Hz, 2H), 1.66 – 1.58 (m, 2H), 1.52 (d,  $J$  = 7.4 Hz, 2H), 1.37 (dd,  $J$  = 11.0, 6.8 Hz, 12H), 1.27 (dd,  $J$  = 23.2, 6.9 Hz, 12H), 1.09 (t,  $J$  = 7.5 Hz, 6H).

$^{13}\text{C}$  NMR (126 MHz,  $\text{CD}_2\text{Cl}_2$ )  $\delta$  / ppm = 181.0 ( $\text{C}_{\text{NHC}}$ ), 152.1, 148.6, 146.5, 146.1, 144.40, 144.35, 135.8, 134.9, 132.8, 131.3, 130.7, 130.6, 130.5, 130.4, 127.2, 124.2, 124.0, 121.6, 99.2, 72.4, 53.9, 53.6, 53.4, 53.2, 53.0, 31.3, 29.1, 28.8, 28.7, 28.2, 26.3, 24.3, 23.91, 23.84, 23.4, 17.1, 14.6, 13.2, 12.17, 12.15, 12.12.

HRMS (ESI positive):  $m/z$  calcd.  $\text{C}_{55}\text{H}_{73}\text{AuBF}_2\text{N}_4\text{OS}$ : 1083.52264  $[\text{M}+\text{H}]^+$ ; found 1083.52334.

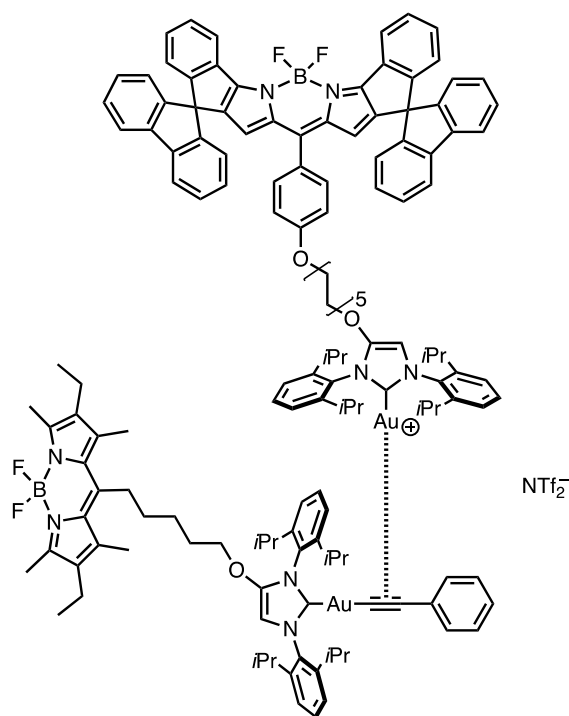

**Synthesis of 16.** A solution of **13** (16.4 mg, 0.015 mmol, 1 eq.) and **14** (27.1 mg, 0.015 mmol, 1 eq.) in dry  $\text{CH}_2\text{Cl}_2$  (1.5 mL) was stirred for 40 min in the dark. After the solvent was evaporated on the rotavap under reduced pressure, the resulting solid was rinsed with  $\text{Et}_2\text{O}$  (ca. 1 mL) and pentane (ca. 1.5 mL) and dried in high vacuum to give a dark violet solid **16** (34.6 mg, 0.012 mmol, 80%).

$^1\text{H}$  NMR (500 MHz,  $\text{CD}_2\text{Cl}_2$ ):  $\delta$  / ppm = 8.48 (d,  $J = 7.7$  Hz, 2H), 7.86 (d,  $J = 7.6$  Hz, 4H), 7.62 – 7.45 (m, 6H), 7.44 – 7.34 (m, 7H), 7.31 – 7.24 (m, 9H), 7.21 (tt,  $J = 7.5$ , 1.3 Hz, 5H), 7.15 – 7.09 (m, 2H), 6.98 (d,  $J = 7.6$  Hz, 4H), 6.79 (dd,  $J = 8.6$ , 2.4 Hz, 2H), 6.74 – 6.69 (m, 2H), 6.67 (d,  $J = 7.7$  Hz, 2H), 6.50 (d,  $J = 19.6$  Hz, 2H), 6.31 (d,  $J = 1.8$  Hz, 2H), 4.06 (t,  $J = 6.3$  Hz, 2H), 4.00 (t,  $J = 6.5$  Hz, 2H), 3.86 (td,  $J = 6.6$ , 2.1 Hz, 2H), 3.44 (q,  $J = 7.3$  Hz, 1H), 2.97 – 2.91 (m, 2H), 2.69 – 2.55 (m, 4H), 2.49 (s, 9H), 2.45 (q,  $J = 7.6$  Hz, 4H), 2.28 (s, 6H), 1.77 (p,  $J = 6.5$  Hz, 2H), 1.68 (dt,  $J = 14.2$ , 6.7 Hz, 4H), 1.52 (d,  $J = 7.2$  Hz, 4H), 1.45 – 1.27 (m, 14H), 1.24 (dd,  $J = 7.0$ , 3.0 Hz, 16H), 1.18 (dd,  $J = 6.9$ , 2.2 Hz, 12H), 1.15 – 1.07 (m, 24H).

$^{13}\text{C}$  NMR (126 MHz,  $\text{CD}_2\text{Cl}_2$ )  $\delta$  / ppm = 177.1 ( $\text{C}_{\text{NHC}}$ ), 160.8, 156.8, 152.1, 148.9, 148.7, 148.1, 146.2, 146.1, 145.7, 142.9, 141.4, 141.0, 135.8, 134.3, 132.8, 132.5, 132.0, 131.7, 130.7, 130.5, 130.0, 129.4, 128.7, 128.3, 128.0, 127.9, 126.1, 124.23, 124.15, 124.04, 123.98, 121.2, 120.6, 120.1, 118.7, 114.2, 100.25, 100.16, 73.1, 72.8, 68.2, 59.8, 31.2, 29.26, 29.21, 28.97, 28.93, 28.71, 28.66, 28.53, 28.23, 26.3, 25.8, 25.5, 24.5, 23.9, 23.8, 23.29, 23.27, 22.3, 17.1, 14.6, 13.8, 13.2, 12.2, 7.3.



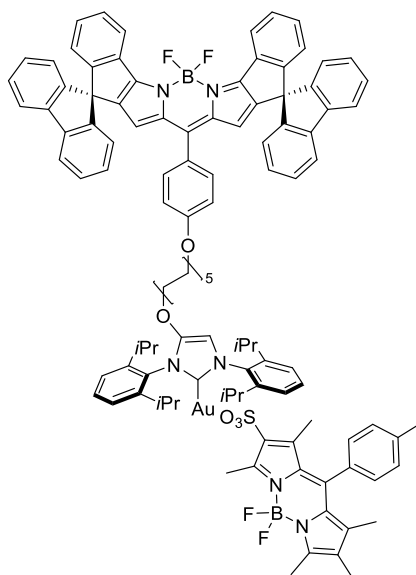

**Synthesis of 18.** In 25 mL round flask **14** (6.15 mg, 4.0· $\mu$ mol) was dissolved in  $\text{CH}_2\text{Cl}_2$  (10 mL) and a solution of  $[\text{Ag}(\text{bdpSO}_3)]$  (2.22 mg, 4.0· $\mu$ mol) in acetonitrile (5 mL) was added. The  $\text{AgCl}$  precipitate formed immediately was separated by filtration through celite. The celite was washed with dichloromethane (10 mL) to extract the product completely. The combined filtrates were evaporated and dried overnight in high vacuum. Yield: 7.8 mg (99 %).

$^1\text{H}$  NMR (500 MHz,  $\text{CD}_2\text{Cl}_2$ )  $\delta$  / ppm = 8.44 (d,  $J$  = 7.6 Hz, 2H), 7.83 (d,  $J$  = 7.6 Hz, 4H), 7.53 (t,  $J$  = 7.5 Hz, 2H), 7.49 – 7.45 (m, 2H), 7.38 (t,  $J$  = 7.5 Hz, 4H), 7.32 (d,  $J$  = 8.0 Hz, 4H), 7.29 – 7.22 (m, 6H), 7.17 (t,  $J$  = 7.5 Hz, 4H), 7.11 (d,  $J$  = 7.5 Hz, 2H), 6.94 (d,  $J$  = 7.6 Hz, 4H), 6.75 (d,  $J$  = 8.4 Hz, 2H), 6.63 (d,  $J$  = 7.7 Hz, 2H), 6.46 (s, 1H), 6.27 (s, 2H), 3.97 (t,  $J$  = 6.4 Hz, 2H), 3.83 (t,  $J$  = 6.4 Hz, 2H), 2.60 – 2.39 (m, 12H), 2.33 (q,  $J$  = 7.2 Hz, 2H), 1.68 – 1.61 (m, 4H), 1.34 – 1.13 (m, 42H), 0.99 (t,  $J$  = 7.5 Hz, 3H).

$^{13}\text{C}$  NMR (126 MHz,  $\text{CD}_2\text{Cl}_2$ )  $\delta$  / ppm = 161.69 (d,  $J$  = 4.4 Hz), 161.3, 159.2, 158.6, 157.4, 149.3, 148.7, 146.8, 146.4, 143.5, 143.0, 141.9, 141.6, 139.8, 139.7, 135.6, 135.1, 133.1, 132.6, 131.3, 131.2, 131.1, 131.0, 130.7, 130.4, 130.3, 129.5, 129.3, 128.62, 128.55, 128.47, 126.7, 124.80, 124.72, 124.66, 124.55, 121.2, 120.7, 114.7, 100.3, 73.4, 68.7, 60.3, 29.84, 29.79, 29.77, 29.73, 29.61, 29.55, 29.31, 29.25, 29.12, 26.4, 26.1, 24.9, 24.5, 24.3, 24.0, 21.8, 17.6, 14.7, 14.0, 13.3, 13.1, 12.4.

$^{19}\text{F}$  NMR (471 MHz,  $\text{CD}_2\text{Cl}_2$ )  $\delta$  / ppm = -144, 26 (q,  $J(^{11}\text{B}-^{19}\text{F})$  = 33 Hz) (green Bodipy), -146.43 (q,  $J(^{11}\text{B}-^{19}\text{F})$  = 33 Hz) (red Bodipy).

HRMS (ESI positive):  $m/z$  calcd. for  $C_{90}H_{85}AuBF_2N_4O_2$ : 1499.63992  $[M+H]^+$ ; found 1499.64152. HRMS (ESI negative):  $m/z$  calcd. for  $C_{22}H_{24}BF_2N_2O_3S$ : 445.1569  $[M-H]^-$ ; found 445.1570.

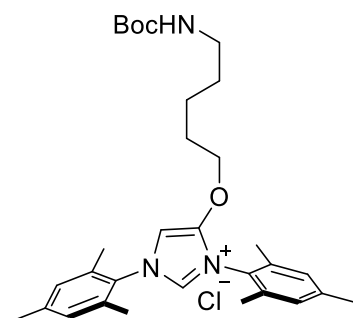

**Synthesis of IMes-HCl.** General Procedure B: BocNH(CH<sub>2</sub>)<sub>5</sub>OTs (90 mg, 0.25 mmol, 1.2 eq.), 4-hydroxy-1,3-dimesityl-1H-imidazol-3-ium chloride (75 mg, 0.21 mmol, 1.0 eq.), K<sub>2</sub>CO<sub>3</sub> (29 mg, 0.21 mmol, 1.0 eq.), KI (105 mg, 0.63 mmol, 3 eq) were placed in a dried 5 mL Schlenk flask and dissolved in dry acetone (3 mL). The crude product was purified by column chromatography (MeOH/CH<sub>2</sub>Cl<sub>2</sub> = 1/15) and gave IMes-HCl (55 mg, 48%) as a white powder.

<sup>1</sup>H NMR (300 MHz, CDCl<sub>3</sub>)  $\delta$  / ppm = 9.28 (s, 1H), 7.30 (s, 1H), 7.02 (d,  $J$  = 10.4 Hz, 4H), 4.57 (s, 1H), 4.32 (t,  $J$  = 6.5 Hz, 2H), 3.03 (q,  $J$  = 6.7 Hz, 2H), 2.34 (d,  $J$  = 8.7 Hz, 6H), 2.22 (s, 6H), 2.14 (s, 6H), 1.84 – 1.60 (m, 3H), 1.50 – 1.14 (m, 12H).

<sup>13</sup>C NMR (75 MHz, CDCl<sub>3</sub>)  $\delta$  / ppm = 156.2, 147.7, 141.7, 141.5, 134.9, 134.2, 131.3, 130.9, 130.1, 126.8, 102.2, 74.9, 29.6, 28.5, 28.0, 22.7, 21.3, 18.0.

HRMS (ESI positive):  $m/z$  calcd. for  $C_{31}H_{44}N_3O_3$ : 506.33772  $[M-Cl]^+$ ; found 506.33840.

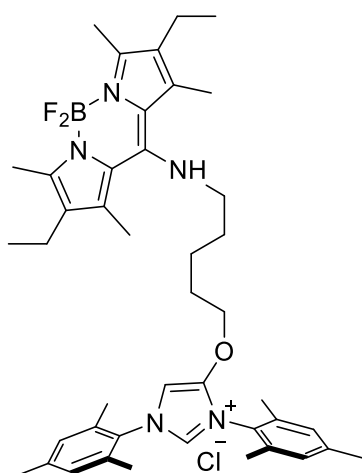

**Synthesis of 19.** The imidazolium salt (40 mg, 0.074 mmol) was dissolved in freshly distilled  $\text{CH}_2\text{Cl}_2$  (2 mL) in a dried 10 mL Schlenk flask, cooled to  $0^\circ\text{C}$  and treated with a solution of HCl in dioxane (4M, 28  $\mu\text{L}$ , 0.11 mmol, 1.5 eq) and stirred at rt for 15 h under nitrogen atmosphere. The volatiles was evaporated on the rotavap under reduced pressure,  $\text{Et}_3\text{N}$  (17.5  $\mu\text{L}$ , 0.11 mmol, 1.7 eq) and *meso*-Cl Bodipy<sup>[3]</sup> (25 mg, 0.074 mmol) were added to the crude product, and the mixture dissolved in  $\text{CH}_2\text{Cl}_2:\text{CH}_3\text{CN}$  (1:1) (2 mL). The solution was stirred for 15 h at rt. Removal of the solvent on the rotavap under reduced pressure and purification of the residue by silica gel column chromatography ( $\text{CH}_2\text{Cl}_2/\text{MeOH} = 1/1$ ) as an eluent provides **19** as a yellow solid. Yield: 27 mg (49%).

$^1\text{H}$  NMR (500 MHz,  $\text{CDCl}_3$ )  $\delta$  / ppm = 9.26 (d,  $J = 1.7$  Hz, 1H), 7.56 (d,  $J = 1.8$  Hz, 1H), 7.00 (s, 4H), 5.39 (t,  $J = 5.3$  Hz, 1H), 4.31 (t,  $J = 6.6$  Hz, 2H), 3.47 (q,  $J = 6.3$  Hz, 2H), 2.42 (s, 6H), 2.40 – 2.37 (m, 4H), 2.32 (d,  $J = 2.2$  Hz, 6H), 2.26 (s, 6H), 2.20 (s, 6H), 2.09 (s, 6H), 1.71 – 1.64 (m, 6H), 1.37 – 1.31 (m, 2H), 1.03 (t,  $J = 7.5$  Hz, 6H).

$^{13}\text{C}$  NMR (126 MHz,  $\text{CDCl}_3$ )  $\delta$  / ppm = 151.4, 147.5, 145.0, 141.5, 141.3, 134.8, 134.1, 131.3, 131.0, 129.9, 129.8, 129.6, 128.6, 126.9, 122.7, 102.6, 74.3, 52.1, 31.7, 27.9, 22.5, 21.20, 21.16, 17.6, 17.2, 15.1, 13.2, 12.0.

$^{19}\text{F}$  NMR (471 MHz,  $\text{CDCl}_3$ )  $\delta$  / ppm = -144.43 (q,  $J(^{11}\text{B}-^{19}\text{F}) = 33$  Hz).

HRMS (ESI positive):  $m/z$  calcd. for  $\text{C}_{43}\text{H}_{57}\text{BF}_2\text{N}_5\text{O}$ : 708.46310  $[\text{M}-\text{Cl}]^+$ ; found 708.46187.

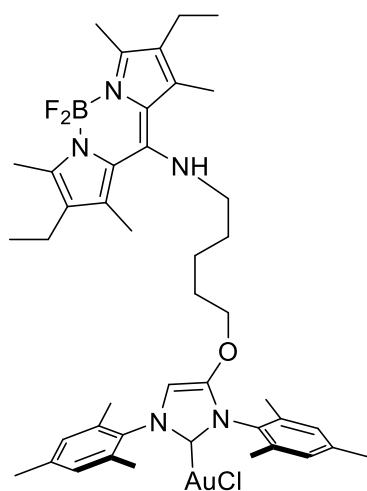

**Synthesis of 20.** General Procedure C: To a 5 mL dried Schlenk flask equipped with a stirring bar containing **19** (15 mg, 0.02 mmol, 1.0 eq) and Ag<sub>2</sub>O (2.3 mg, 0.01 mmol, 0.5 eq) under a flow of the nitrogen gas, dry 1,2-dichloroethane (2 mL) was added and the flask was sealed. After stirring in the dark for 90 min at 55 °C, [AuCl(SMe<sub>2</sub>)] (5.9 mg, 0.02 mmol, 1.0 eq) was added and the mixture was stirred for an additional 2 h at 60 °C. The resulting suspension was filtered through a short celite plug. The filtrate was collected and evaporated on the rotavap under reduced pressure. The product was purified by column chromatography (CH<sub>2</sub>Cl<sub>2</sub>) obtaining the product as a yellow solid. Yield: 9.6 mg (51%).

<sup>1</sup>H NMR (500 MHz, CDCl<sub>3</sub>) δ / ppm = 6.95 (d, *J* = 7.0 Hz, 4H), 6.30 (s, 1H), 5.18 (t, *J* = 5.7 Hz, 1H), 3.88 (t, *J* = 6.3 Hz, 2H), 3.42 (q, *J* = 6.6 Hz, 2H), 2.45 (s, 6H), 2.40 (q, *J* = 7.6 Hz, 4H), 2.32 (d, *J* = 7.0 Hz, 6H), 2.24 (s, 6H), 2.12 (s, 6H), 2.06 (s, 6H), 1.64 – 1.57 (m, 4H), 1.31 – 1.25 (m, 4H), 1.04 (t, *J* = 7.5 Hz, 6H).

<sup>13</sup>C NMR (126 MHz, CDCl<sub>3</sub>) δ / ppm = 168.2 (C<sub>NHC</sub>), 151.3, 147.7, 145.7, 139.79, 139.75, 135.42, 135.39, 134.9, 131.1, 129.9, 129.55, 129.47, 128.7, 98.8, 72.6, 52.3, 32.0, 28.2, 22.9, 21.34, 21.27, 18.0, 17.8, 17.3, 15.2, 13.2, 12.2.

<sup>19</sup>F NMR (471 MHz, CDCl<sub>3</sub>) δ / ppm = -145.17 (q, *J*(<sup>11</sup>B-<sup>19</sup>F) = 28 Hz).

HRMS (ESI negative): *m/z* calcd. for C<sub>43</sub>H<sub>55</sub>AuBClF<sub>2</sub>N<sub>5</sub>O: 938.38274 [M-H]<sup>-</sup>; found 938.38084.

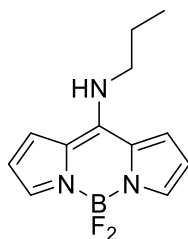

**Synthesis of B1.** General Procedure D:

<sup>1</sup>H NMR (500 MHz, CDCl<sub>3</sub>)  $\delta$  / ppm = 7.68 (s, 1H), 7.44 (s, 1H), 7.09 (s, 1H), 6.80 (s, 1H), 6.58 (s, 1H), 6.51 (s, 1H), 6.29 (s, 1H), 3.50 (q,  $J$  = 6.5 Hz, 3H), 1.81 (h,  $J$  = 7.3 Hz, 3H), 1.08 (t,  $J$  = 7.4 Hz, 4H).

<sup>13</sup>C NMR (126 MHz, CDCl<sub>3</sub>)  $\delta$  / ppm = 148.3, 135.0, 132.2, 125.0, 123.9, 122.4, 114.9, 114.7, 113.8, 49.0, 22.3, 11.5.

HRMS (ESI positive):  $m/z$  calcd. for C<sub>12</sub>H<sub>15</sub>BF<sub>2</sub>N<sub>3</sub>: 250.13216 [M+H]<sup>+</sup>; found 250.13233. Yield: 108 mg (87%).

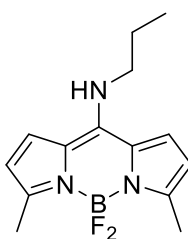

**Synthesis of B2.** General Procedure D:

<sup>1</sup>H NMR (500 MHz, CDCl<sub>3</sub>)  $\delta$  / ppm = 6.83 (s, 2H), 6.13 (s, 2H), 6.02 (s, 1H), 3.41 (q,  $J$  = 6.5 Hz, 2H), 2.56 (s, 5H), 1.75 (h,  $J$  = 7.3 Hz, 2H), 1.04 (t,  $J$  = 7.4 Hz, 3H).

<sup>13</sup>C NMR (126 MHz, CDCl<sub>3</sub>)  $\delta$  / ppm = 147.5, 145.8, 123.3, 114.9, 48.8, 29.8, 22.6, 14.2, 11.5.

HRMS (ESI positive):  $m/z$  calcd. for C<sub>14</sub>H<sub>19</sub>BF<sub>2</sub>N<sub>3</sub>: 278.16346 [M+H]<sup>+</sup>; found 278.16357. Yield: 118 mg (85%).



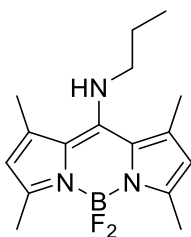

**Synthesis of B3.** General Procedure D:

$^1\text{H}$  NMR (500 MHz,  $\text{CDCl}_3$ )  $\delta$  / ppm = 6.01 (s, 2H), 5.46 (s, 1H), 3.50 (q,  $J$  = 6.4 Hz, 2H), 2.50 (s, 6H), 2.36 (s, 6H), 1.70 (h,  $J$  = 7.2 Hz, 2H), 0.98 (t,  $J$  = 7.4 Hz, 3H).

$^{13}\text{C}$  NMR (126 MHz,  $\text{CDCl}_3$ )  $\delta$  / ppm = 152.3, 147.4, 131.8, 123.2, 118.2, 54.4, 25.7, 15.7, 14.3, 11.3.

HRMS (ESI positive):  $m/z$  calcd. for  $\text{C}_{16}\text{H}_{23}\text{BF}_2\text{N}_3$ : 306.19476  $[\text{M}+\text{H}]^+$ ; found 306.19482. Yield: 113 mg (74%).

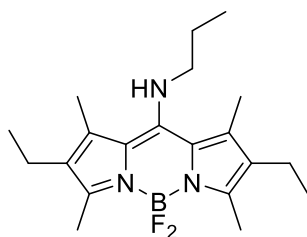

**Synthesis of B4.** General Procedure D:

$^1\text{H}$  NMR (500 MHz,  $\text{CDCl}_3$ )  $\delta$  / ppm = 5.38 (s, 1H), 3.47 (q,  $J$  = 6.3 Hz, 3H), 2.47 (s, 6H), 2.42 (q,  $J$  = 7.5 Hz, 4H), 2.29 (s, 6H), 1.69 (h,  $J$  = 7.2 Hz, 2H), 1.05 (t,  $J$  = 7.5 Hz, 6H), 0.97 (t,  $J$  = 7.3 Hz, 3H).

$^{13}\text{C}$  NMR (126 MHz,  $\text{CDCl}_3$ )  $\delta$  / ppm = 151.5, 145.2, 129.7, 128.6, 122.9, 54.5, 25.7, 17.3, 15.2, 13.3, 12.2, 11.4.

HRMS (ESI positive):  $m/z$  calcd. for  $\text{C}_{20}\text{H}_{31}\text{BF}_2\text{N}_3$ : 362.25736  $[\text{M}+\text{H}]^+$ ; found 362.25743. Yield: 137 mg (76%).

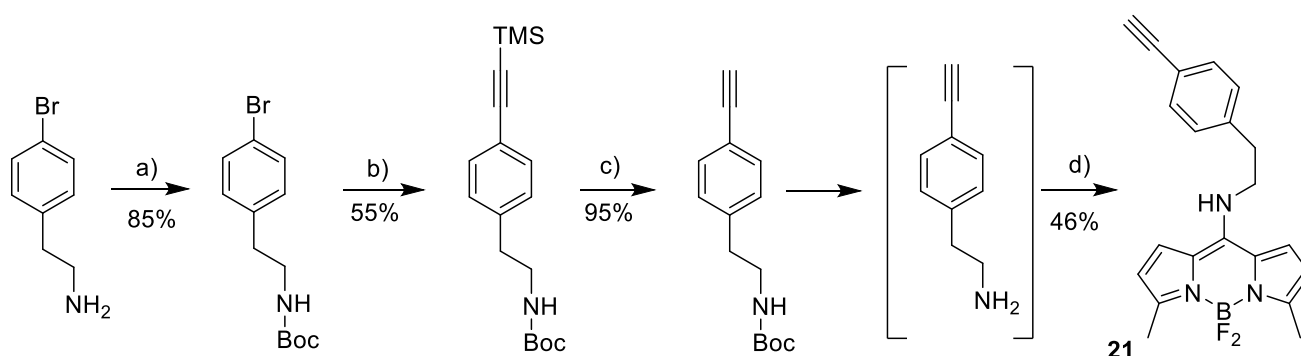

**Scheme S 1** Synthesis of blue Bodipy acetylene **21**. Reagents and conditions: a)  $\text{Et}_3\text{N}$ ,  $\text{Boc}_2\text{O}$ ,  $\text{CH}_2\text{Cl}_2$ , rt, 3 h; b) TMS-acetylene,  $\text{CuI}$ ,  $[\text{PdCl}_2(\text{PPh}_3)_2]$ ,  $\text{HNiPr}_2$ , rt, 24 h; c) TBAF, THF, rt, 60 min. d) TFA,  $\text{CH}_2\text{Cl}_2$ ,  $0^\circ\text{C}$ , 60 min; then 8-SMe Bodipy<sup>[4]</sup>,  $\text{Et}_3\text{N}$ ,  $\text{CH}_2\text{Cl}_2/\text{ACN}$ , rt, 24 h.

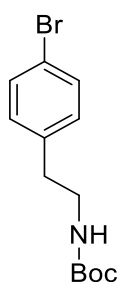

**Synthesis of *tert*-butyl (4-bromophenethyl)carbamate.** 2-(4-Bromophenyl)ethan-1-amine (1.0 g, 5 mmol) was dissolved in  $\text{CH}_2\text{Cl}_2$  (20 mL) and treated with  $\text{Et}_3\text{N}$  (1.05 mL, 7.5 mmol) and di-*tert*-butyl dicarbonate (1.43 g, 6.5 mmol). The solution was stirred at rt for 3 h. The reaction mixture was poured into 50 mL of water and washed with  $\text{CH}_2\text{Cl}_2$  (3 x 25 mL). The combined organic layers were washed with water (30 mL) and brine (30 mL), dried over  $\text{MgSO}_4$  and filtered. The filtrate was concentrated in vacuum. The crude product was purified by column chromatography on silica ( $\text{EtOAc}/\text{cyclohexane} = 3/1$ ) to obtain the product as a white solid (1.28 g, 85%).

$^1\text{H}$  NMR (300 MHz,  $\text{CDCl}_3$ )  $\delta$  / ppm = 7.35 (d,  $J = 8.3$  Hz, 2H), 7.00 (d,  $J = 8.3$  Hz, 2H), 4.80 (bs, 1H), 3.28 (q,  $J = 6.5$  Hz, 2H), 2.69 (t,  $J = 7.0$  Hz, 2H), 1.38 (s, 9H).

$^{13}\text{C}$  NMR (75 MHz,  $\text{CDCl}_3$ )  $\delta$  / ppm = 155.9, 138.1, 131.7, 130.6, 120.3, 41.7, 35.7, 28.5.

HRMS (ESI positive):  $m/z$  calcd. for  $\text{C}_{13}\text{H}_{19}\text{BrNO}_2$ : 300.05937  $[\text{M}+\text{H}]^+$ ; found 300.05902.

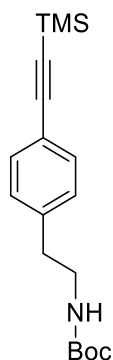

**Synthesis of *tert*-butyl (4-((trimethylsilyl)ethynyl)phenethyl)carbamate.** A solution of *tert*-butyl (4-bromophenethyl) carbamate (500 mg, 1.67 mmol), CuI (29 mg, 0.15 mmol) and dichlorobis(triphenylphosphine)palladium (II) (50 mg, 0.07 mmol) in degassed HNIPr<sub>2</sub> (10 mL) was treated with TMS-acetylene (0.28 mL, 2.0 mmol) under nitrogen atmosphere, and stirred at rt for 3 h. The volatiles were evaporated on the rotavap under reduced pressure, the residue was dissolved in Et<sub>2</sub>O (50 mL) and filtered through a celite plug, and the filtrate was concentrated in vacuum. The crude product was purified by column chromatography (EtOAc/cyclohexane = 1/ 10) to yield *tert*-butyl (4-((trimethylsilyl)ethynyl)phenethyl)carbamate (291 mg, 55%) as a yellow solid.

<sup>1</sup>H NMR (300 MHz, CDCl<sub>3</sub>) δ / ppm = 7.44 – 7.37 (m, 2H), 7.13 (d, *J* = 8.1 Hz, 2H), 4.57 (s, 1H), 3.35 (q, *J* = 6.4 Hz, 2H), 2.79 (t, *J* = 7.0 Hz, 2H), 1.44 (s, 9H), 0.26 (s, 9H).

<sup>13</sup>C NMR (75 MHz, chloroform-*d*) δ / ppm = 155.9, 139.7, 132.3, 128.8, 121.3, 105.1, 94.0, 41.7, 36.2, 28.5, 0.1.

HRMS (ESI positive): *m/z* calcd. for C<sub>18</sub>H<sub>28</sub>NO<sub>2</sub>Si: 318.18838 [M+H]<sup>+</sup>; found 318.18887.

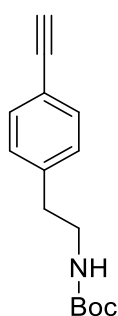

**Synthesis of *tert*-butyl (4-ethynylphenethyl)carbamate.** *Tert*-butyl(4-((trimethylsilyl)ethynyl)phenethyl)carbamate (250 mg, 0.79 mmol) was dissolved in freshly distilled THF (3 mL) and treated with a solution of TBAF in THF (1.58 mL, 1.58 mmol, 1 M in THF) and stirred at rt for 1 h. After evaporation of the solution on the rotavap under reduced pressure, the residue was purified by column chromatography (EtOAc/cyclohexane = 1/3) to yield *tert*-butyl (4-ethynylphenethyl)carbamate (184 mg, 95%) as a yellow oil.

$^1\text{H}$  NMR (500 MHz,  $\text{CDCl}_3$ )  $\delta$  / ppm = 7.44 (d,  $J$  = 8.1 Hz, 2H), 7.16 (d,  $J$  = 7.9 Hz, 2H), 4.60 (s, 1H), 3.37 (q,  $J$  = 7.1 Hz, 2H), 3.07 (s, 1H), 2.81 (t,  $J$  = 6.8 Hz, 2H), 1.44 (s, 9H).

$^{13}\text{C}$  NMR (126 MHz,  $\text{CDCl}_3$ )  $\delta$  / ppm = 156.0, 140.2, 132.5, 129.0, 120.3, 83.7, 79.5, 54.0, 41.7, 36.3, 28.6, 20.9, 14.3.

HRMS (ESI positive):  $m/z$  calcd. for  $\text{C}_{15}\text{H}_{19}\text{NNaO}_2$ : 268.13080  $[\text{M}+\text{Na}]^+$ ; found 268.13092.

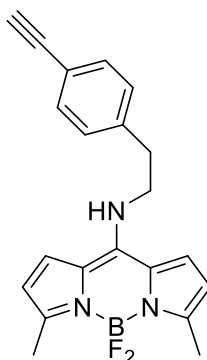

**Synthesis of 21.** *Tert*-butyl (4-ethynylphenethyl)carbamate (100 mg, 0.41 mmol) was dissolved in 3 mL of CH<sub>2</sub>Cl<sub>2</sub>, the reaction mixture was cooled to 0°C and treated with trifluoroacetic acid (200 μL) and stirred at rt for 1 h. The solution was evaporated and to the crude material was added 8-SMe Bodipy<sup>[4]</sup> (110 mg, 0.41 mmol) and Et<sub>3</sub>N (112 μL, 0.8 mmol) in the solvent mixture 1:1 of CH<sub>2</sub>Cl<sub>2</sub> and CH<sub>3</sub>CN (2 mL), and the solution was stirred for 24 h at rt. Solvent removal on the rotavap under reduced pressure and purification by column chromatography on silica using CH<sub>2</sub>Cl<sub>2</sub> as an eluent gave Bodipy **21** as a yellow solid (68 mg, 46%).

<sup>1</sup>H NMR (500 MHz, CDCl<sub>3</sub>) δ / ppm = 7.51 (d, *J* = 7.9 Hz, 2H), 7.21 (d, *J* = 7.8 Hz, 2H), 6.79 (s, 2H), 6.16 (s, 2H), 5.99 (s, 1H), 3.83 (q, *J* = 6.5 Hz, 2H), 3.10 (s, 1H), 3.07 (t, *J* = 6.9 Hz, 2H), 2.56 (s, 6H).

<sup>13</sup>C NMR (126 MHz, CDCl<sub>3</sub>) δ / ppm = 147.9, 145.5, 137.6, 133.1, 128.8, 123.3, 121.6, 115.3, 83.1, 78.0, 47.3, 34.9, 27.1, 14.3.

HRMS (ESI positive): *m/z* calcd. for C<sub>21</sub>H<sub>21</sub>BF<sub>2</sub>N<sub>3</sub>: 364.17911 [M+H]<sup>+</sup>; found 364.17939.

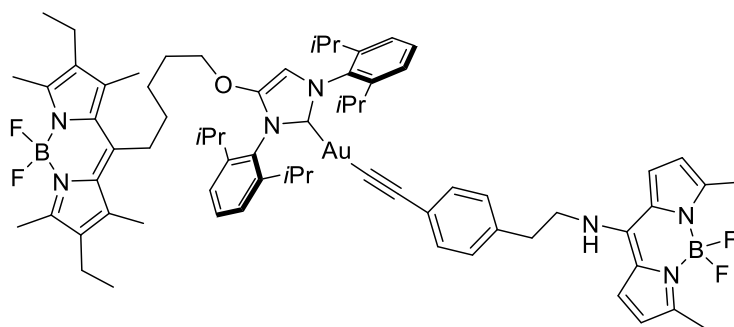

**Synthesis of 22-dbu.** A vial was charged with  $[\text{AuCl}(\text{NHC\_green})]^{[5]}$  (4.0 mg, 0.004 mmol, 1.0 eq) and **21** (1.5 mg, 0.004 mmol, 1.0 eq) and dissolved in a minimum amount of  $\text{CH}_2\text{Cl}_2$  ~200  $\mu\text{L}$ . To the reaction mixture, DBU (3.0  $\mu\text{L}$ , 0.02 mmol, 5.0 eq) was added and the solution stirred at rt for 15 h. The reaction mixture was diluted with  $\text{CH}_2\text{Cl}_2$  (50 mL) and washed two times with brine (50 mL) and two times with water (50 mL). The organic layer was dried over  $\text{MgSO}_4$ , filtered and the volatiles evaporated on the rotavap under reduced pressure. The remaining orange solid **22-dbu** was used in further experiments without additional purification (5.9 mg, 99%).  $^1\text{H}$  NMR (500 MHz,  $\text{CD}_2\text{Cl}_2$ )  $\delta$  / ppm = 7.55 (m, 2H,  $p\text{-H}_{\text{Ar}}$ ), 7.35 (m, 4H,  $m\text{-H}_{\text{Ar}}$ ), 7.23 (d,  $J = 8.0$  Hz, 2H,  $m\text{-H}_{\text{Ar-bdp}}$ ), 7.06 (d,  $J = 8.0$  Hz, 2H,  $o\text{-H}_{\text{Ar-bdp-blue}}$ ), 6.89 (br. s, 2H,  $\gamma\text{-H bdp-blue}$ ), 6.45 (s, 1H,  $\text{NC}(\text{OR})\text{CHN}$ ), 6.17 (bs, 2H,  $\beta\text{-H bdp-blue}$ ), 4.02 (t,  $J = 6.3$  Hz, 2H, alkyl chain  $\text{-CH}_2\text{O-}$ ), 3.86 (t,  $J = 7.0$  Hz, 2H, alkyl chain  $\text{-CH}_2\text{-Ar bdp-blue}$ ), 3.46 – 3.28 (m, 6H, DBU), 3.03 (t,  $J = 6.9$  Hz, 2H, alkyl chain  $\text{-CH}_2\text{-NH-bdp-blue}$ ), 2.91 (m, 4H, DBU + alkyl chain  $\text{CH}_2$  bdp-green), 2.75 – 2.56 (m, 4H,  $\text{CH } i\text{Pr}$ ), 2.48 (s, 6H,  $\text{CH}_3$  bdp-blue), 2.45 (s, 6H,  $\text{CH}_3$  bdp-green), 2.43 – 2.37 (m, 4H,  $\text{CH}_2\text{CH}_3$  bdp-green), 2.25 (s, 6H,  $\text{CH}_3$  bdp-green), 2.12 – 1.89 (m, 2H, alkyl chain  $\text{CH}_2$ ), 1.81 – 1.45 (m, 12H, DBU + alkyl chain), 1.41 – 1.31 (m, 12H,  $\text{CH}_3$   $i\text{Pr}$ ), 1.26 (d,  $J = 6.7$  Hz, 6H,  $\text{CH}_3$   $i\text{Pr}$ ), 1.21 (d,  $J = 6.8$  Hz, 6H,  $\text{CH}_3$   $i\text{Pr}$ ), 1.05 (t,  $J = 7.5$  Hz, 6H,  $\text{CH}_2\text{CH}_3$  bdp-green).

$^{13}\text{C}$  NMR (126 MHz,  $\text{CD}_2\text{Cl}_2$ )  $\delta$  / ppm = 185.1 ( $\text{C}_{\text{NHC}}$ ), 166.2, 152.1, 148.7, 148.5, 146.4, 146.0, 145.9, 145.7, 144.3, 135.8, 135.0, 134.2, 132.8, 132.4, 130.7, 130.6, 130.5, 130.4, 130.4, 128.3, 125.4, 124.2, 124.2, 124.1, 124.0, 99.6, 72.4, 48.7, 47.4, 43.9, 41.1, 37.9, 34.5, 32.0, 31.9, 31.3, 29.6, 29.6, 29.4, 29.1, 29.0, 28.7, 28.2, 26.6, 26.3, 24.6, 24.4, 24.1, 24.0, 23.88, 23.84, 23.77, 23.37, 23.29, 22.7.

$^{19}\text{F}$  NMR (471 MHz,  $\text{CD}_2\text{Cl}_2$ )  $\delta$  / ppm = -145.40 (q,  $J(^{11}\text{B}\text{-}^{19}\text{F}) = 33$  Hz) (green Bodipy), -147.51 (q,  $J(^{11}\text{B}\text{-}^{19}\text{F}) = 28$  Hz) (blue Bodipy).

HRMS (ESI positive):  $m/z$  calcd. for  $\text{C}_{70}\text{H}_{87}\text{AuB}_2\text{F}_4\text{N}_7\text{O}$ : 1336.67545  $[\text{M}+\text{H}]^+$ ; found 1336.67735.

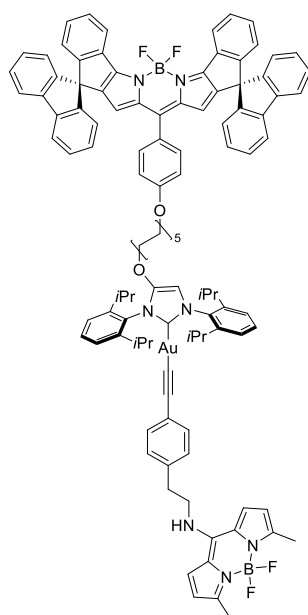

**Synthesis of 24-dbu.** A vial was charged with [AuCl(NHC\_red)] (6.1 mg, 0.004 mmol, 1.0 eq) and **21** (1.5 mg, 0.004 mmol, 1.0 eq) and dissolved in a minimum amount of CH<sub>2</sub>Cl<sub>2</sub> ~200  $\mu$ L. To the reaction mixture, DBU (6.0  $\mu$ L, 0.02 mmol, 10 eq) was added and the solution was stirred at rt for 48 h. The reaction mixture was diluted with CH<sub>2</sub>Cl<sub>2</sub> (50 mL), and washed two times with brine (50 mL) and two times with water (50 mL). The organic layer was dried over MgSO<sub>4</sub>, filtered and the volatiles evaporated on the rotavap under reduced pressure. The remaining **24-dbu** as a red solid was used in further experiments without additional purification (8.0 mg, 99%).

<sup>1</sup>H NMR (500 MHz, CD<sub>2</sub>Cl<sub>2</sub>)  $\delta$  8.44 (d,  $J$  = 7.6 Hz, 2H), 7.83 (d,  $J$  = 7.6 Hz, 4H), 7.57 – 7.50 (m, 4H), 7.40 – 7.32 (m, 10H), 7.27 – 7.22 (m, 4H), 7.17 (t,  $J$  = 7.5 Hz, 4H), 7.07 (d,  $J$  = 7.5 Hz, 2H), 6.94 (d,  $J$  = 7.6 Hz, 4H), 6.75 (d,  $J$  = 7.7 Hz, 2H), 6.63 (d,  $J$  = 7.7 Hz, 2H), 6.42 (s, 1H), 6.27 (s, 2H), 6.23 – 6.13 (m, 3H), 3.97 (t,  $J$  = 6.2 Hz, 2H), 3.91 – 3.80 (m, 4H), 3.46 – 3.32 (m, 6H, DBU) 3.02 (t,  $J$  = 6.7 Hz, 2H), 2.72 – 2.55 (m, 4H), 2.48 (s, 6H), 2.31 – 2.29 (m, 2H, DBU) 1.89 – 1.61 (m, 12H, DBU + alkyl chain), 1.38 – 1.19 (m, 40H, CH<sub>3</sub> *i*Pr + alkyl chain).

<sup>19</sup>F NMR (471 MHz, CD<sub>2</sub>Cl<sub>2</sub>)  $\delta$  -146.44 (q,  $J(^{11}\text{B}-^{19}\text{F})$  = 31 Hz), -147.52 (q,  $J(^{11}\text{B}-^{19}\text{F})$  = 31 Hz) (blue Bodipy).

HRMS (ESI positive):  $m/z$  calcd. for C<sub>111</sub>H<sub>104</sub>AuB<sub>2</sub>F<sub>4</sub>N<sub>7</sub>O<sub>2</sub>: 1862.8112 [M+H]<sup>+</sup>; found 1862.8116.

### 3. UV/Vis and Fluorescence Data

#### 3.1 Evaluation of red-green FRET

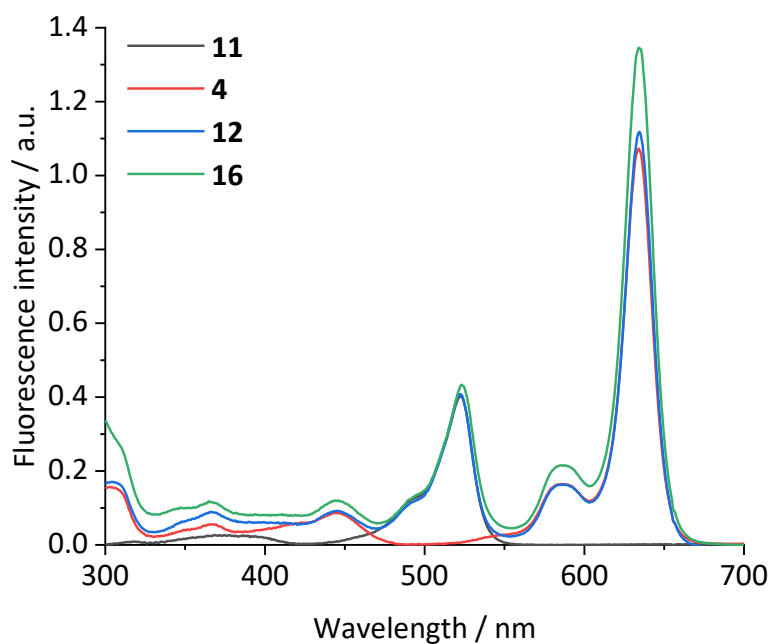

**Figure S 1** Individual absorbance spectra of Bodipys **11** and **4**, Bodipy dyad **12**, and Widenhoefer complex **16** in  $\text{CH}_2\text{Cl}_2$  ( $5.0 \mu\text{M}$ ).

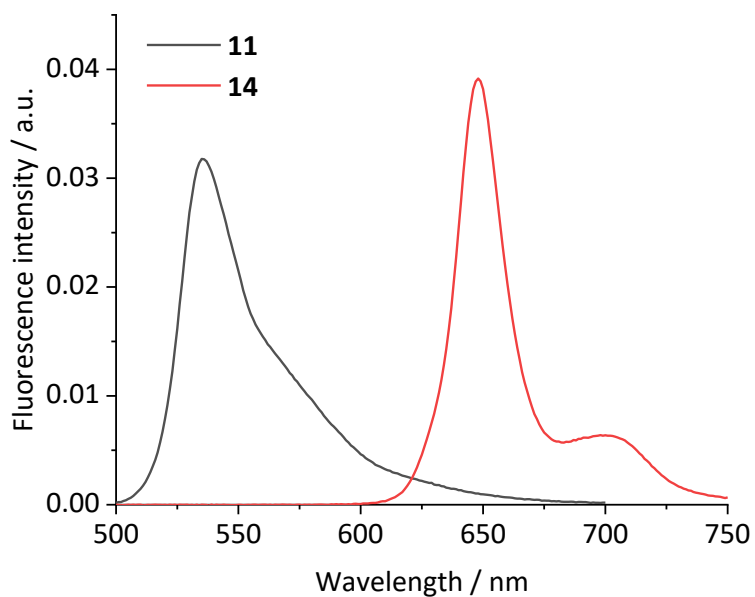

**Figure S 2** Emission spectra of compounds **11** ( $\lambda_{\text{ex}} = 500 \text{ nm}$ ) and **14** ( $\lambda_{\text{ex}} = 620 \text{ nm}$ ) in  $\text{CH}_2\text{Cl}_2$  ( $5.0 \mu\text{M}$ ).



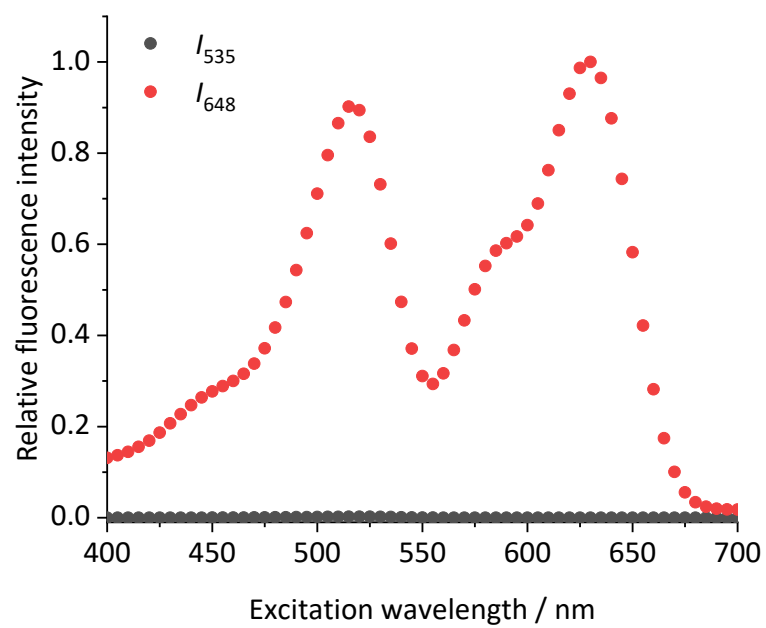

**Figure S 3** Excitation spectrum of Bodipy dyad **12** in  $\text{CH}_2\text{Cl}_2$  ( $5.0 \mu\text{M}$ ).

(a)

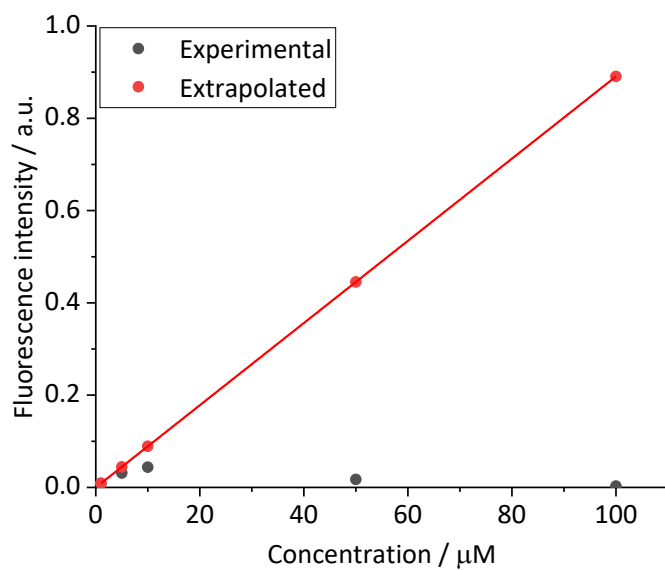

(b)

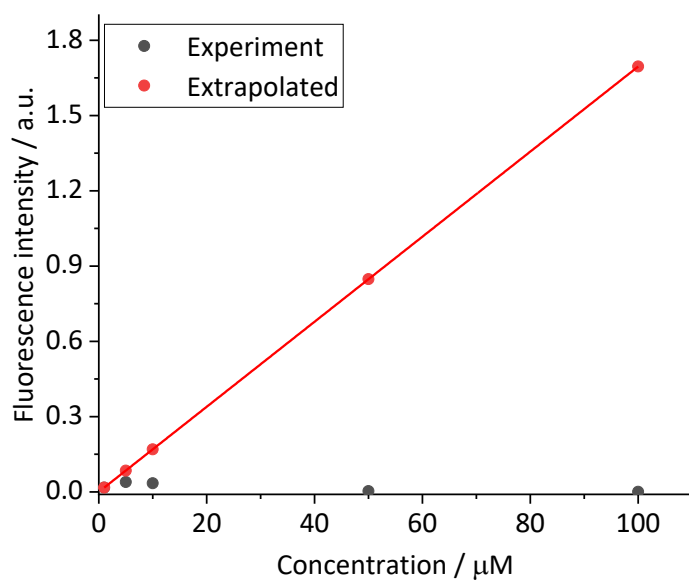

**Figure S 4** Concentration dependence of emission intensity for (a) **11** ( $\lambda_{\text{ex}} = 500$  nm,  $\lambda_{\text{em,max}} = 535$  nm) and (b) Bodipy **4** ( $\lambda_{\text{ex}} = 620$  nm,  $\lambda_{\text{em,max}} = 648$  nm) in  $\text{CH}_2\text{Cl}_2$  ( $5.0 \mu\text{M}$ ). Red circles represent extrapolated emission intensities at the respective concentrations.

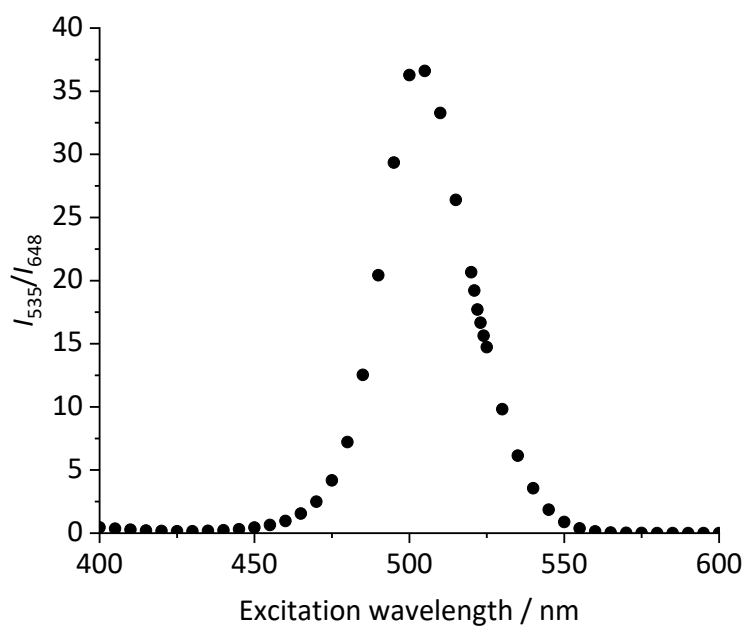

**Figure S 5** Plot of excitation wavelength vs. ratio of emission intensities of individual compound **11** ( $\lambda_{em,max} = 535$  nm) and **4** ( $\lambda_{em,max} = 648$  nm) in  $\text{CH}_2\text{Cl}_2$  ( $5.0 \mu\text{M}$ ). The maximum  $I_{535}/I_{648}$  value is 36.6 at 505 nm.

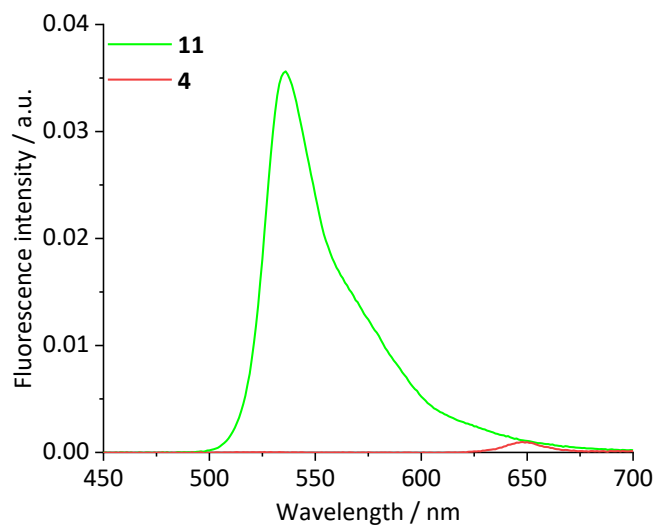

**Figure S 6** Emission spectrum of individual compounds **11** and **4** in  $\text{CH}_2\text{Cl}_2$  solution ( $5.0 \mu\text{M}$ ) photo-excited at 505 nm showed the maximum  $I_{535}/I_{648}$  value.

**Procedure of FRET experiments.** To a quartz cuvette containing a solution of gold acetylde complex **13** (5.0  $\mu\text{M}$ ) or gold thiolate **15** (5.0  $\mu\text{M}$ ) in  $\text{CH}_2\text{Cl}_2$ , a stock solution of gold-NTf<sub>2</sub> complex **14** (1.0 eq.) (stored at -20  $^\circ\text{C}$  until use), was added dropwise in one portion. The emission intensities at 535 and 648 nm were monitored every interval 5 seconds over the measurement time.

(a)

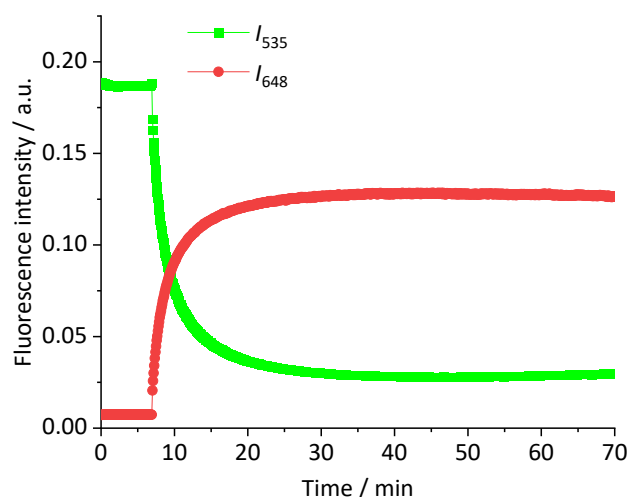

(b)

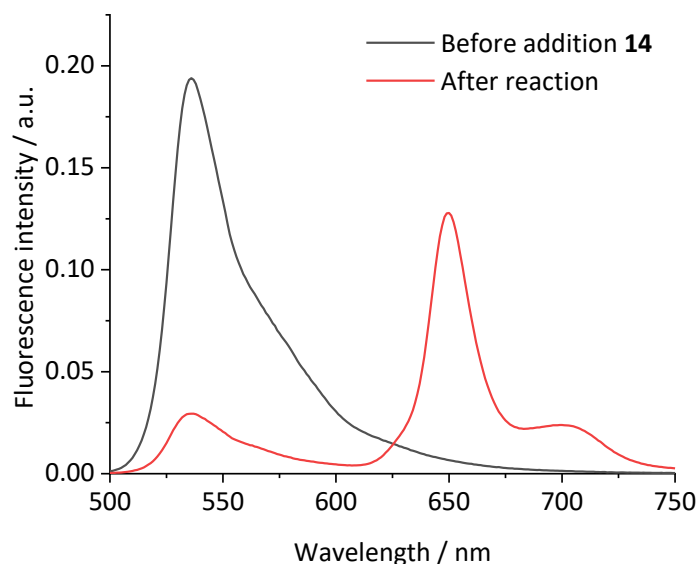

**Figure S 7** (a) Time profile of emission intensities at 535 and 648 nm for a mixture of gold acetylde complex **13** (5.0  $\mu\text{M}$ ) and gold-NTf<sub>2</sub> complex **14** (5.0  $\mu\text{M}$ ) in  $\text{CH}_2\text{Cl}_2$  ( $\lambda_{\text{ex}} = 505 \text{ nm}$ ). (b) Emission spectrum of **13** (5.0  $\mu\text{M}$ ) in  $\text{CH}_2\text{Cl}_2$  before and after addition of **14** (5.0  $\mu\text{M}$ ) in (a).

(a)

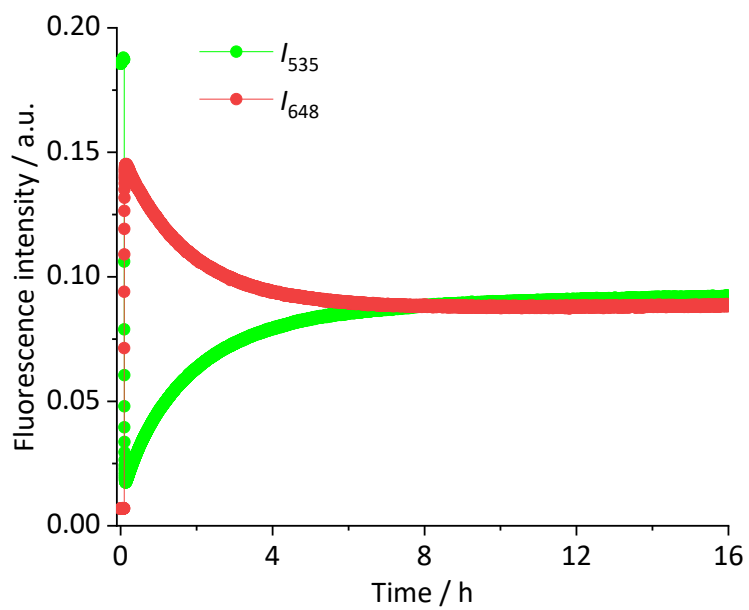

(b)

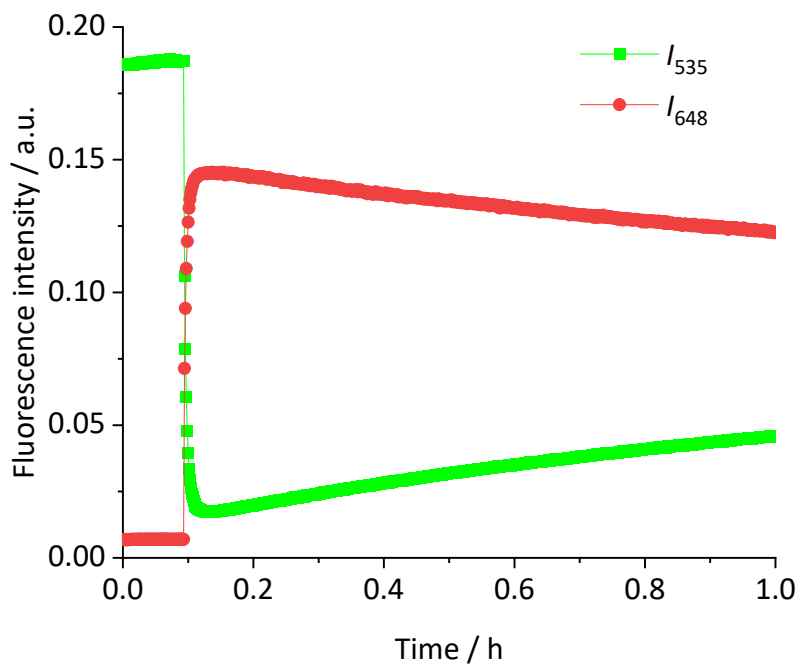

(c)

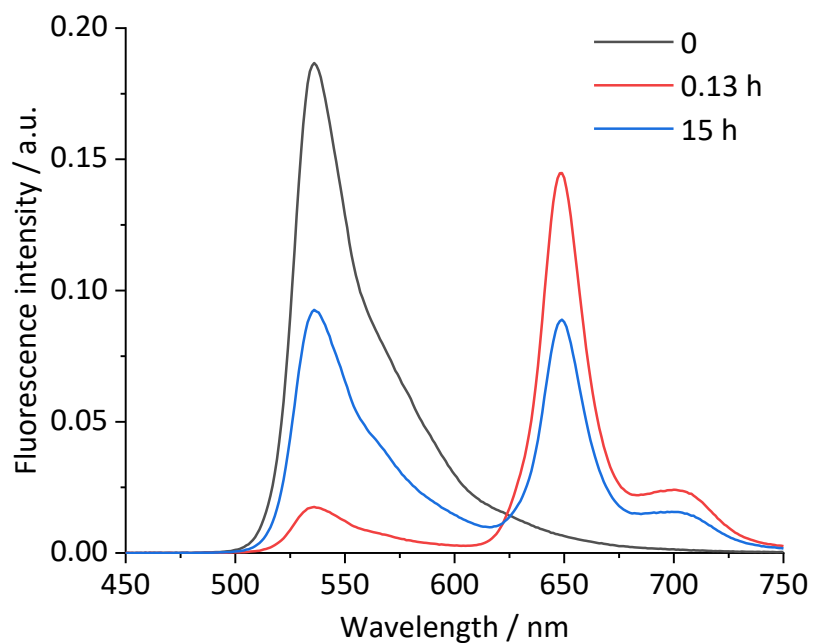

**Figure S 8 (a)** Time profile of emission intensities at 535 and 648 nm for a mixture of gold thiolate complex **17** (5.0  $\mu\text{M}$ ) and gold-NTf<sub>2</sub> complex **14** (5.0  $\mu\text{M}$ ) in CH<sub>2</sub>Cl<sub>2</sub> ( $\lambda_{\text{ex}}$  = 505 nm). (b) displayed range from 0 to 1 h of (a). (c) Emission spectrum of **17** (5.0  $\mu\text{M}$ ) in CH<sub>2</sub>Cl<sub>2</sub> before (0 h) and after addition of **14** (5.0  $\mu\text{M}$ ) in (a).

### 3.2 Monitoring ion pairing using red-green FRET

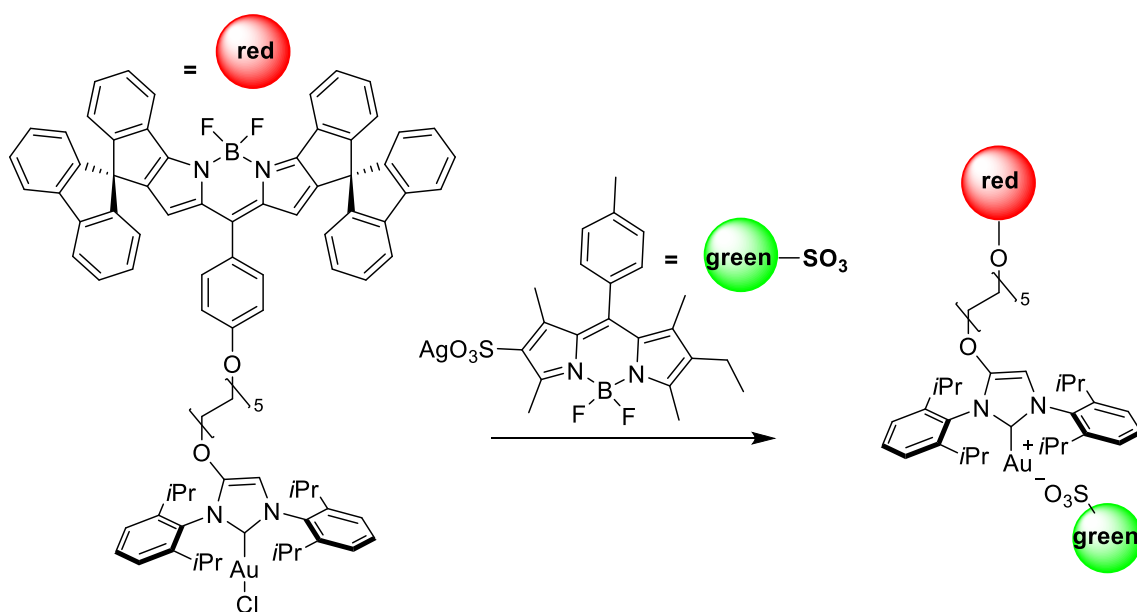

**FRET experiments.** All experiments were carried out in quartz cuvettes with path lengths of 10.0 mm. A cuvette was charged with the respective Bodipy ion-paired dyad **18** (2.0 mL, 1.00  $\mu\text{M}$ ) in toluene or 1,2-dichloroethane solution. Next, the measurement was started and the fluorescence intensity at the designated wavelength was observed (530 nm for the green emission and 648 nm for the red emission). After approximately 1 min (when the intensity of fluorescence signal remains constant), portions of freshly distilled DMAc or phenylacetylene in toluene solution (0.18M) were added to the cuvette (typical range 5  $\mu\text{L}$  - 100  $\mu\text{L}$ ). After each aliquot, the fluorescence intensity at the specific wavelength was monitored. The next aliquot was added when the fluorescence level was found to remain constant after 30 s. The titration was terminated when addition of a new aliquot did not lead to further change in the fluorescence signal. The fluorescence data were finally corrected for dilution of the sample. In order to obtain the respective fluorescence intensity for the fully separated ion pair an (8M) solution of  $\text{NBu}_4\text{Br}$  in 1,2-dichloroethane was added (10  $\mu\text{L}$ , 0.08 mmol).

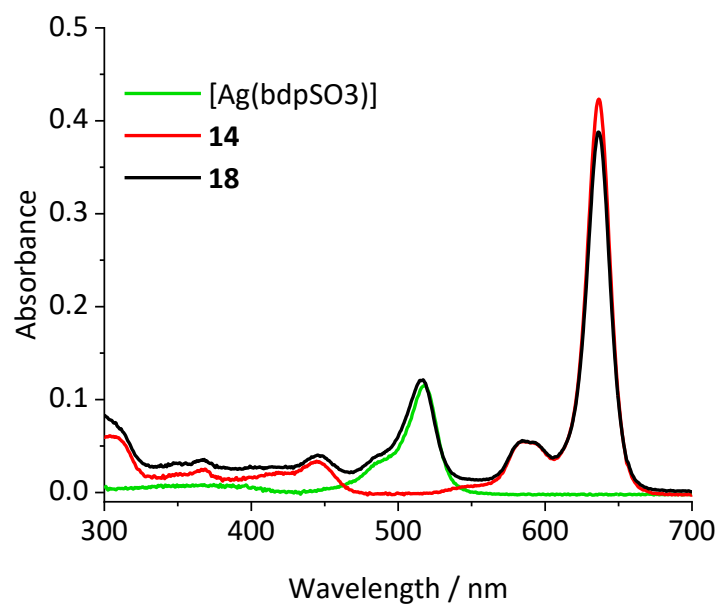

**Figure S 9** Absorbance spectra of [Ag(bdpSO<sub>3</sub>)] (green), (red) 14 and 18 (black) in toluene solution (2.0 μM).

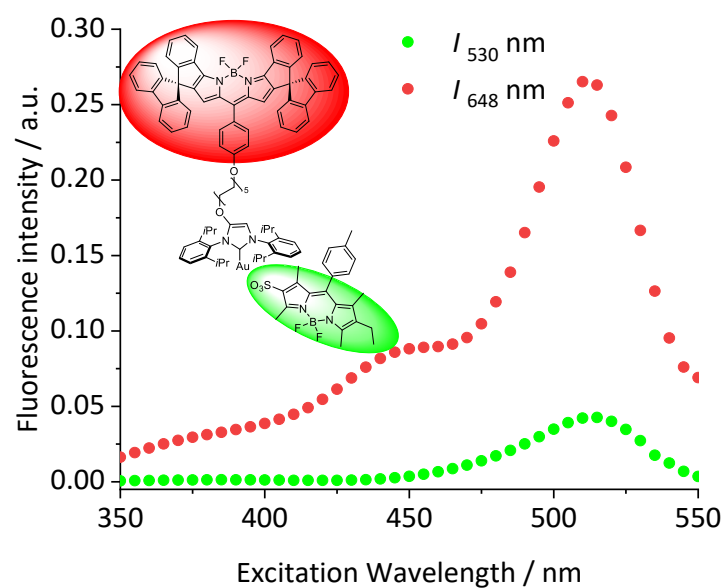

**Figure S 10** Plot of excitation wavelength vs. observed fluorescence intensity for the corresponding [Ag(bdpSO<sub>3</sub>)] ( $I_{em,max} = 530$  nm) and for the red Bodipy ( $I_{em,max} = 648$  nm) in 18 (close pair) in toluene solution (2.0 μM).



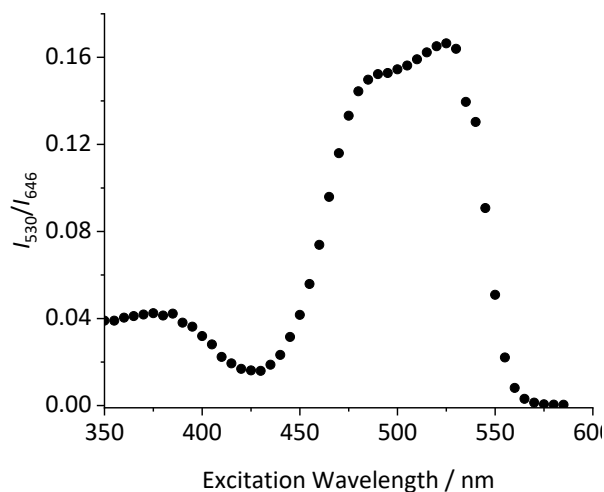

**Figure S 11** Plot of excitation wavelength vs. ratio of emission intensities of green Bodipy ( $I_{em,max} = 530$  nm) and red Bodipy ( $I_{em,max} = 648$  nm) components in **18** (close pair) in toluene solution ( $2.0 \mu\text{M}$ ).

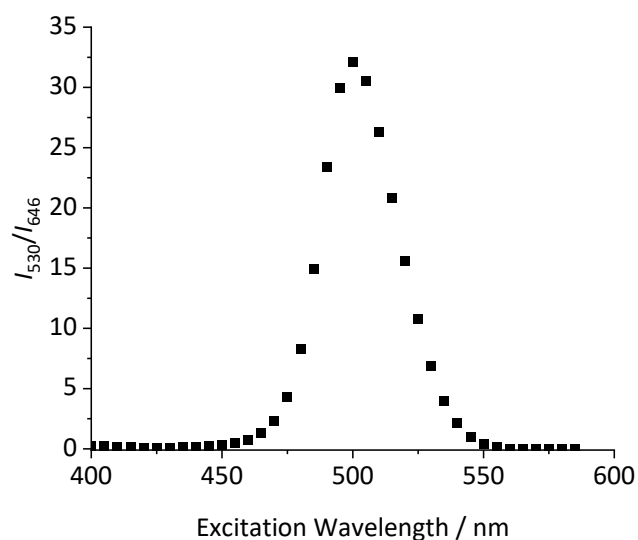

**Figure S 12** Plot of excitation wavelength vs. ratio of individual fluorophore emission intensities of  $[\text{Ag}(\text{bdpSO}_3)]$  (at  $I_{em,max} = 530$  nm) and **14** (at  $I_{em,max} = 648$  nm) in toluene solution ( $2.0 \mu\text{M}$ ).

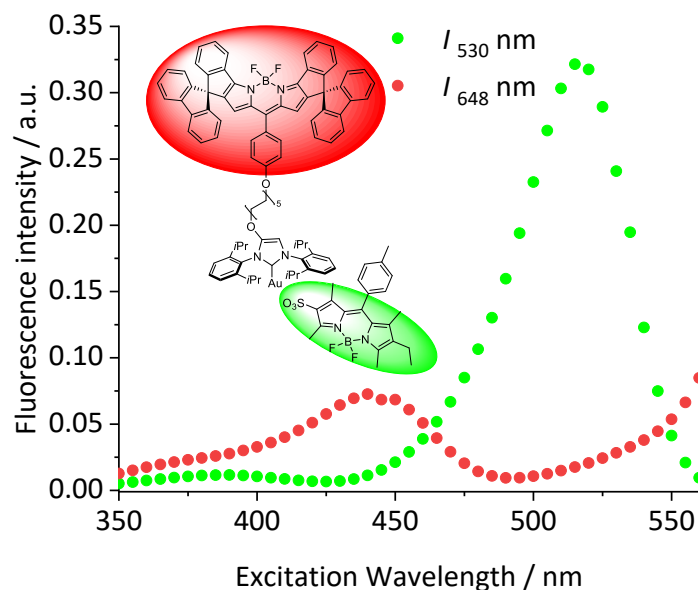

**Figure S 13** Plot of excitation wavelength vs. observed fluorescence intensity for the corresponding green Bodipy (at  $I_{em,max} = 530$  nm) and for the red Bodipy (at  $I_{em,max} = 648$  nm) components in **18** (not close pair) in toluene solution (2.0  $\mu$ M) after addition of NBu<sub>4</sub>Br solution in 1,2-dichloroethane (8M, 10  $\mu$ L, 8.00 mmol).

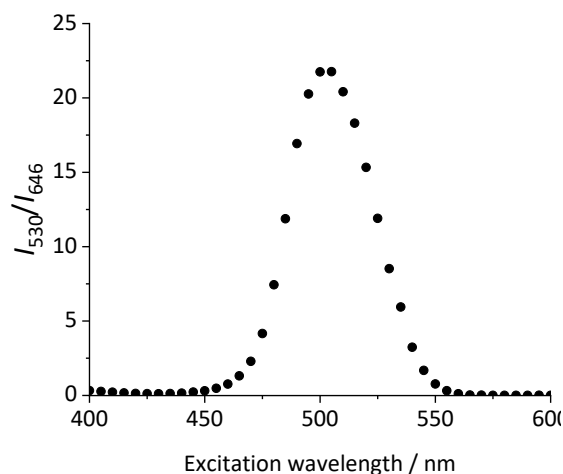

**Figure S 14** Plot of excitation wavelength vs. ratio of emission intensities for the corresponding green Bodipy (at  $I_{em,max} = 530$  nm) and for the red Bodipy (at  $I_{em,max} = 648$  nm) components in the separated cation and anion in dyad **18** in toluene solution (2.0  $\mu$ M) after addition (8M) solution of NBu<sub>4</sub>Br in 1,2-dichloroethane (10  $\mu$ L, 8.00 mmol).

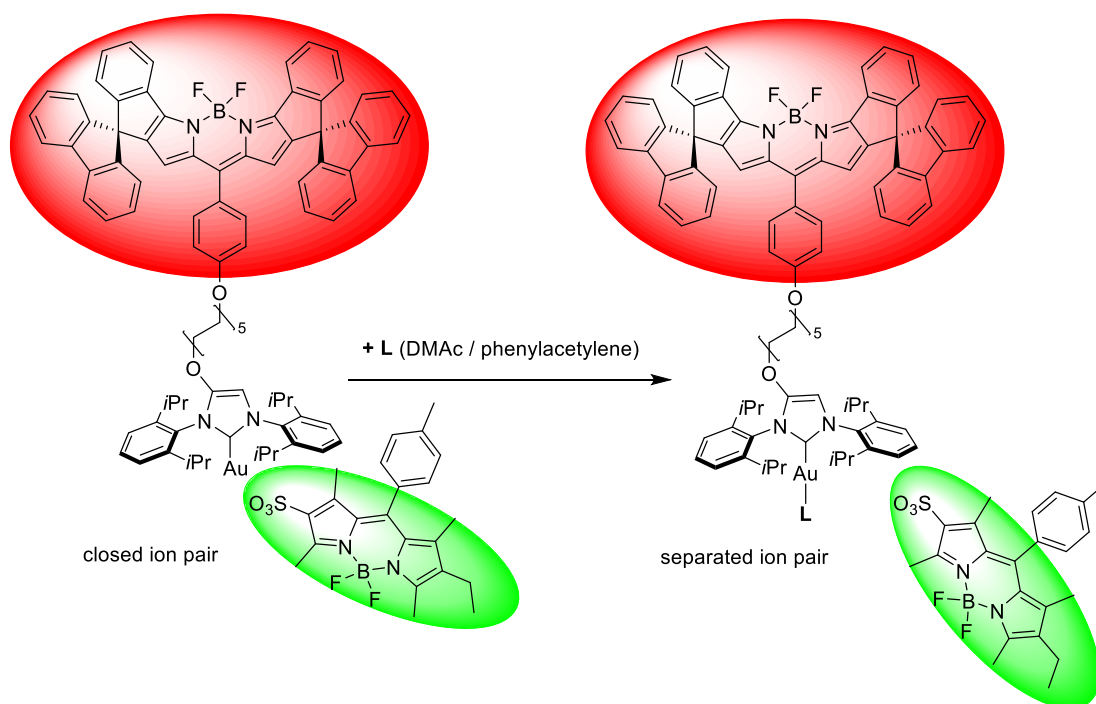

**Scheme S 2** General reaction scheme for the FRET ion pair titration experiment.

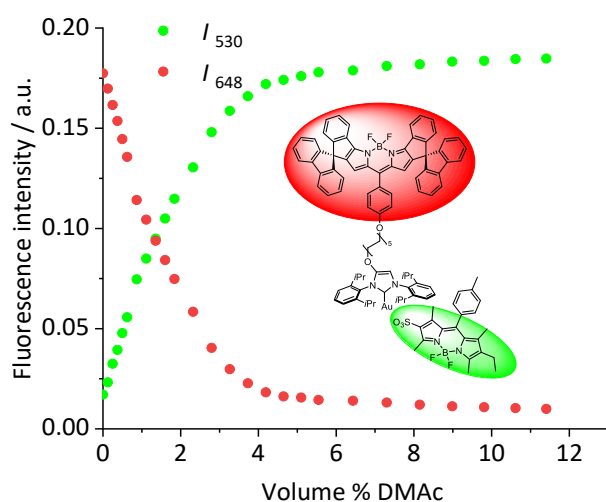

**Figure S 15** Plot of added volume of DMAc vs. change of fluorescence intensity ( $\lambda_{exc} = 500$  nm) for the corresponding green Bodipy (at  $I_{em,max} = 530$  nm) and for the red Bodipy (at  $I_{em,max} = 648$  nm) components in **18** in toluene solution ( $1.0 \mu\text{M}$ ) after addition of DMAc. Simultaneous drop of the FRET fluorescence intensity signal at 648 nm and corresponding gain of intensity at 530 indicates a separation of **18** complex and separation of the FRET pair after the addition of the specific amount of DMAc.

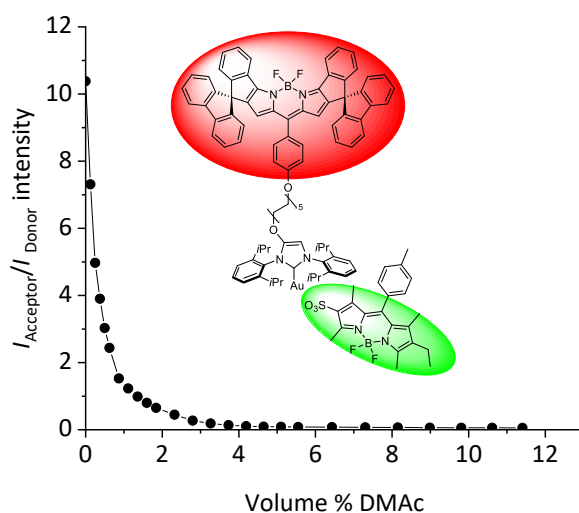

**Figure S 16** Plot of changes of the relative fluorescence intensity ( $\lambda_{\text{exc}} = 500 \text{ nm}$ ) of acceptor red Bodipy (at  $I_{\text{em,max}} = 648 \text{ nm}$ ) to donor green Bodipy (at  $I_{\text{em,max}} = 530 \text{ nm}$ ) components in **18** in toluene solution ( $1.0 \mu\text{M}$ ) vs. volume of added dimethylacetamide.

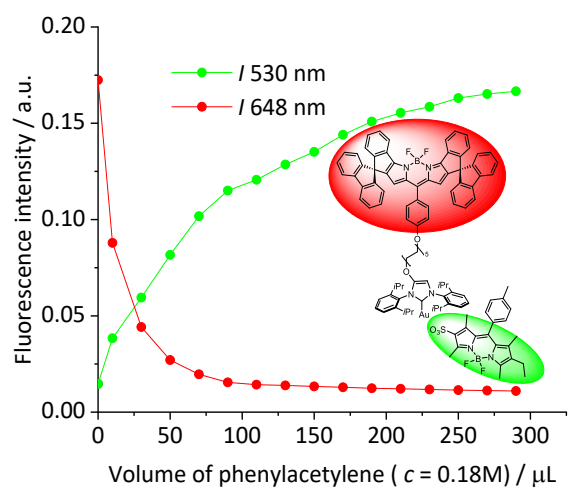

**Figure S 17** Plot of added volume of phenylacetylene solution ( $\mu\text{L}$ ) in toluene ( $c = 0.18 \text{ M}$ ,  $10 \mu\text{L} = 900 \text{ eq}$ ) vs. change of fluorescence intensity ( $\lambda_{\text{exc}} = 500 \text{ nm}$ ) for the corresponding green Bodipy (at  $I_{\text{em,max}} = 530 \text{ nm}$ ) and for the red Bodipy (at  $I_{\text{em,max}} = 648 \text{ nm}$ ) components in the **18** in toluene solution ( $1.0 \mu\text{M}$ ).

### 3.3 Evaluation of the blue-green-red triad

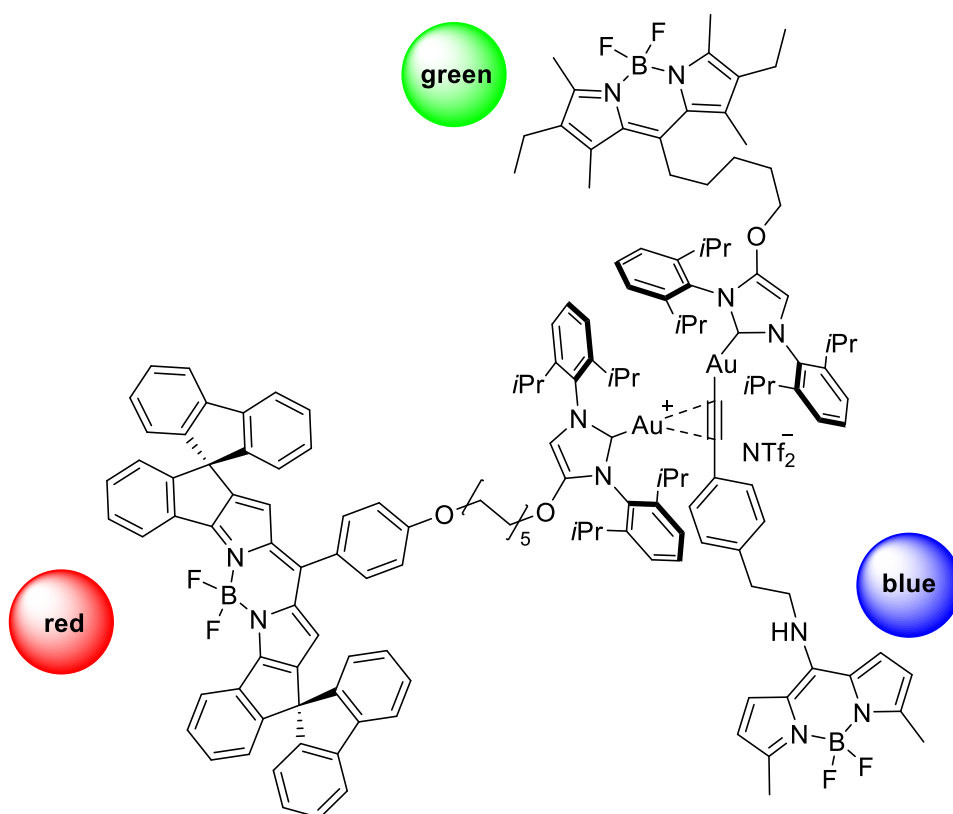

**FRET experiments.** A quartz cuvette was filled with blue-green dyad **22-dbu** in 2 mL of 1,2-dichloroethane solution (5.0  $\mu\text{M}$ ). Next, the measurement was started and the fluorescence intensity at the emission maximum of the corresponding fluorophore was observed at the designated wavelength (at 535 nm for the green emission and at 652 nm for the red emission). After approximately 1 min (once the fluorescence signal intensity remained constant), a solution of **14** (5  $\mu\text{M}$ , 1.0 eq) in 1,2-dichloroethane was added. The time of addition is indicated with arrows. After approx. 1-2 min more of the **14** complex solution (5  $\mu\text{M}$ , 1.0 eq) in 1,2-dichloroethane was added and a formation of the Widenhoefer dimer was observed.

The reported fluorescence are peak intensities. For selected examples, it was shown that changes in peak intensities are the same as changes in integrated intensities. This is possible since the Bodipy units are remote tags, which are not influenced to a significant extent by the nature of the organometallic complex.

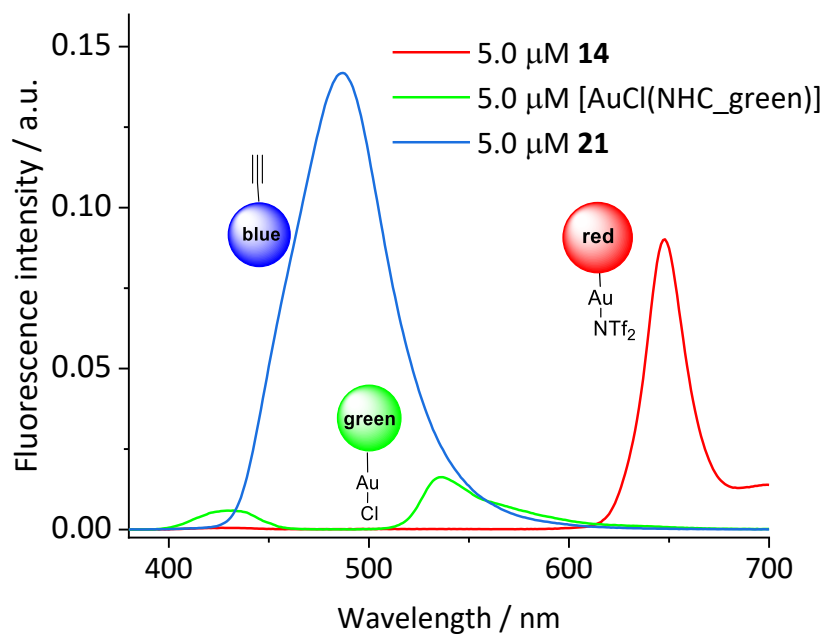

**Figure S 18** Emission spectra of **21**, [AuCl(NHC\_green)] and **14** (at  $\lambda_{\text{ex}} = 423$  nm) in 1,2-DCE (5.0  $\mu\text{M}$ ).

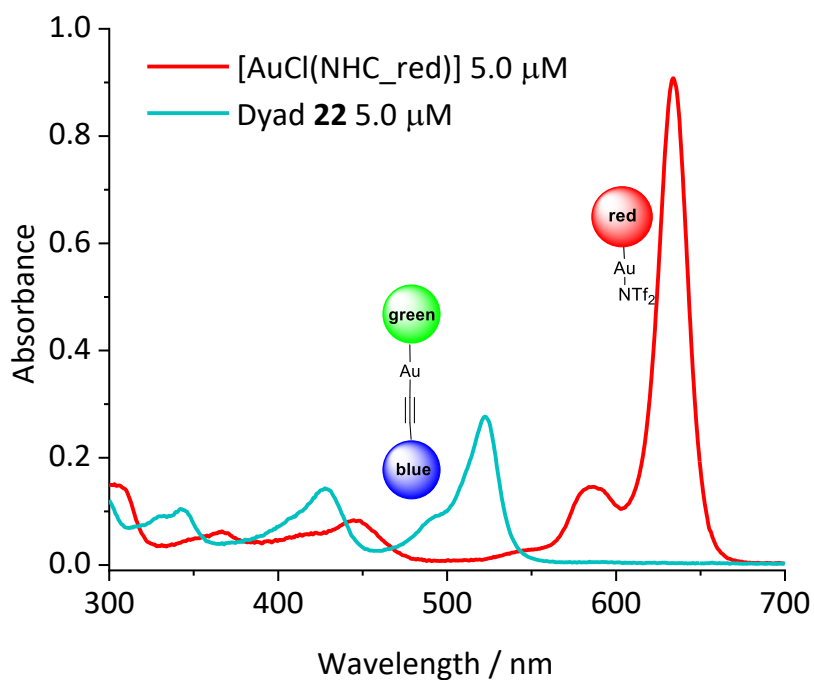

**Figure S 19** Absorbance spectra of blue-green dyad **22** (cyan) and **14** in 1,2-DCE (5.0  $\mu\text{M}$ ).

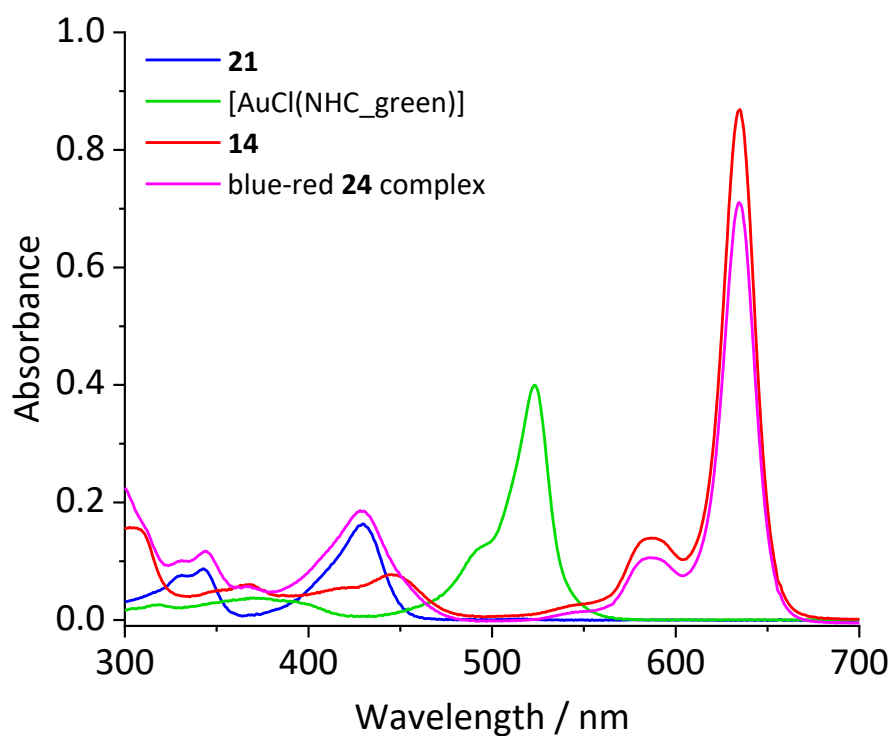

**Figure S 20** Absorbance spectra of blue-red **24** (pink), **14**, **21** and [AuCl(NHC\_green)] in 1,2-DCE (5.0 μM).

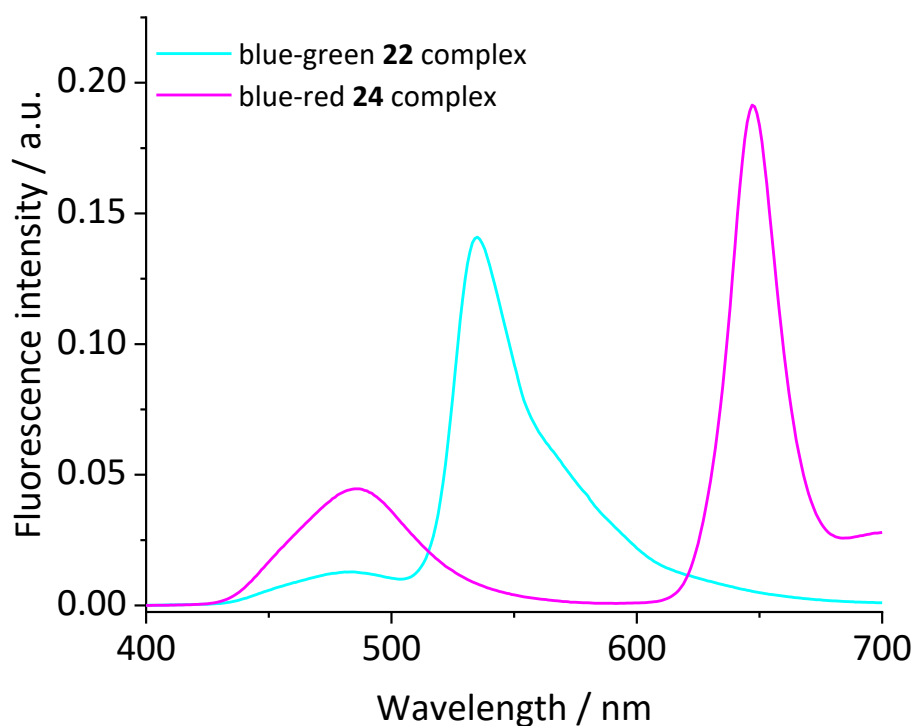

**Figure S 21** Plot of emission spectra of blue-red **24** complex (pink) and blue-green **22** (cyan) (at  $\lambda_{ex} = 423$  nm) in 1,2-DCE (5.0 μM).

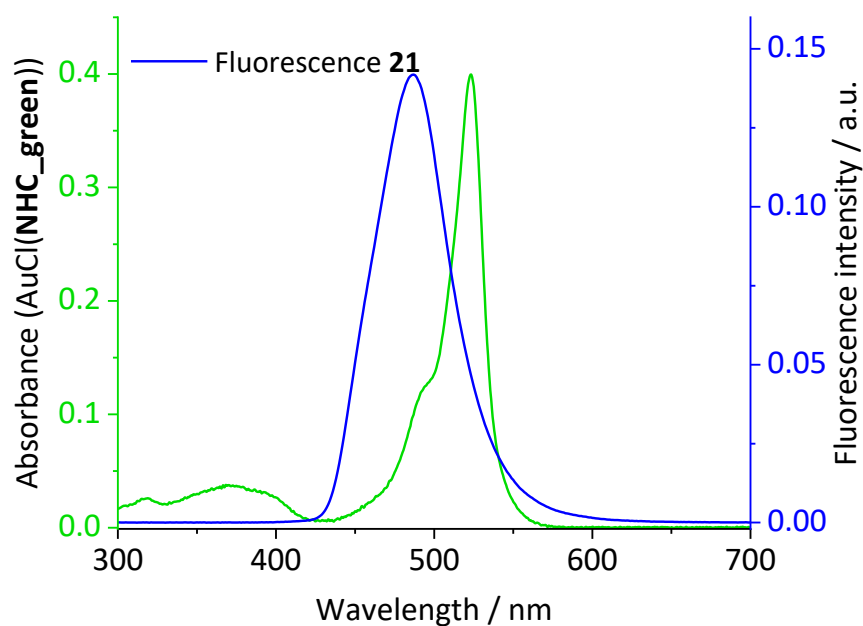

**Figure S 22** Plot of emission spectra (at  $\lambda_{\text{ex}} = 423$  nm) of **21** (blue) and absorbance spectra of [AuCl(NHC<sub>green</sub>)] (green) in 1,2-DCE (5.0 μM).

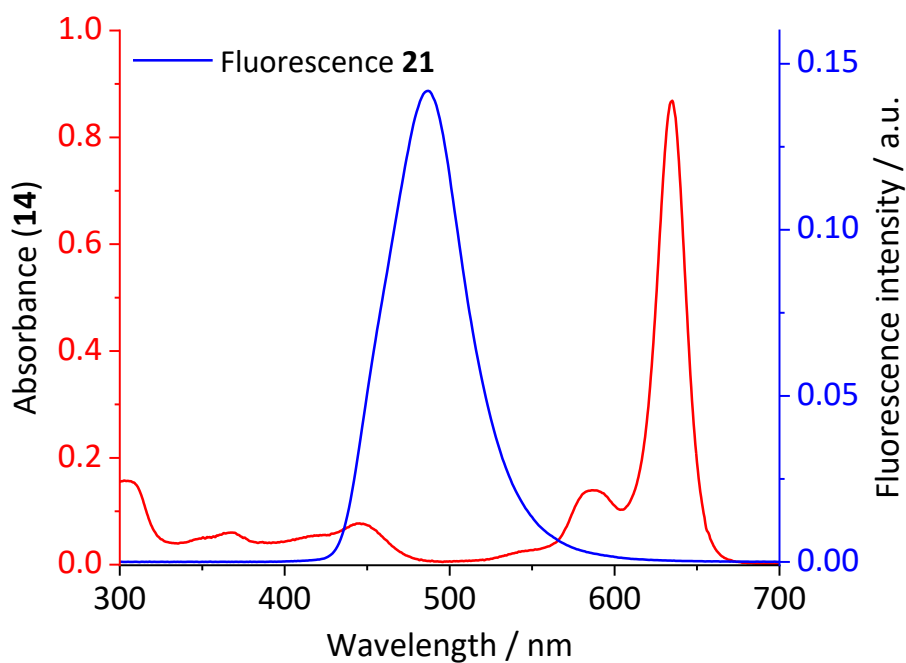

**Figure S 23** Plot of emission spectra (at  $\lambda_{\text{ex}} = 423$  nm) of **21** (blue) and absorbance spectra of **14** (red) in 1,2-DCE (5.0 μM).



**Triad or Dyad-Dyad.** Convincing evidence for the chemical formation of the triad was presented. However, the absorption and emission spectra of the red and the blue Bodipy show some overlap and based on this, excitation energy can also be transferred from the blue Bodipy directly to the red Bodipy. If this were the predominant energy transfer mechanism, the triad would be better described as a dyad-dyad from a photophysical point of view. However, the overlap of the emission spectrum of the blue Bodipy with the absorption spectrum of the green Bodipy is much larger than the overlap with the absorption spectrum of the red Bodipy (Figs. S22, 23). Based on this it is likely, that the majority of the excitation energy is channeled along the blue-green-red triad. A simple experiment provides additional information. Blue phenyl acetylene **21** and [AuCl(NHC\_red)] were reacted in the presence of dbu (analogous to the synthesis of **22**) to provide **24**·dbu (scheme 8) and the fluorescence monitored. The red fluorescence observed directly after mixing represents the cross-talk intensity, any additional red fluorescence observed during the slow formation of the dyad corresponds to the formation of the blue-red dyad and blue-red FRET, as does any decrease in the blue fluorescence. The formation of the dyad leads to an approx. 30% increase in the red emission, but the blue emission is at ca. 50% of the initial value. Based on this it is concluded, that the direct blue-red FRET is the minor pathway and the blue-green-red system reported is best described as a triad.

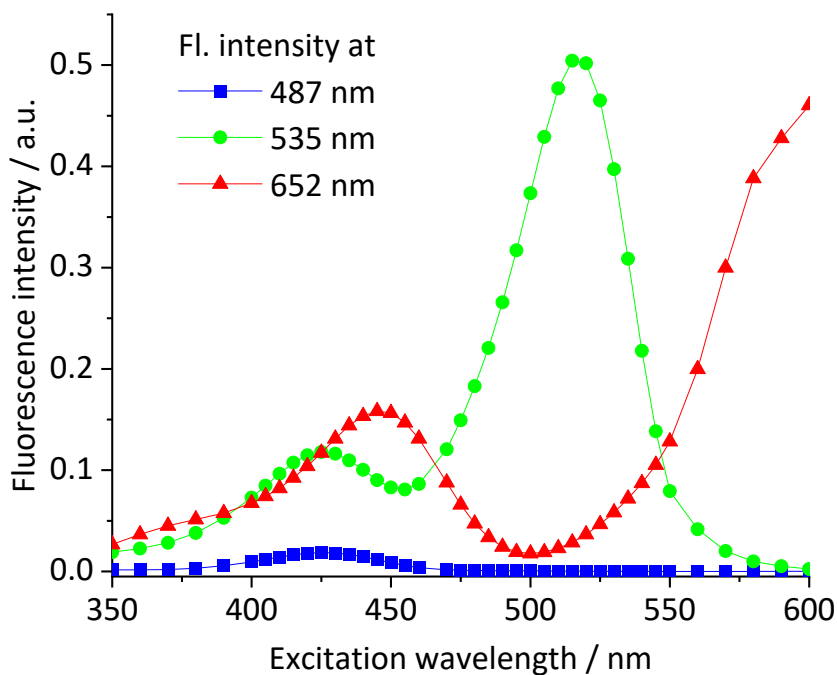

**Figure S 24** Plot of excitation wavelength vs. observed fluorescence intensities for the corresponding blue-green dyad **22** system for the blue Bodipy component (at  $\lambda_{em,max} = 487$  nm) and for the green Bodipy component (at  $\lambda_{em,max} = 535$  nm) and for **14** (at  $\lambda_{em,max} = 652$  nm) in 1,2-DCE solution ( $5.0 \mu\text{M}$ ).

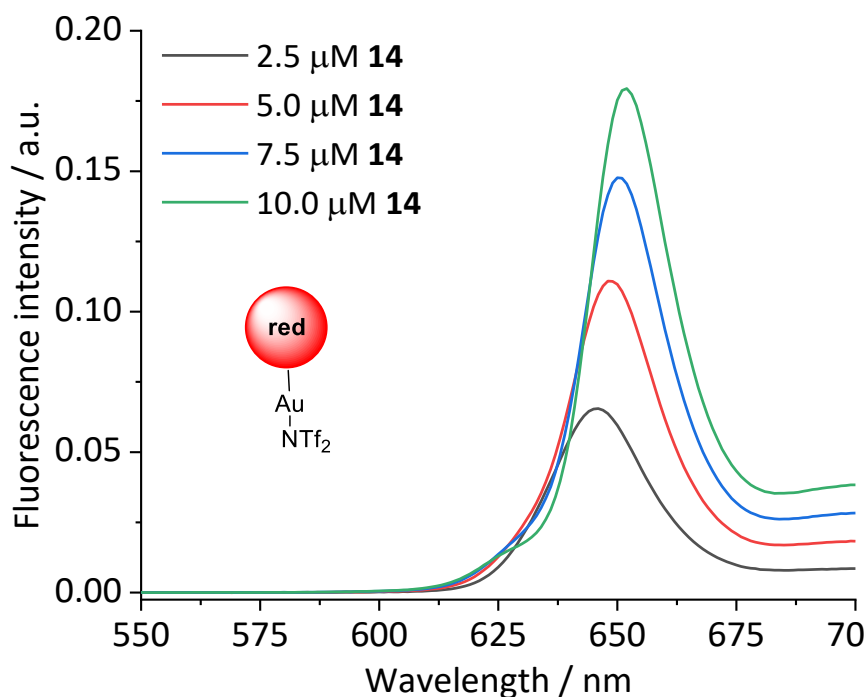

**Figure S 25** Plot of emission spectra of **14** complex in 1,2-DCE solution ( $\lambda_{ex} = 423$  nm) at different concentrations ( $2.5 - 10.0 \mu\text{M}$ ).

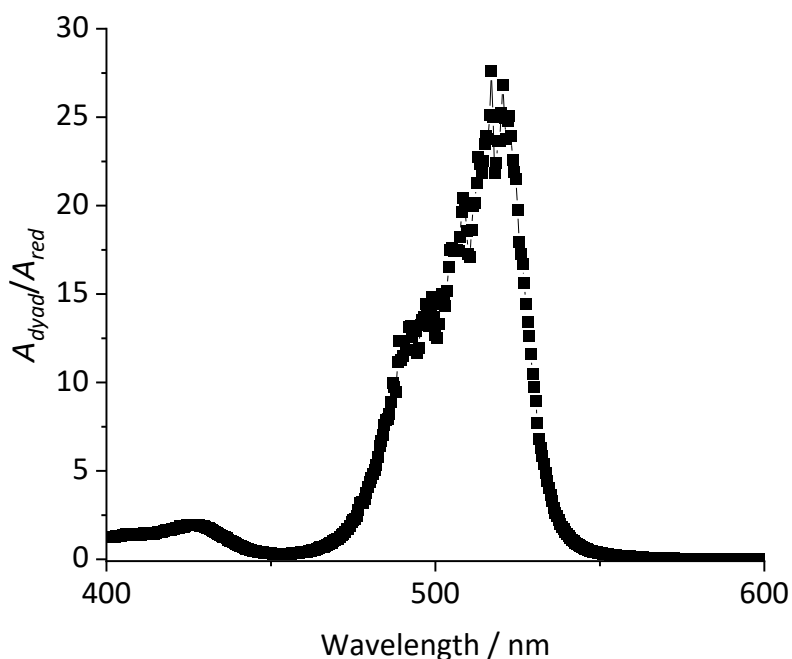

**Figure S 26** Plot of absorbance ratio of blue-green dyad **22** system to individual **14** complex ( $\lambda_{ex,max} = 636$  nm) in 1,2-DCE solution ( $5.0 \mu\text{M}$ ).

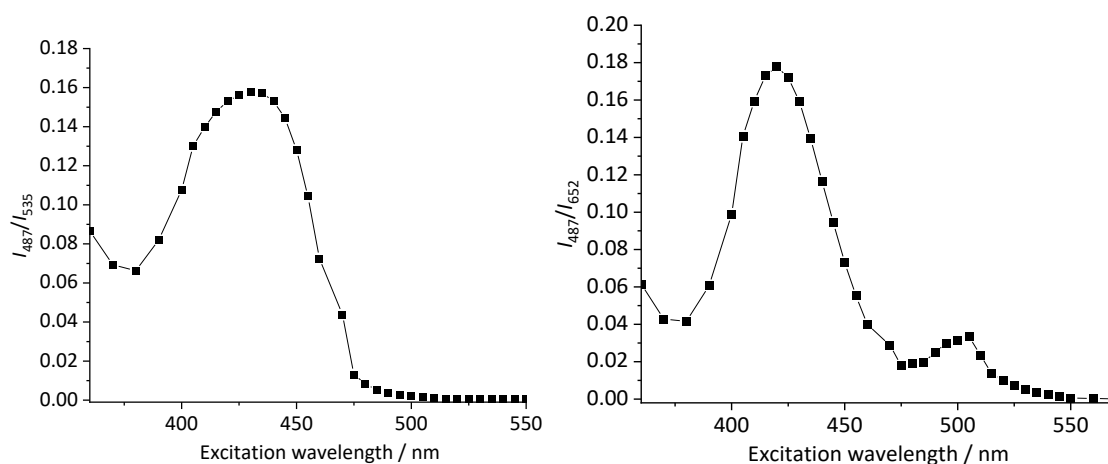

**Figure S 27** Left: Plot of excitation wavelength vs. ratio of emission intensities of **blue** Bodipy component (at  $I_{em,max} = 487$  nm) relatively to **green** Bodipy component (at  $I_{em,max} = 535$  nm) within the blue-green dyad **22** system in 1,2-DCE solution ( $5.0 \mu\text{M}$ ). Right: Plot of excitation wavelength vs. ratio of emission intensities of **blue** Bodipy component (at  $I_{em,max} = 487$  nm) within the blue-green dyad **22** system relatively to the individual **14** complex (at  $I_{em,max} = 652$  nm) in 1,2-DCE solution ( $5.0 \mu\text{M}$ ).

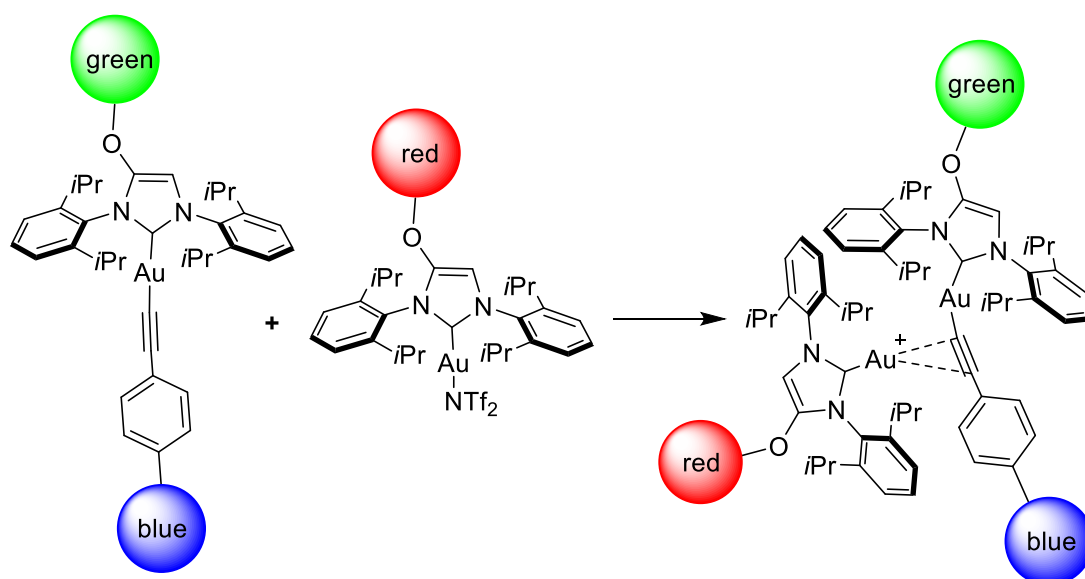

**Scheme S 3** Reaction of the formation of the blue-green-red triad FRET system **23** via gold acetylide system **22**.

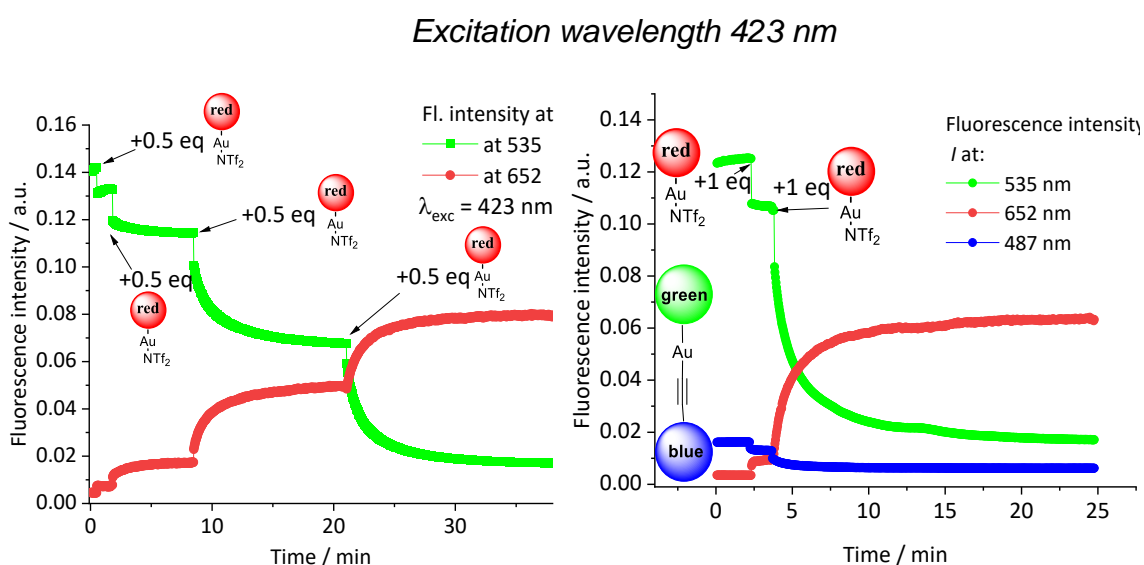

**Figure S 28** Plot of the time-dependent fluorescence intensities (subtracted values of red cross-talk intensity) for the green Bodipy (at  $\lambda_{em,max} = 535$  nm) and (at  $\lambda_{em,max} = 652$  nm) for the red Bodipy components at  $\lambda_{exc} = 423$  nm within the formed blue-green-red triad **23** after additions of **14** complex ( $n$  eq). Initial concentration of complexes in 1,2-DCE solution ( $5.0 \mu\text{M}$ ).

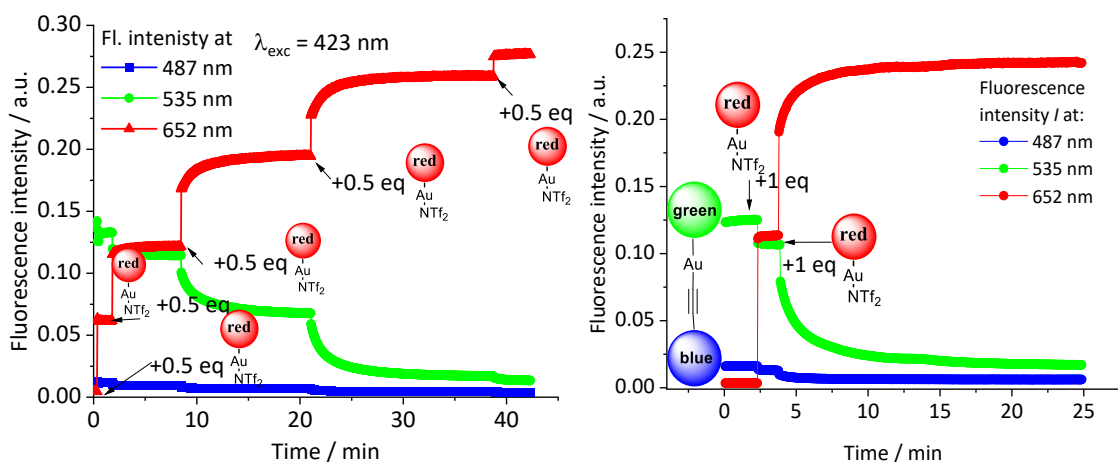

**Figure S 29** Plot of the time-dependent fluorescence intensities for the blue Bodipy (at  $\lambda_{em,max} = 487$  nm), for the green Bodipy (at  $\lambda_{em,max} = 535$  nm) and for the red Bodipy (at  $\lambda_{em,max} = 652$  nm) components at  $\lambda_{exc} = 423$  nm within the formed blue-green-red triad **23** after additions of **14** complex (n eq). Initial concentration of complexes in 1,2-DCE ( $5.0 \mu M$ ).

*Excitation wavelength 500 nm*

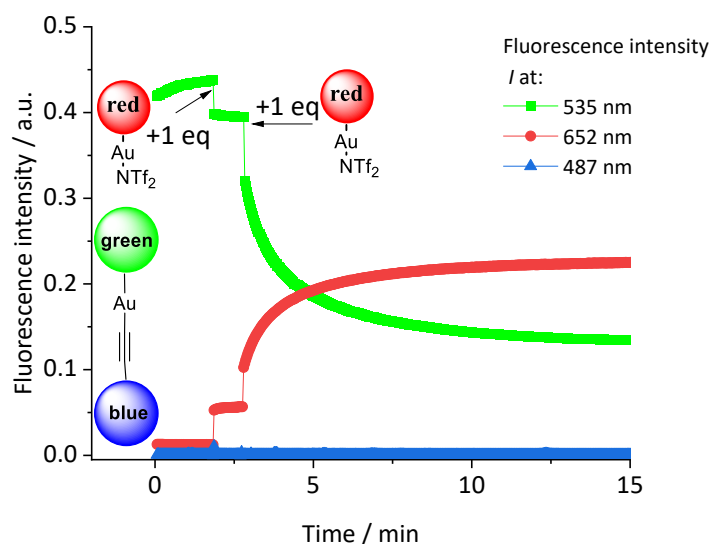

**Figure S 30** Plot of the time-dependent fluorescence intensities for the green Bodipy (at  $\lambda_{em,max} = 535$  nm) and for the green Bodipy (at  $\lambda_{em,max} = 652$  nm) components at  $\lambda_{exc} = 500$  nm within the blue-green-red triad **23** after additions of **14** complex (1.0 eq). Initial concentration of complexes in 1,2-DCE ( $5.0 \mu M$ ).

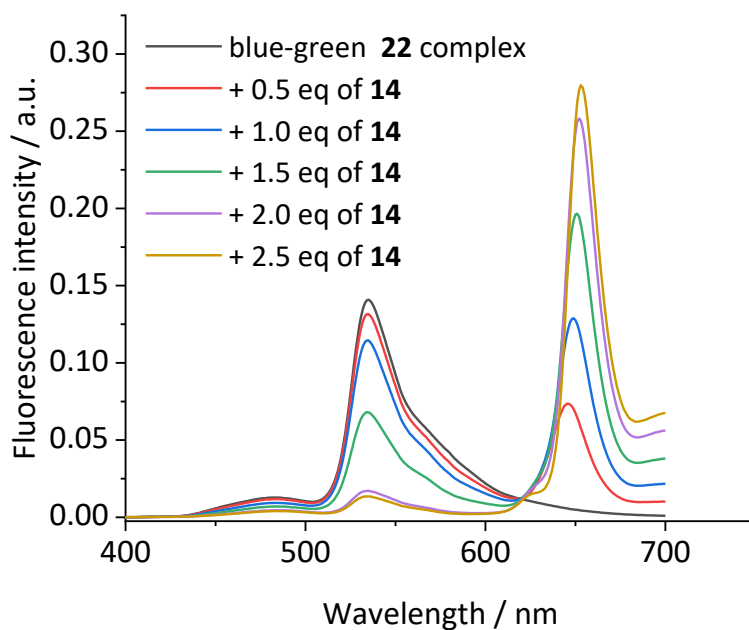

**Figure S 31** Emission spectra ( $\lambda_{\text{ex}} = 423 \text{ nm}$ ) of triad system **23** in  $5.0 \mu\text{M}$  1,2-DCE solution before (black = blue-green dyad **22**) and after addition of **14** solution (2.5 - 12.5  $\mu\text{M}$  / 0.5 – 2.5 eq) in 1,2-DCE.

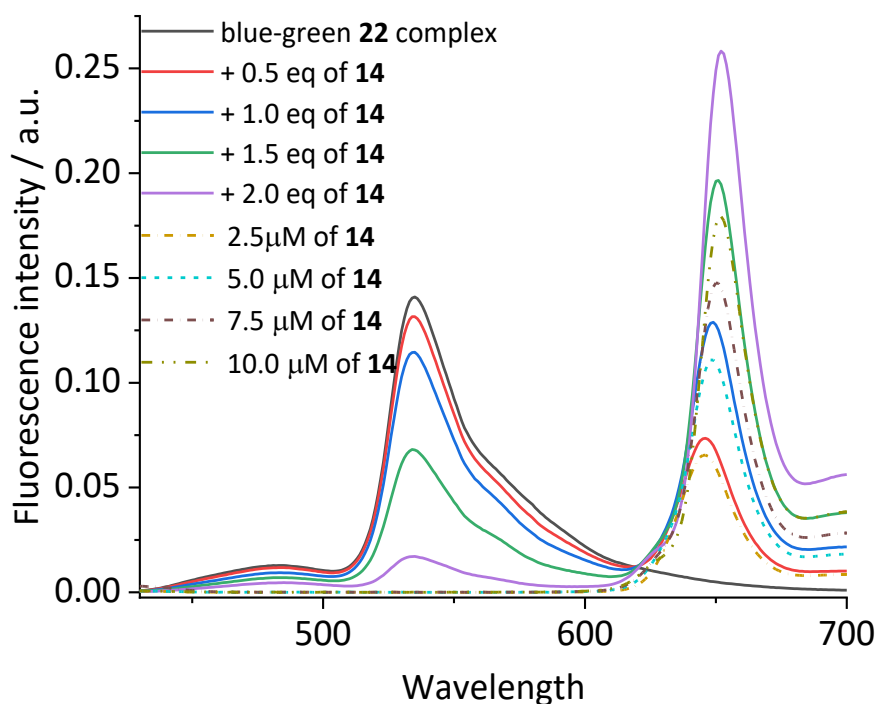

**Figure S 32** Emission spectra ( $\lambda_{\text{ex}} = 423 \text{ nm}$ ) of dyad system **22** (solid line) in  $5.0 \mu\text{M}$  1,2-DCE solution before and after addition of (2.5 - 10  $\mu\text{M}$  / 0.5 – 2.0 eq) **14** solution in 1,2-DCE. Emission spectra of individual **14** in different concentrations (2.5 - 10.0  $\mu\text{M}$ ) (dashed line) in 1,2-DCE solution.

### 3.4 Fluorescence and absorbance spectra for synthesized complexes

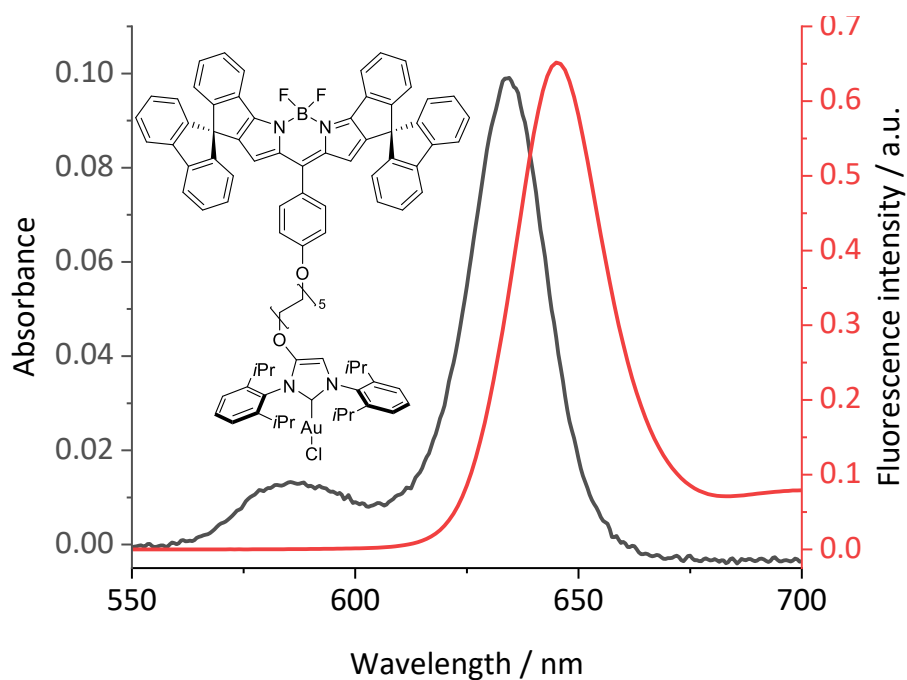

**Figure S 33** Absorbance (black) and emission (red,  $\lambda_{\text{exc}} = 636 \text{ nm}$ ) spectra of [AuCl(NHC\_red)] complex in 1,2-dichloroethane solution.

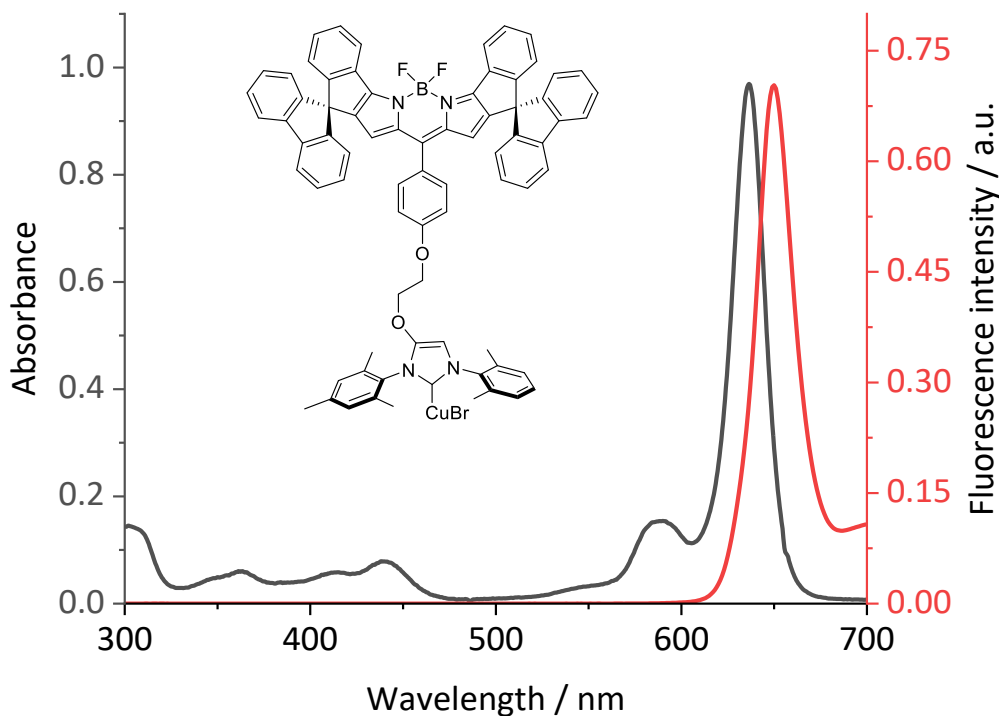

**Figure S 34** Absorbance (black) and emission (red,  $\lambda_{\text{exc}} = 636 \text{ nm}$ ) spectra of [CuBr(8)] complex in 1,2-dichloroethane solution (5.0  $\mu\text{M}$ ).

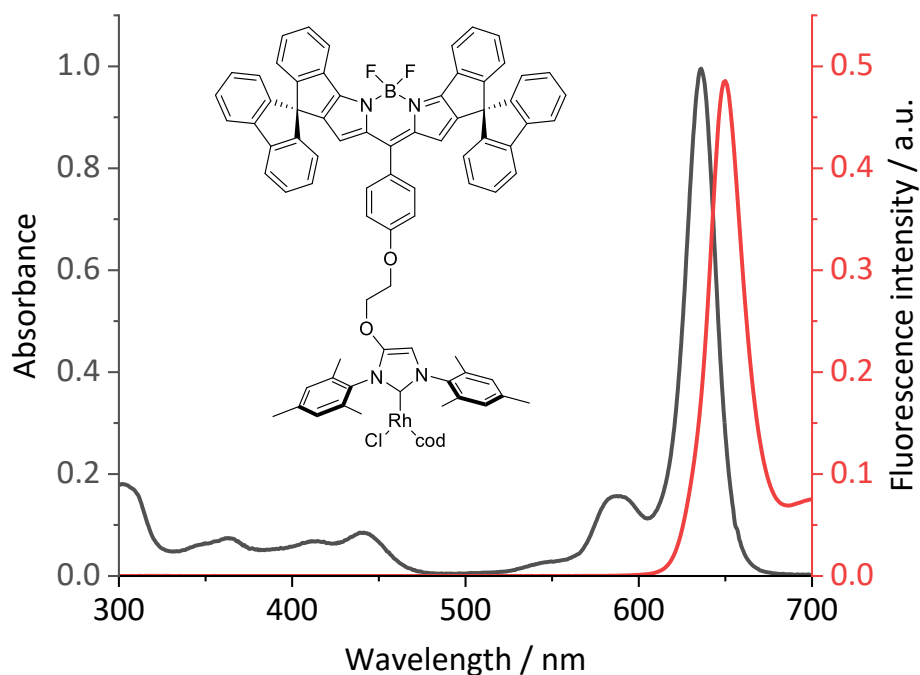

**Figure S 35** Absorbance (black) and emission (red,  $\lambda_{\text{exc}} = 636 \text{ nm}$ ) spectra of [RhCl(cod)(8)] complex in 1,2-dichloroethane solution (5.0 μM).

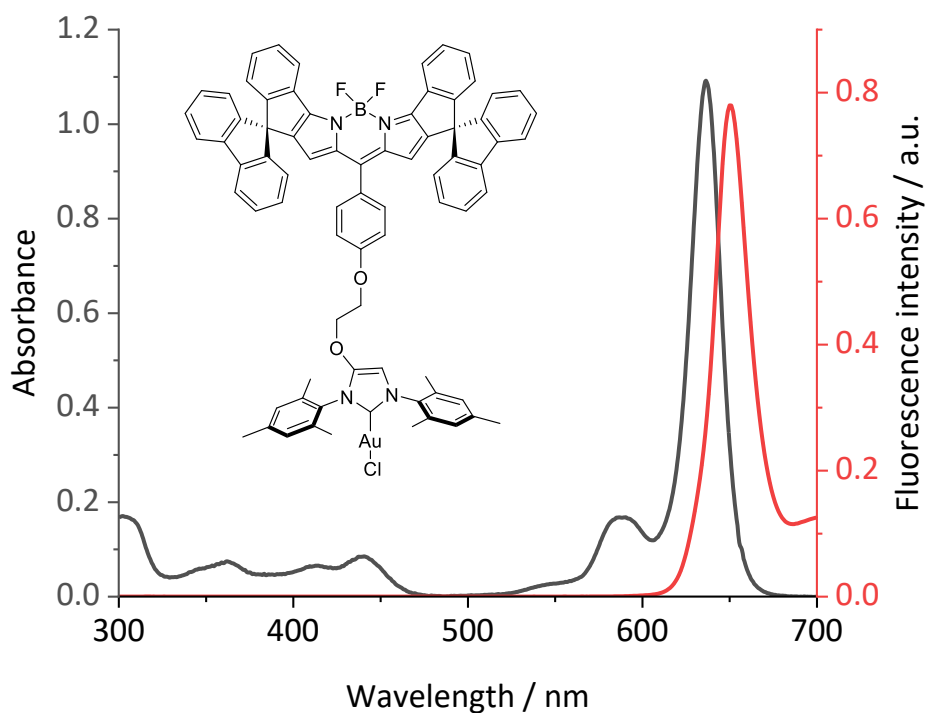

**Figure S 36** Absorbance (black) and emission (red,  $\lambda_{\text{exc}} = 636 \text{ nm}$ ) spectra of [AuCl(8)] complex in 1,2-dichloroethane solution (5.0 μM).



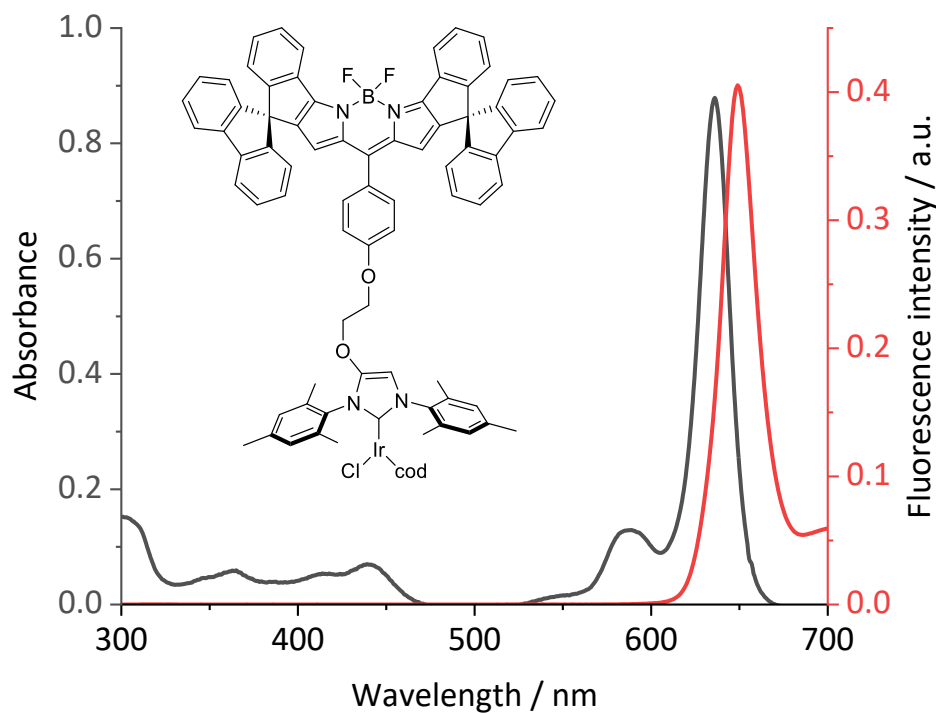

**Figure S 37** Absorbance (black) and emission (red,  $\lambda_{\text{exc}} = 636 \text{ nm}$ ) spectra of  $[\text{IrCl}(\text{cod})(\mathbf{8})]$  complex in 1,2-dichloroethane solution ( $5.0 \mu\text{M}$ ).

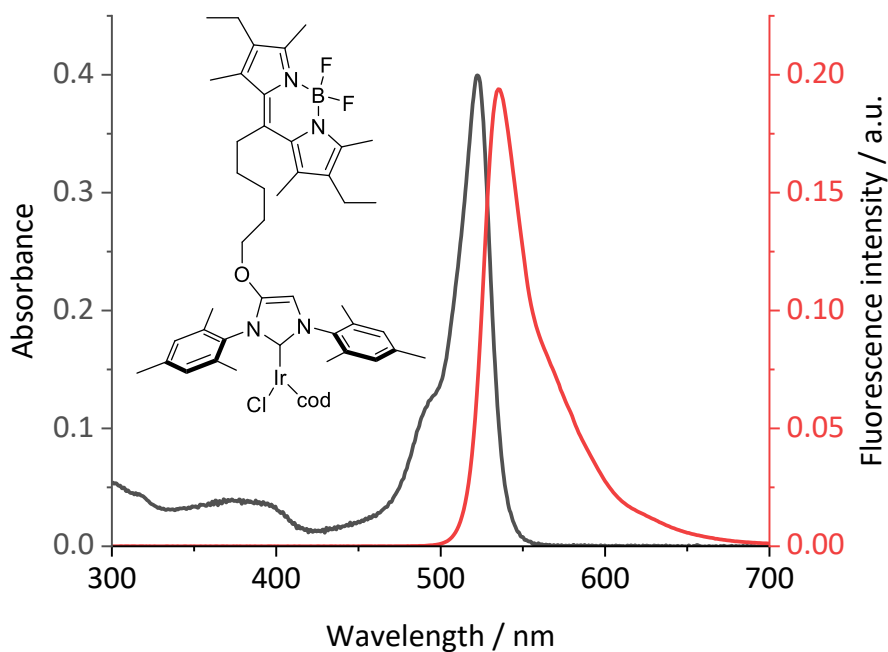

**Figure S 38** Absorbance (black) and emission (red,  $\lambda_{\text{exc}} = 523 \text{ nm}$ ) spectra of  $[\text{IrCl}(\text{cod})(\mathbf{9})]$  in 1,2-dichloroethane solution ( $5.0 \mu\text{M}$ ).

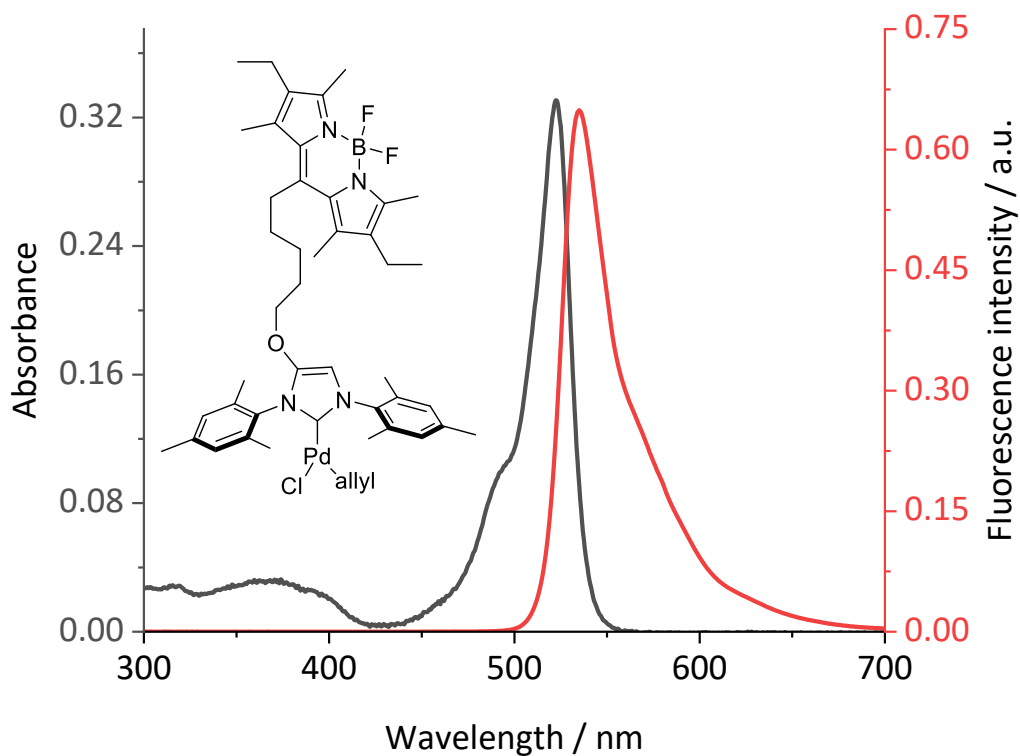

**Figure S 39** Absorbance (black) and emission (red,  $\lambda_{\text{exc}} = 523 \text{ nm}$ ) spectra of [Pd(allyl)Cl(9)] in 1,2-dichloroethane solution (5.0  $\mu\text{M}$ ).

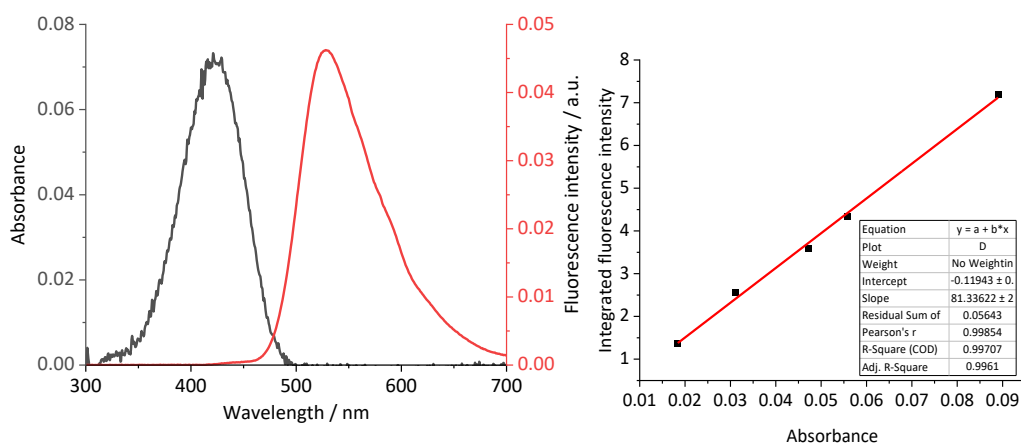

**Figure S 40** Left: absorbance (black) and emission (red,  $\lambda_{\text{exc}} = 444 \text{ nm}$ ) spectra of Coumarin 153 in ethanol solution. Right: integrated fluorescence intensity vs. absorbance plot for Coumarin 153.

### 3.5 Fluorescence quantum yield

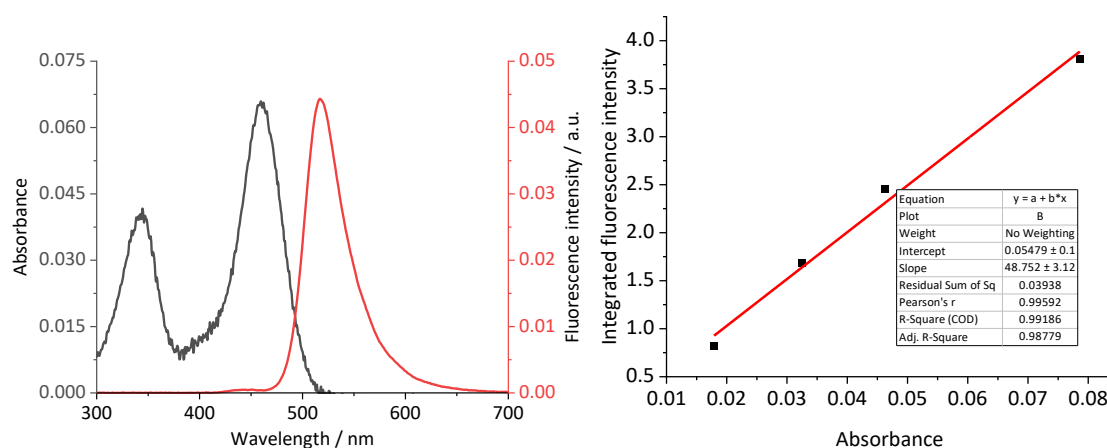

**Figure S 41** Left: absorbance (black) and emission (red,  $\lambda_{\text{exc}} = 444$  nm) spectra of **20** complex in 1,2-dichloroethane solution. Right: integrated fluorescence intensity vs. absorbance plot for **20** complex.

Quantum yield was determined according to the literature procedure (U. Resch-Genger, K. Rurack, *Pure Appl. Chem.*, **2013**, 85, 2005–2026) using Coumarin 153 (from Sigma-Aldrich, BioReagent, suitable for fluorescence) as the standard. Absorption and emission spectra were obtained over a range of concentrations (100 nM to 0.5  $\mu\text{M}$ , in 1,2-dichloroethane), where a linear correlation between concentration and absorption was observed. The absorbance was within the range of 0.01 to 0.10. The quantum yield was calculated according to the equation:

$$\varphi_x = \varphi_{st} \left( \frac{r_x}{r_{st}} \right) \left( \frac{\eta_x}{\eta_{st}} \right)^2$$

where the subscripts *st* and *x* denote standard and test respectively,  $\varphi_x$  is the fluorescence quantum yield, *r* is the gradient from the plot of integrated fluorescence intensity vs. absorbance, and  $\eta$  is the refractive index of the solvent.  $\varphi_{st} = 0.95$  in EtOH.

$$\varphi(\mathbf{20}) = 0.35$$

## 4. NMR Spectra

### Red Bodipy derivatives

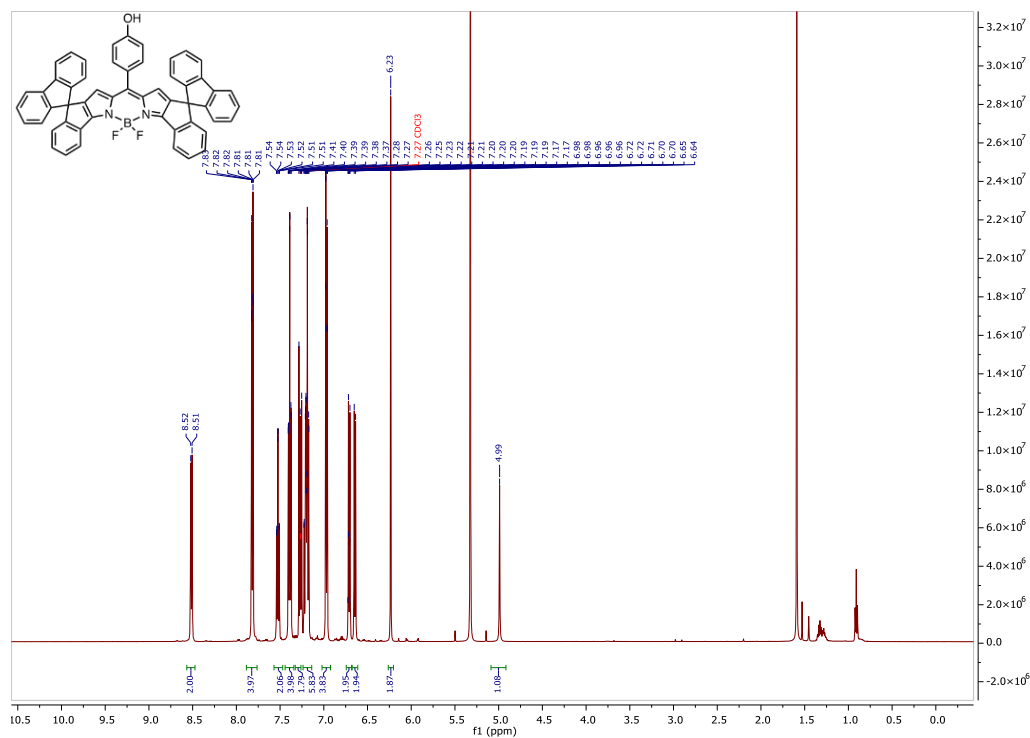

Figure S 42 <sup>1</sup>H-NMR spectrum of **10** in CDCl<sub>3</sub>.

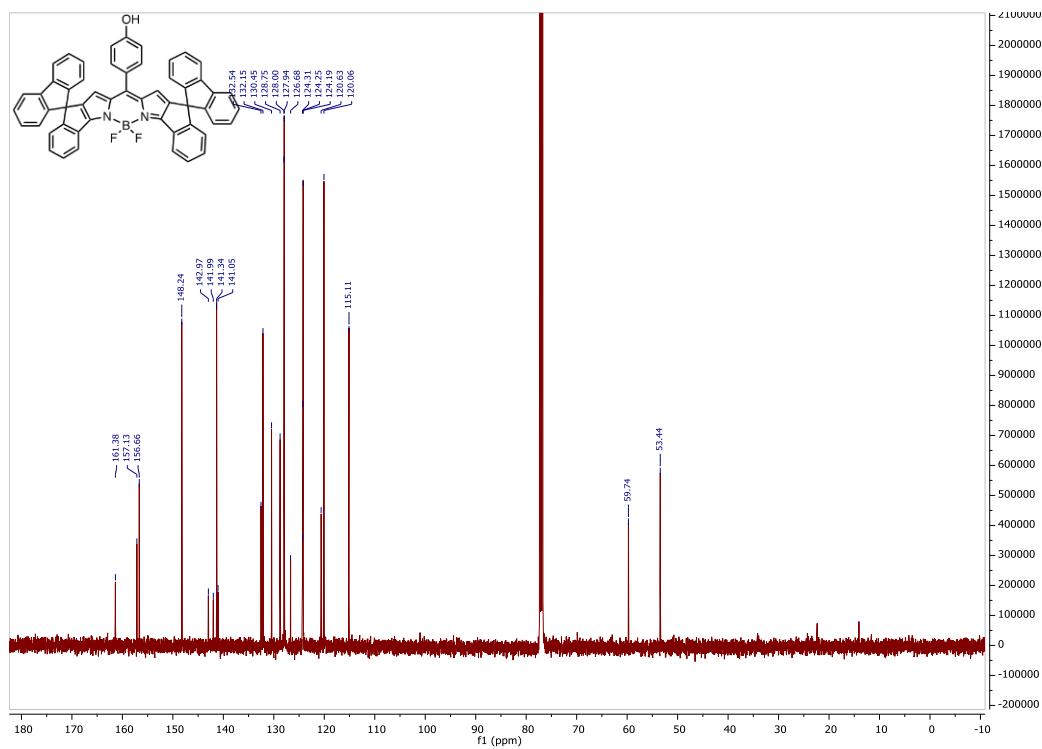

Figure S 43 <sup>13</sup>C-NMR spectrum of **10** in CDCl<sub>3</sub>.



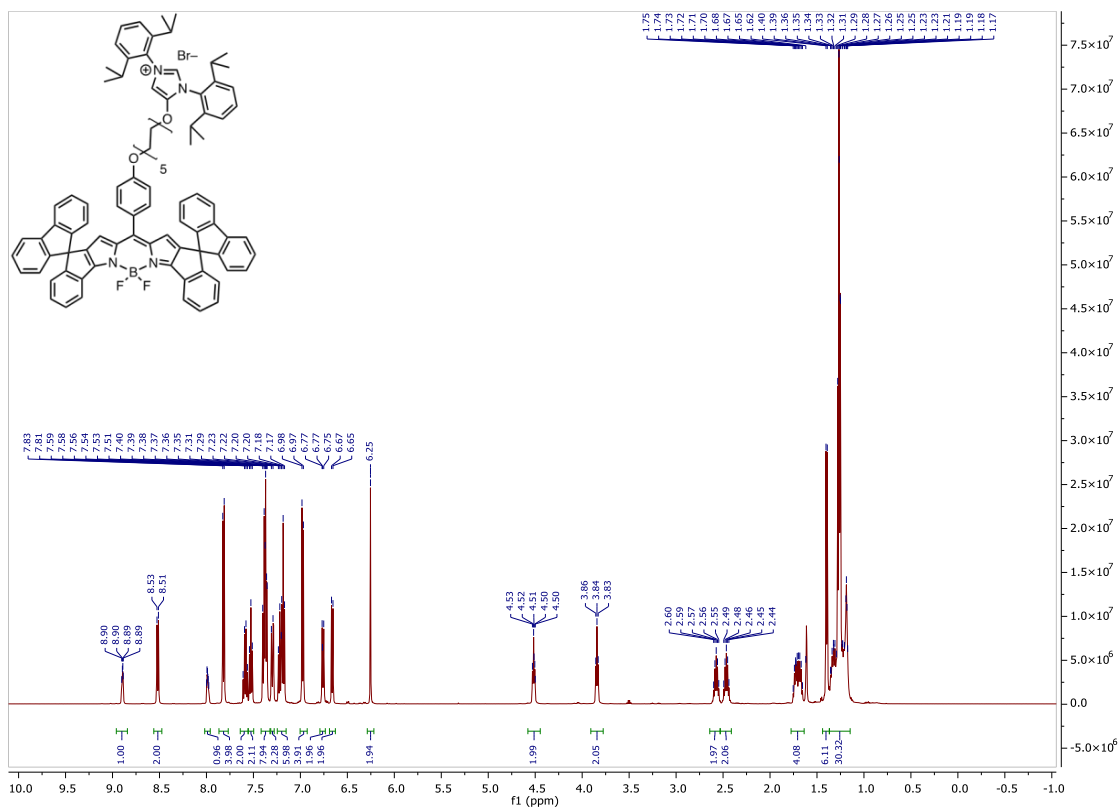

Figure S 46  $^1\text{H-NMR}$  spectrum of 5-HBr in  $\text{CDCl}_3$ .

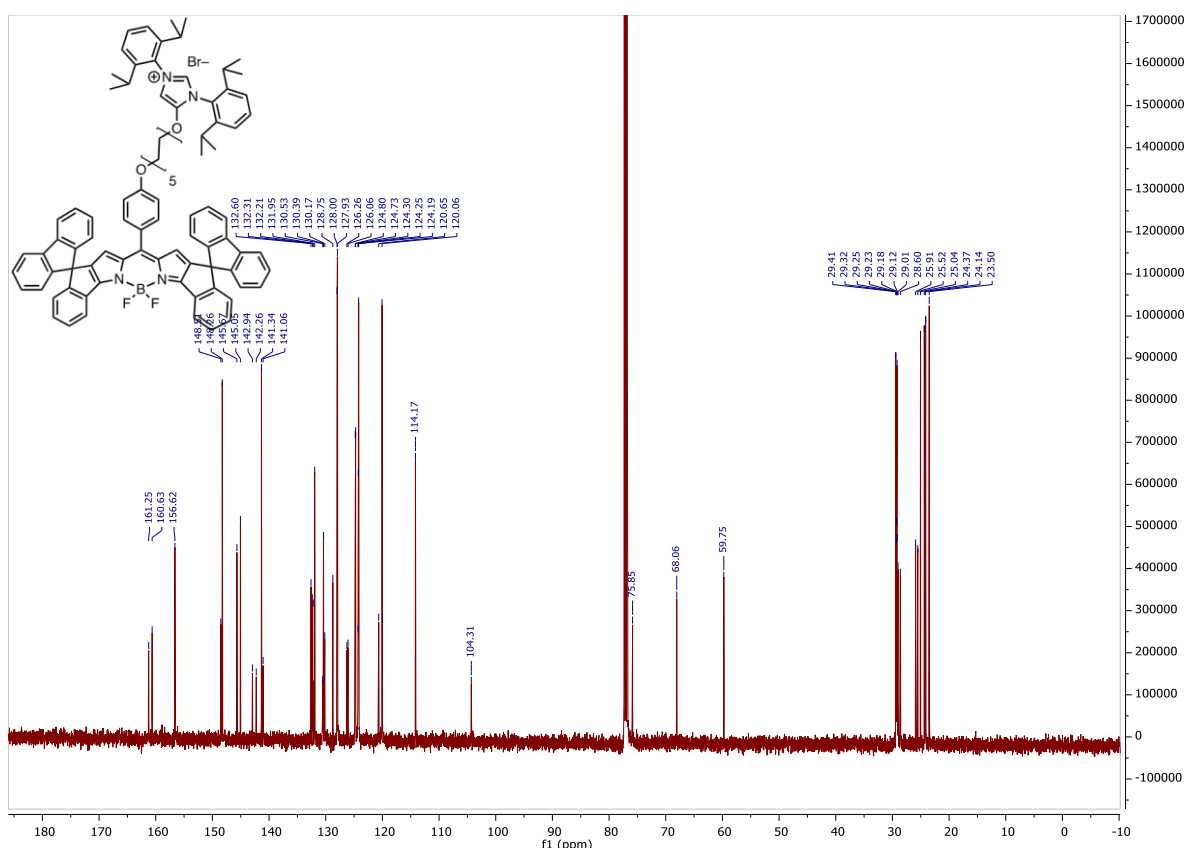

Figure S 47  $^{13}\text{C-NMR}$  spectrum of 5-HBr in  $\text{CDCl}_3$ .

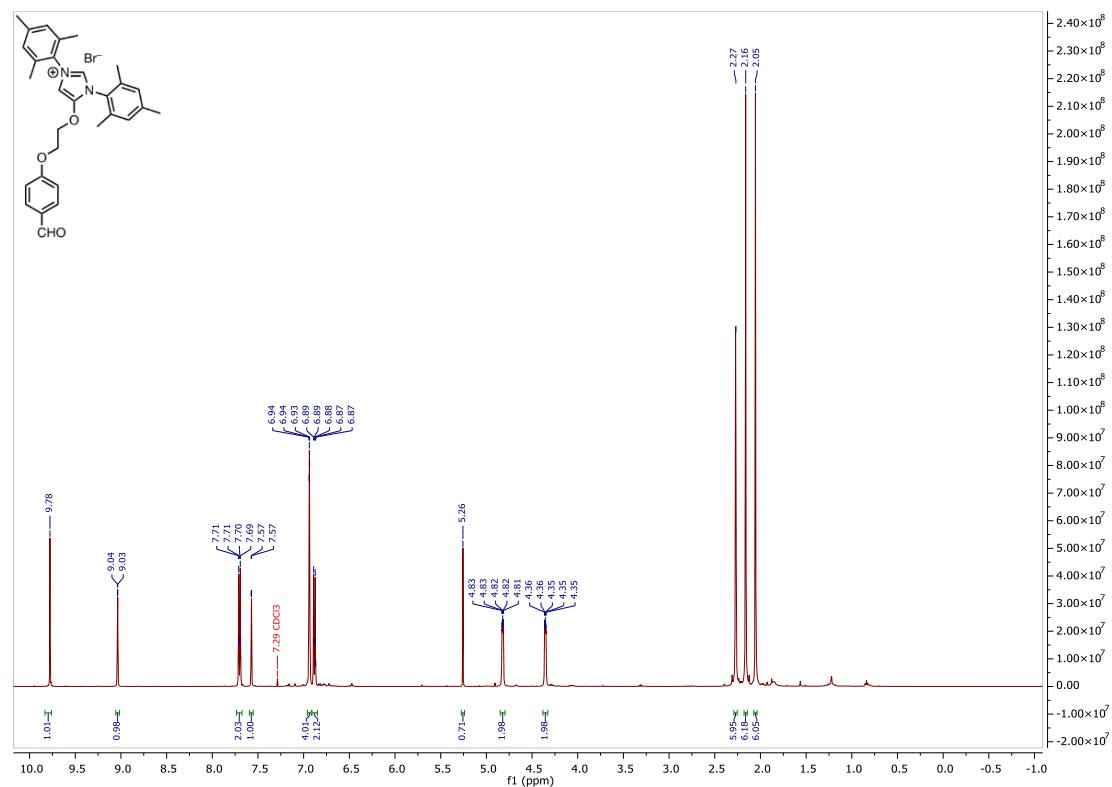

Figure S 48  $^1\text{H-NMR}$  spectrum of 7-HBr in  $\text{CDCl}_3$ .

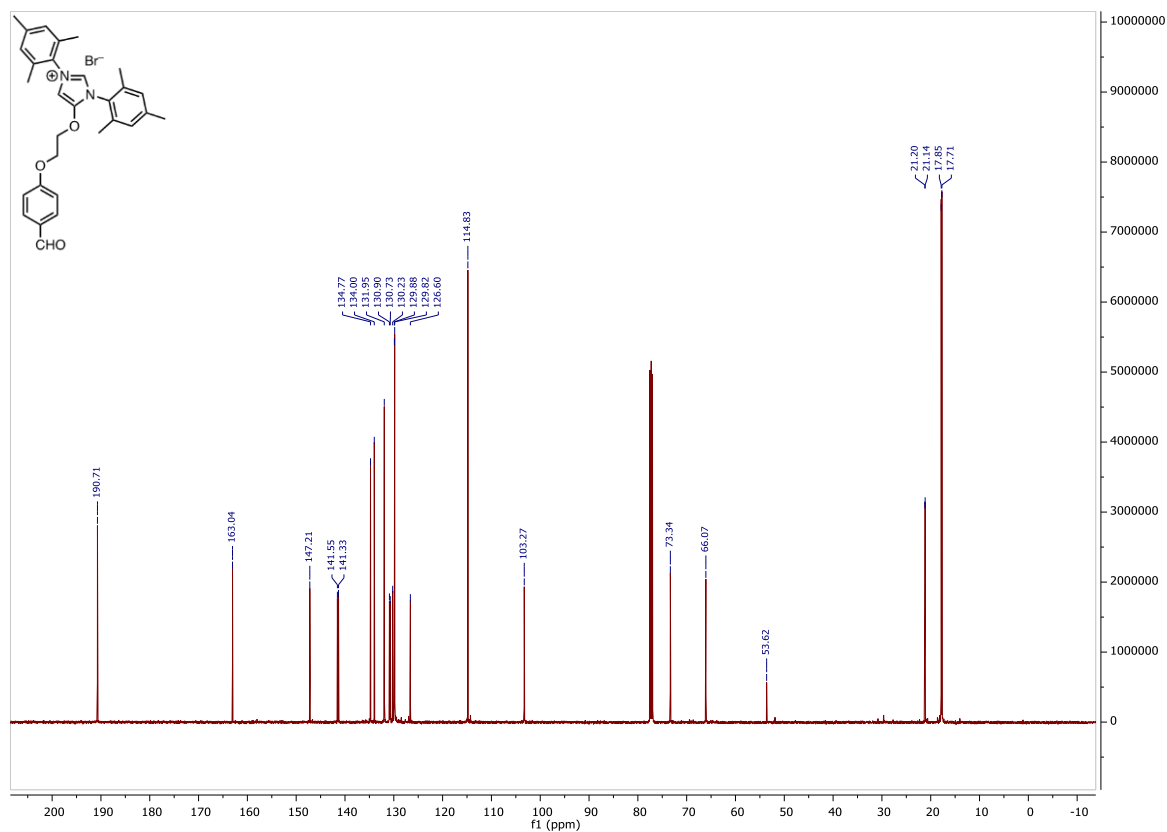

Figure S 49  $^{13}\text{C-NMR}$  spectrum of 7-HBr in  $\text{CDCl}_3$ .

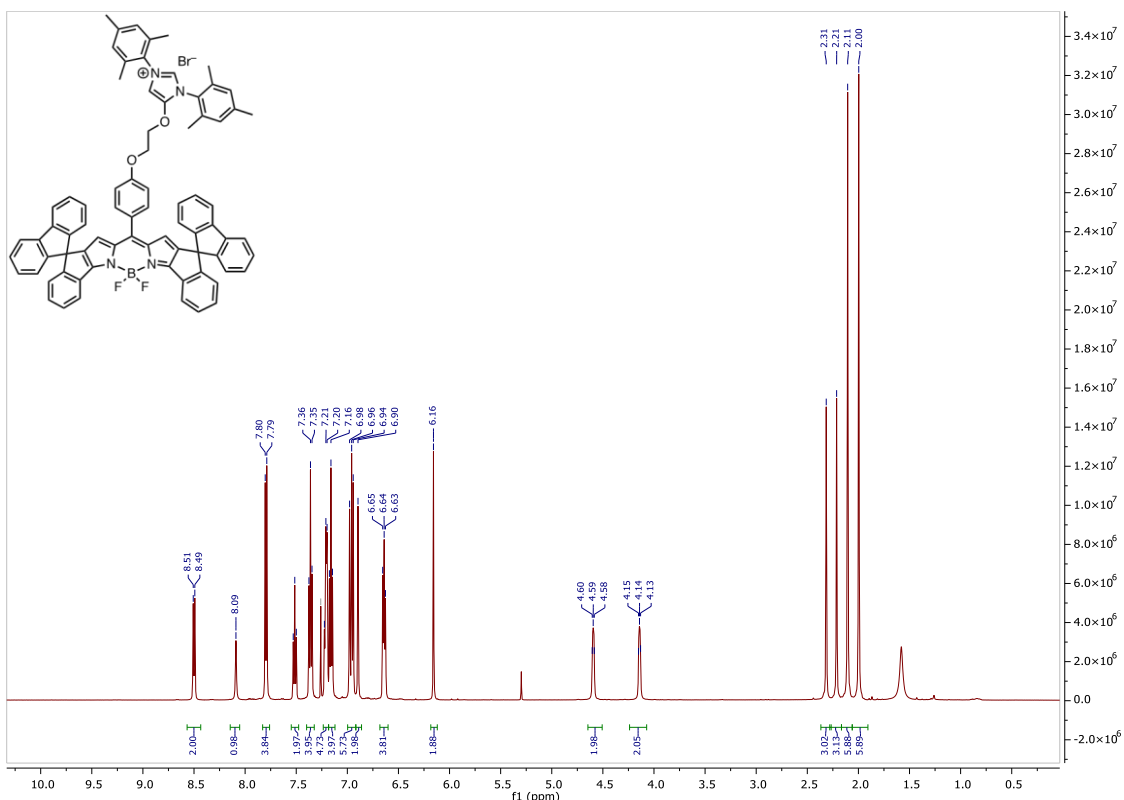

**Figure S 50**  $^1\text{H-NMR}$  spectrum of **8-HBr** in  $\text{CDCl}_3$ .

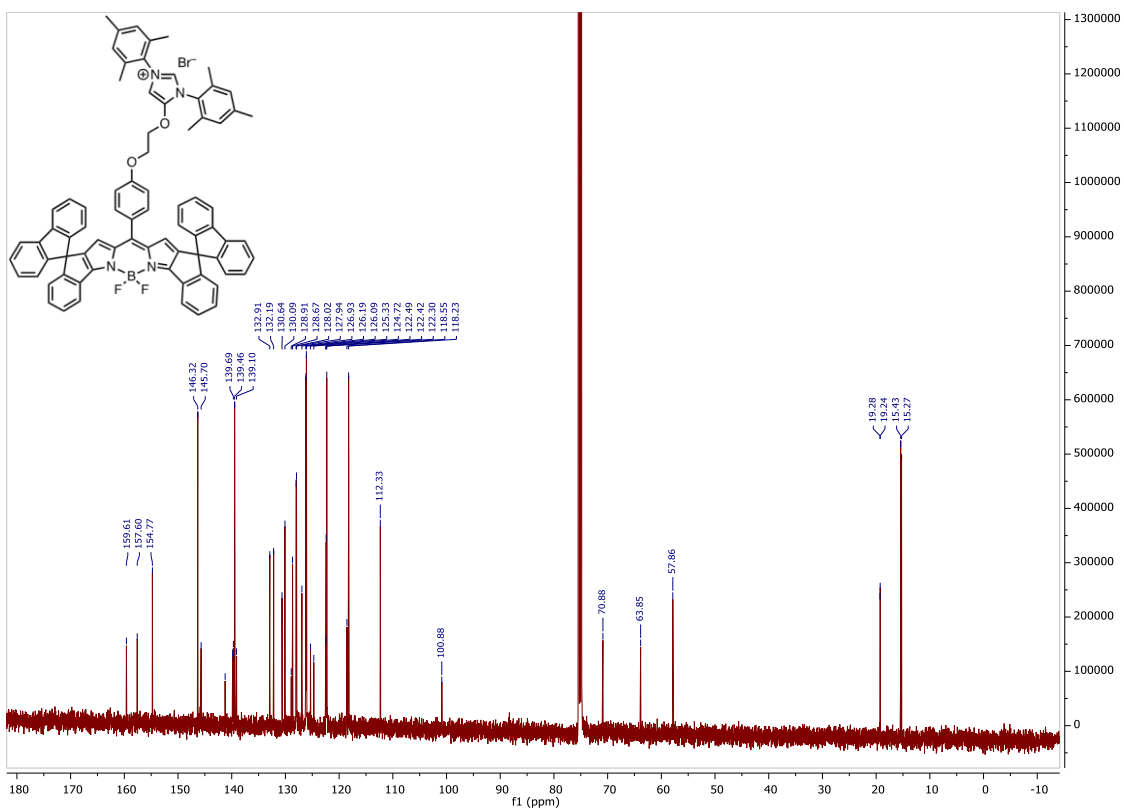

**Figure S 51**  $^{13}\text{C-NMR}$  spectrum of **8-HBr** in  $\text{CDCl}_3$ .



## Bodipy-tagged metal complexes

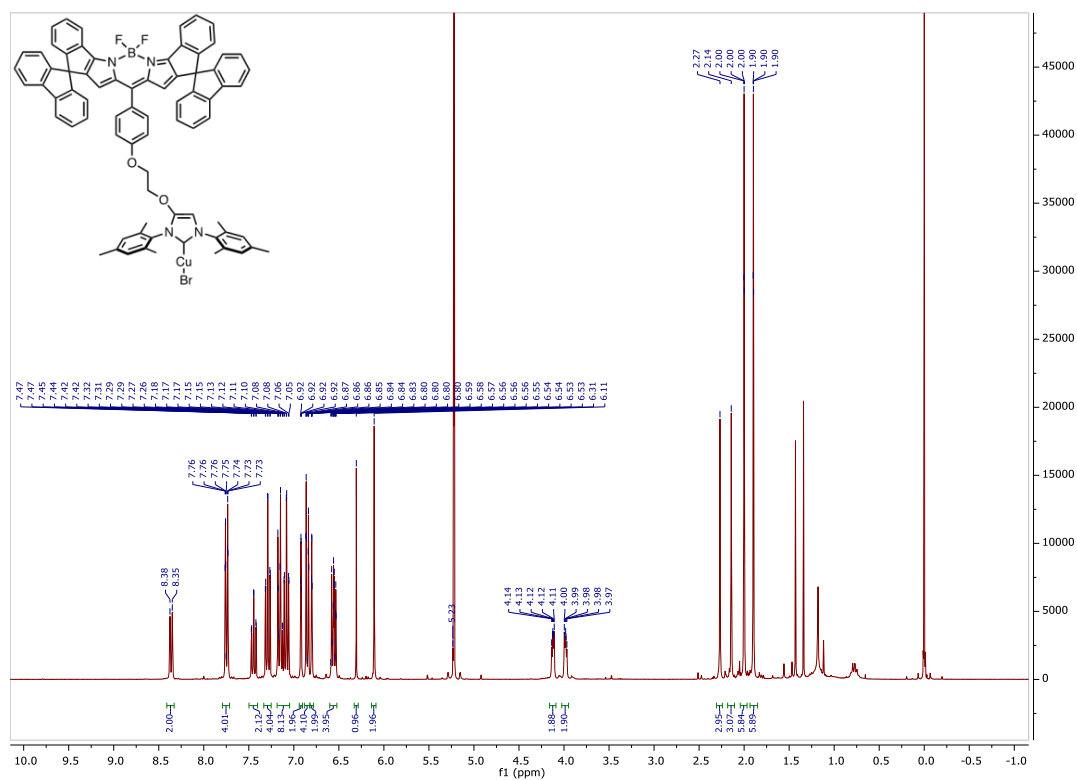

Figure S 52 <sup>1</sup>H-NMR spectrum of [CuBr(8)] in CD<sub>2</sub>Cl<sub>2</sub>.

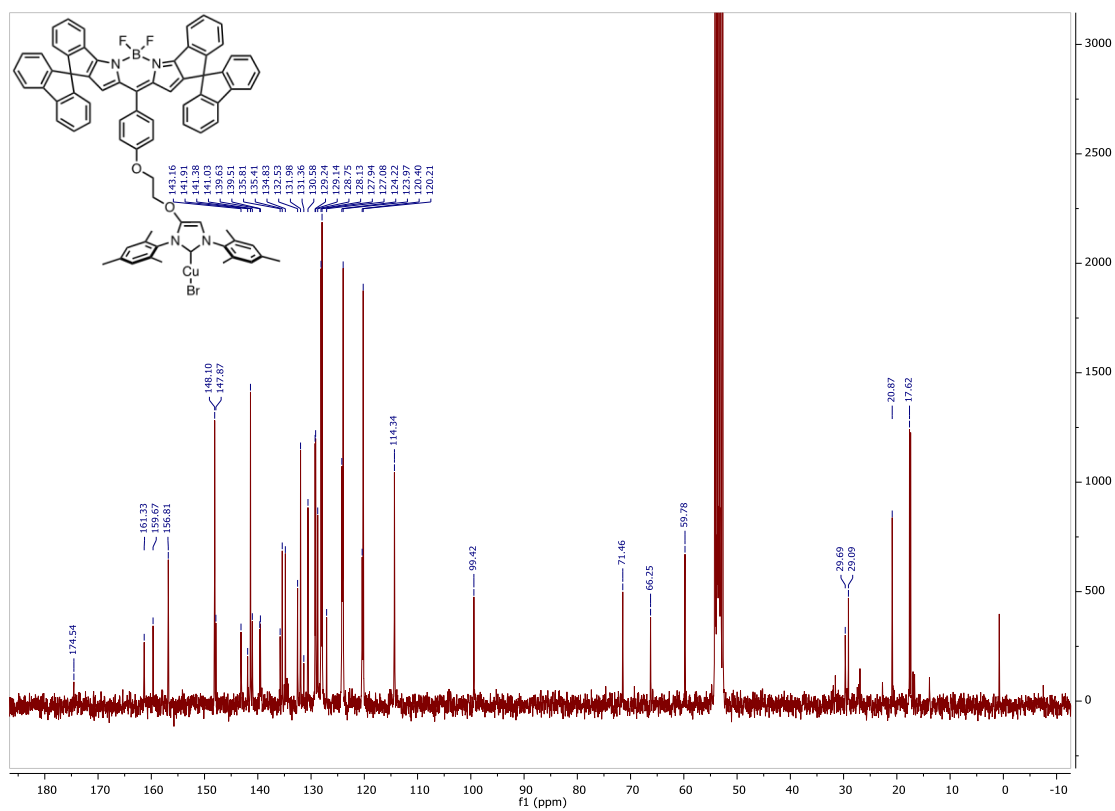

Figure S 53 <sup>13</sup>C-NMR spectrum of [CuBr(8)] in CD<sub>2</sub>Cl<sub>2</sub>.

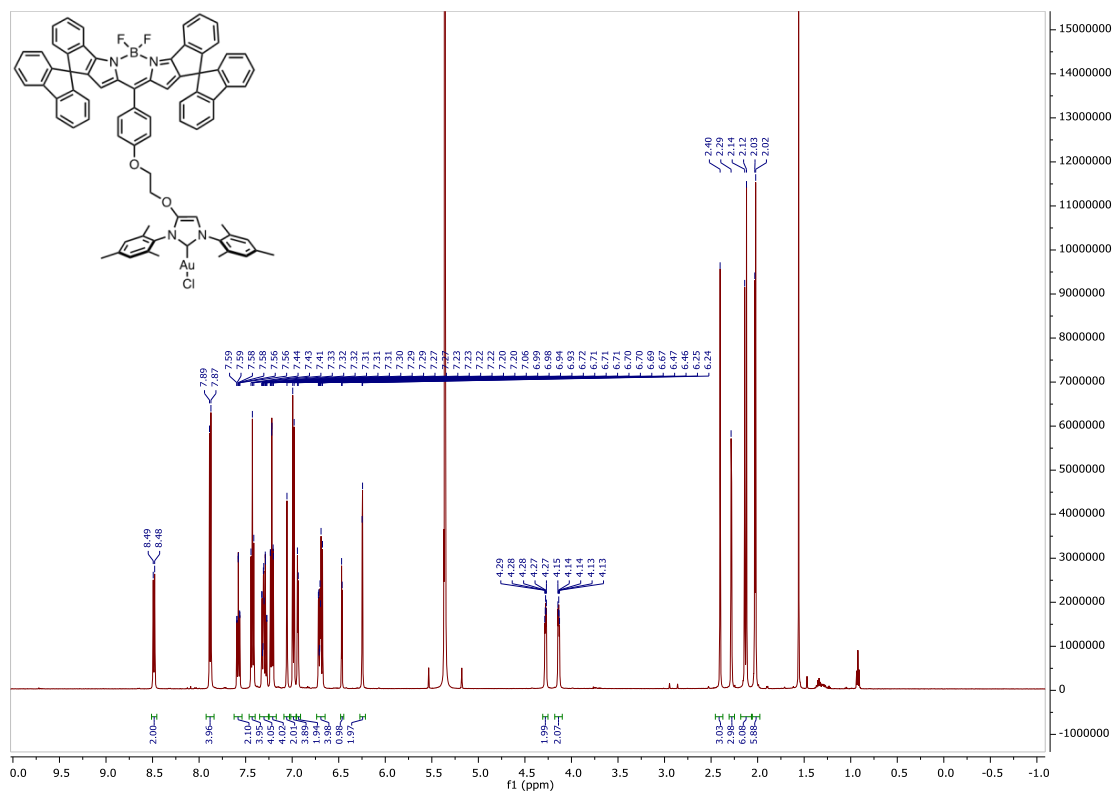

**Figure S 54**  $^1\text{H-NMR}$  spectrum of  $[\text{AuCl}(\mathbf{8})]$  in  $\text{CD}_2\text{Cl}_2$ .

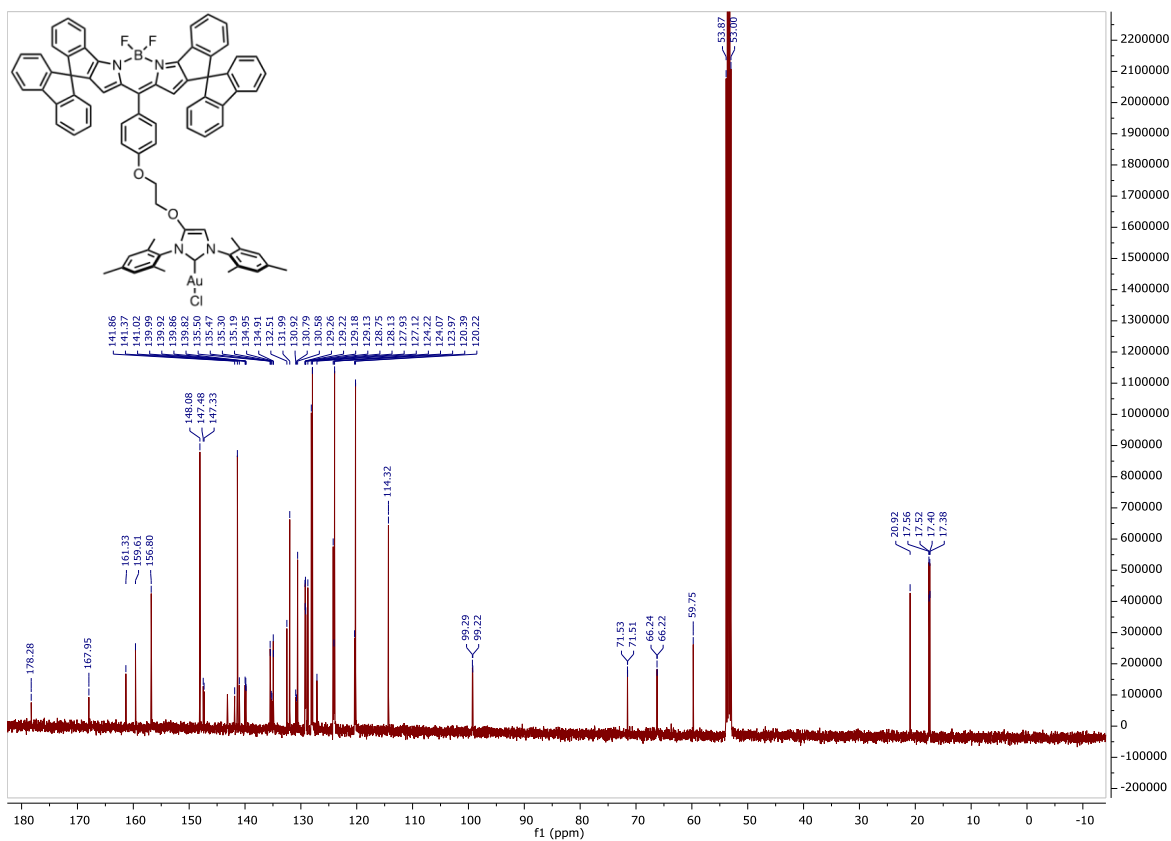

**Figure S 55**  $^{13}\text{C-NMR}$  spectrum of  $[\text{AuCl}(\mathbf{8})]$  in  $\text{CD}_2\text{Cl}_2$ .

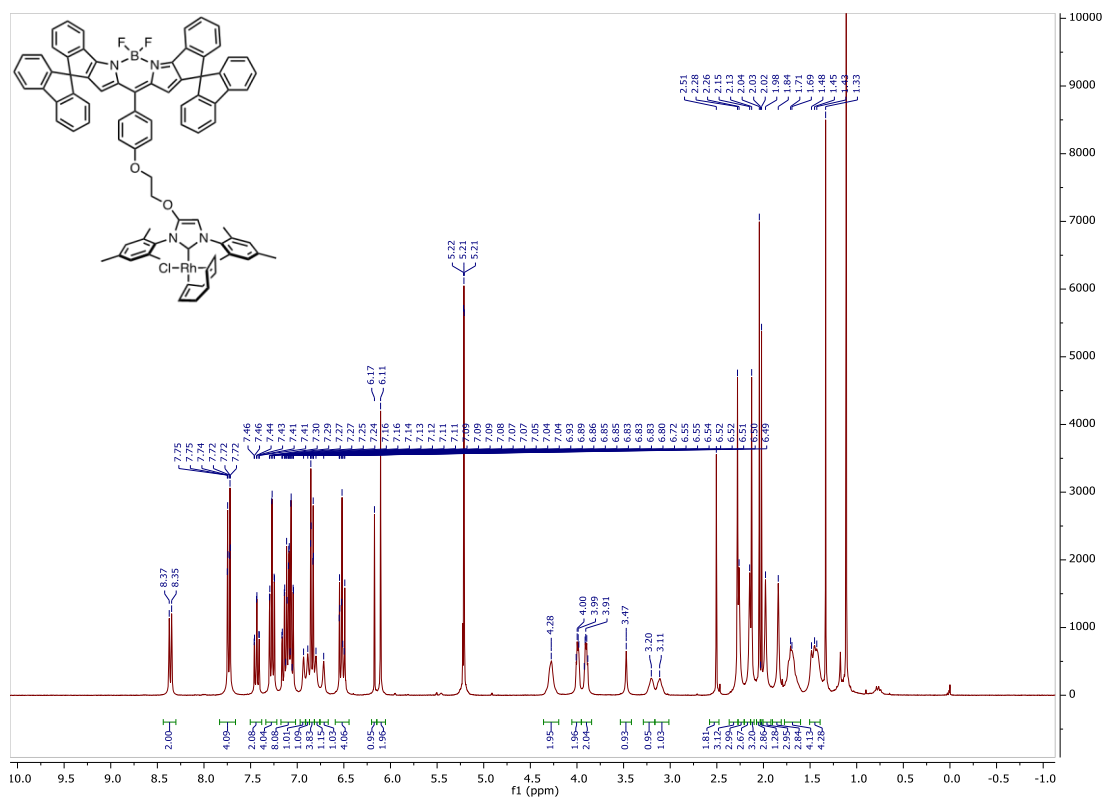

Figure S 56  $^1\text{H-NMR}$  spectrum of  $[\text{RhCl}(\text{cod})(\mathbf{8})]$  in  $\text{CD}_2\text{Cl}_2$ .

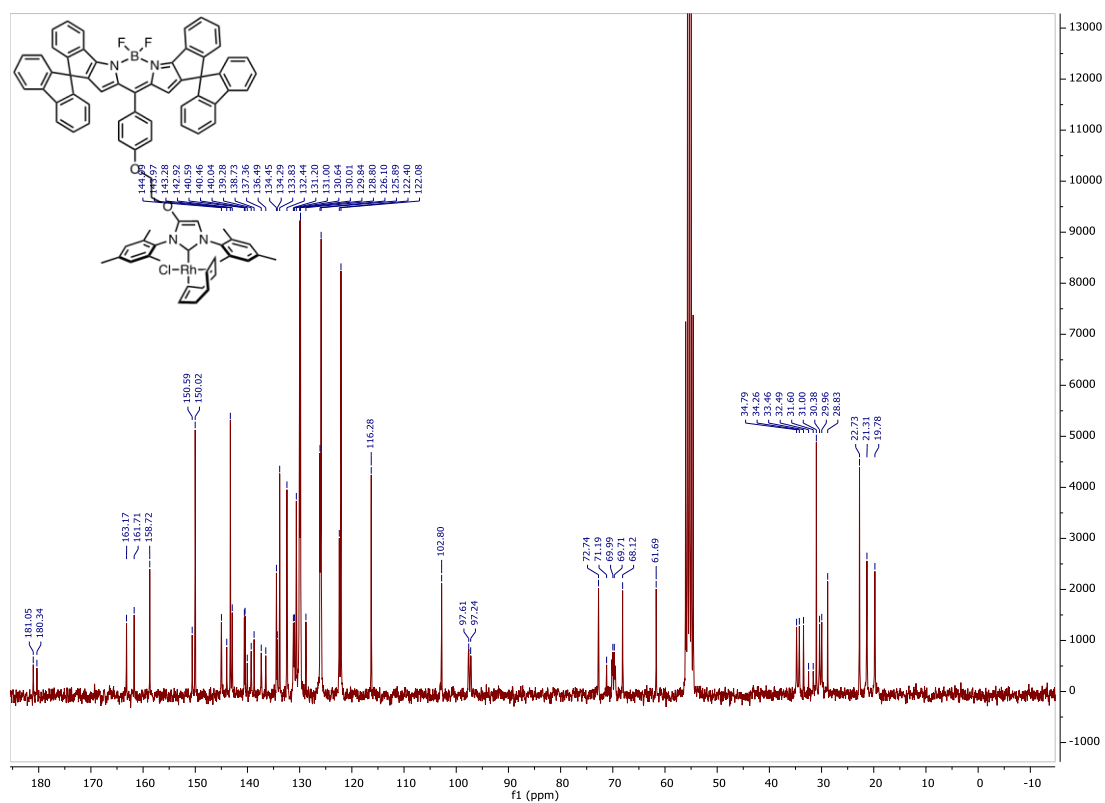

Figure S 57  $^{13}\text{C-NMR}$  spectrum of  $[\text{RhCl}(\text{cod})(\mathbf{8})]$  in  $\text{CD}_2\text{Cl}_2$ .



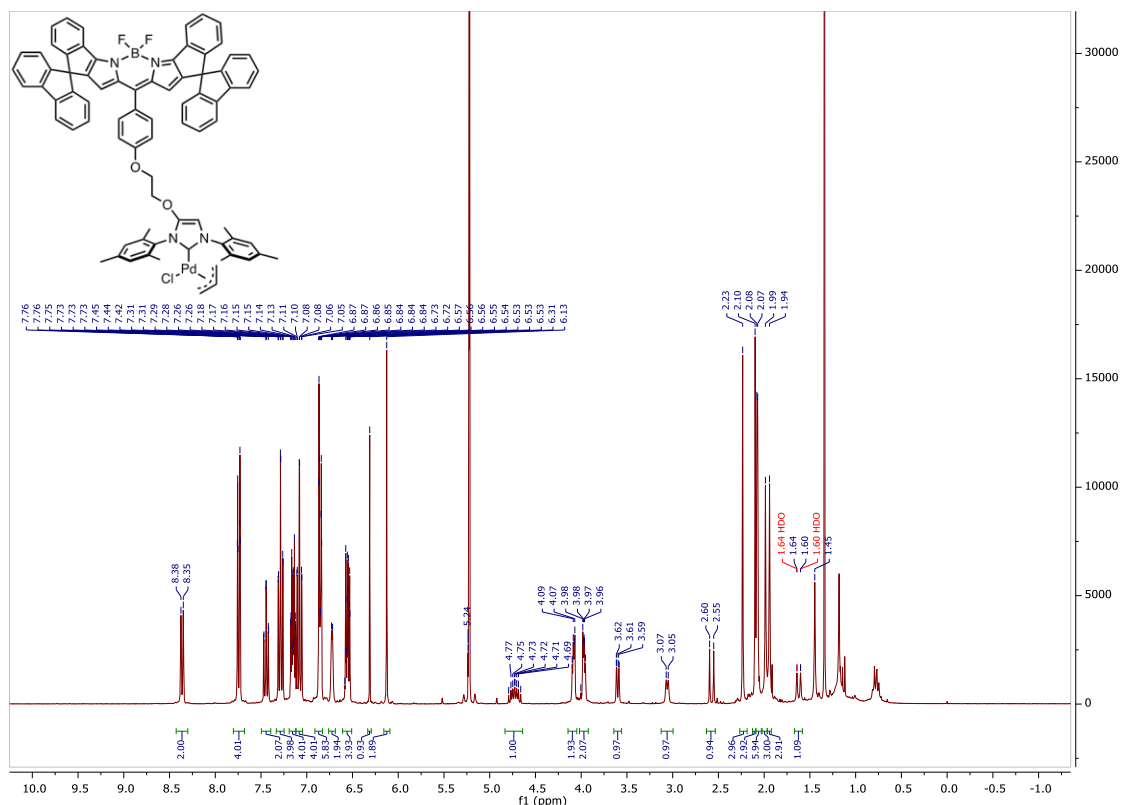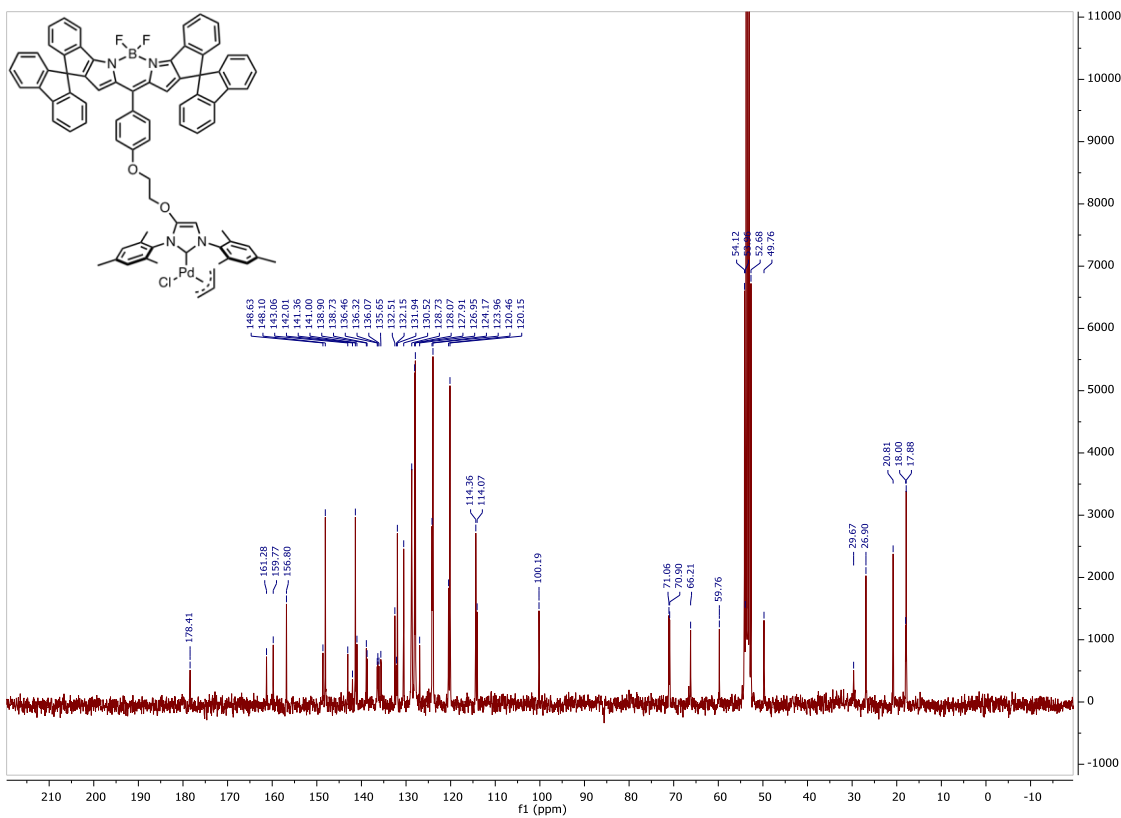

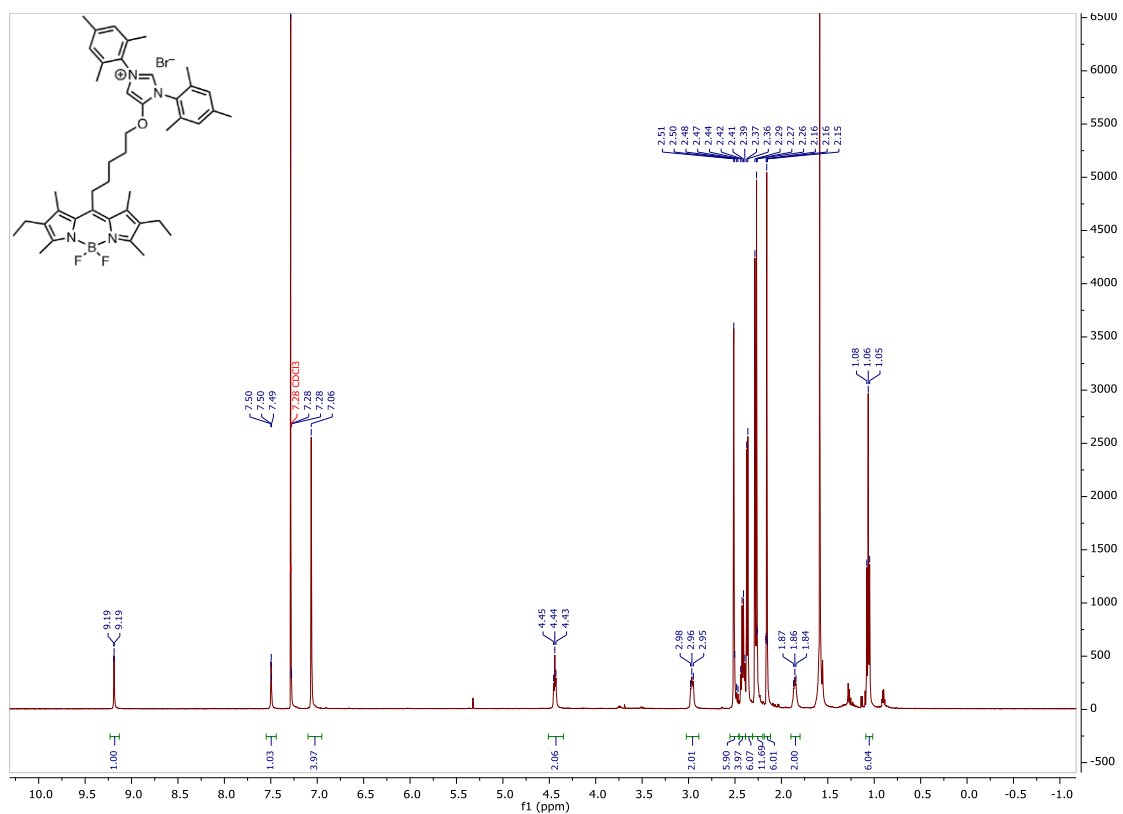

Figure S 62  $^1\text{H-NMR}$  spectrum of **9** in  $\text{CDCl}_3$ .

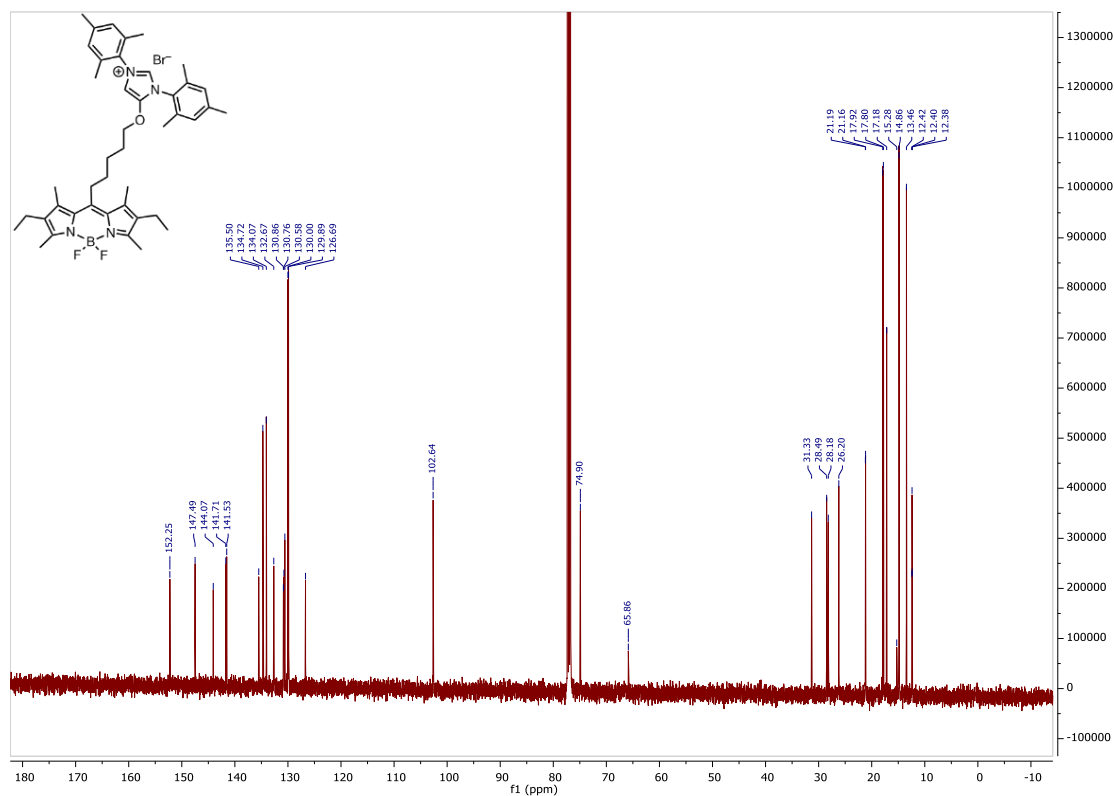

Figure S 63  $^{13}\text{C-NMR}$  spectrum of **9** in  $\text{CDCl}_3$ .

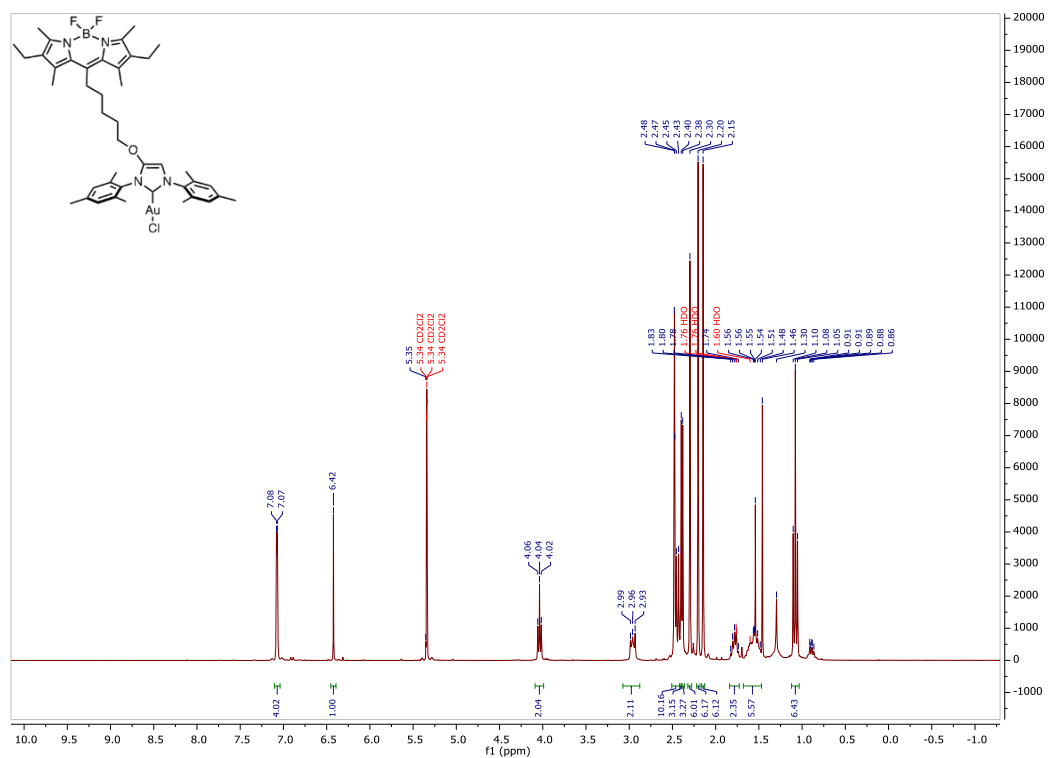

Figure S 64  $^1\text{H-NMR}$  spectrum of [AuCl(9)] in  $\text{CD}_2\text{Cl}_2$ .

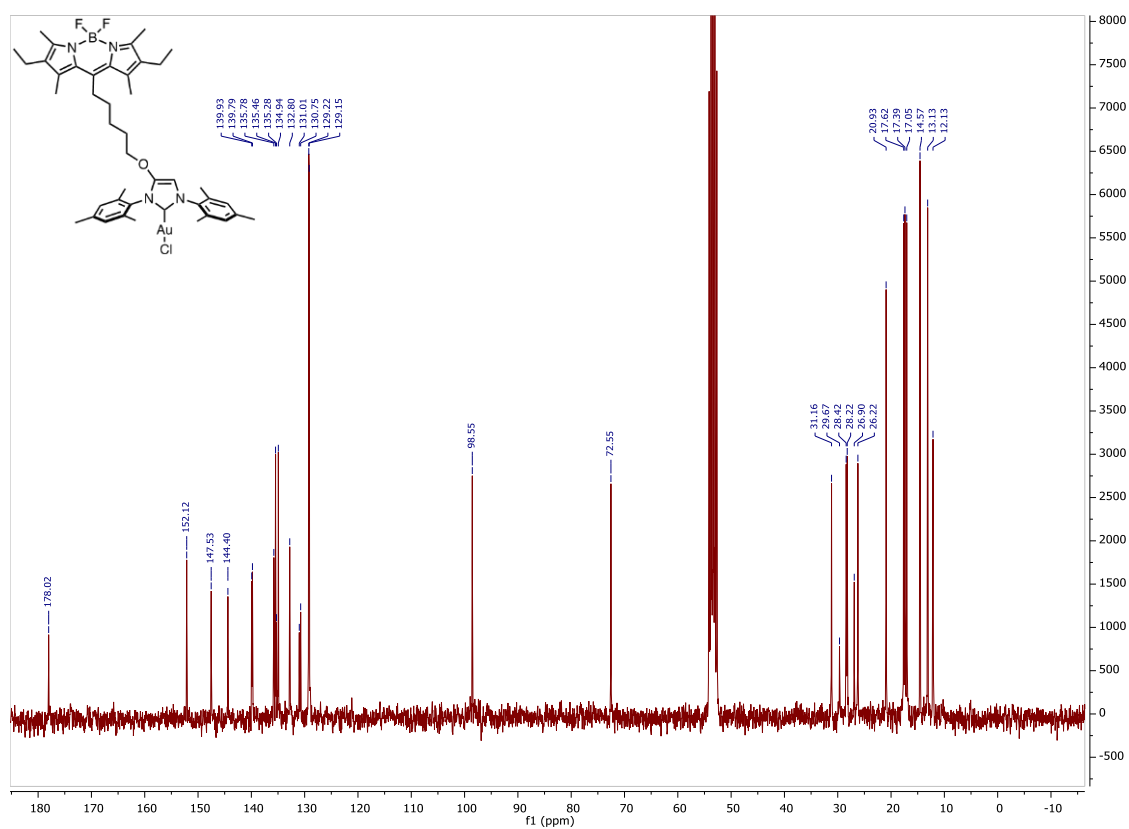

Figure S 65  $^{13}\text{C-NMR}$  spectrum of [AuCl(9)] in  $\text{CD}_2\text{Cl}_2$ .

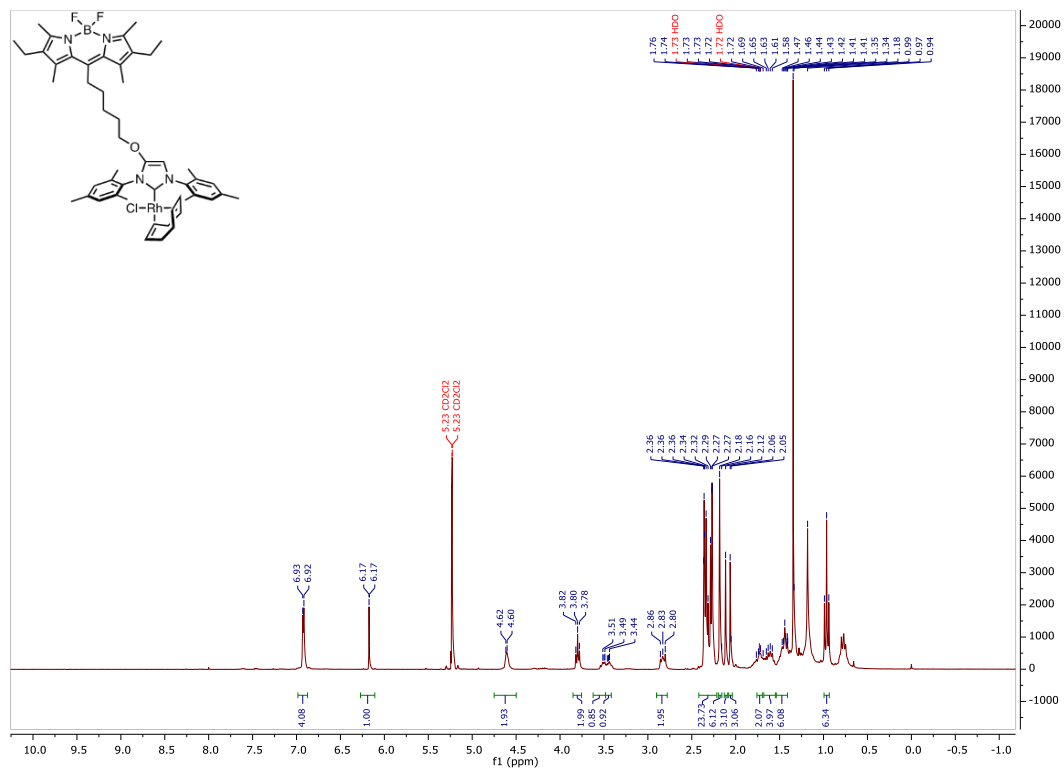

Figure S 66 <sup>1</sup>H-NMR spectrum of [RhCl(cod)(9)] in CD<sub>2</sub>Cl<sub>2</sub>.

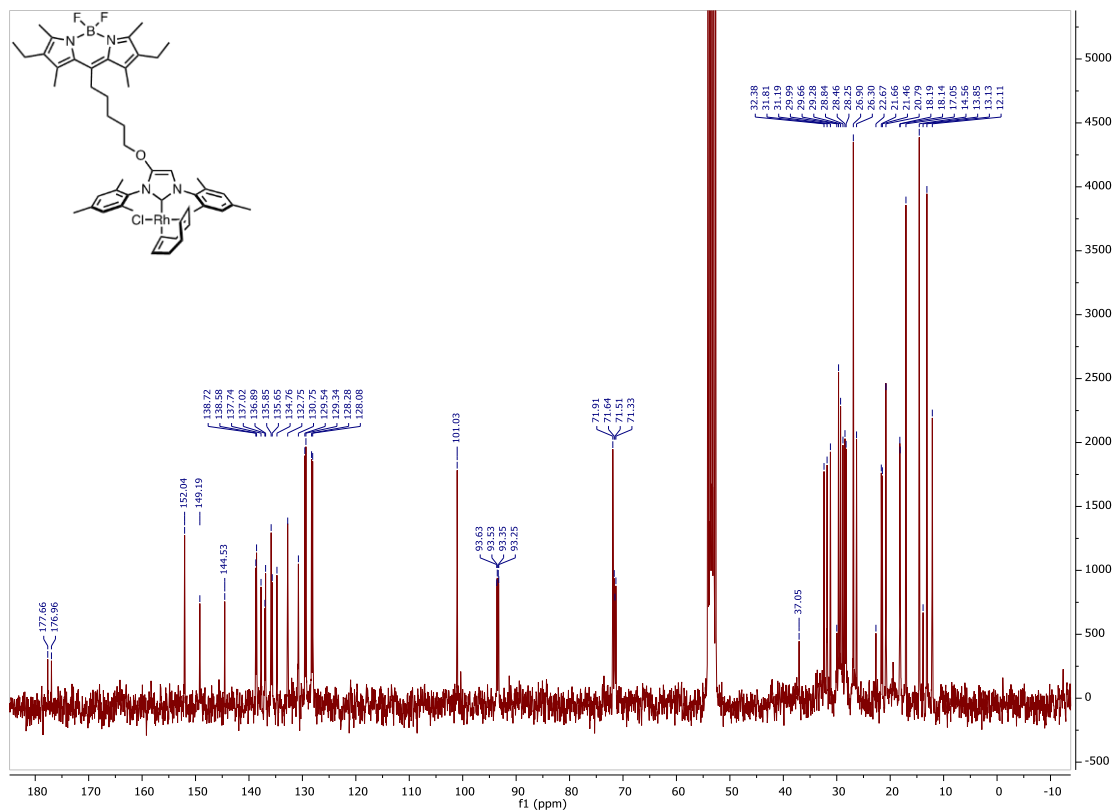

Figure S 67 <sup>13</sup>C-NMR spectrum of [RhCl(cod)(9)] in CD<sub>2</sub>Cl<sub>2</sub>.





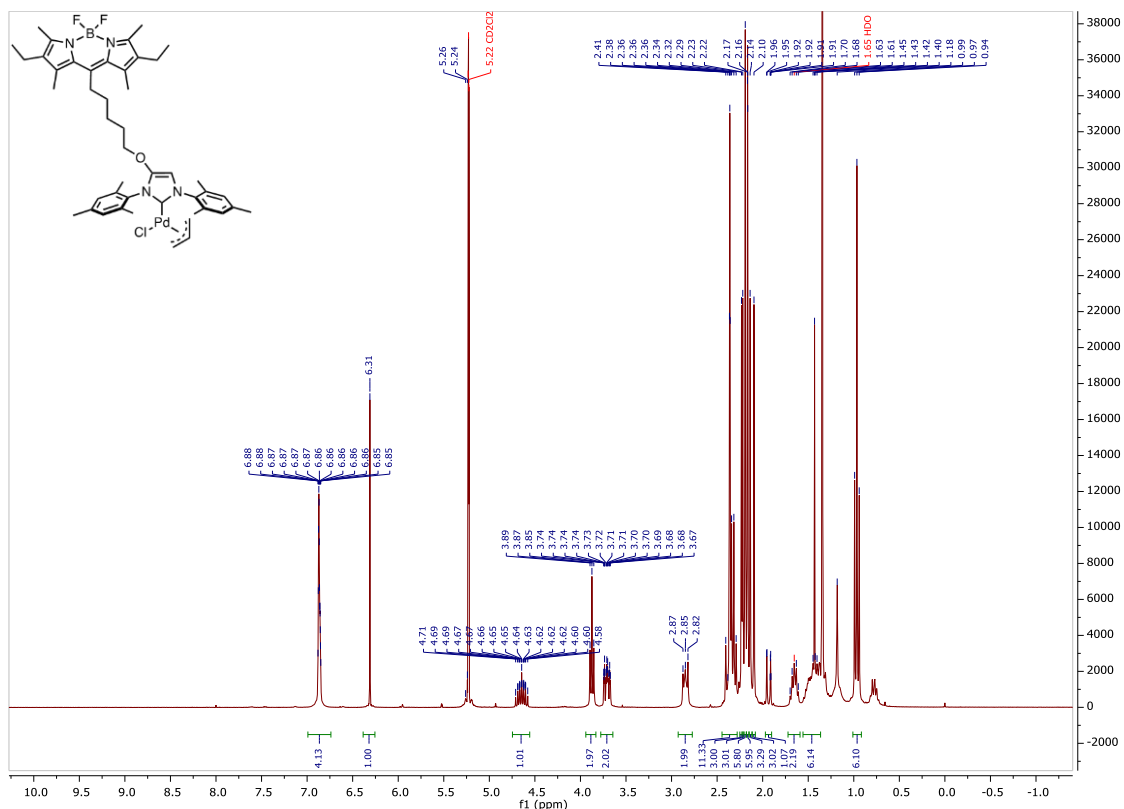

Figure S 70 <sup>1</sup>H-NMR spectrum of [Pd(allyl)Cl(9)] in CD<sub>2</sub>Cl<sub>2</sub>.

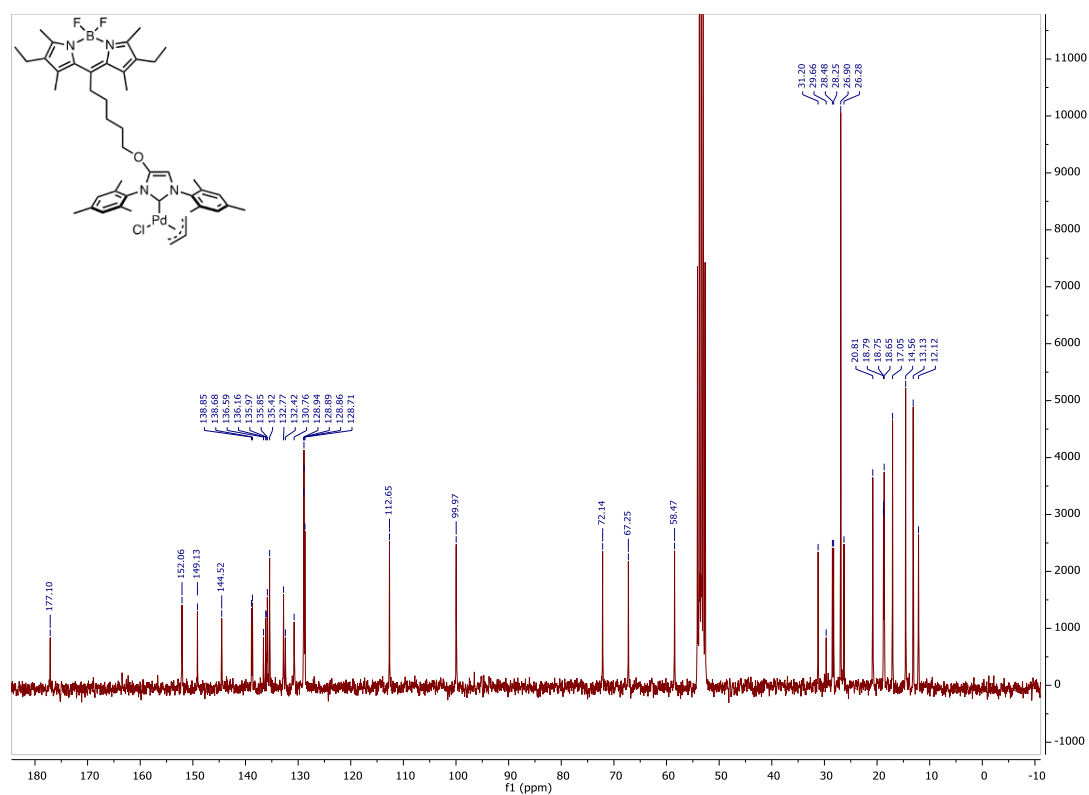

Figure S 71 <sup>13</sup>C-NMR spectrum of [Pd(allyl)Cl(9)] in CD<sub>2</sub>Cl<sub>2</sub>.

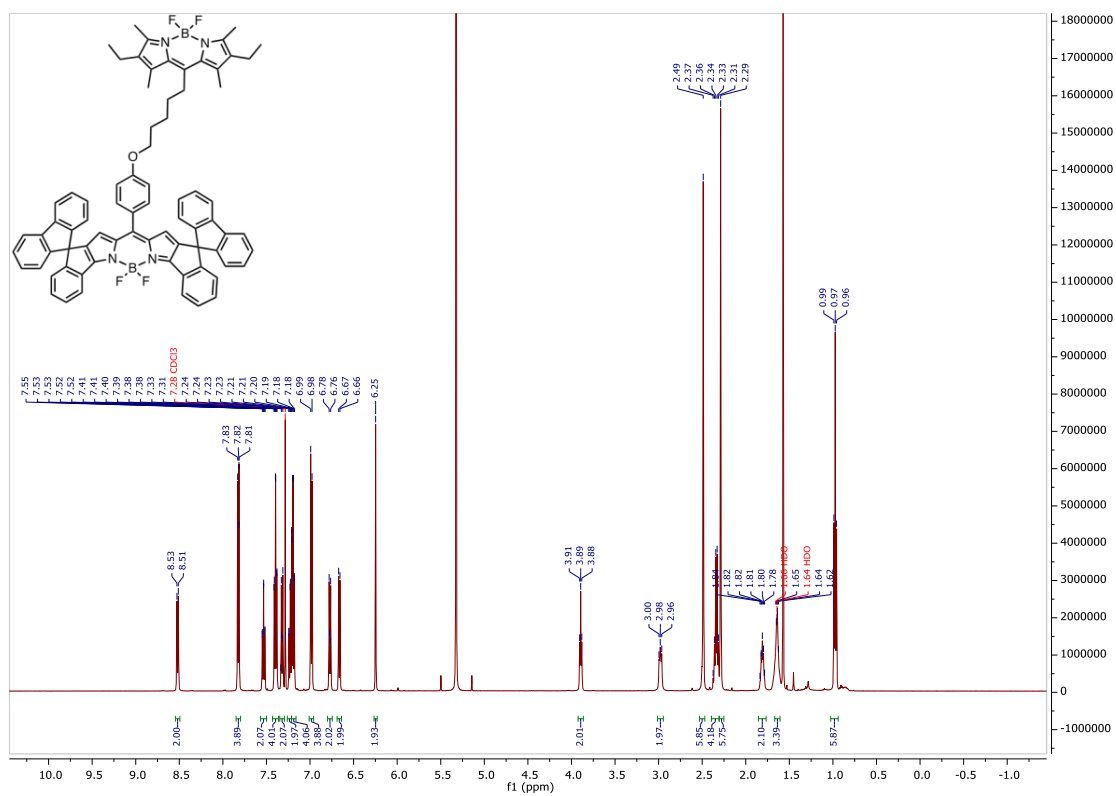

Figure S 72 <sup>1</sup>H-NMR spectrum of **12** in CDCl<sub>3</sub>.

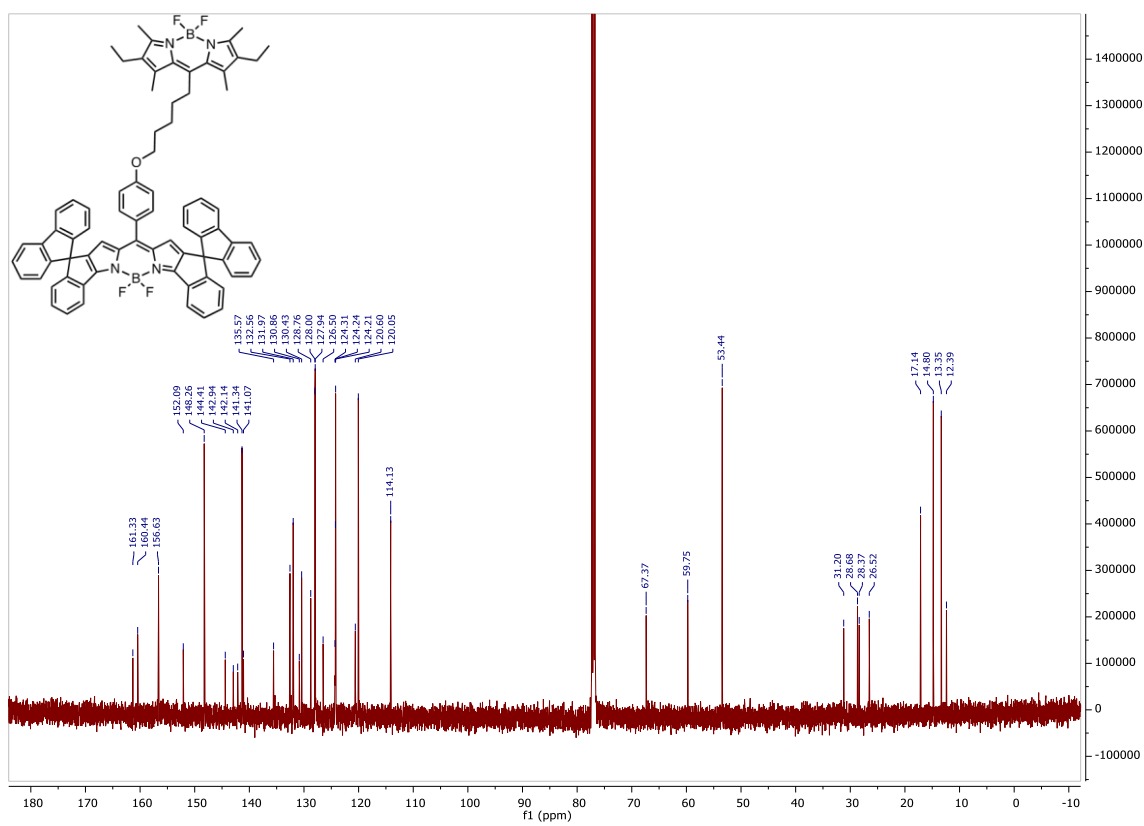

Figure S 73 <sup>13</sup>C-NMR spectrum of **12** in CDCl<sub>3</sub>.

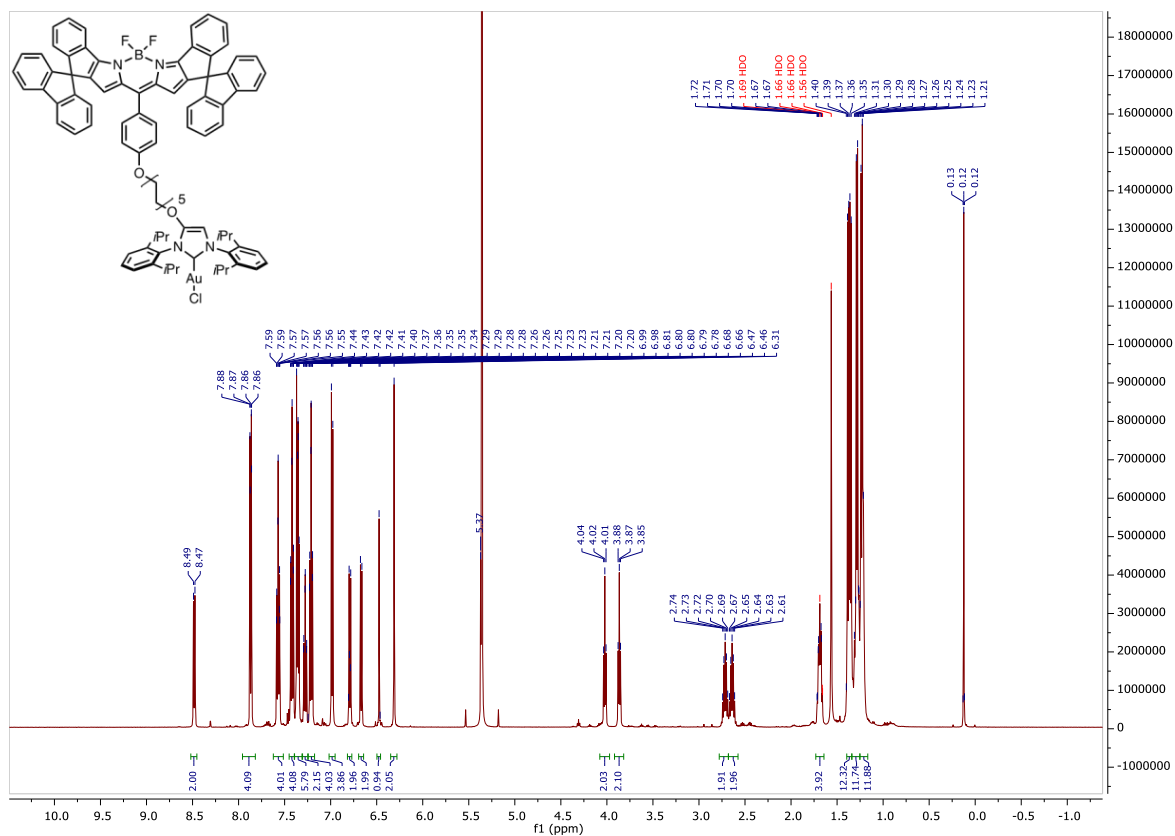

Figure S 74 <sup>1</sup>H-NMR spectrum of [AuCl(NHC<sub>red</sub>)] in CD<sub>2</sub>Cl<sub>2</sub>.

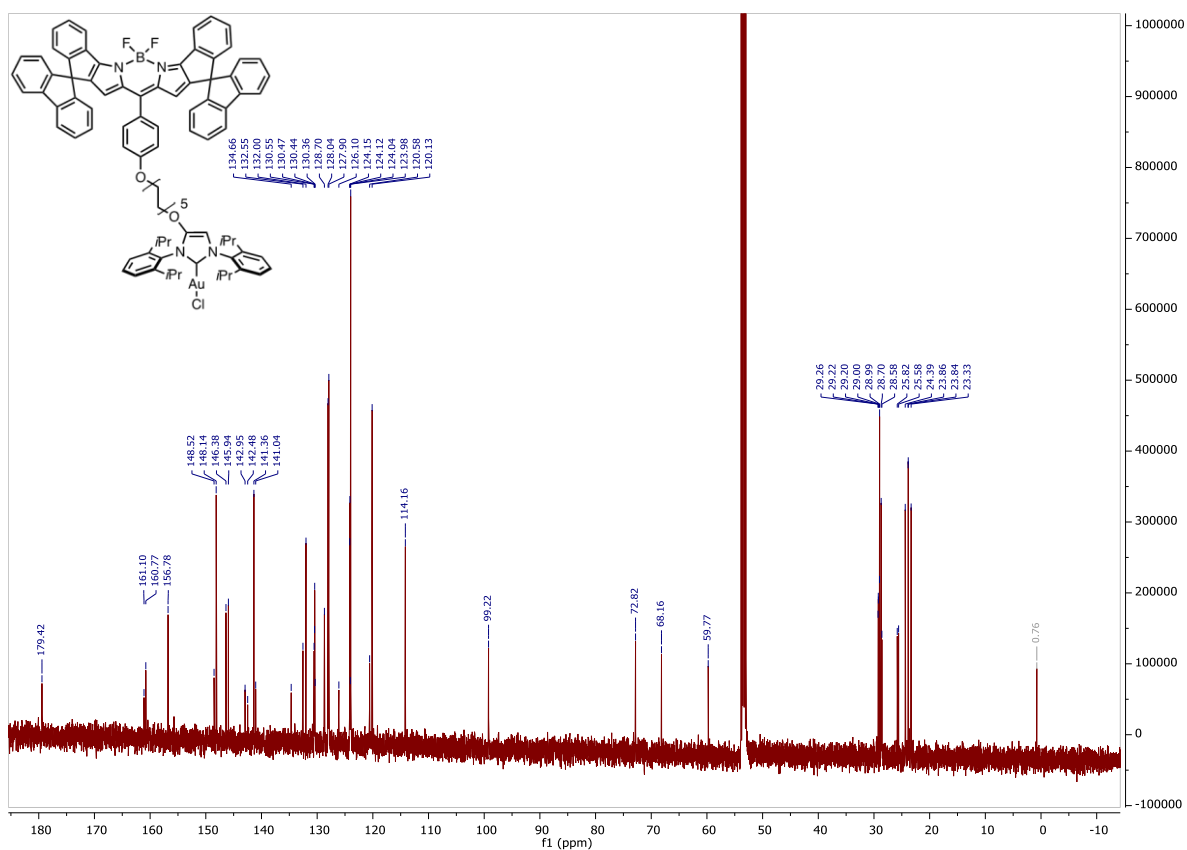

Figure S 75 <sup>13</sup>C-NMR spectrum of [AuCl(NHC<sub>red</sub>)] in CD<sub>2</sub>Cl<sub>2</sub>.

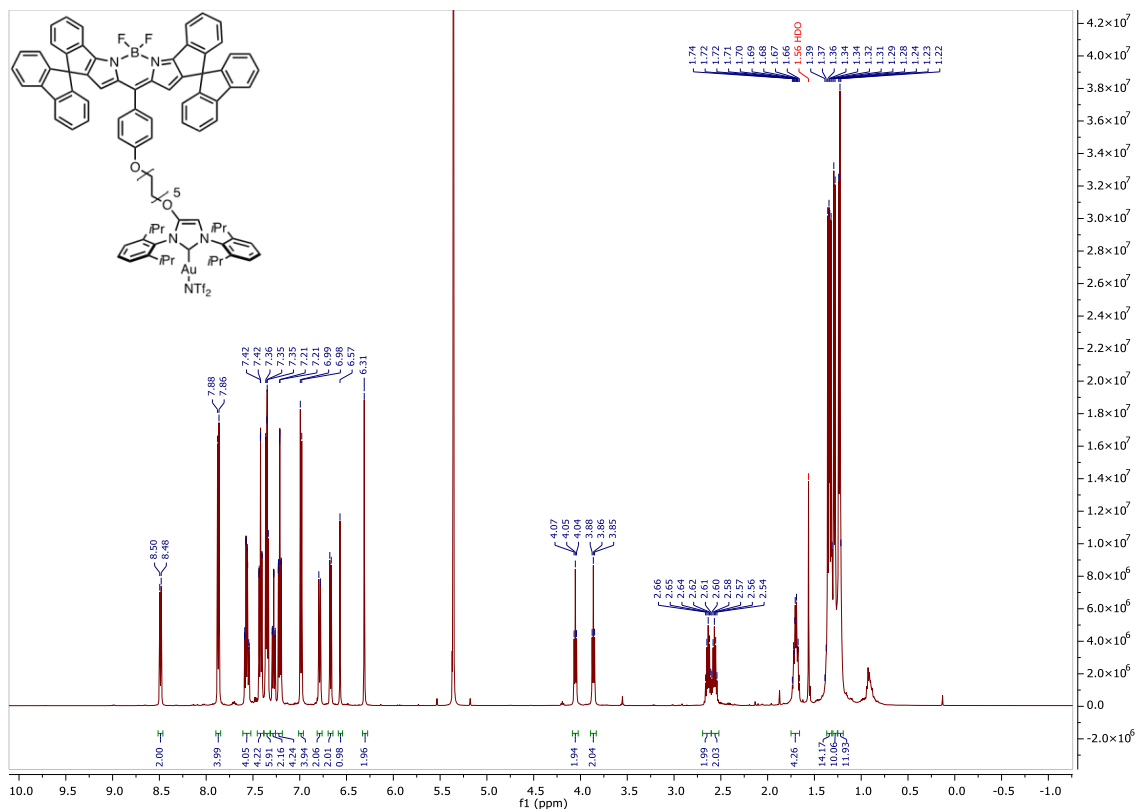

Figure S 76 <sup>1</sup>H-NMR spectrum of 14 in CD<sub>2</sub>Cl<sub>2</sub>.

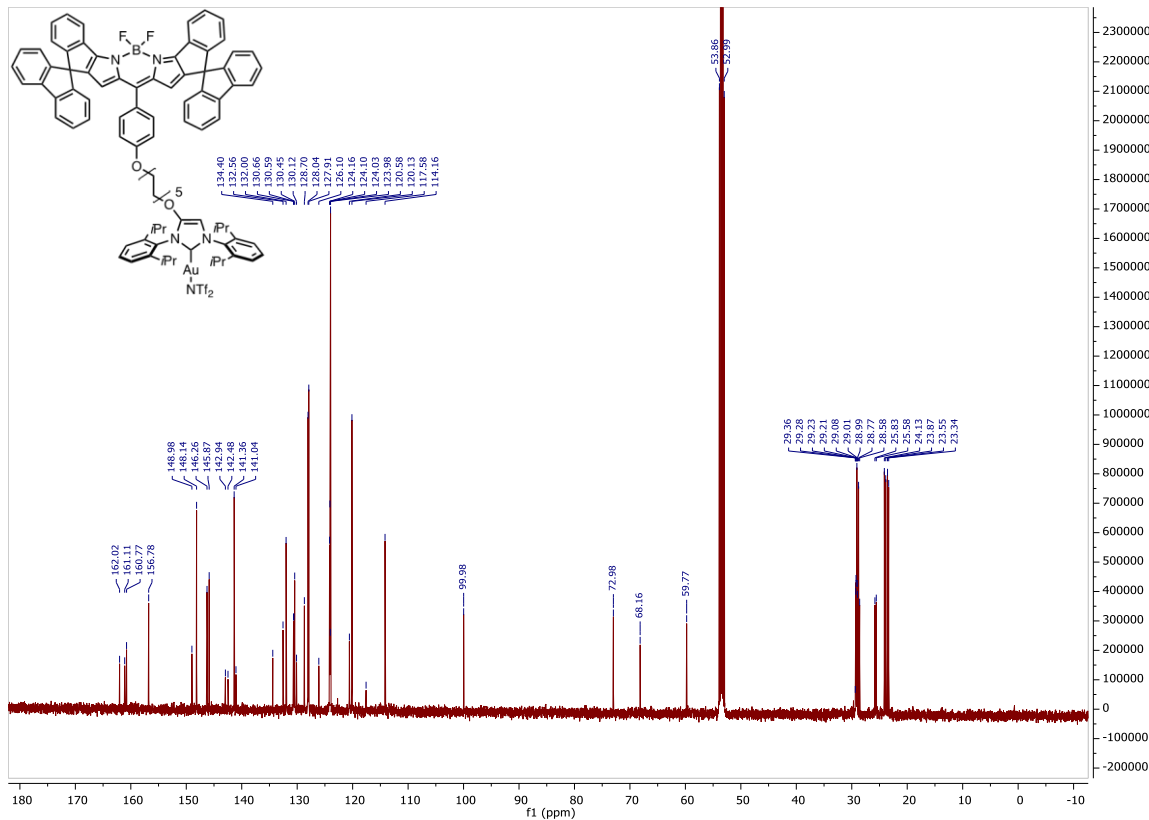

Figure S 77 <sup>13</sup>C-NMR spectrum of 14 in CD<sub>2</sub>Cl<sub>2</sub>.

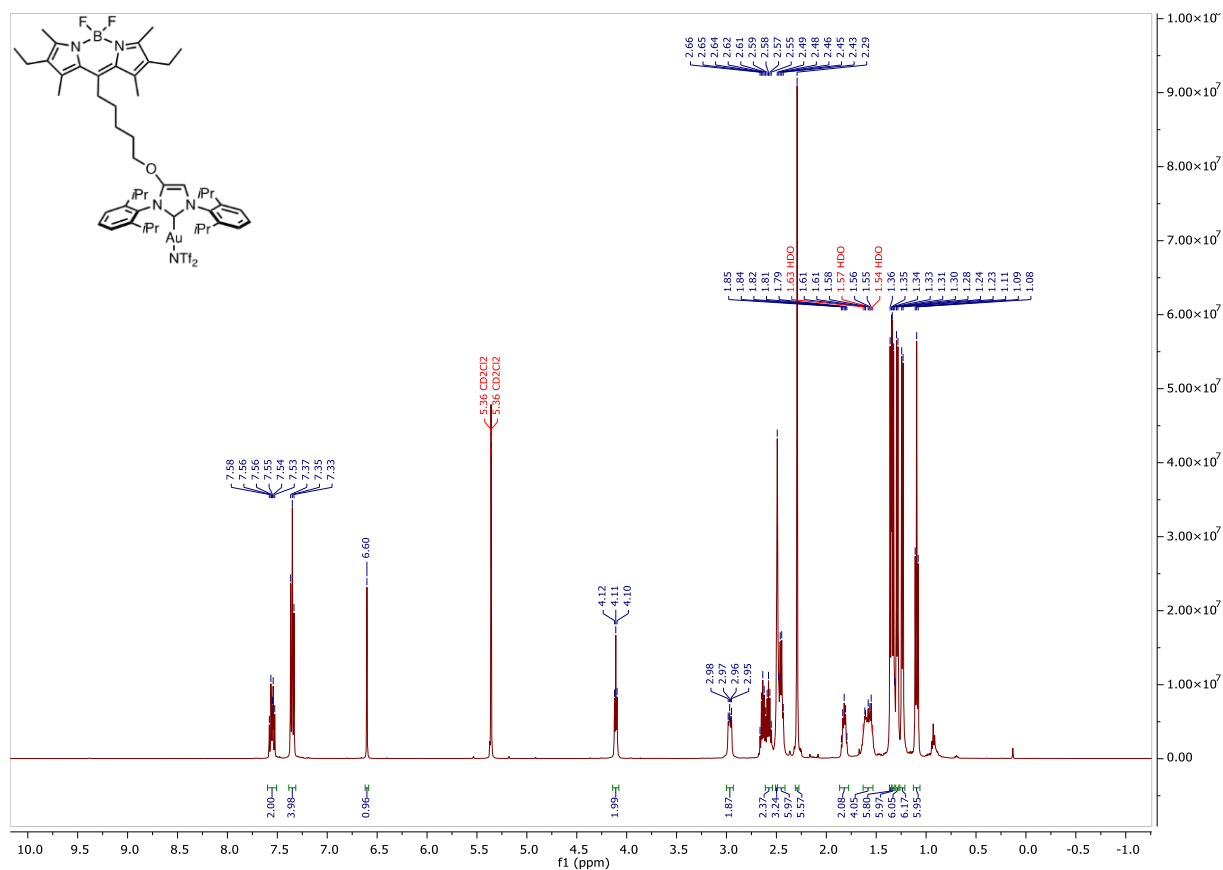

**Figure S 78**  $^1\text{H-NMR}$  spectrum of  $[\text{AuCl}(\text{NHC\_green})]$  in  $\text{CD}_2\text{Cl}_2$ .

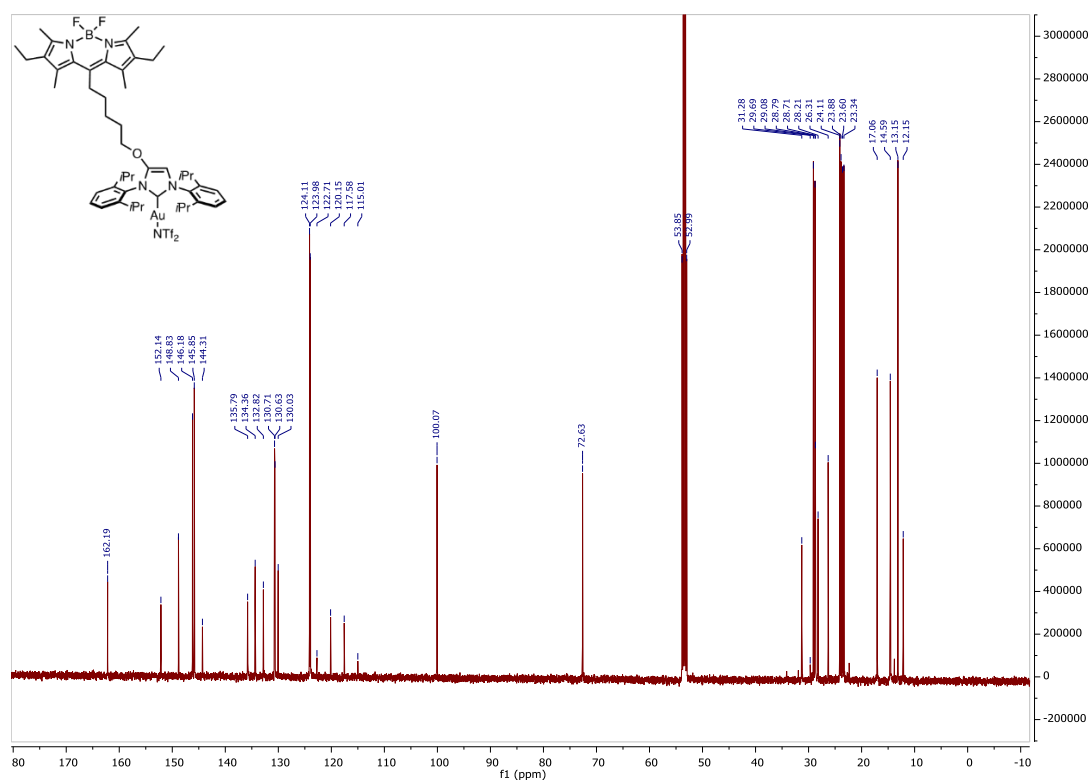

**Figure S 79**  $^{13}\text{C-NMR}$  spectrum of  $[\text{AuCl}(\text{NHC\_green})]$  in  $\text{CD}_2\text{Cl}_2$ .

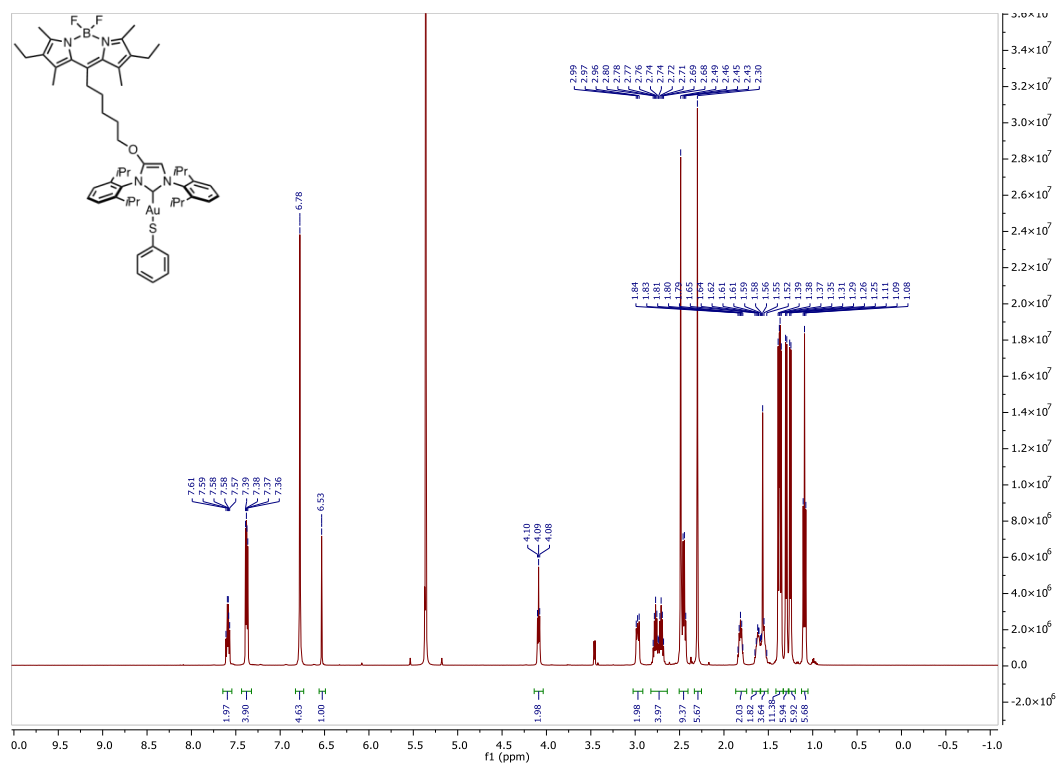

Figure S 80 <sup>1</sup>H-NMR spectrum of 15 in CD<sub>2</sub>Cl<sub>2</sub>.

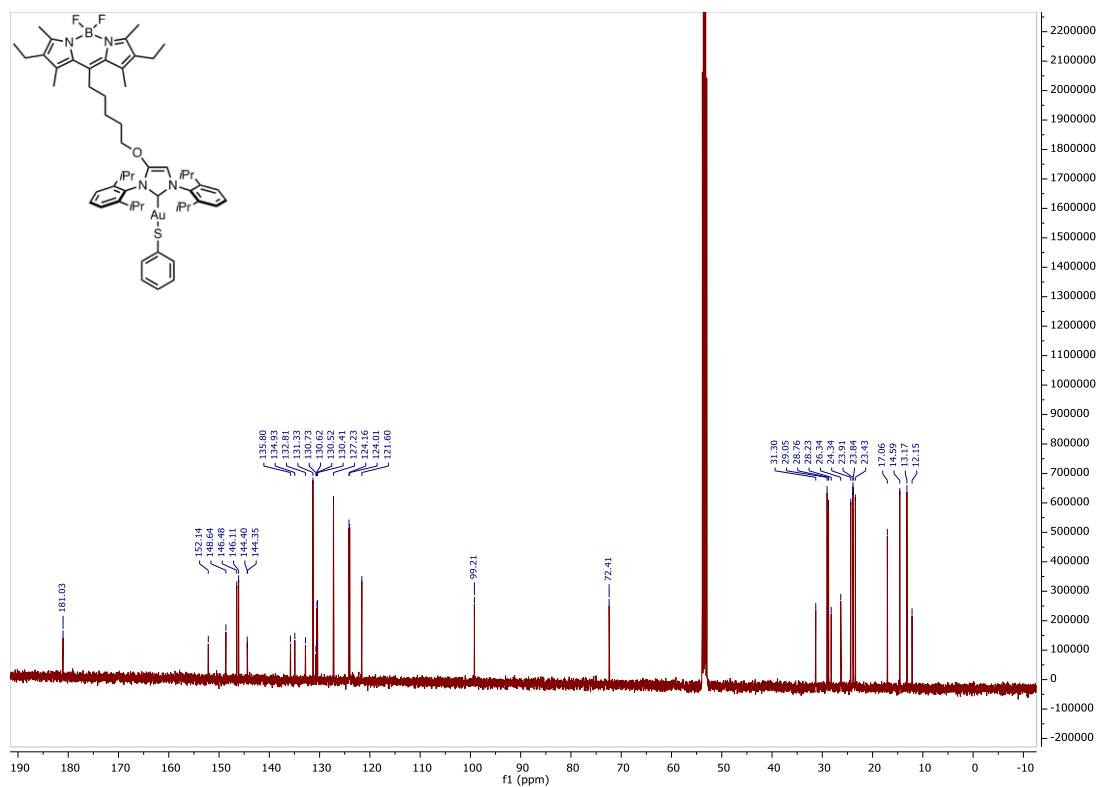

Figure S 81 <sup>13</sup>C-NMR spectrum of 15 in CD<sub>2</sub>Cl<sub>2</sub>.







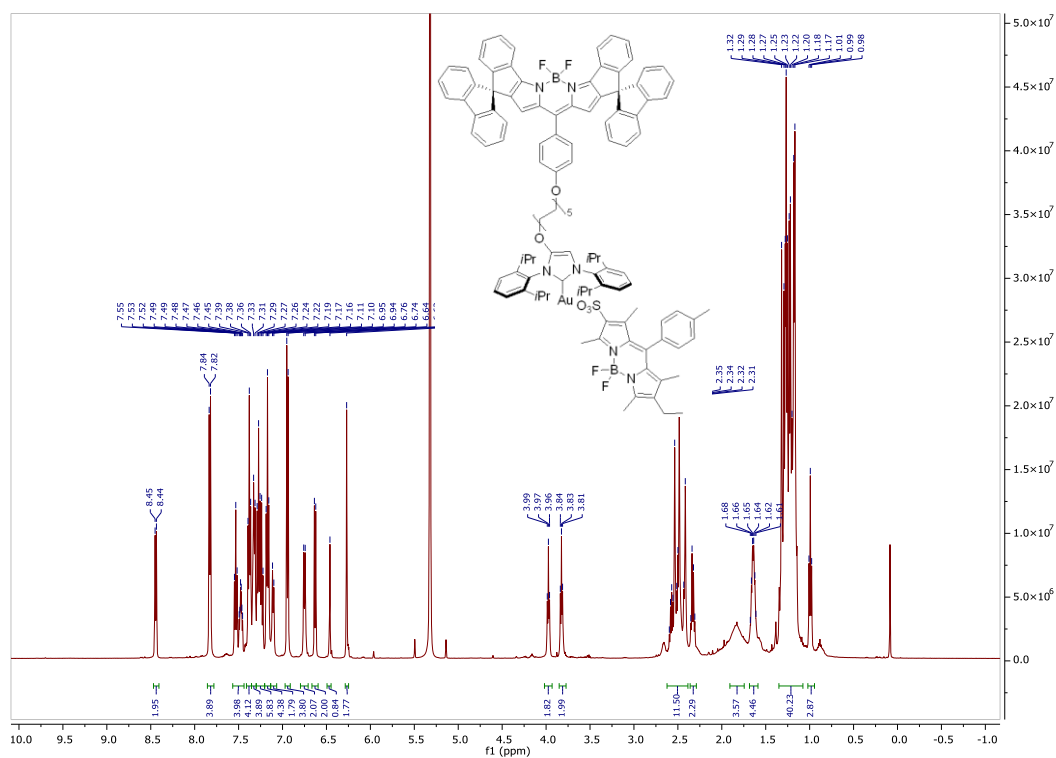

Figure S 86 <sup>1</sup>H-NMR spectrum of **18** in CD<sub>2</sub>Cl<sub>2</sub>.

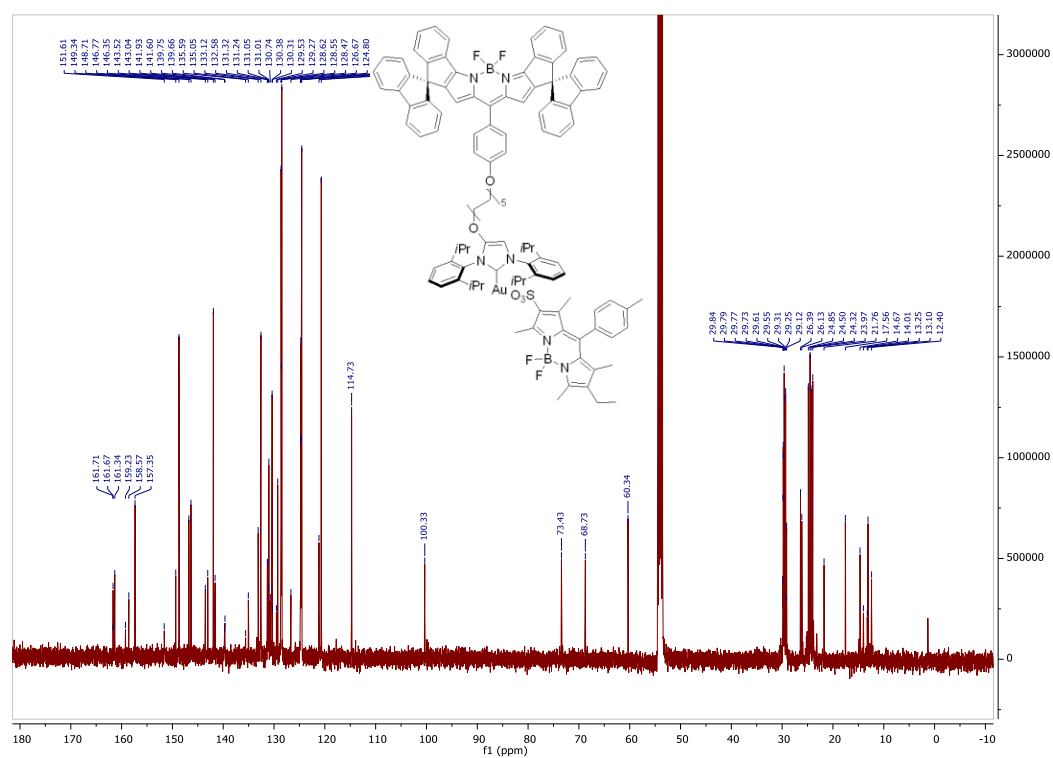

Figure S 87 <sup>13</sup>C-NMR spectrum of **18** in CD<sub>2</sub>Cl<sub>2</sub>.

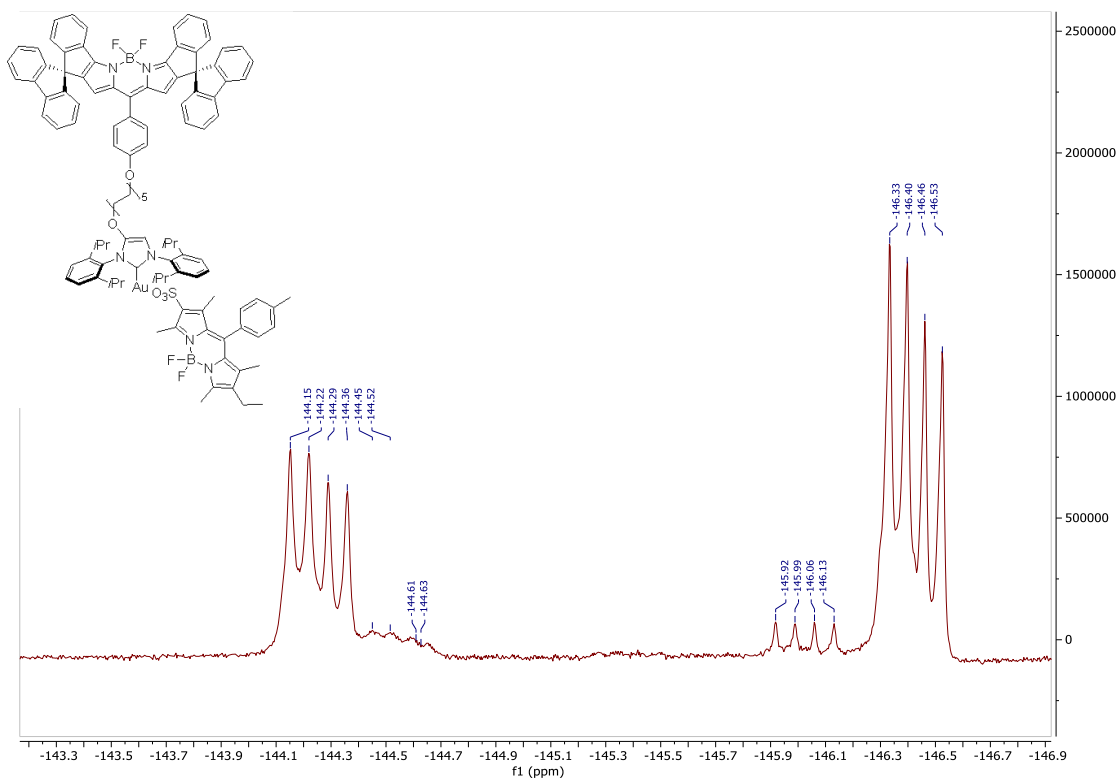

Figure S 88  $^{19}\text{F}$ -NMR spectrum of **18** in  $\text{CD}_2\text{Cl}_2$ .

Blue Bodipy derivatives

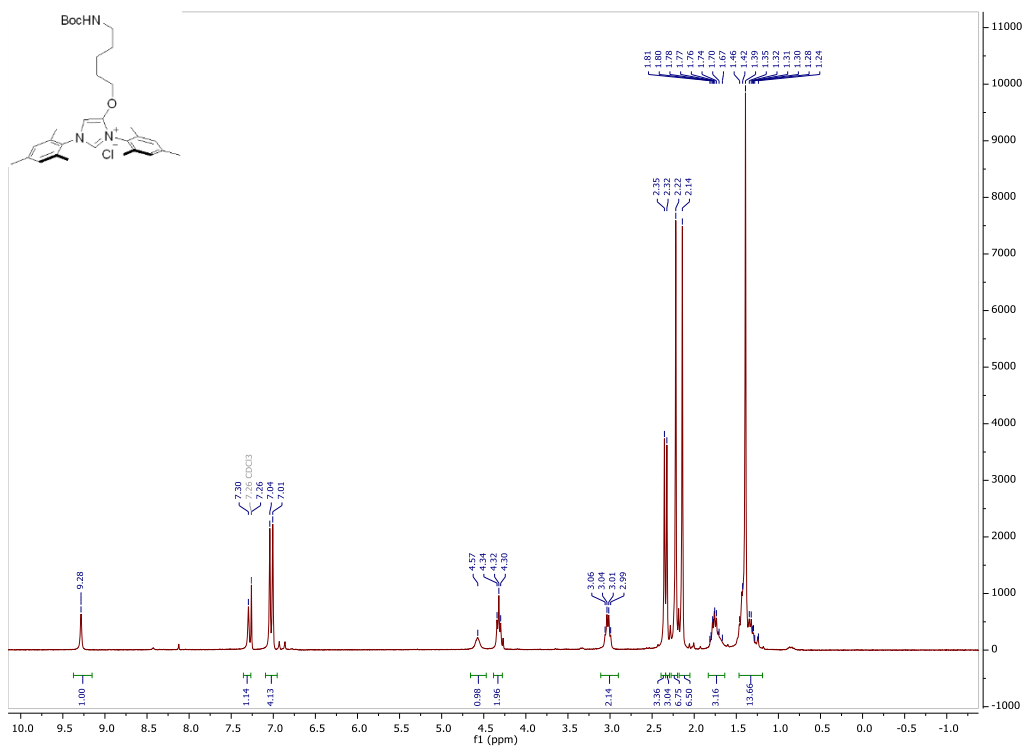

Figure S 89  $^1\text{H}$ -NMR spectrum of **IMes-HCl** in  $\text{CDCl}_3$ .

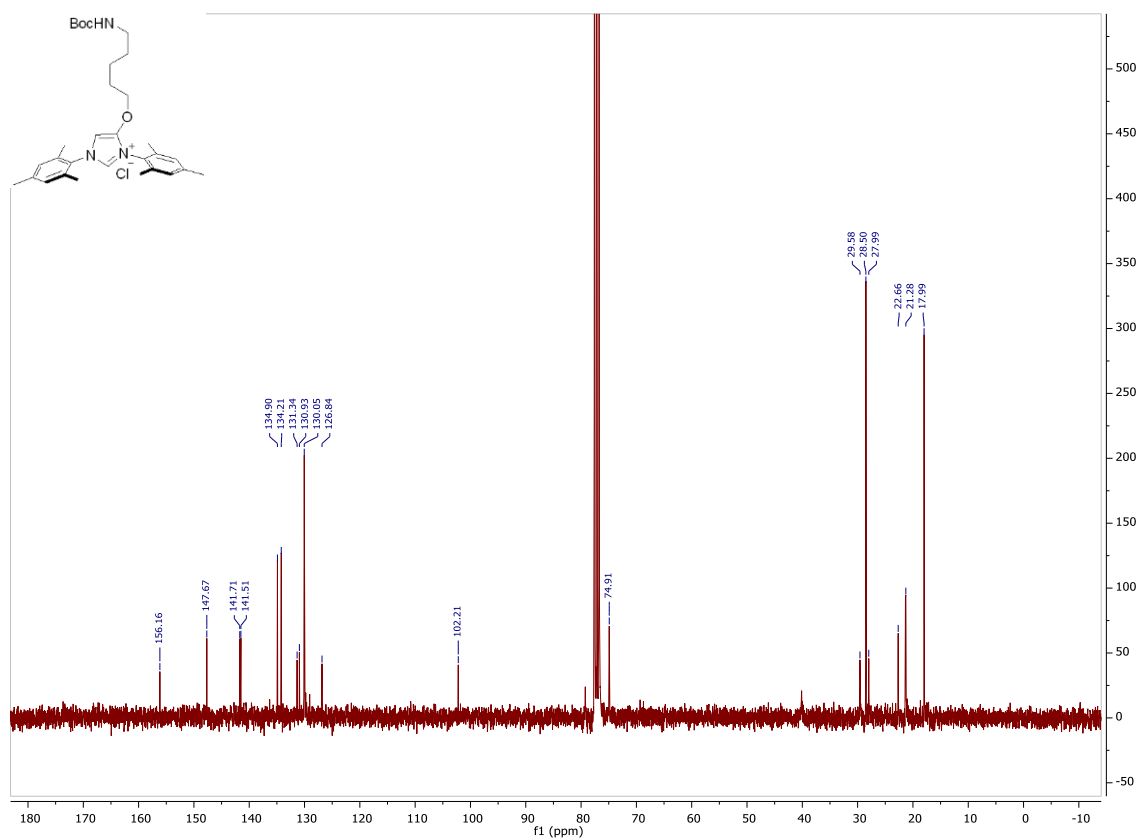

Figure S 90  $^{13}\text{C}$ -NMR spectrum of IMes-HCl in  $\text{CDCl}_3$ .

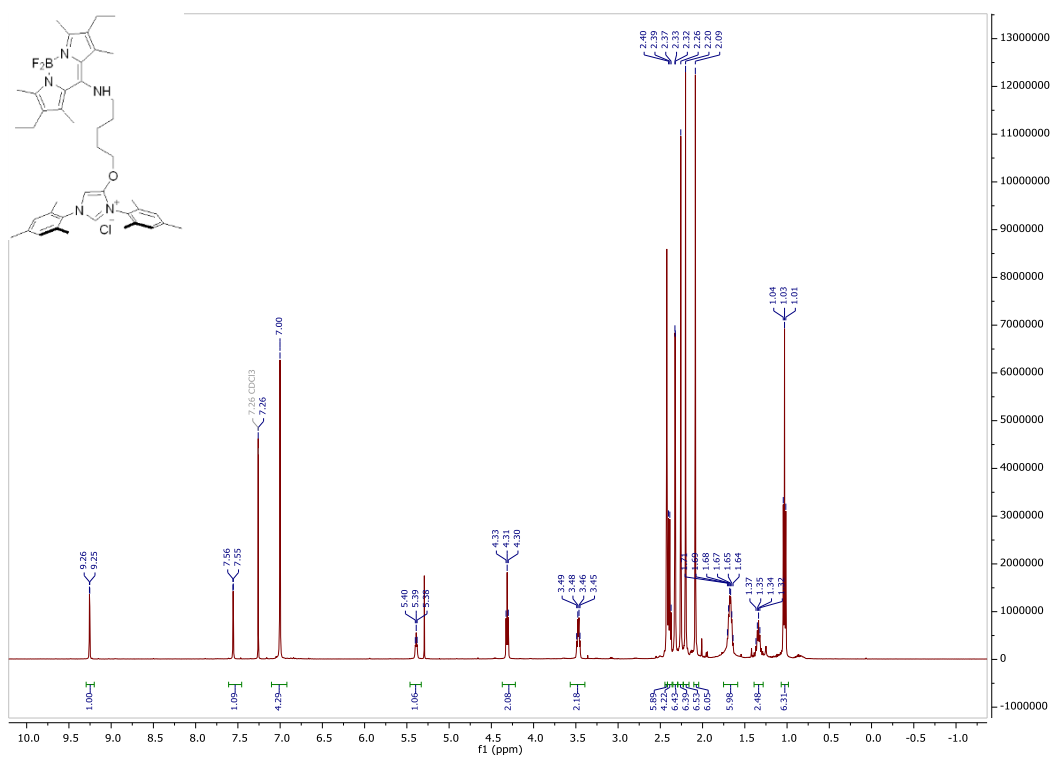

Figure S 91  $^1\text{H}$ -NMR spectrum of 19 in  $\text{CDCl}_3$ .

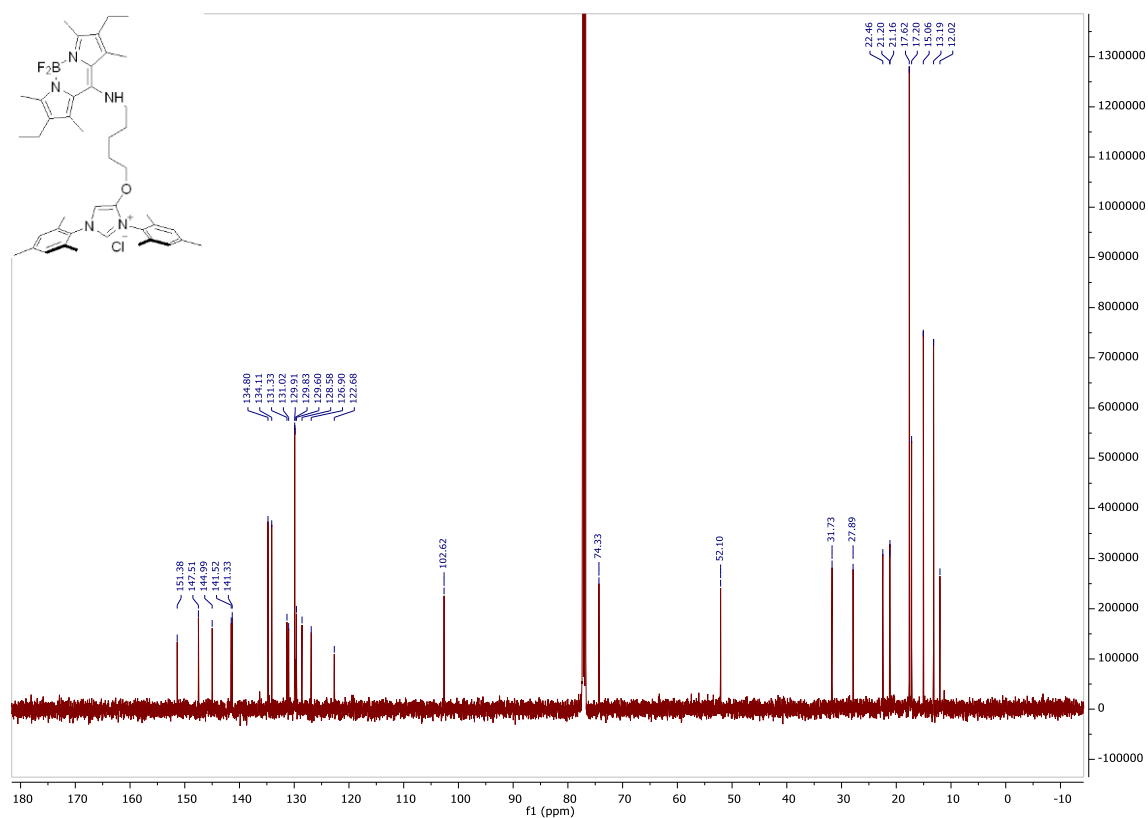

**Figure S 92**  $^{13}\text{C}$ -NMR spectrum of **19** in  $\text{CDCl}_3$ .

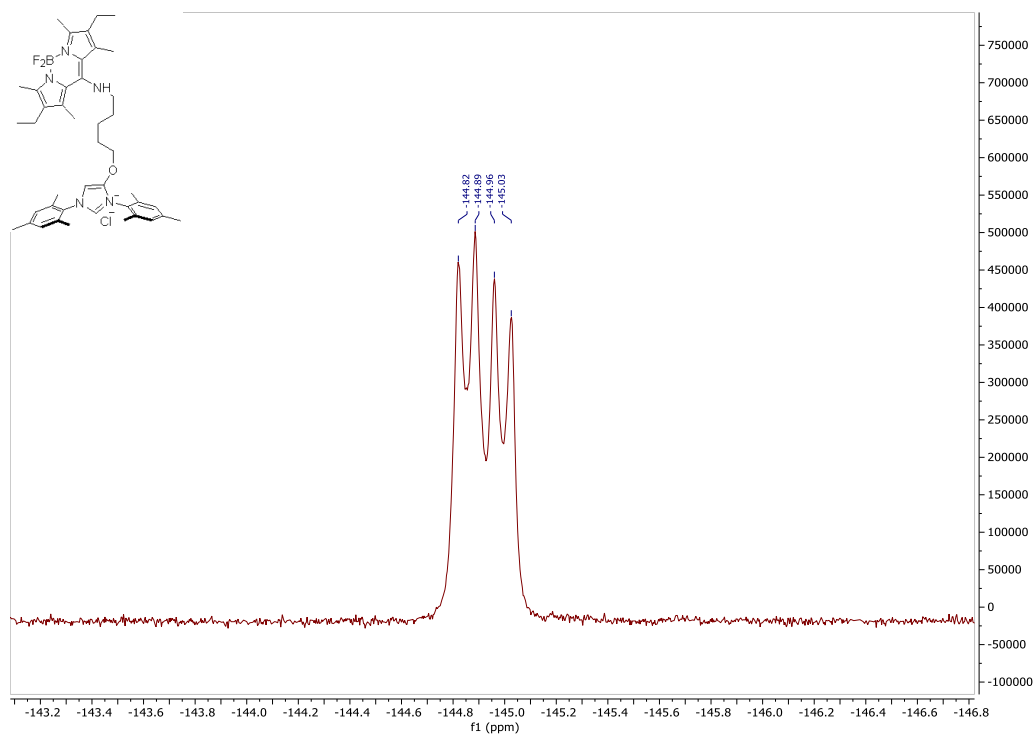

**Figure S 93**  $^{19}\text{F}$ -NMR spectrum of **19** in  $\text{CDCl}_3$ .

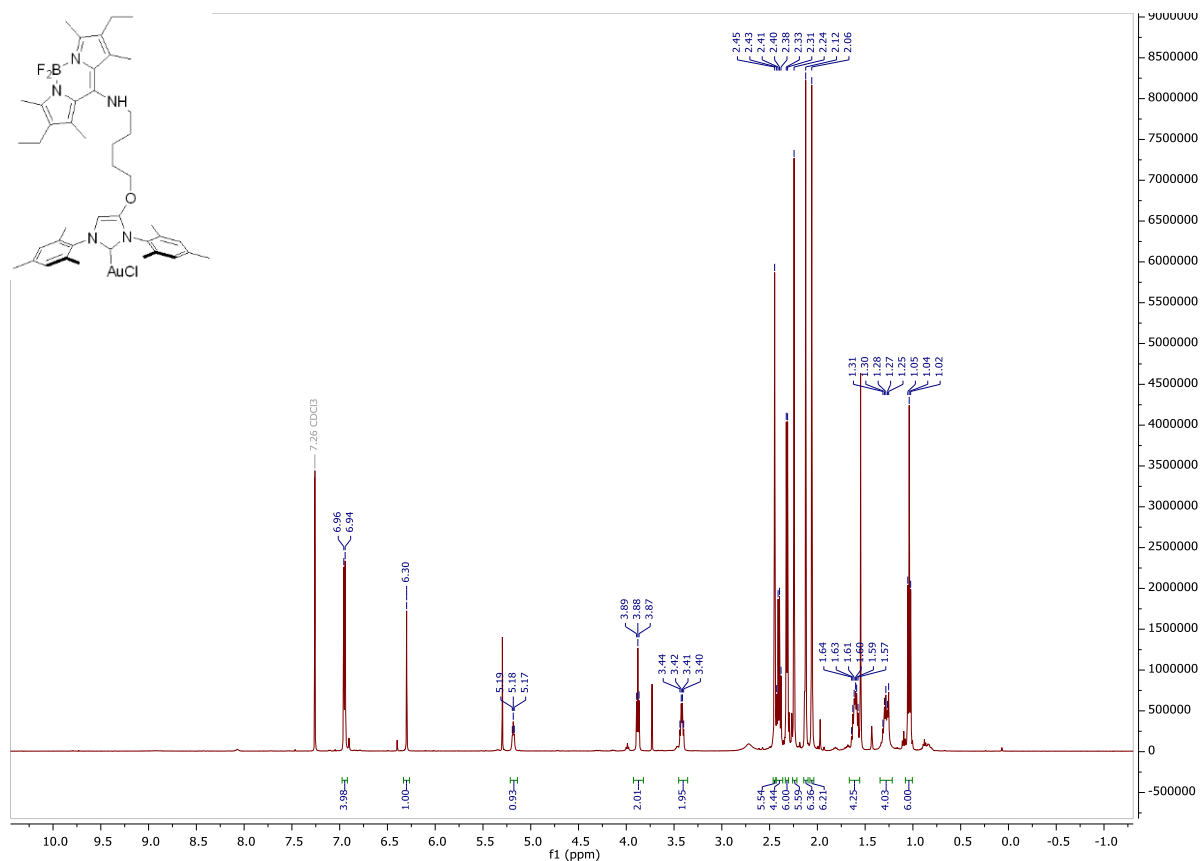

Figure S 94 <sup>1</sup>H-NMR spectrum of **20** in CDCl<sub>3</sub>.

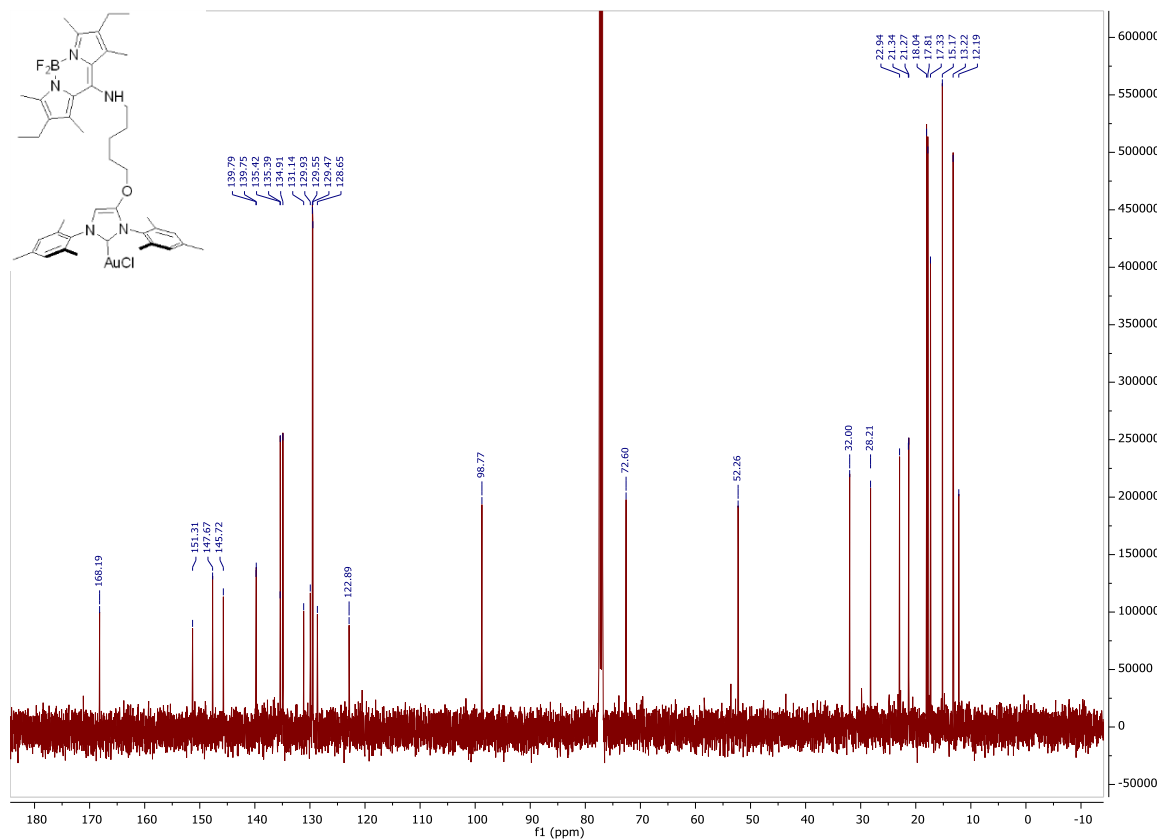

Figure S 95 <sup>13</sup>C-NMR spectrum of **20** in CDCl<sub>3</sub>.

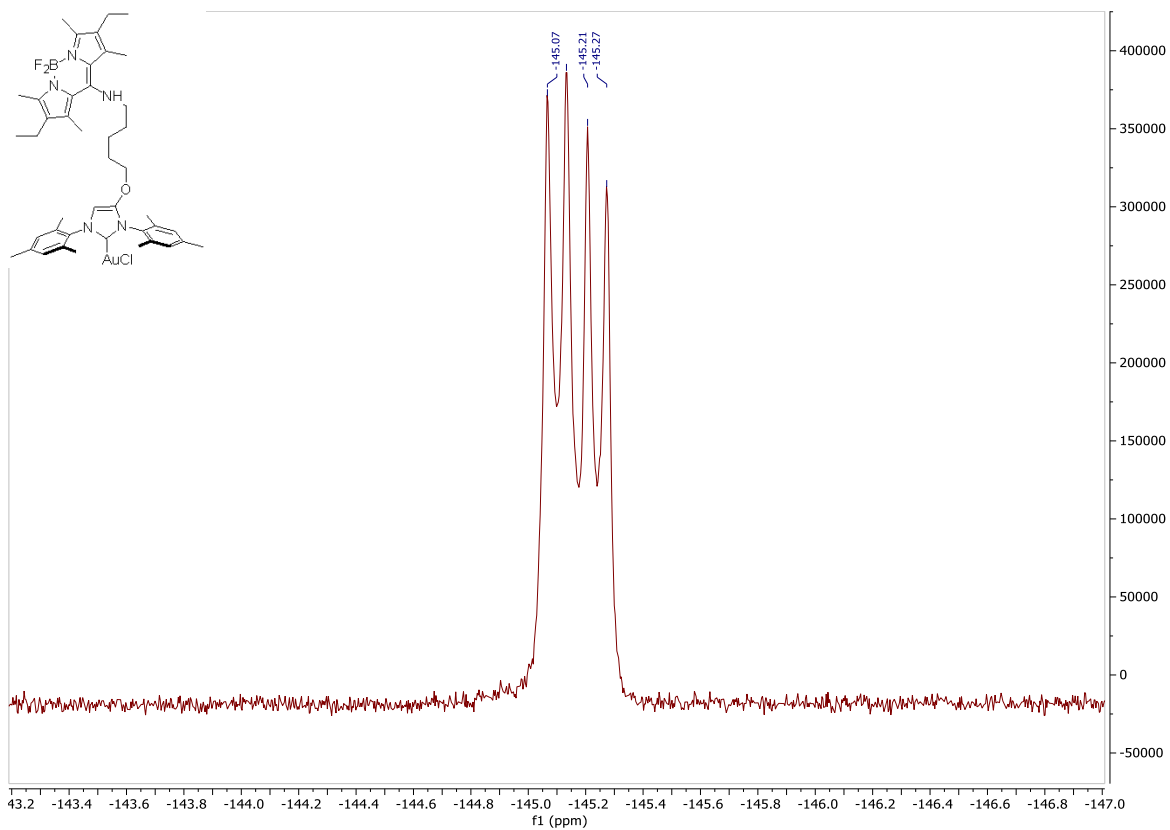

Figure S 96  $^{19}\text{F}$ -NMR spectrum of **20** in  $\text{CDCl}_3$ .

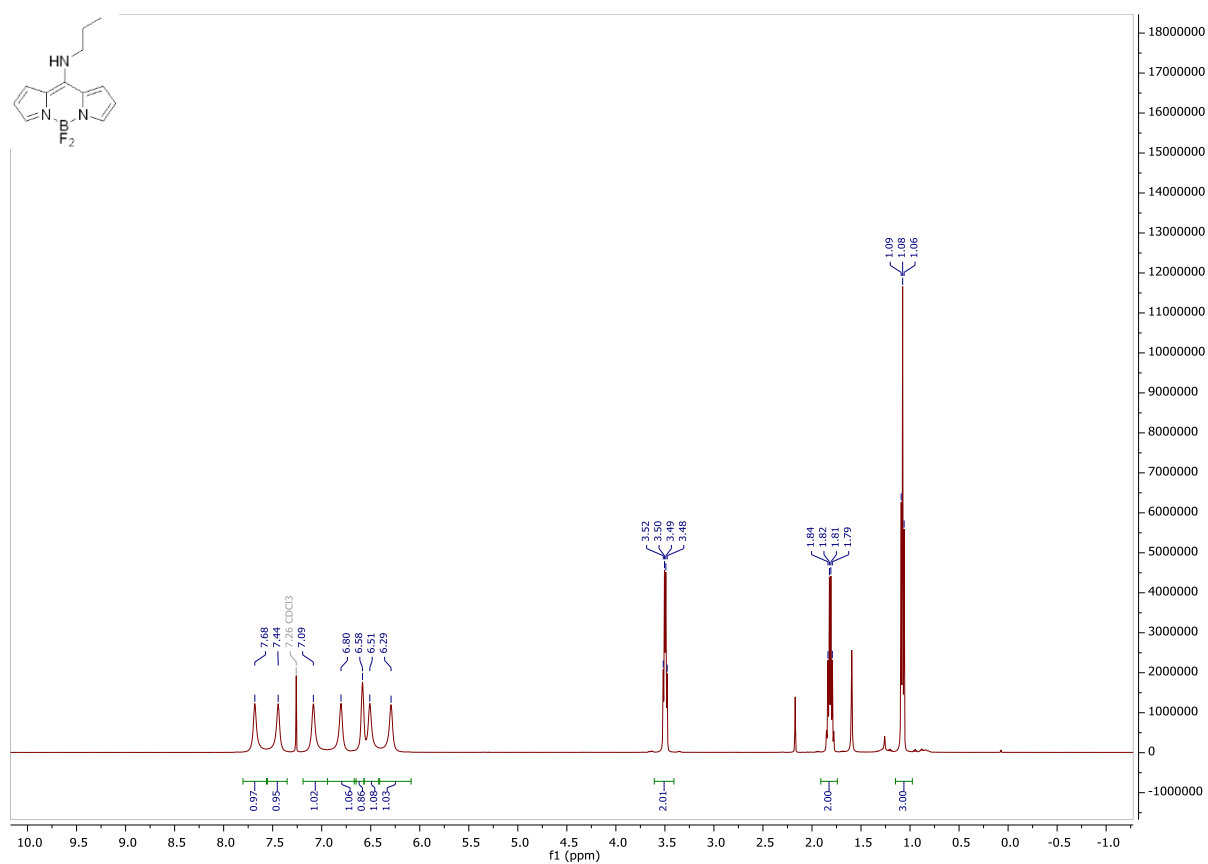

Figure S 97  $^1\text{H}$ -NMR spectrum of **B1** in  $\text{CDCl}_3$ .

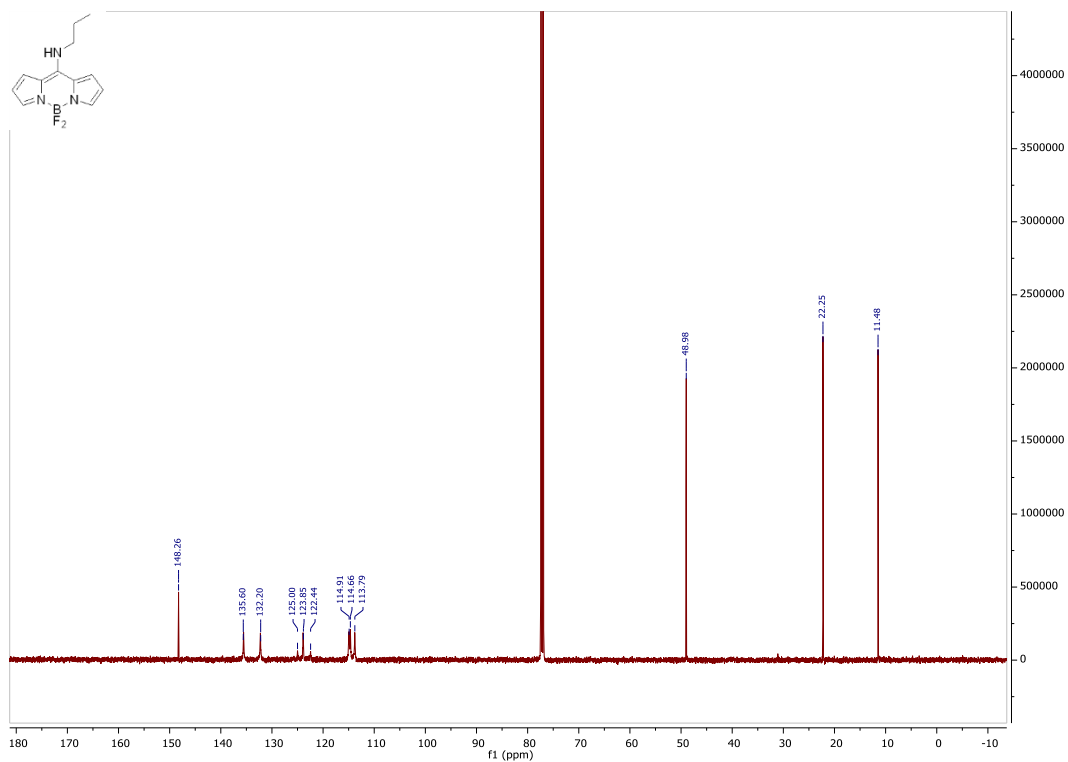

Figure S 98  $^{13}\text{C}$ -NMR spectrum of **B1** in  $\text{CDCl}_3$ .

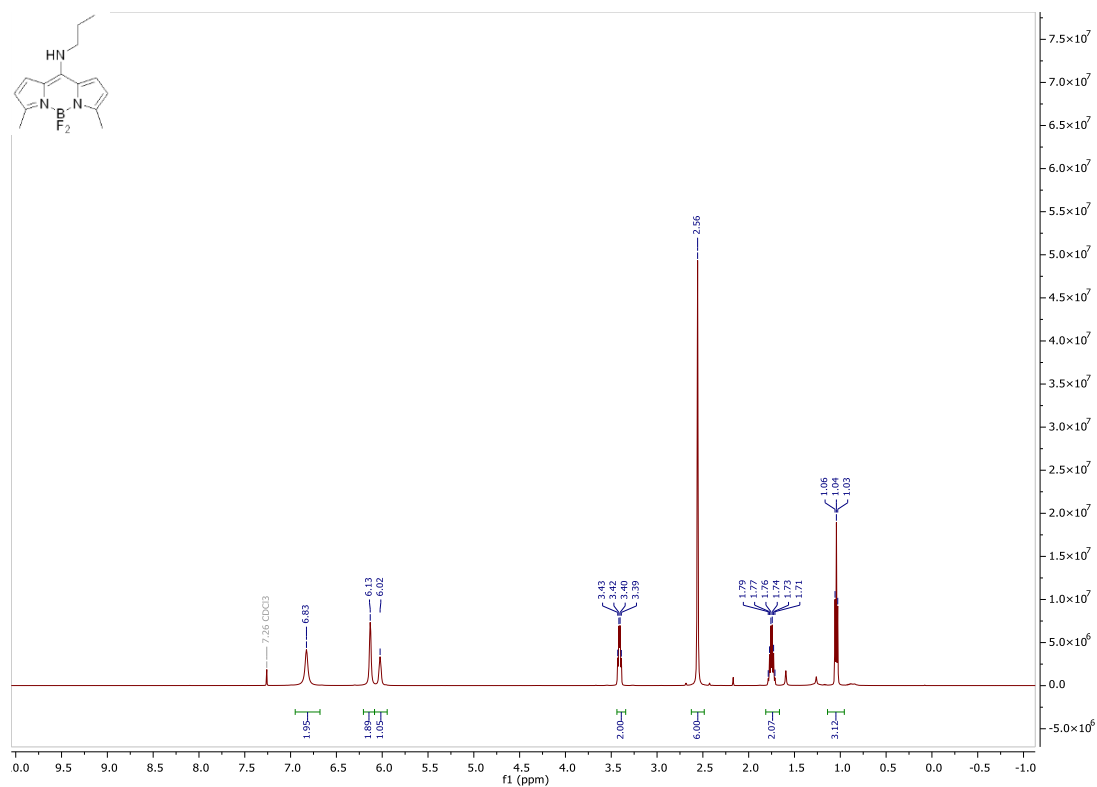

Figure S 99  $^1\text{H}$ -NMR spectrum of **B2** in  $\text{CDCl}_3$ .



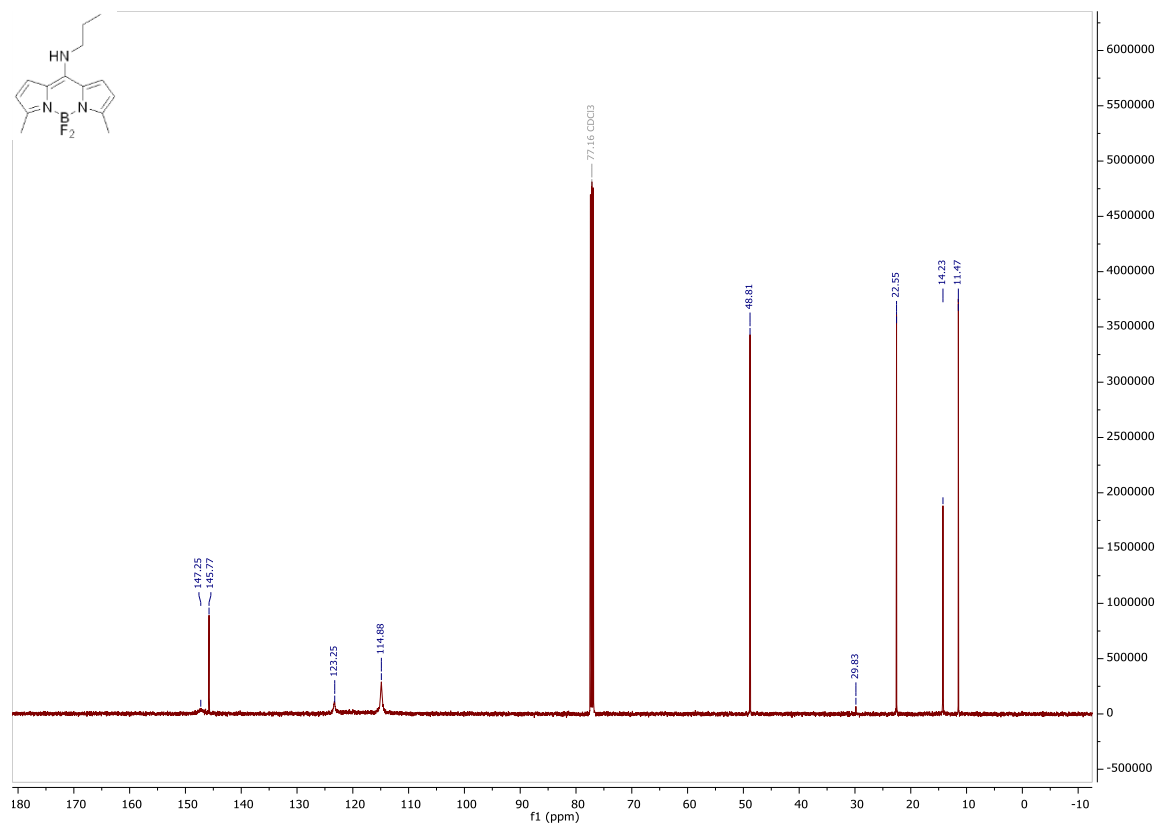

Figure S 100 <sup>13</sup>C-NMR spectrum of **B2** in CDCl<sub>3</sub>.

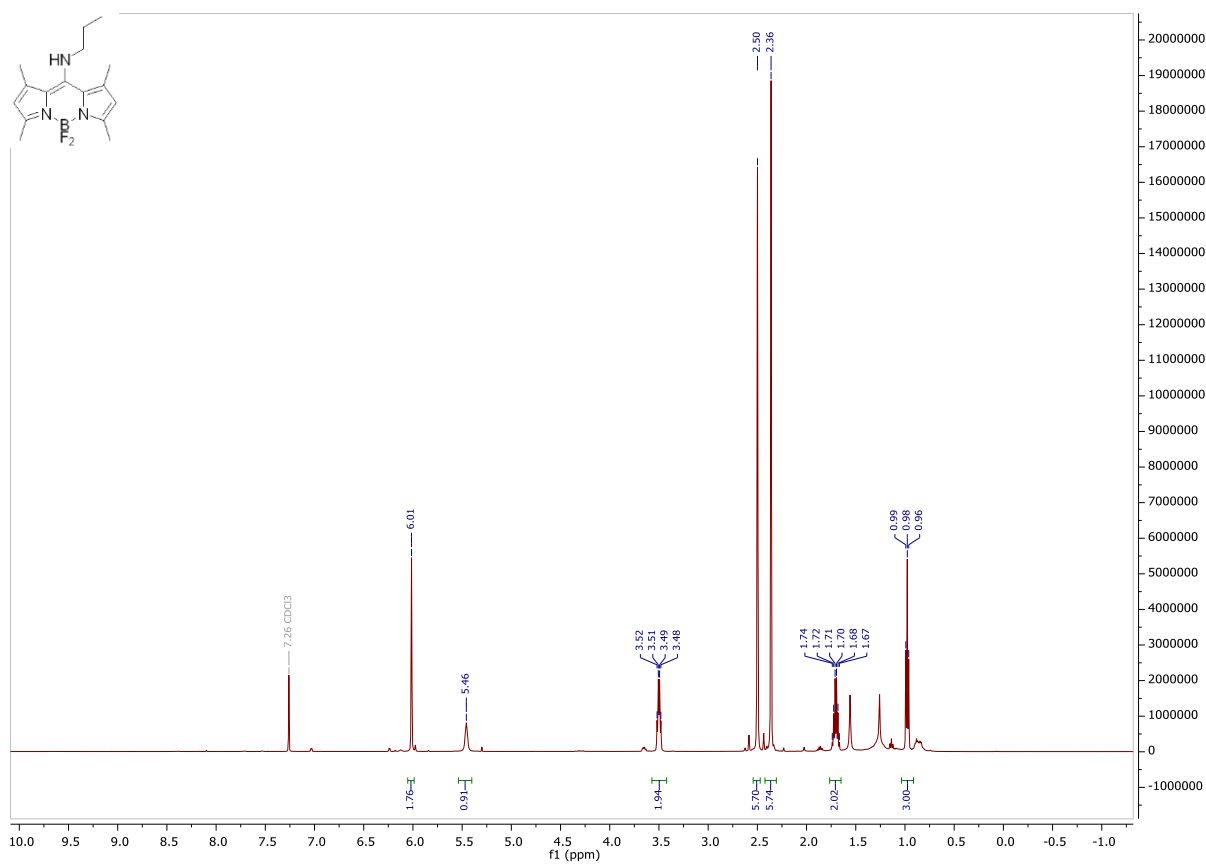

Figure S 101 <sup>1</sup>H-NMR spectrum of **B3** in CDCl<sub>3</sub>.

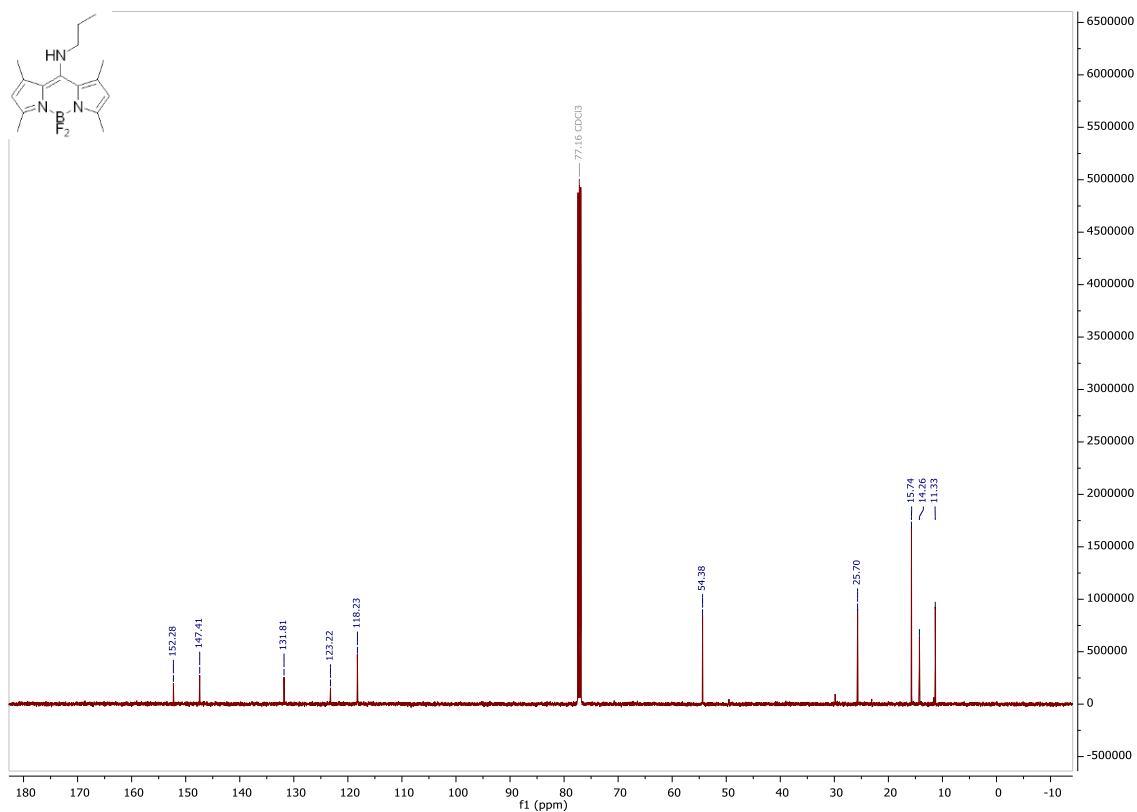

Figure S 102 <sup>13</sup>C-NMR spectrum of **B3** in CDCl<sub>3</sub>.

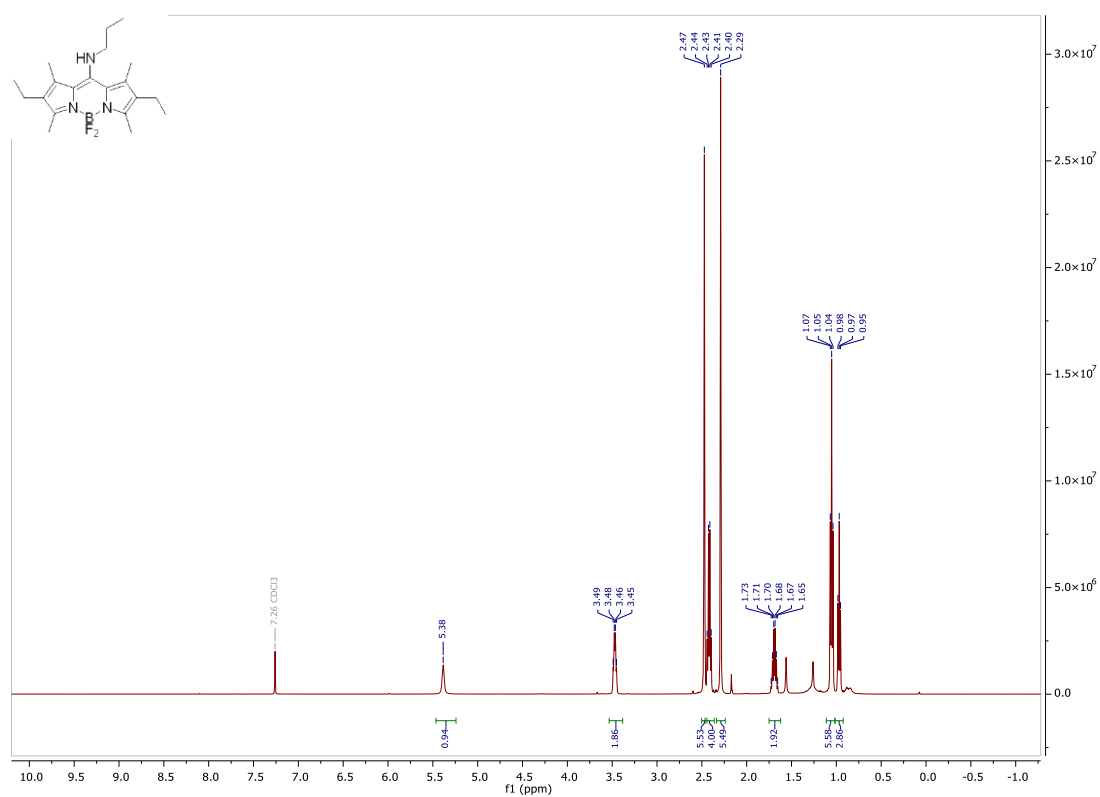

Figure S 103 <sup>1</sup>H-NMR spectrum of **B4** in CDCl<sub>3</sub>.

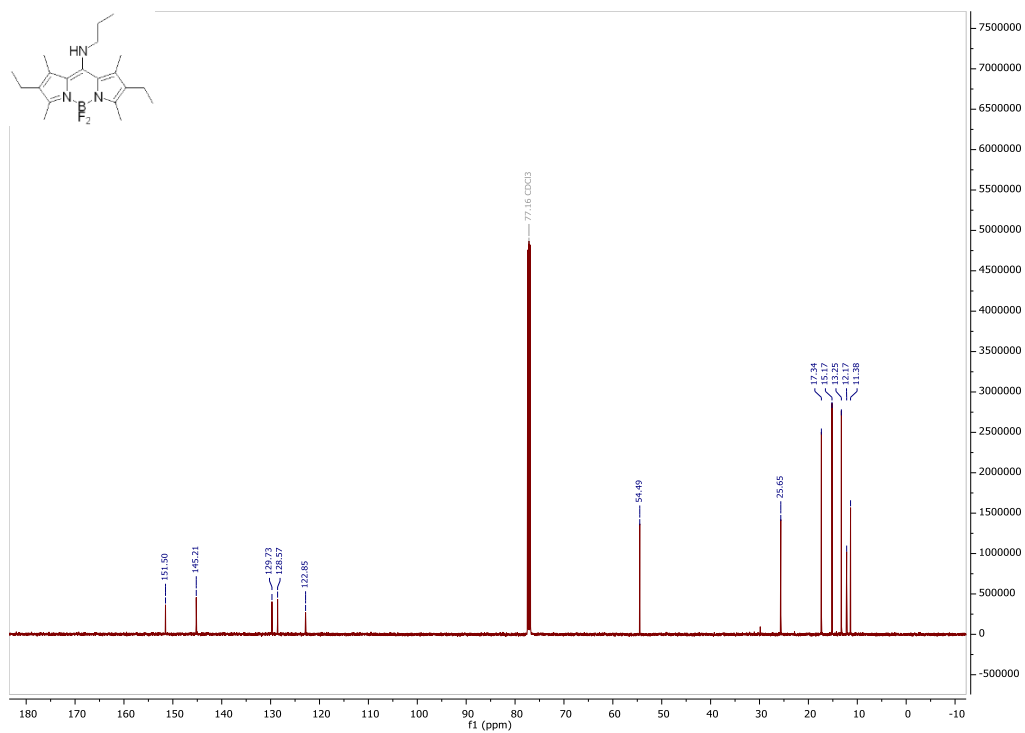

Figure S 104 <sup>13</sup>C-NMR spectrum of B4 in CDCl<sub>3</sub>.

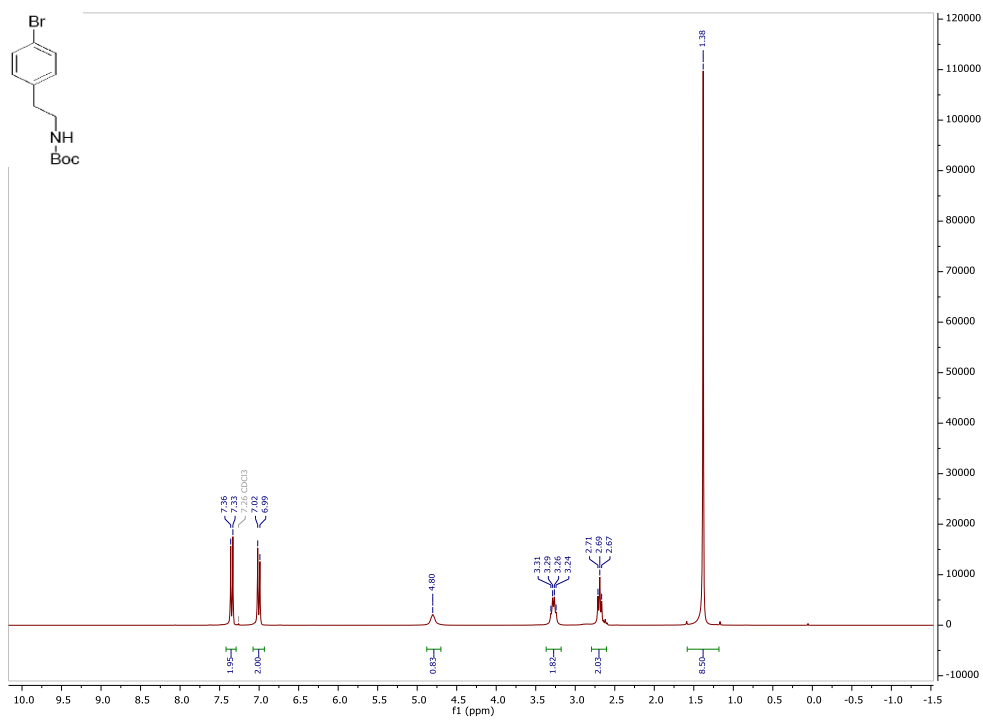

Figure S 105 <sup>1</sup>H-NMR spectrum of *tert*-butyl (4-bromophenethyl)carbamate in CDCl<sub>3</sub>.

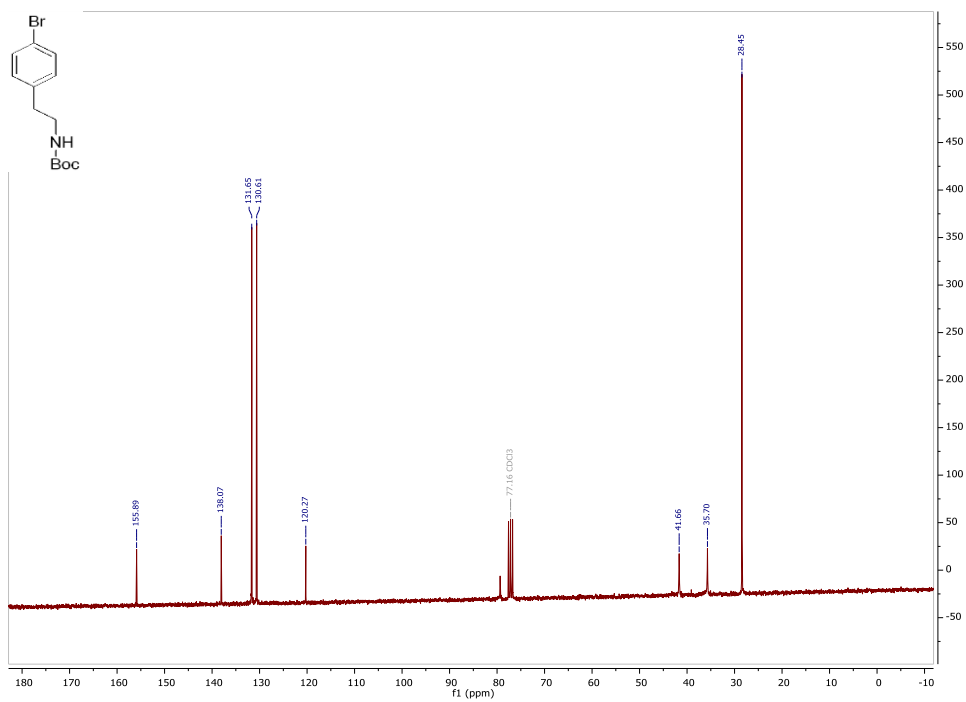

**Figure S 106** <sup>13</sup>C-NMR spectrum of *tert*-butyl (4-bromophenethyl)carbamate in CDCl<sub>3</sub>.

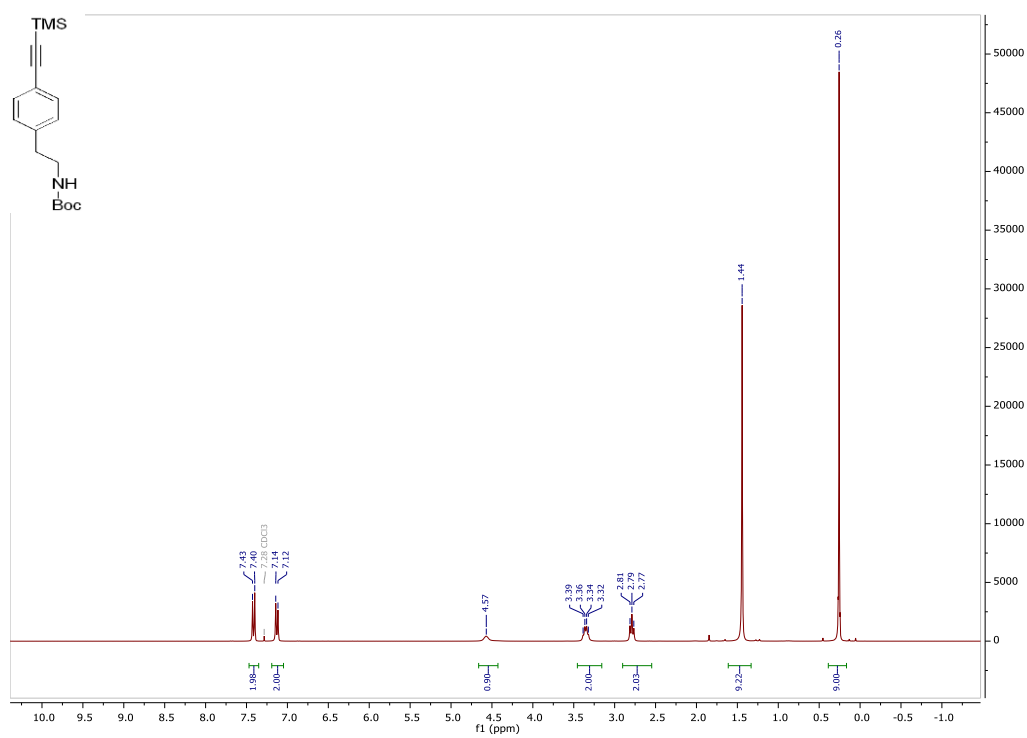

**Figure S 107** <sup>1</sup>H-NMR spectrum of *tert*-butyl (4-((trimethylsilyl)ethynyl)phenethyl)carbamate in CDCl<sub>3</sub>.

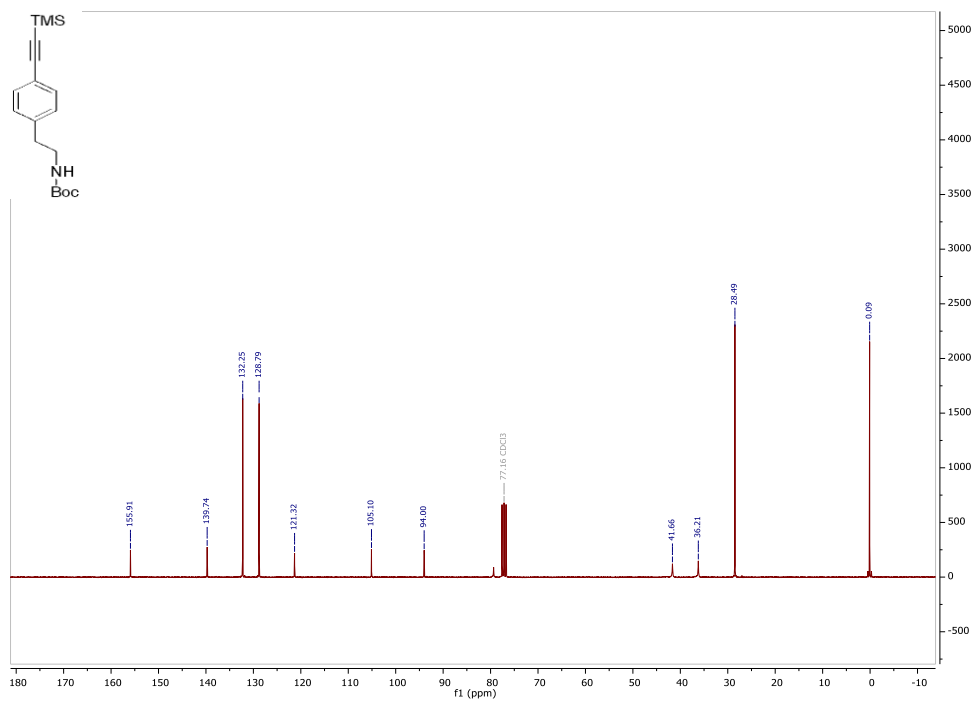

**Figure S 108** <sup>13</sup>C-NMR spectrum of *tert*-butyl (4-((trimethylsilyl)ethynyl)phenethyl) carbamate in CDCl<sub>3</sub>.

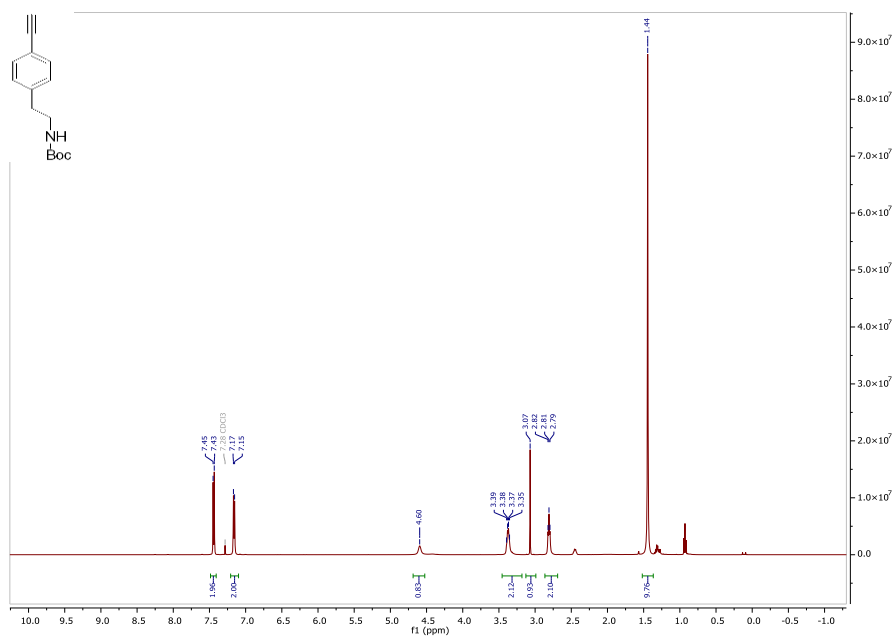

**Figure S 109** <sup>1</sup>H-NMR spectrum of *tert*-butyl (4-ethynylphenethyl) carbamate in CDCl<sub>3</sub>.

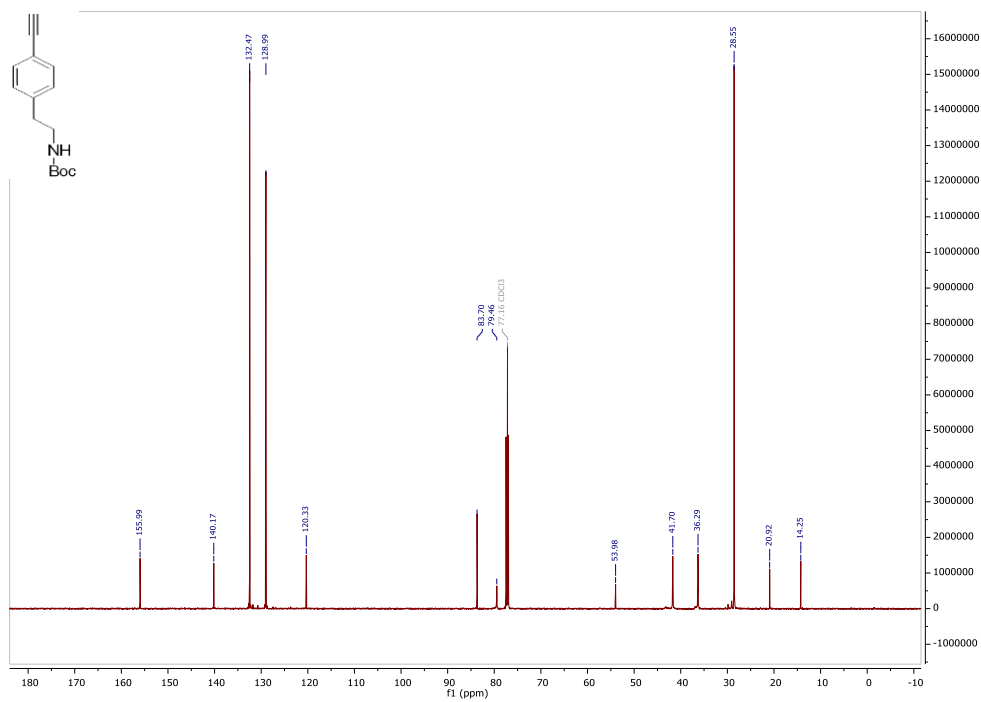

**Figure S 110**  $^{13}\text{C}$ -NMR spectrum of *tert*-butyl (4-ethynylphenethyl)carbamate in  $\text{CDCl}_3$ .

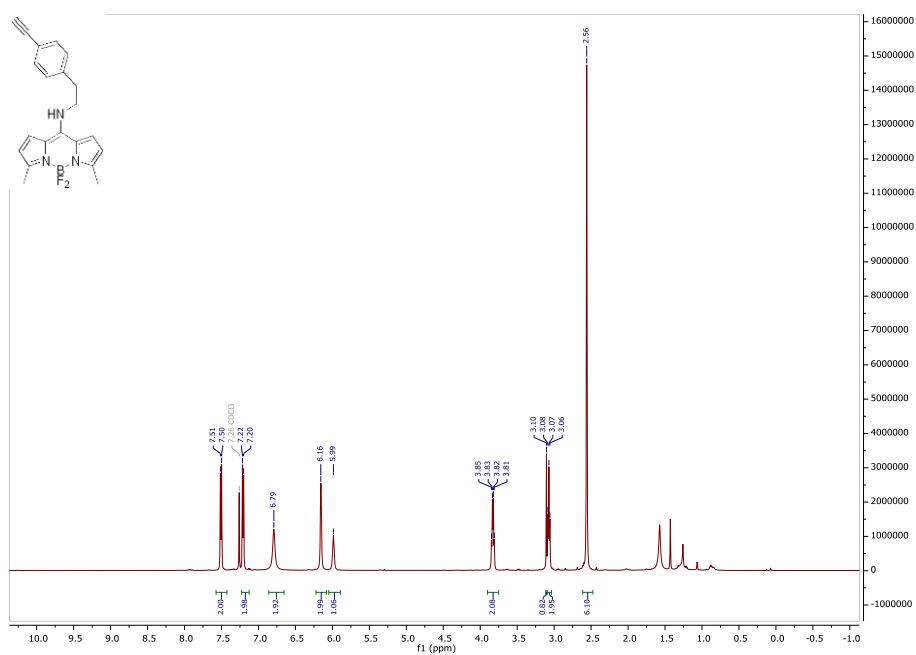

**Figure S 111**  $^1\text{H}$ -NMR spectrum of **21** in  $\text{CDCl}_3$ .

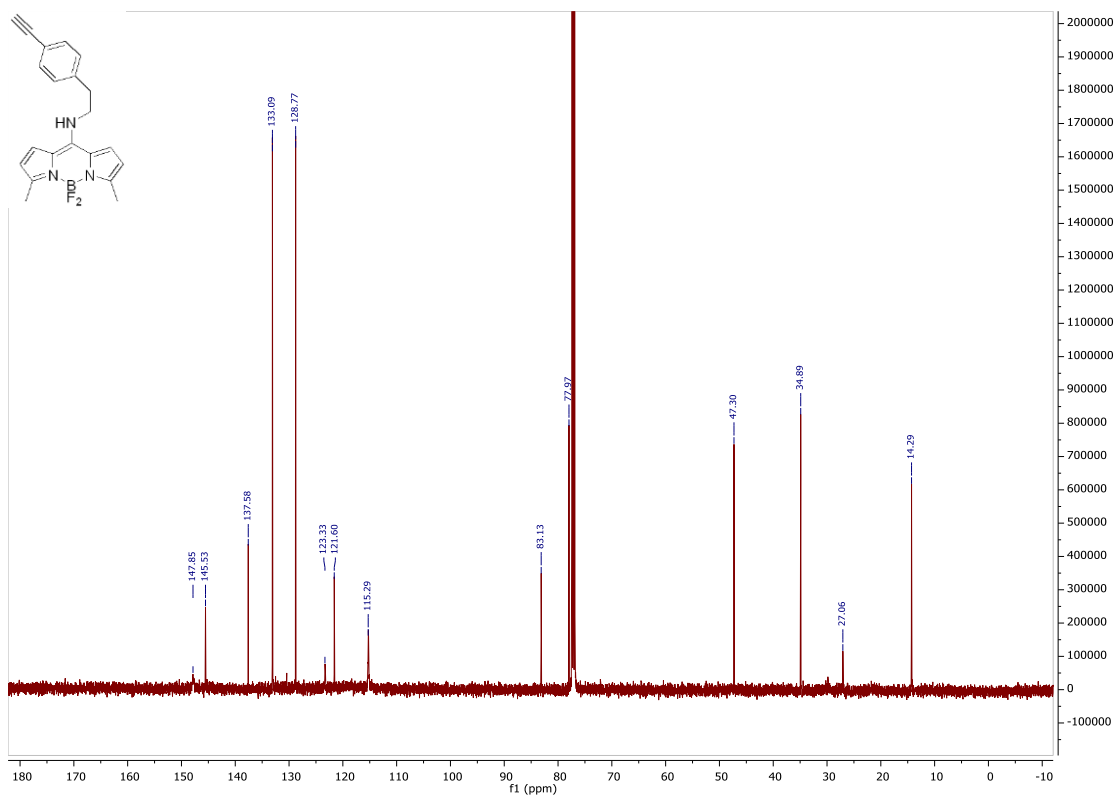

Figure S 112  $^{13}\text{C-NMR}$  spectrum of **21** in  $\text{CDCl}_3$ .

### Blue-green-red triad

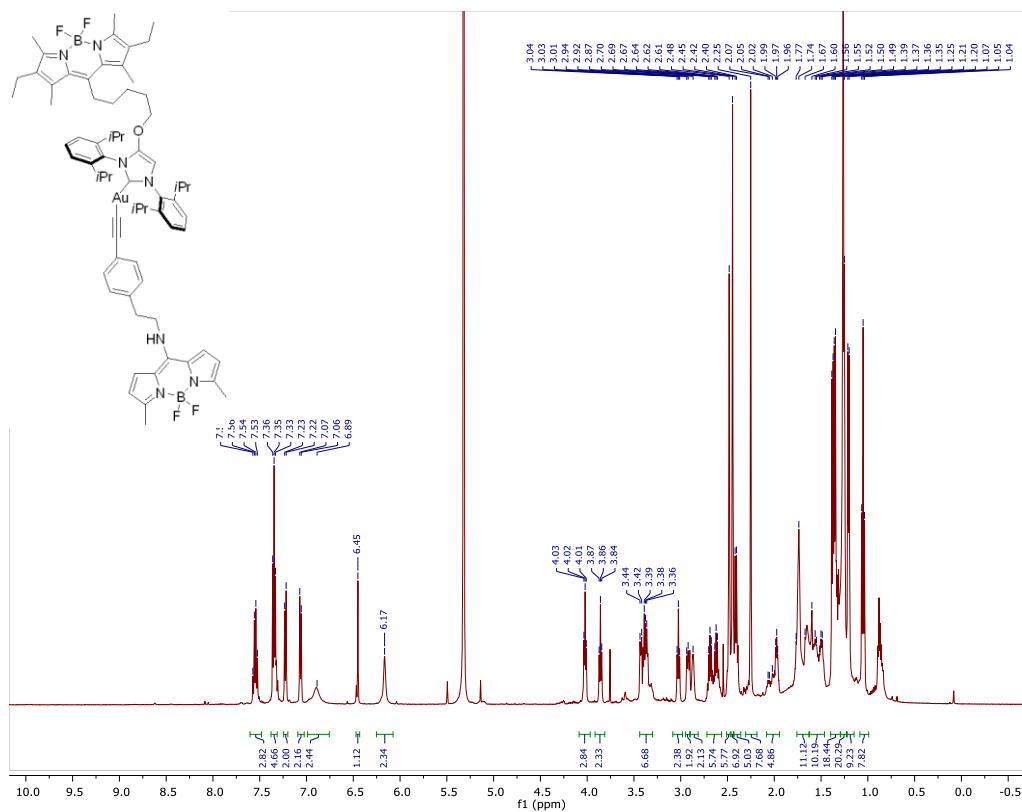

Figure S 113  $^1\text{H-NMR}$  spectrum of **22-dbu** in  $\text{CD}_2\text{Cl}_2$ .

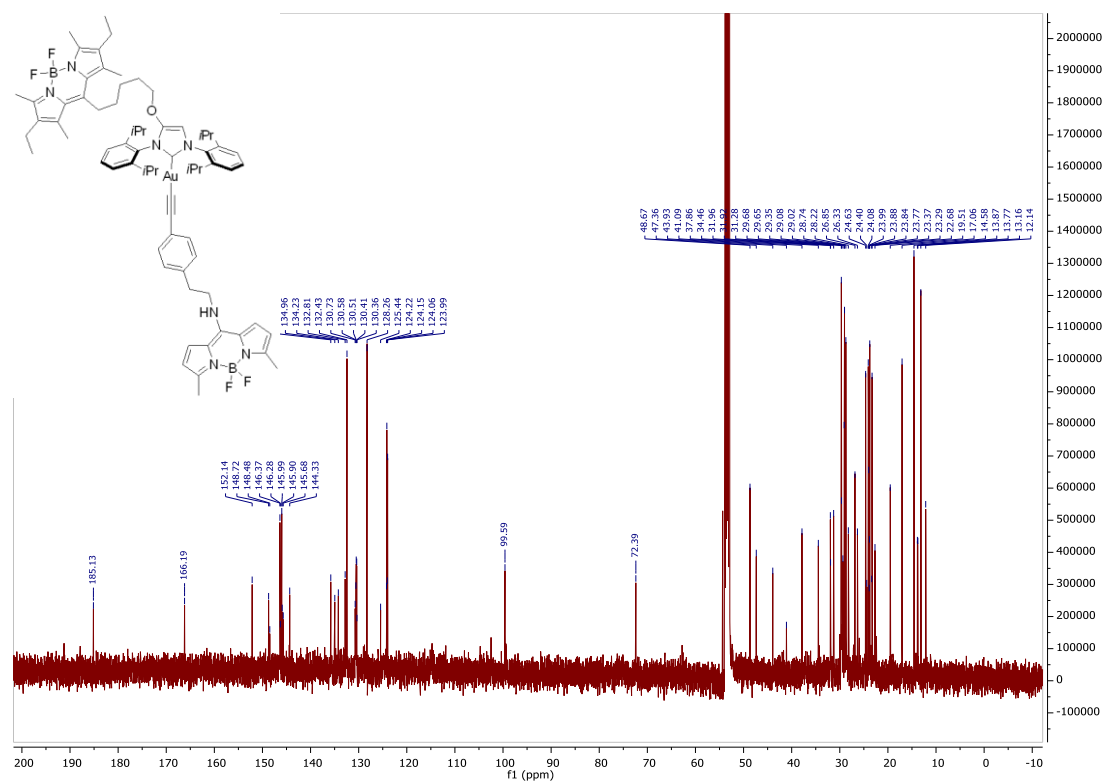

Figure S 114  $^{13}\text{C}$ -NMR spectrum of **22-dbu** in  $\text{CD}_2\text{Cl}_2$ .

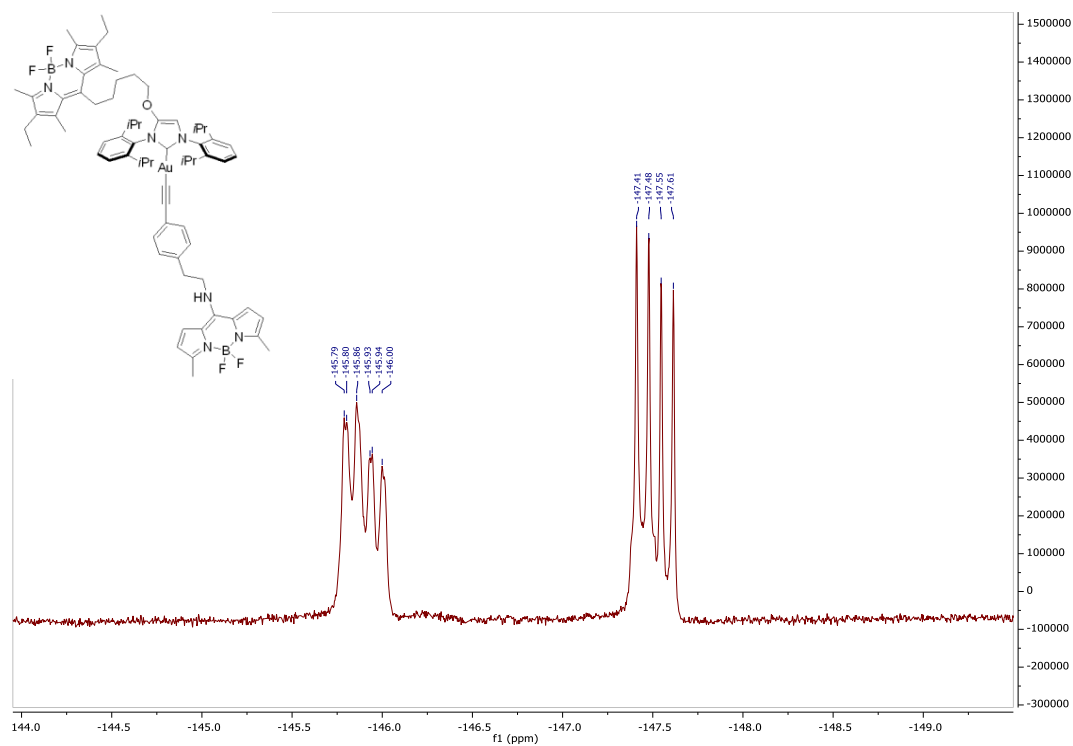

Figure S 115  $^{19}\text{F}$ -NMR spectrum of **22-dbu** in  $\text{CD}_2\text{Cl}_2$ .



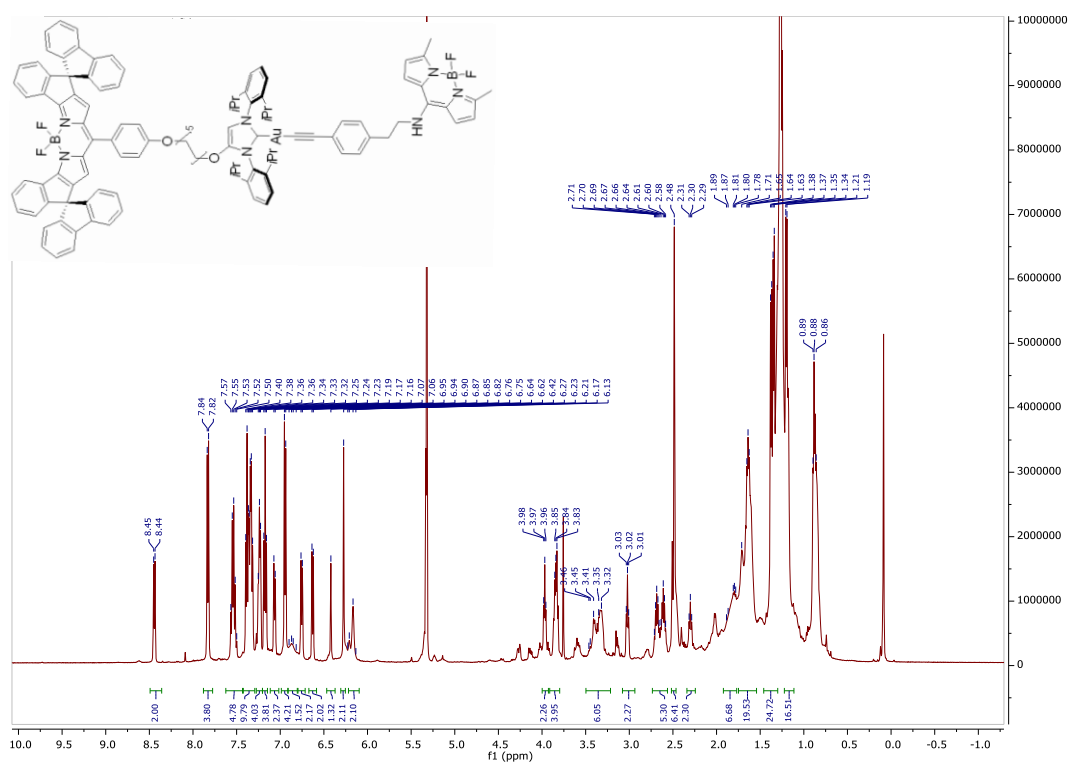

**Figure S 116**  $^1\text{H-NMR}$  spectrum of **24-dbu** in  $\text{CD}_2\text{Cl}_2$ .

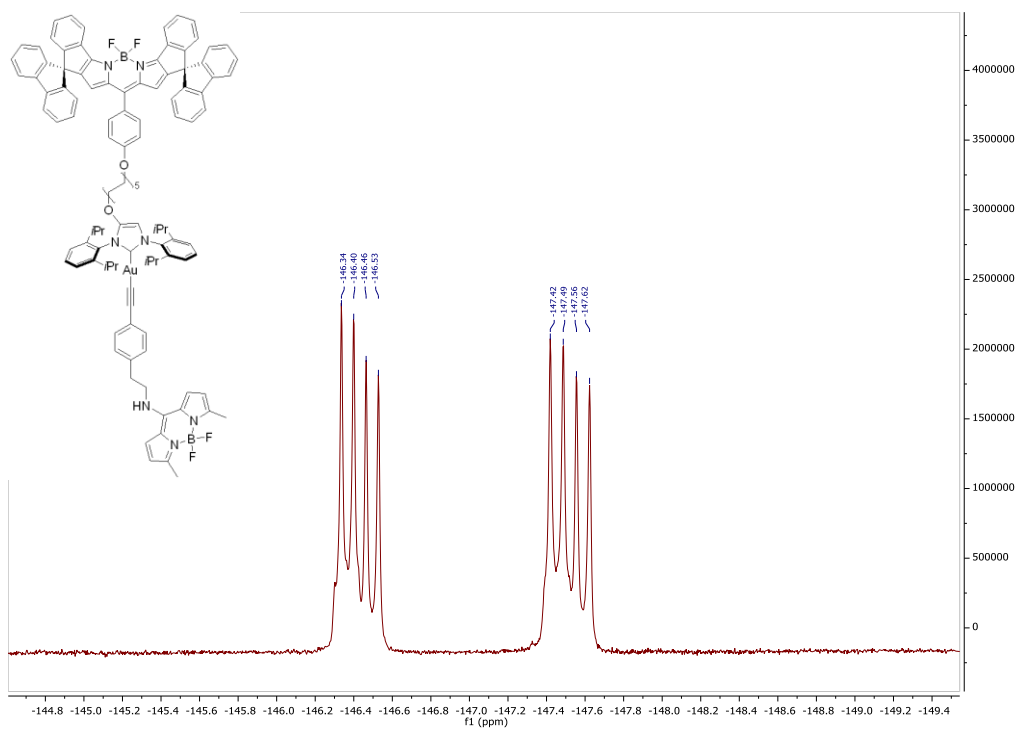

**Figure S 117**  $^{19}\text{F-NMR}$  spectrum of **24-dbu** in  $\text{CD}_2\text{Cl}_2$ .

# IPrAuNTf<sub>2</sub> + DBU interaction

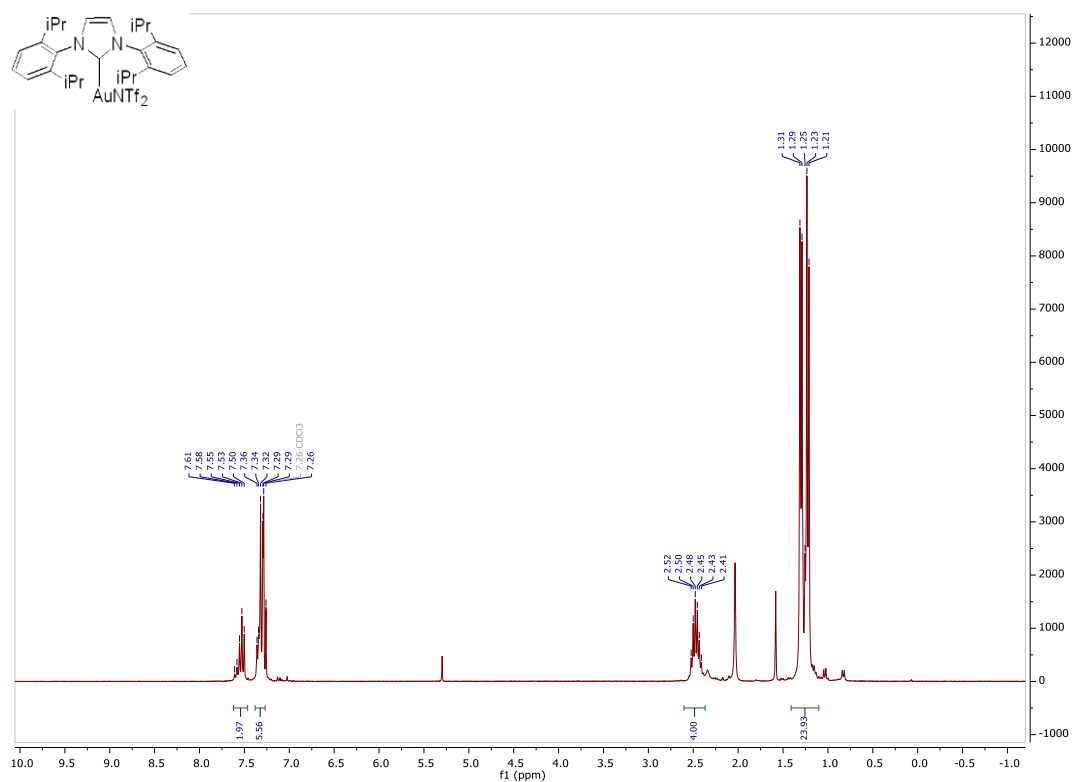

Figure S 118 <sup>1</sup>H-NMR spectrum of IPrAuNTf<sub>2</sub> in CDCl<sub>3</sub>.

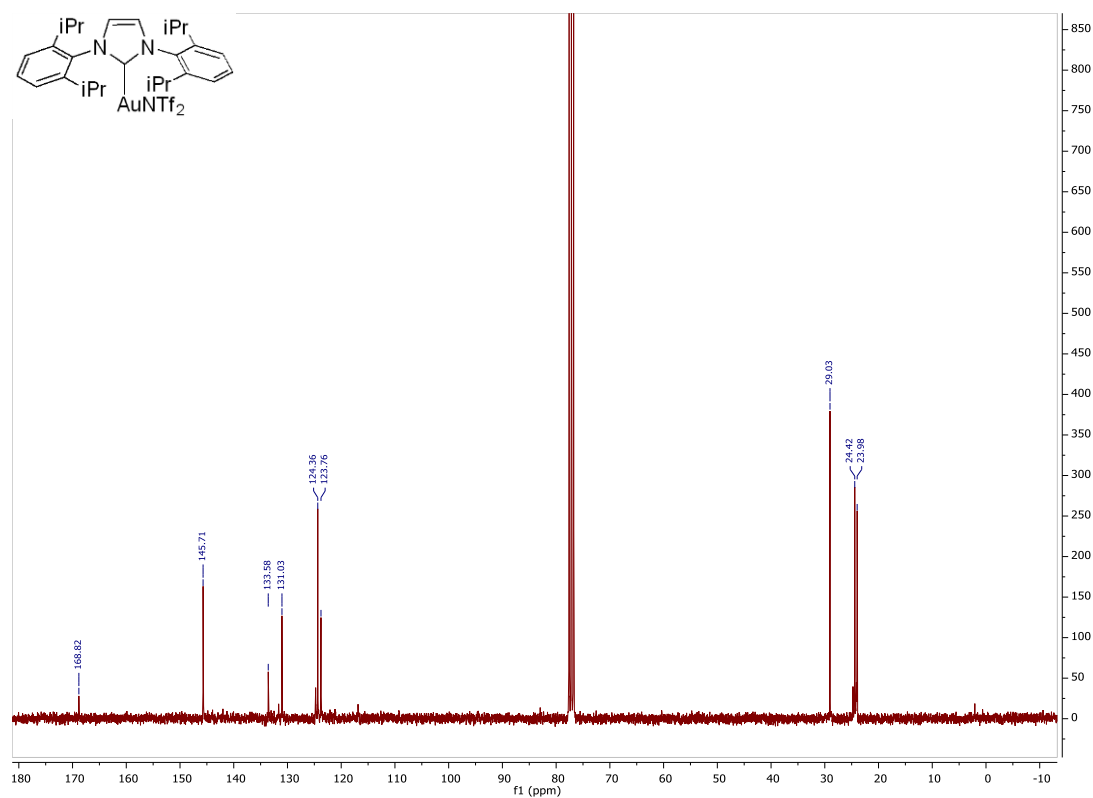

Figure S 119 <sup>13</sup>C-NMR spectrum of IPrAuNTf<sub>2</sub> in CDCl<sub>3</sub>.

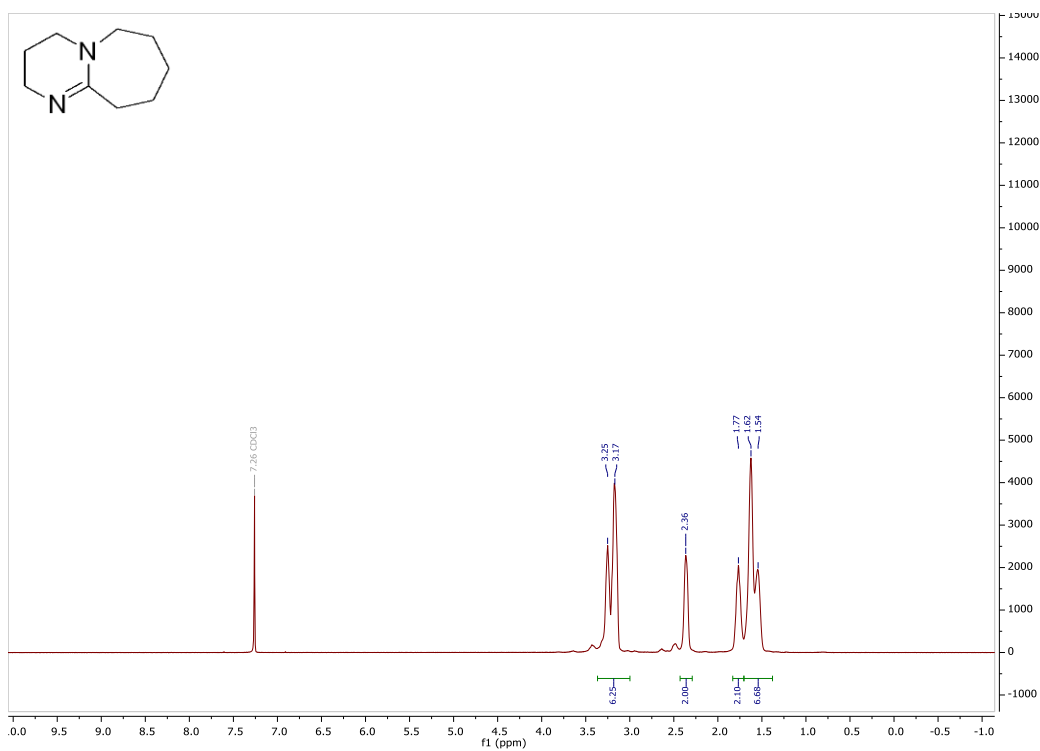

Figure S 120  $^1\text{H-NMR}$  spectrum of DBU in  $\text{CDCl}_3$ .

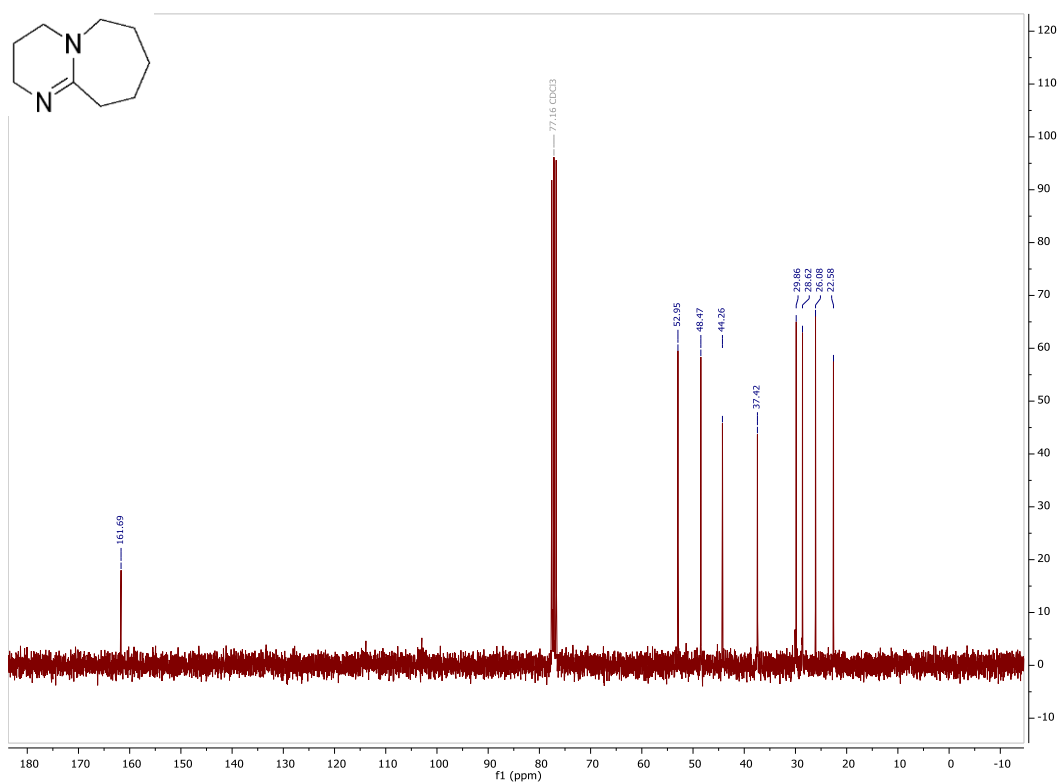

Figure S 121  $^{13}\text{C-NMR}$  spectrum of DBU in  $\text{CDCl}_3$ .

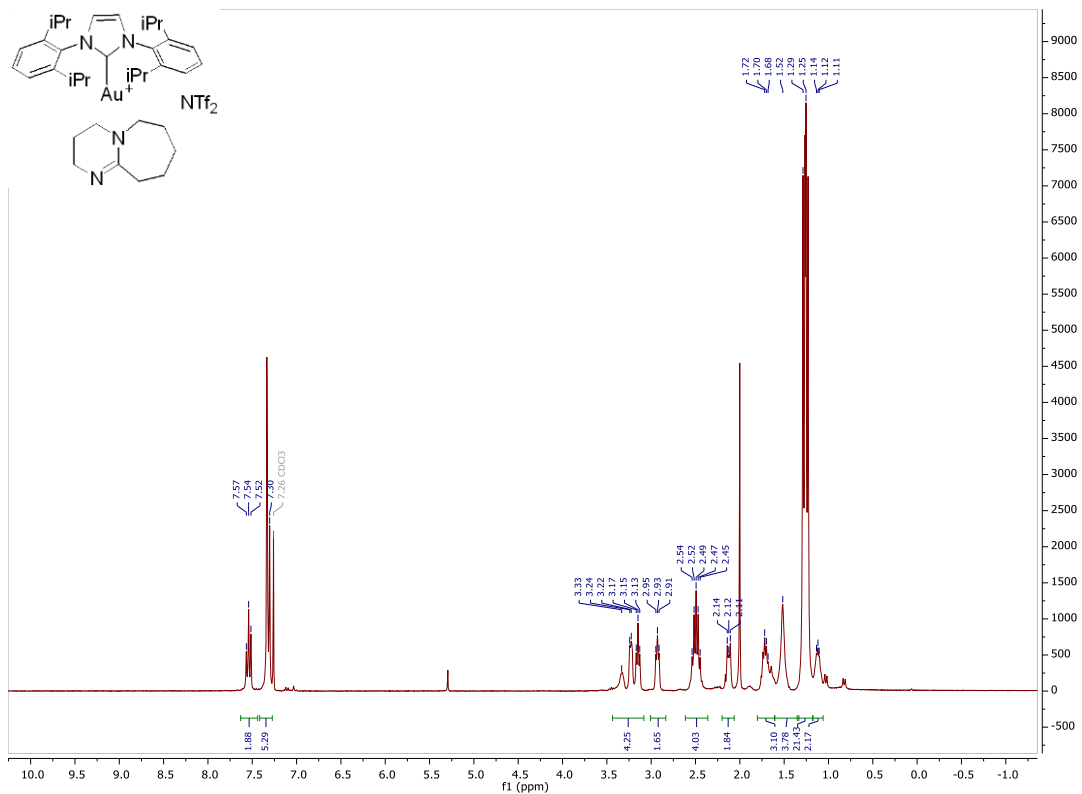

**Figure S 122**  $^1\text{H-NMR}$  spectrum of IPrAuNTf<sub>2</sub> + DBU (1:1 mixture) in CDCl<sub>3</sub>.

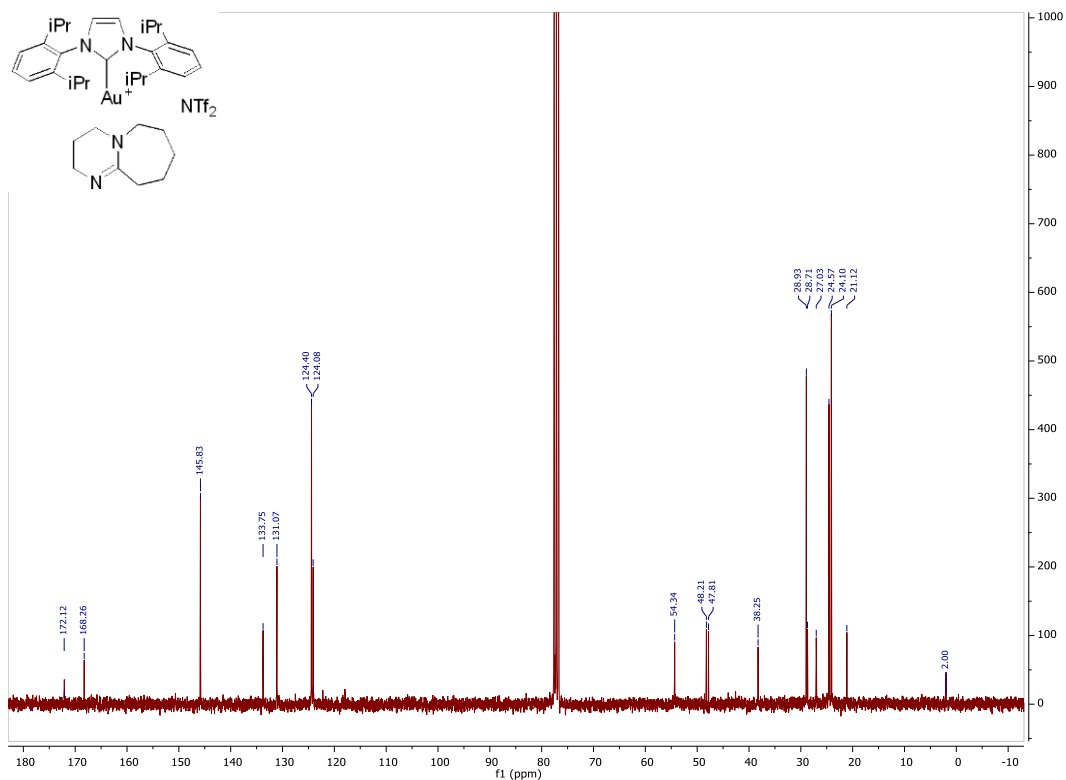

**Figure S 123**  $^{13}\text{C-NMR}$  spectrum of IPrAuNTf<sub>2</sub> + DBU (1:1 mixture) in CDCl<sub>3</sub>.

## 5. High-resolution mass spectrometry

|             |                                               |                  |                     |
|-------------|-----------------------------------------------|------------------|---------------------|
| Analysis    | D:\Data\Plenio\87421_ESI_HR_P1-E-4_01_13632.d | Acquisition Date | 23.11.2021 18:02:25 |
| Sample Name | 87421_ESI_HR                                  | Ionisation       | ESI Positive        |
| Method      | as 50-1600 1hz.m                              | Mass Range       | 50 m/z - 1600 m/z   |
| Client      | Shinozaki SNZ 210126 2a                       | Operator         | Rudolph             |

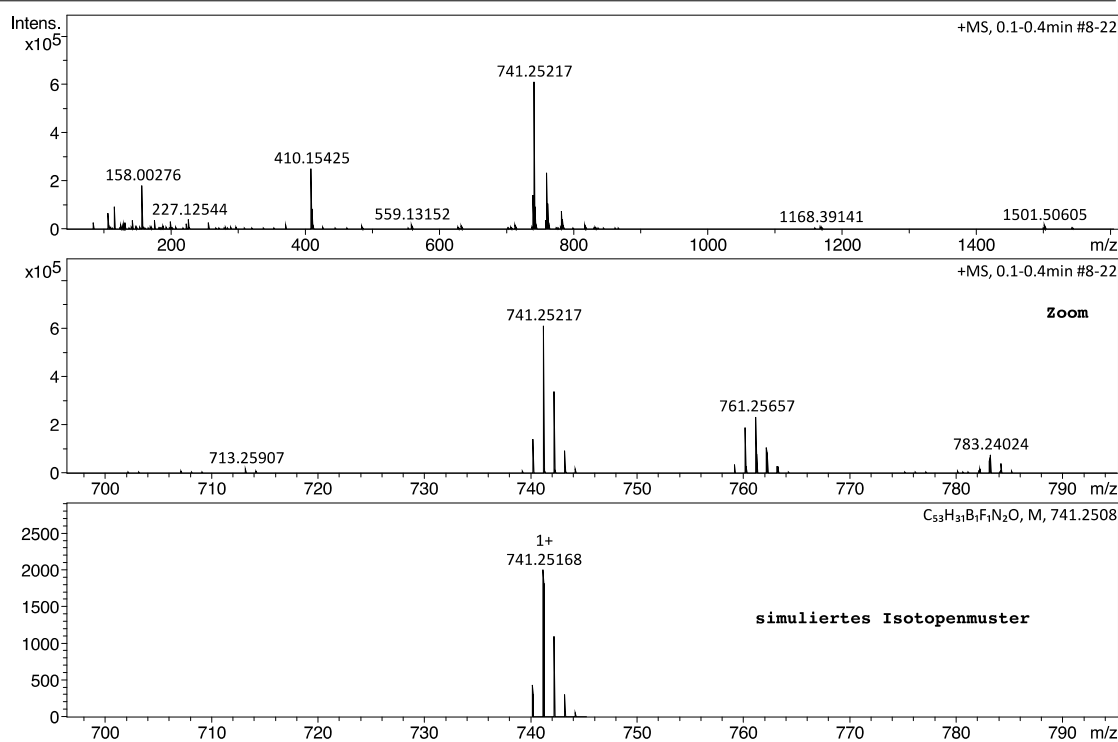

Figure S 124 HRMS spectrum of **10**. (ESI Positive)

|             |                                               |                  |                     |
|-------------|-----------------------------------------------|------------------|---------------------|
| Analysis    | D:\Data\Plenio\87417_ESI_HR_P1-E-3_01_13631.d | Acquisition Date | 23.11.2021 17:40:05 |
| Sample Name | 87417_ESI_HR                                  | Ionisation       | ESI Positive        |
| Method      | as 50-1600 1hz.m                              | Mass Range       | 50 m/z - 1600 m/z   |
| Client      | Shinozaki SNZ 2101110 3a                      | Operator         | Rudolph             |

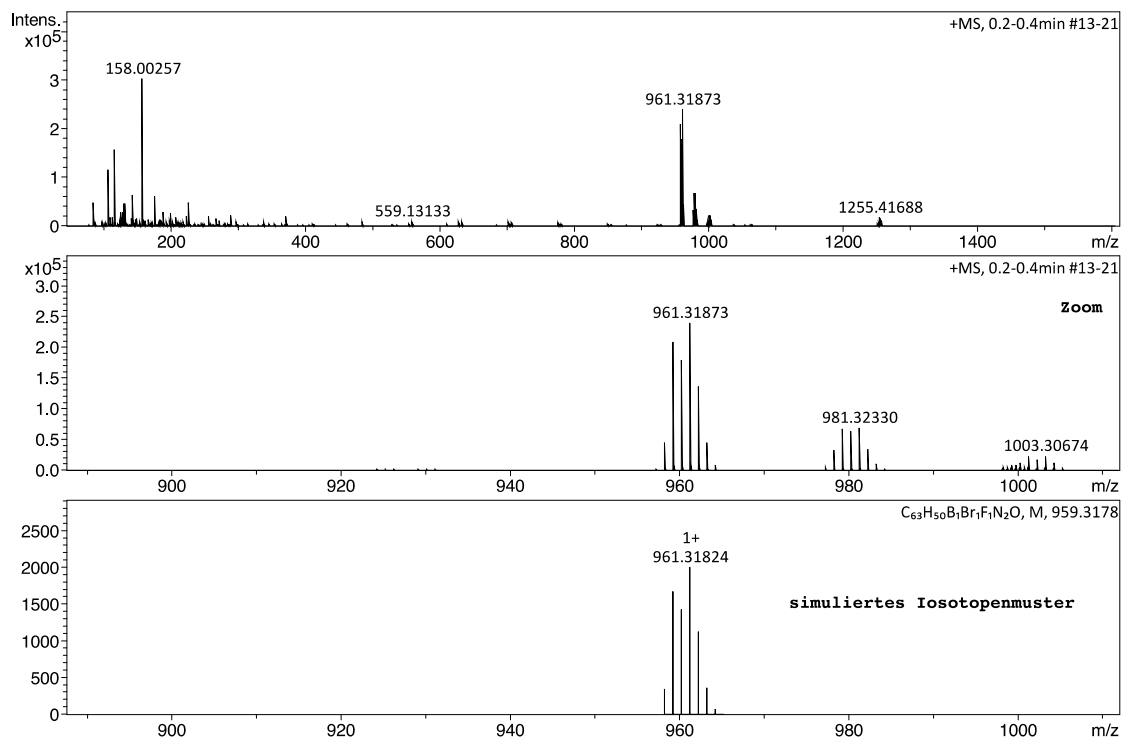

Figure S 125 HRMS spectrum of 14. (ESI Positive)

Analysis D:\Data\Plenio\87418\_ESI\_HR\_P1-E-2\_01\_13641.d Acquisition Date 23.11.2021 19:53:16  
Sample Name 87418\_ESI\_HR ionisation ES Positive  
Method as 50-2500 1hz.m Mass Range 50 m/z - 2500 m/z  
Client Shinozaki SNZ 211108 a Operator Rudolph

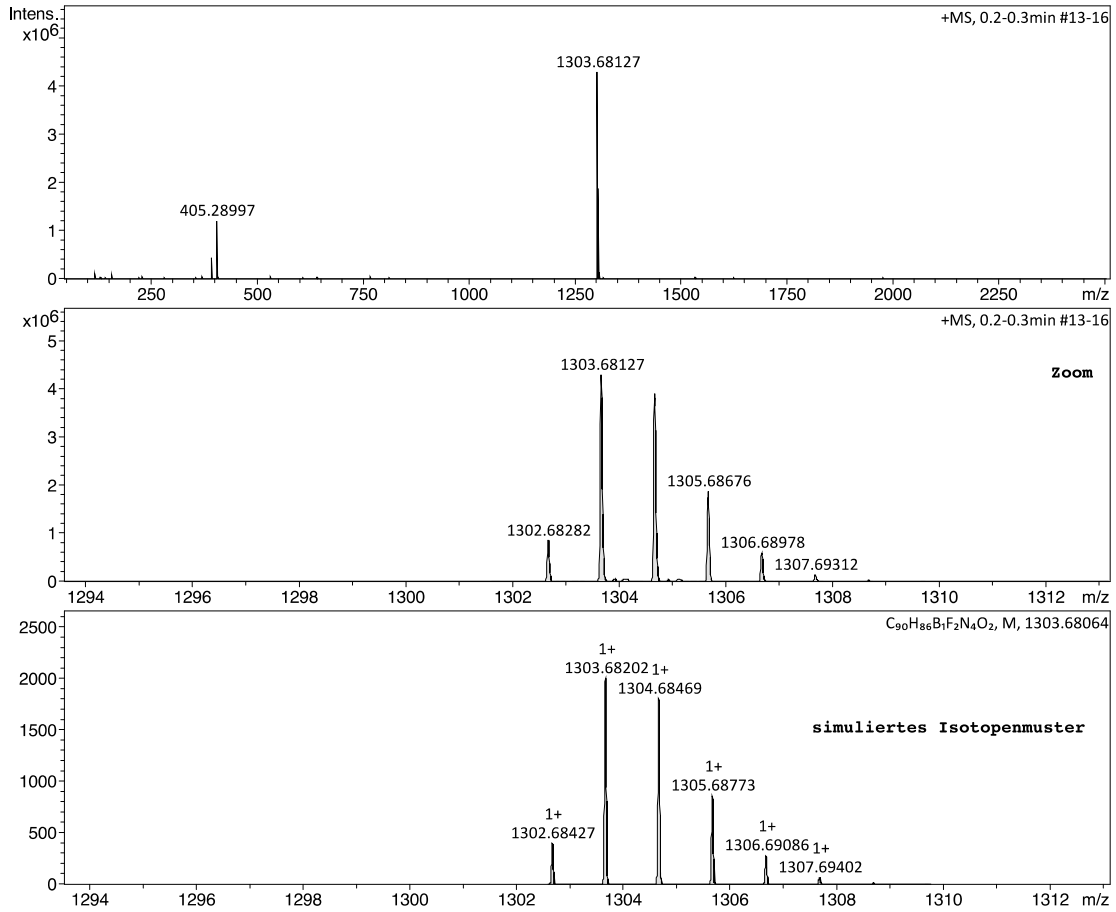

Figure S 126 HRMS spectrum of 5-HBr. (ESI Positive)

# Accurate Mass Measurement

|             |                                              |                  |                     |
|-------------|----------------------------------------------|------------------|---------------------|
| Analysis    | D:\Data\Plenio\85994_ESI_HR_P1-D-3_01_8704.d | Acquisition Date | 04_03_2021 14:43:11 |
| Sample Name | 85994_ESI_HR                                 | Ionisation       | ESI Positive        |
| Method      | as 50-1500 1hz.m                             | Mass Range       | 50 m/z - 1600 m/z   |
| Client      | Shinzaki SNZ 21020 7a                        | Operator         | Rudolph             |

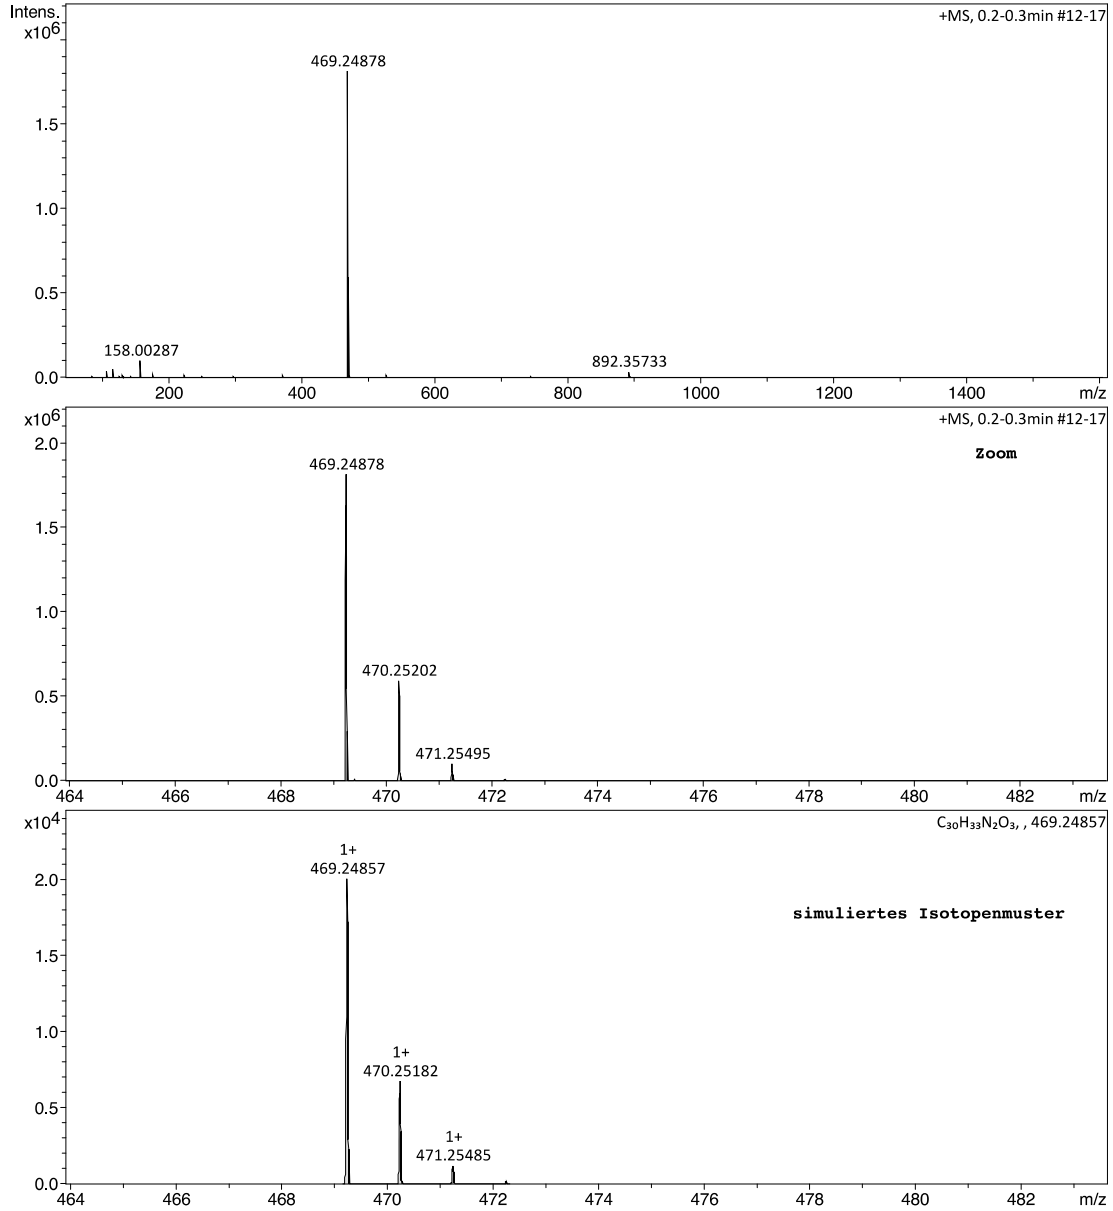

Figure S 127 HRMS spectrum of 7-HBr. (ESI Positive)



# Accurate Mass Measurement

Analysis D:\Data\Plenio\85995\_ESI\_HR\_P1-D-1\_01\_8865.d  
Sample Name 85995\_ESI\_HR  
Method as 50-1500 1hz.m  
Client Shinzaki SNZ 210209a

Acquisition Date 11.03.2021 15:15:01  
Ionisation ESI Positive  
Mass Range 50 m/z - 1600 m/z  
Operator Rudolph

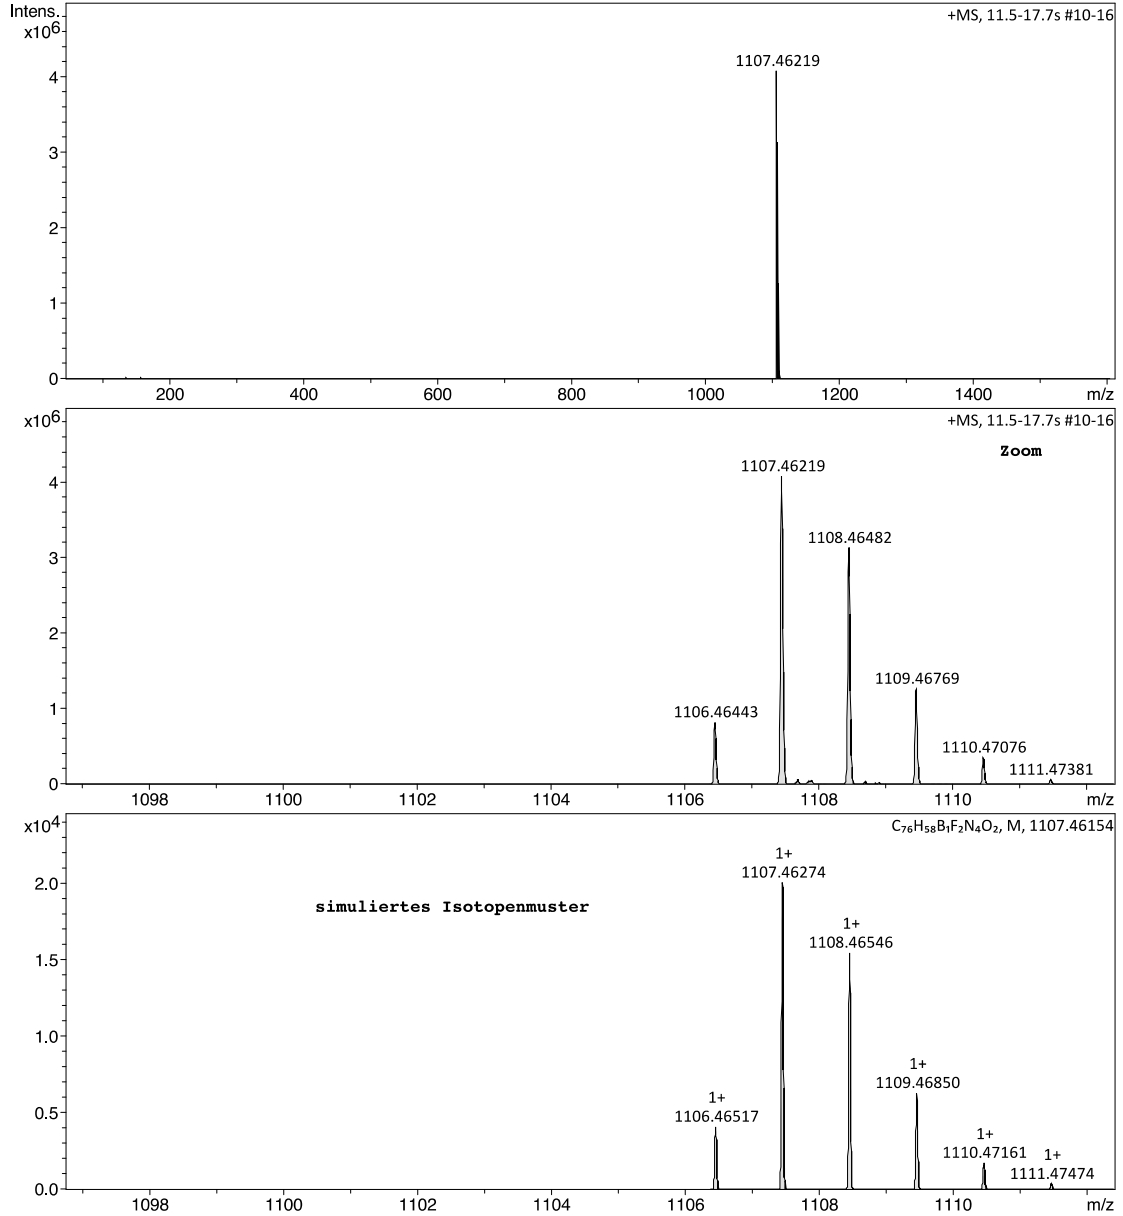

Figure S 128 HRMS spectrum of 8-HBr. (ESI Positive)

## Accurate Mass Measurement

|             |                                              |                  |                     |
|-------------|----------------------------------------------|------------------|---------------------|
| Analysis    | D:\Data\Plenio\86034_ESI_HR_P1-C-2_01_8999.d | Acquisition Date | 17.03.2021 15:46:57 |
| Sample Name | 86034_ESI_HR                                 | Ionisation       | ESI Positive        |
| Method      | as 50-2000a 1hz.m                            | Mass Range       | 50 m/z - 2000 m/z   |
| Client      | Shinozaki SNZ 210310-2a                      | Operator         | Rudolph             |

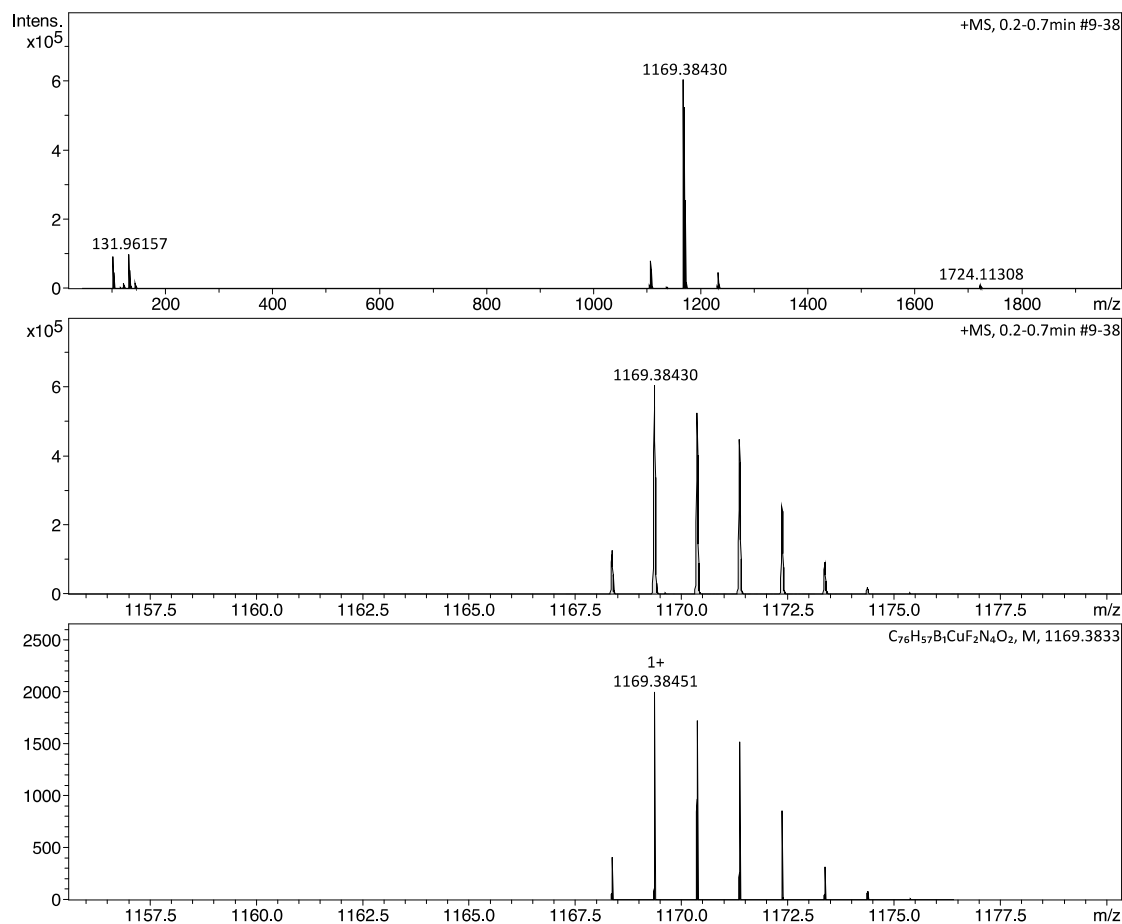

Figure S 129 HRMS spectrum of [CuBr(8)]. (ESI Positive)

## Accurate Mass Measurement

|             |                                              |                  |                     |
|-------------|----------------------------------------------|------------------|---------------------|
| Analysis    | D:\Data\Plenio\85992_ESI_HR_P1-C-2_01_8875.d | Acquisition Date | 11.03.2021 18:05:50 |
| Sample Name | 85992_ESI_HR                                 | Ionisation       | ESI Positive        |
| Method      | as 50-3000.m                                 | Mass Range       | 50 m/z - 3000 m/z   |
| Client      | Shinzaki SNZ 210218-2a                       | Operator         | Rudolph             |

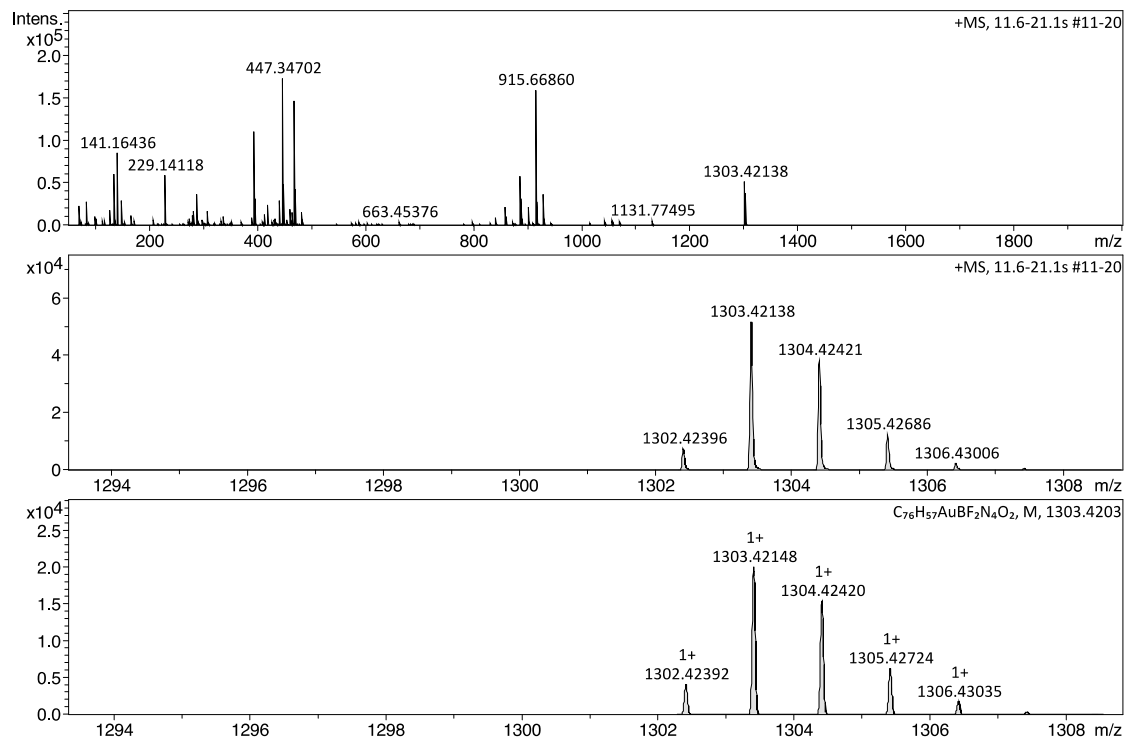

Figure S 130 HRMS spectrum of  $[AuCl(8)]$ . (ESI Positive)

## Accurate Mass Measurement

|             |                                              |                  |                     |
|-------------|----------------------------------------------|------------------|---------------------|
| Analysis    | D:\Data\Plenio\85990_ESI_HR_P1-D-3_01_8715.d | Acquisition Date | 04.03.2021 18:58:12 |
| Sample Name | 85990_ESI_HR                                 | Ionisation       | ESI Positive        |
| Method      | as 50-2000a 1hz.m                            | Mass Range       | 50 m/z - 2000 m/z   |
| Client      | Shinzaki SNZ 210220 - 2a                     | Operator         | Rudolph             |

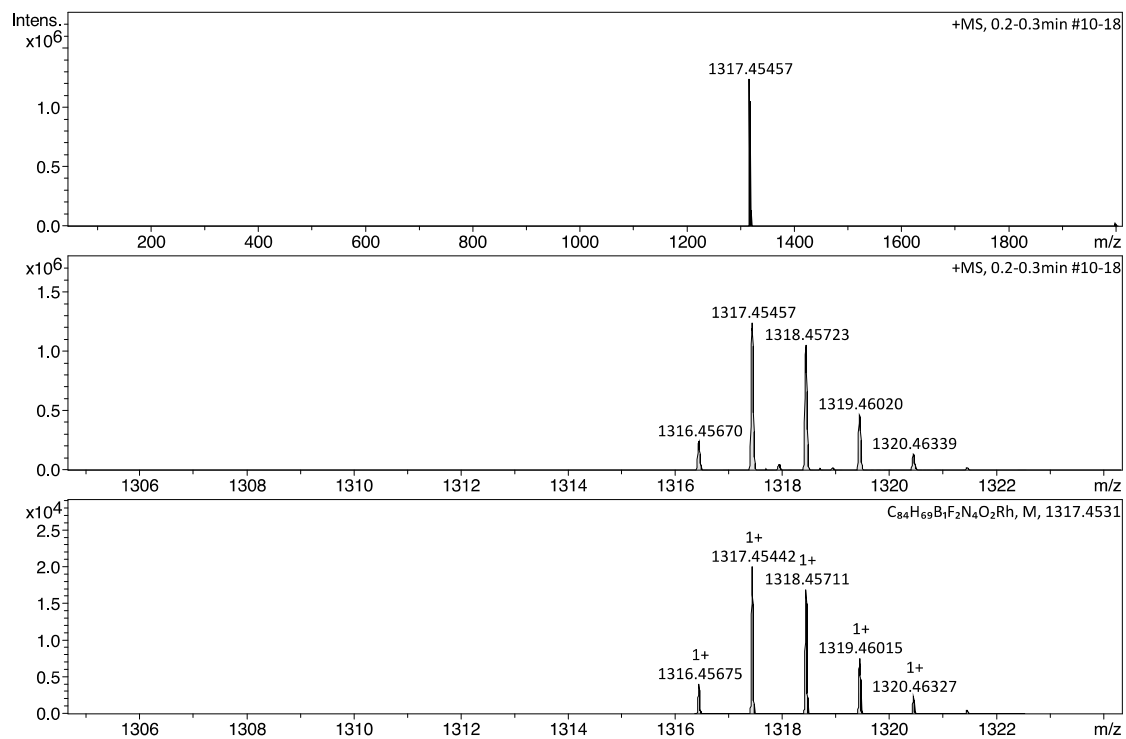

Figure S 131 HRMS spectrum of [RhCl(cod)(8)]. (ESI Positive)

## Accurate Mass Measurement

|             |                                              |                  |                     |
|-------------|----------------------------------------------|------------------|---------------------|
| Analysis    | D:\Data\Plenio\85988_ESI_HR_P1-C-1_01_8873.d | Acquisition Date | 11.03.2021 17:00:42 |
| Sample Name | 85988_ESI_HR                                 | Ionisation       | ESI Positive        |
| Method      | as 50-3000.m                                 | Mass Range       | 50 m/z - 3000 m/z   |
| Client      | Shinzaki SNZ 210222-2a                       | Operator         | Rudolph             |

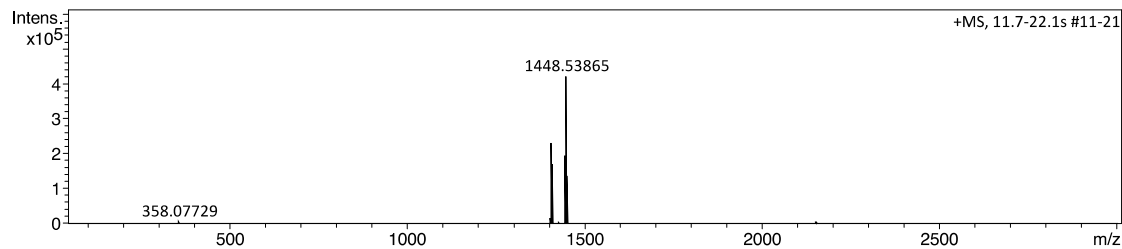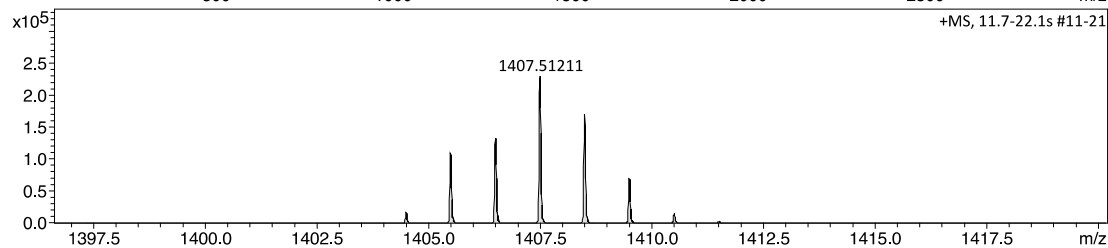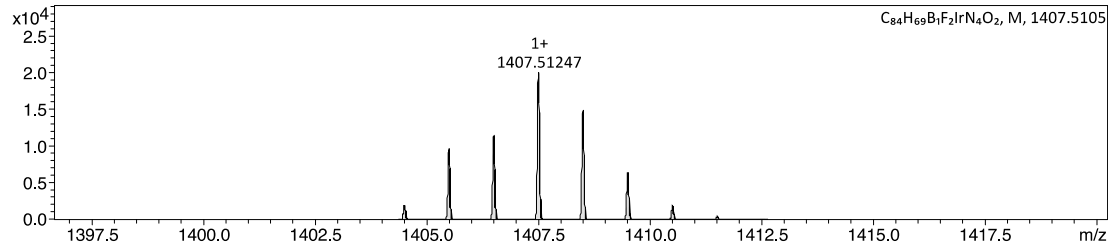

Figure S 132 HRMS spectrum of [IrCl(cod)(**8**)]. (ESI Positive)

## Accurate Mass Measurement

Analysis D:\Data\Plenio\85986\_ESI\_HR\_P1-D-1\_01\_8871.d  
Sample Name 85986\_ESI\_HR  
Method as 50-3000.m  
Client Shinzaki SNZ 210223-2a

Acquisition Date 11.03.2021 16:43:41  
Ionisation ESI Positive  
Mass Range 50 m/z - 3000 m/z  
Operator Rudolph

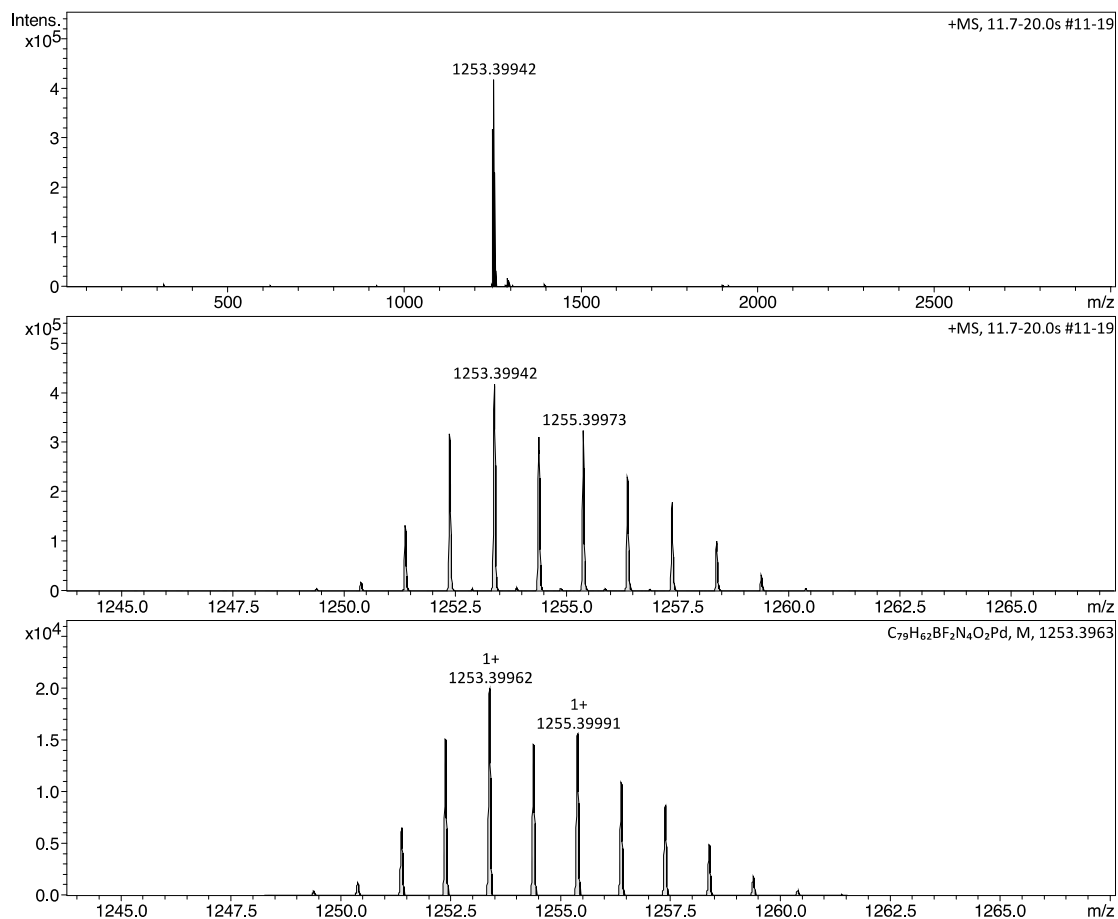

**Figure S 133** HRMS spectrum [Pd(allyl)Cl(8)]. (ESI Positive)

## Accurate Mass Measurement

|             |                                              |                  |                     |
|-------------|----------------------------------------------|------------------|---------------------|
| Analysis    | D:\Data\Plenio\85996_ESI_HR_P1-D-4_01_8705.d | Acquisition Date | 04.03.2021 14:48:07 |
| Sample Name | 85996_ESI_HR                                 | Ionisation       | ESI Positive        |
| Method      | as 50-1500 1hz.m                             | Mass Range       | 50 m/z - 1600 m/z   |
| Client      | Shinzaki SNZ 21021 6a                        | Operator         | Rudolph             |

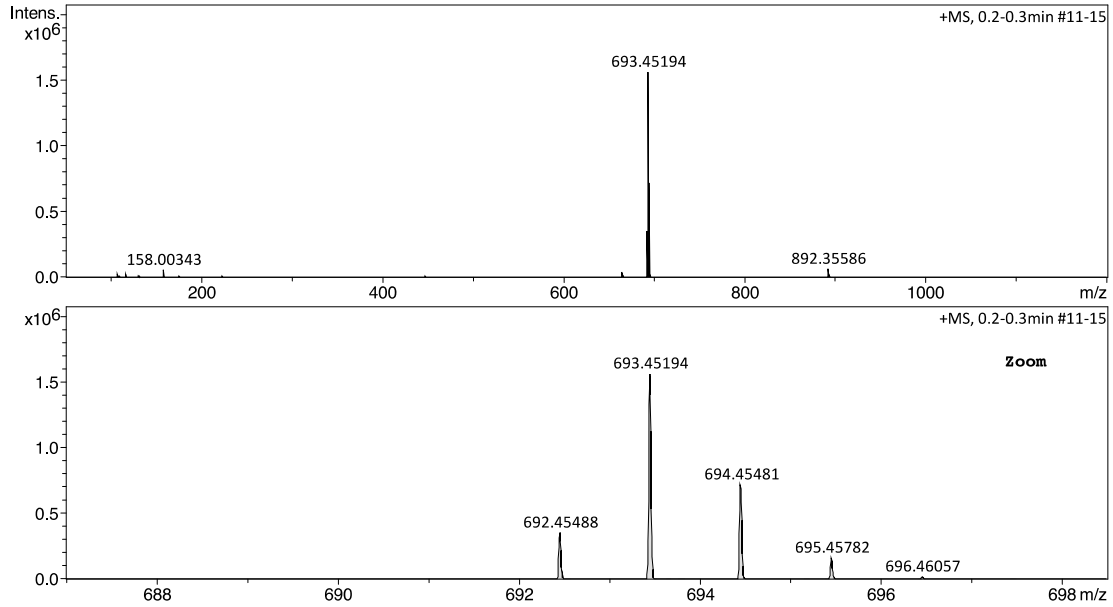

**Figure S 134** HRMS spectrum of **9-HBr**. (ESI Positive)

## Accurate Mass Measurement

|             |                                              |                  |                     |
|-------------|----------------------------------------------|------------------|---------------------|
| Analysis    | D:\Data\Plenio\85991_ESI_HR_P1-D-2_01_8708.d | Acquisition Date | 04.03.2021 17:18:31 |
| Sample Name | 85991_ESI_HR                                 | Ionisation       | ESI Positive        |
| Method      | as 50-1500 1hz.m                             | Mass Range       | 50 m/z - 1600 m/z   |
| Client      | Shinzaki SNZ 210220 - 1a                     | Operator         | Rudolph             |

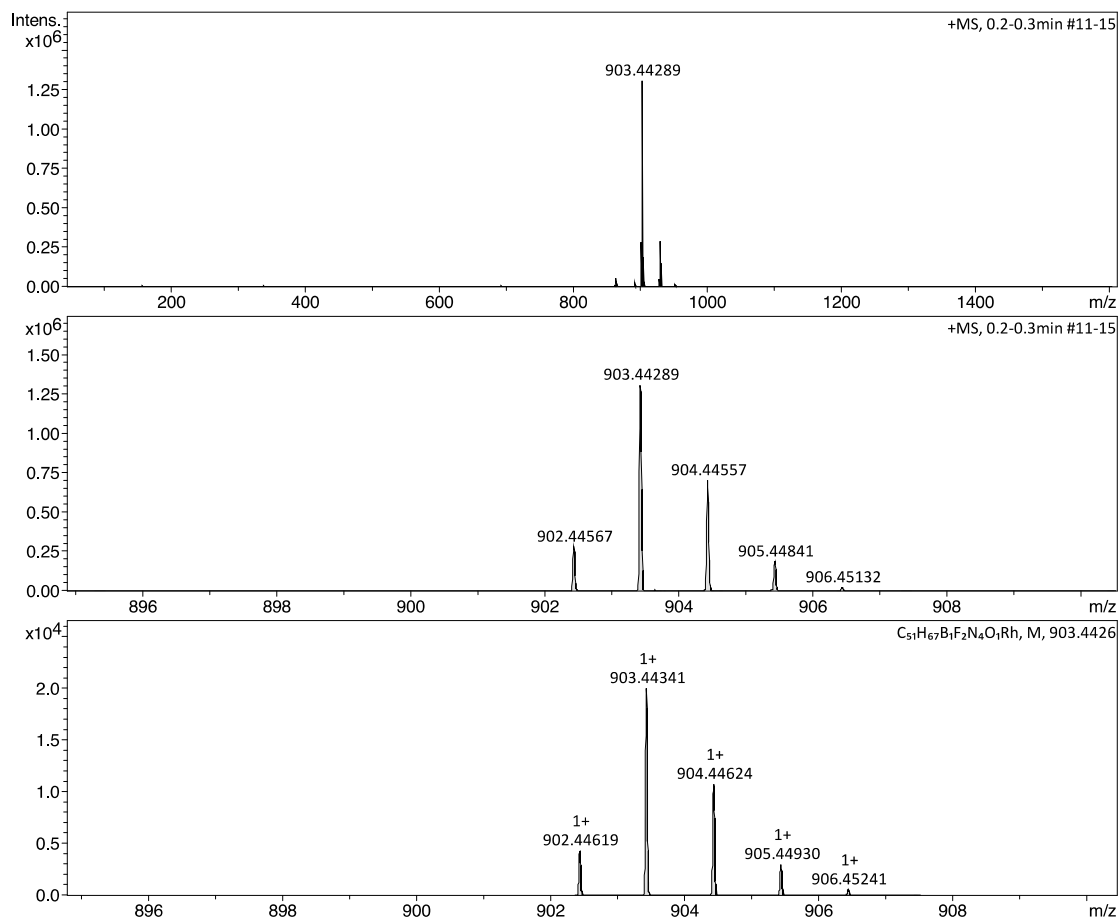

**Figure S 135** HRMS spectrum of [RhCl(cod)(9)]. (ESI Positive)



## Accurate Mass Measurement

|             |                                              |                  |                     |
|-------------|----------------------------------------------|------------------|---------------------|
| Analysis    | D:\Data\Plenio\85989_ESI_HR_P1-D-2_01_8713.d | Acquisition Date | 04.03.2021 18:23:58 |
| Sample Name | 85989_ESI_HR                                 | Ionisation       | ESI Positive        |
| Method      | as 50-1500 1hz.m                             | Mass Range       | 50 m/z - 1600 m/z   |
| Client      | Shinzaki SNZ 210222 - 1a                     | Operator         | Rudolph             |

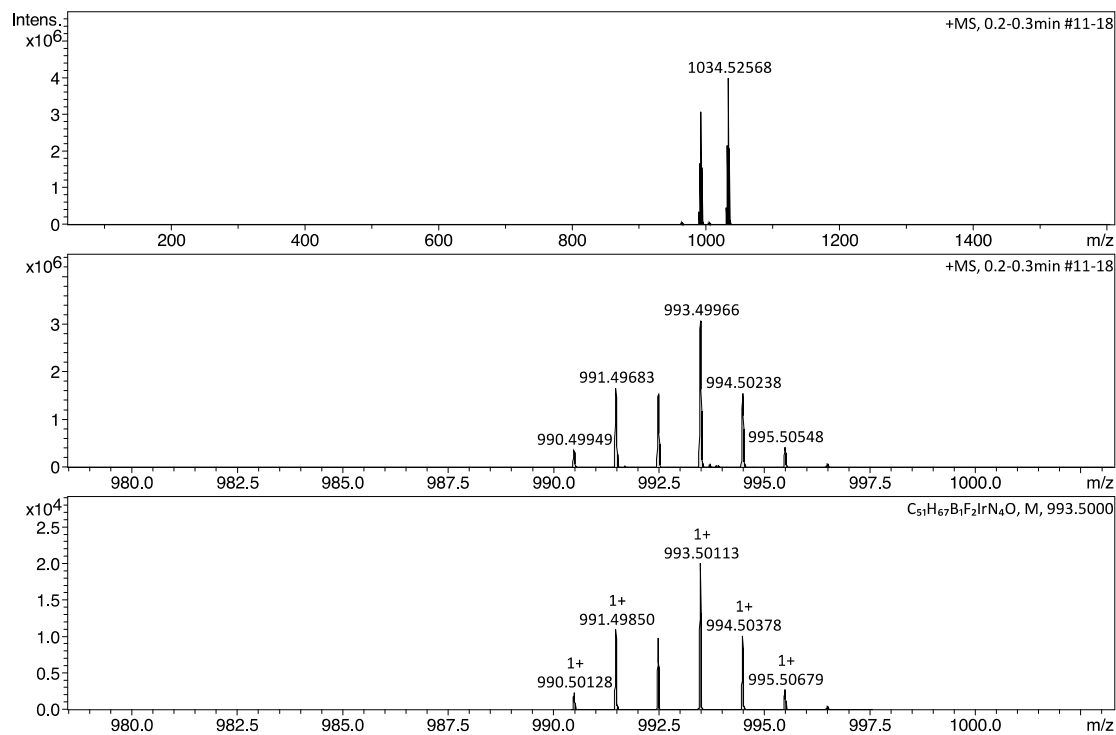

Figure S 136 HRMS spectrum of [IrCl(cod)(9)]. (ESI Positive)

## Accurate Mass Measurement

Analysis D:\Data\Plenio\85987\_ESI\_HR\_P1-D-1\_01\_8706.d  
Sample Name 85987\_ESI\_HR  
Method as 50-1500 1hz.m  
Client Shinzaki SNZ 210223-1a

Acquisition Date 04.03.2021 15:06:41  
Ionisation ESI Positive  
Mass Range 50 m/z - 1600 m/z  
Operator Rudolph

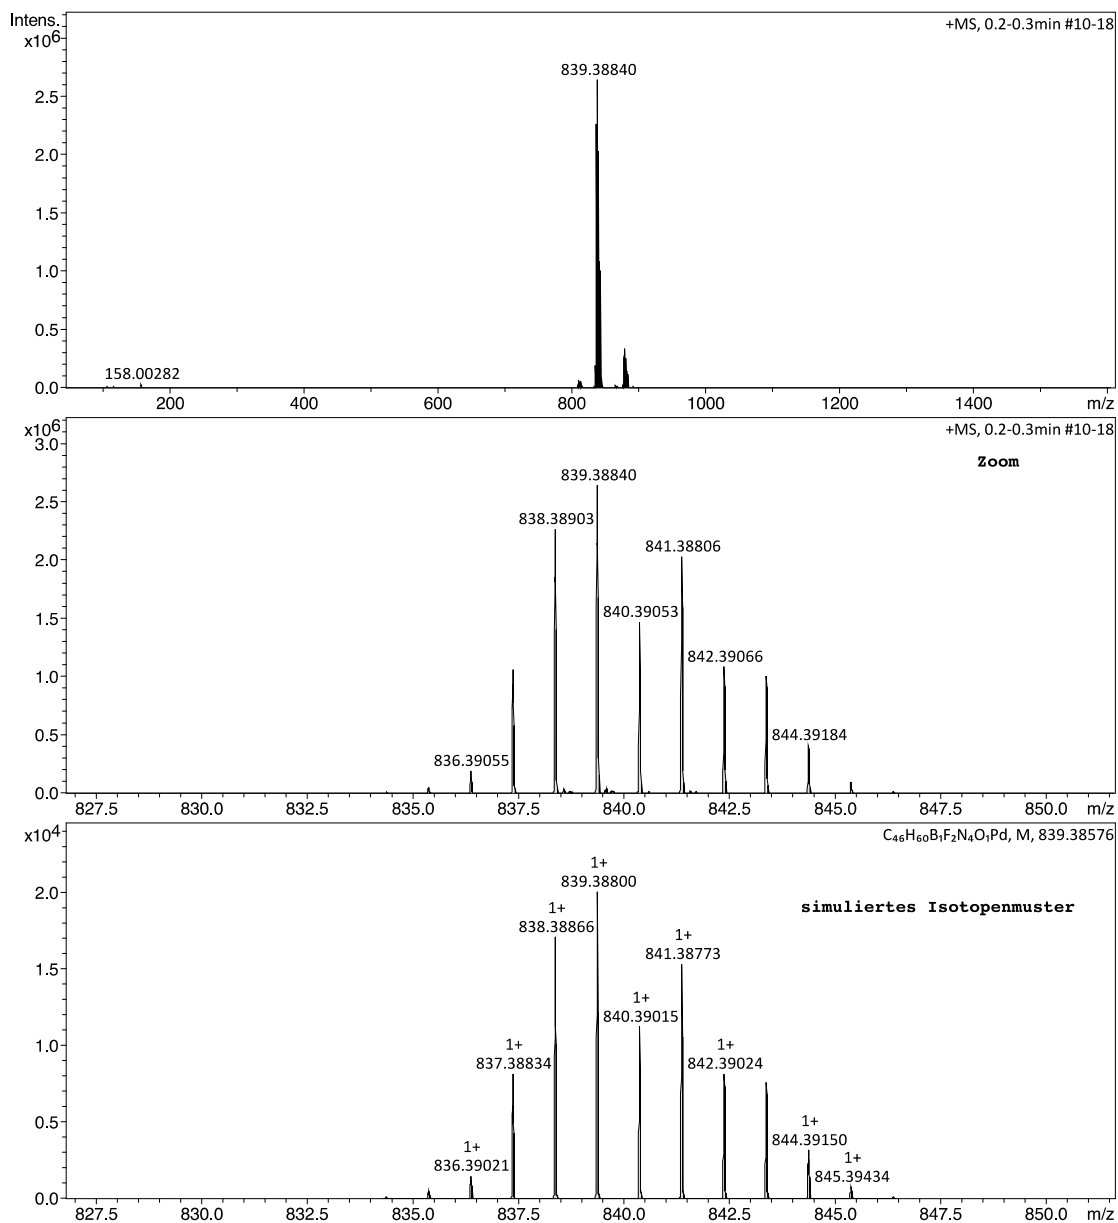

**Figure S 137** HRMS spectrum of [Pd(allyl)Cl(9)]. (ESI Positive)

|             |                                               |                  |                     |
|-------------|-----------------------------------------------|------------------|---------------------|
| Analysis    | D:\Data\Plenio\87415_ESI_HR_P1-E-1_01_13626.d | Acquisition Date | 23.11.2021 16:15:11 |
| Sample Name | 87415_ESI_HR                                  | Ionisation       | ESI Positive        |
| Method      | as 50-2500 1hz.m                              | Mass Range       | 50 m/z - 2500 m/z   |
| Client      | Shinozaki SNZ 211025 b                        | Operator         | Rudolph             |

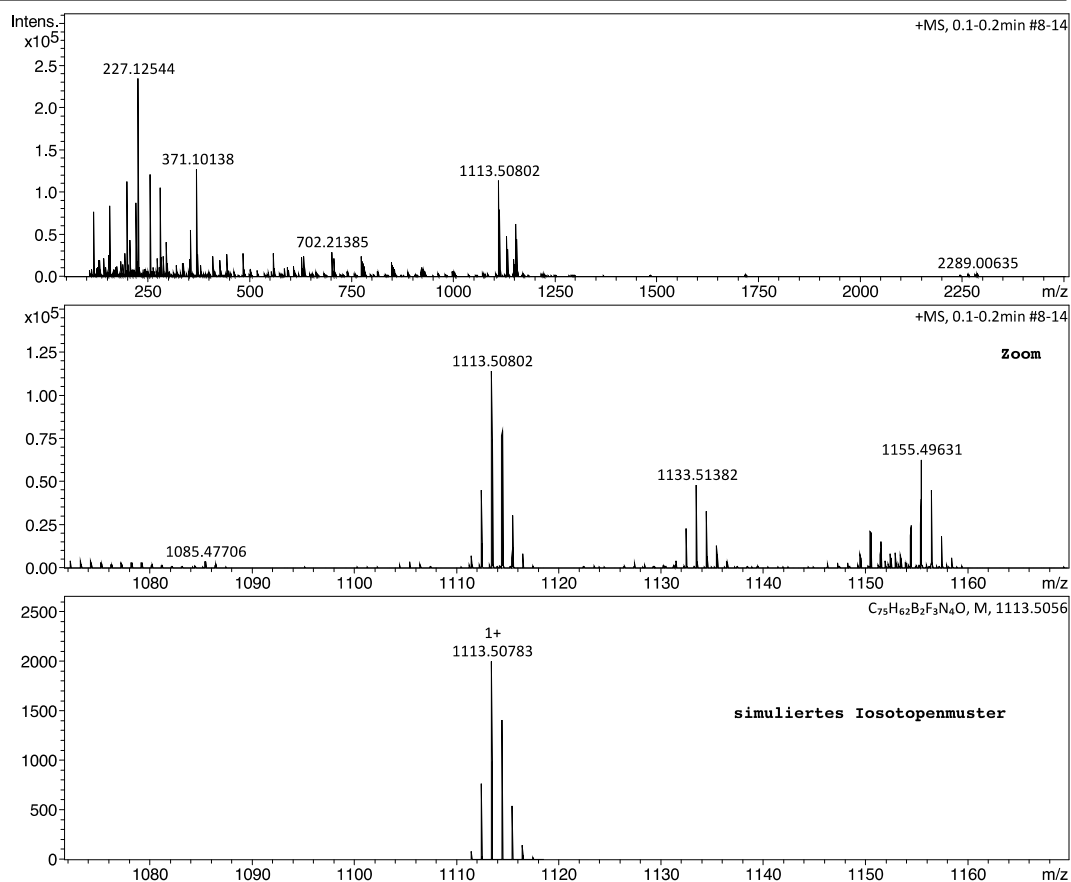

Figure S 138 HRMS spectrum of 12. (ESI Positive)

Analysis D:\Data\Plenio\89408\_ESI\_HR\_P1-E-2\_01\_20295.d  
 Sample Name 89408\_ESI\_HR  
 Method as 50-3000\_tune.m  
 Client Popov AuCl\_NHC\_red

Acquisition Date 30.08.2022 14:15:19  
 Ionisation ESI Positive  
 Mass Range 50 m/z - 3000 m/z  
 Operator Rudolph

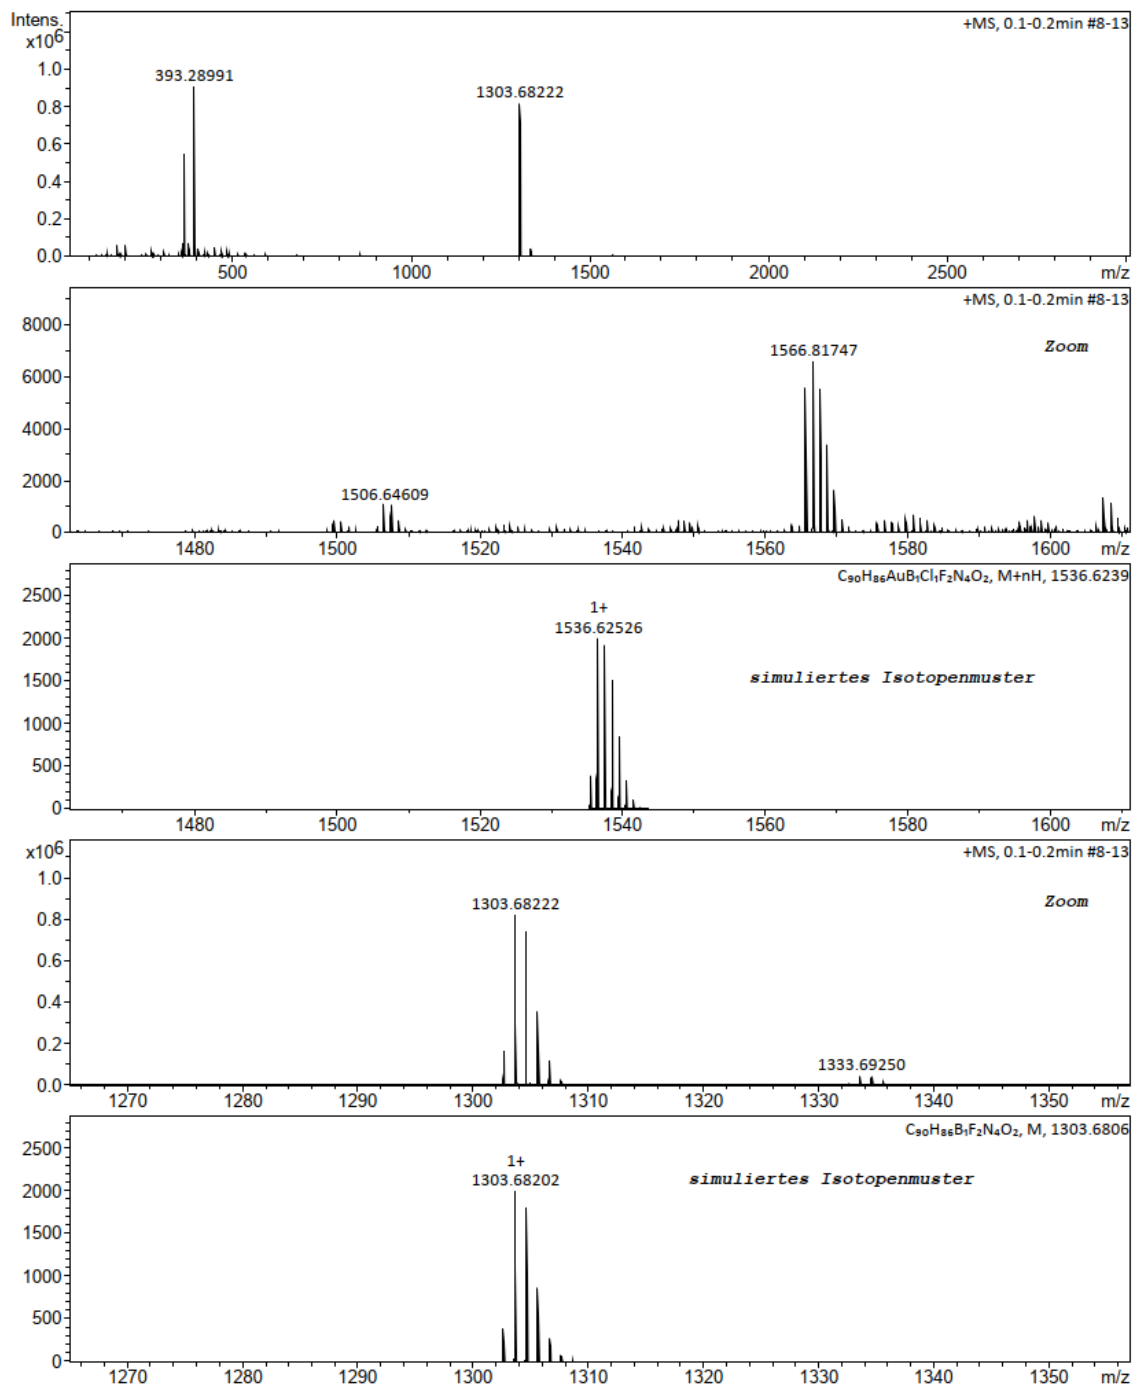

| # | Meas. m/z  | m/z        | Ion Formula                                                                   | Adduct | Sum Formula                                                                   | err  [mDa] | err  [ppm] | mSigma | e <sup>-</sup> | Conf | z  |
|---|------------|------------|-------------------------------------------------------------------------------|--------|-------------------------------------------------------------------------------|------------|------------|--------|----------------|------|----|
| 1 | 1303.68222 | 1303.68064 | C <sub>90</sub> H <sub>86</sub> BF <sub>2</sub> N <sub>4</sub> O <sub>2</sub> | M      | C <sub>90</sub> H <sub>86</sub> BF <sub>2</sub> N <sub>4</sub> O <sub>2</sub> | 0.20       | 0.16       | 3.3    | even           |      | 1+ |

Figure S 139 HRMS spectrum of [AuCl (NHC\_red)]. (ESI Positive)



# Mass spectrum

|             |                                                   |                  |                     |          |
|-------------|---------------------------------------------------|------------------|---------------------|----------|
| Analysis    | D:\Data\Plenio\89122_neg_ESI_HR_P1-E-1_01_18795.d | Acquisition Date | 24.06.2022 16:16:58 |          |
| Sample Name | 89122_neg_ESI_HR                                  | Ionisation       | ESI                 | Negative |
| Method      | as 50-3000_neg.m                                  | Mass Range       | 50 m/z - 3000 m/z   |          |
| Client      | Popov green-red IPrAu ion pair                    | Operator         | Rudolph             |          |

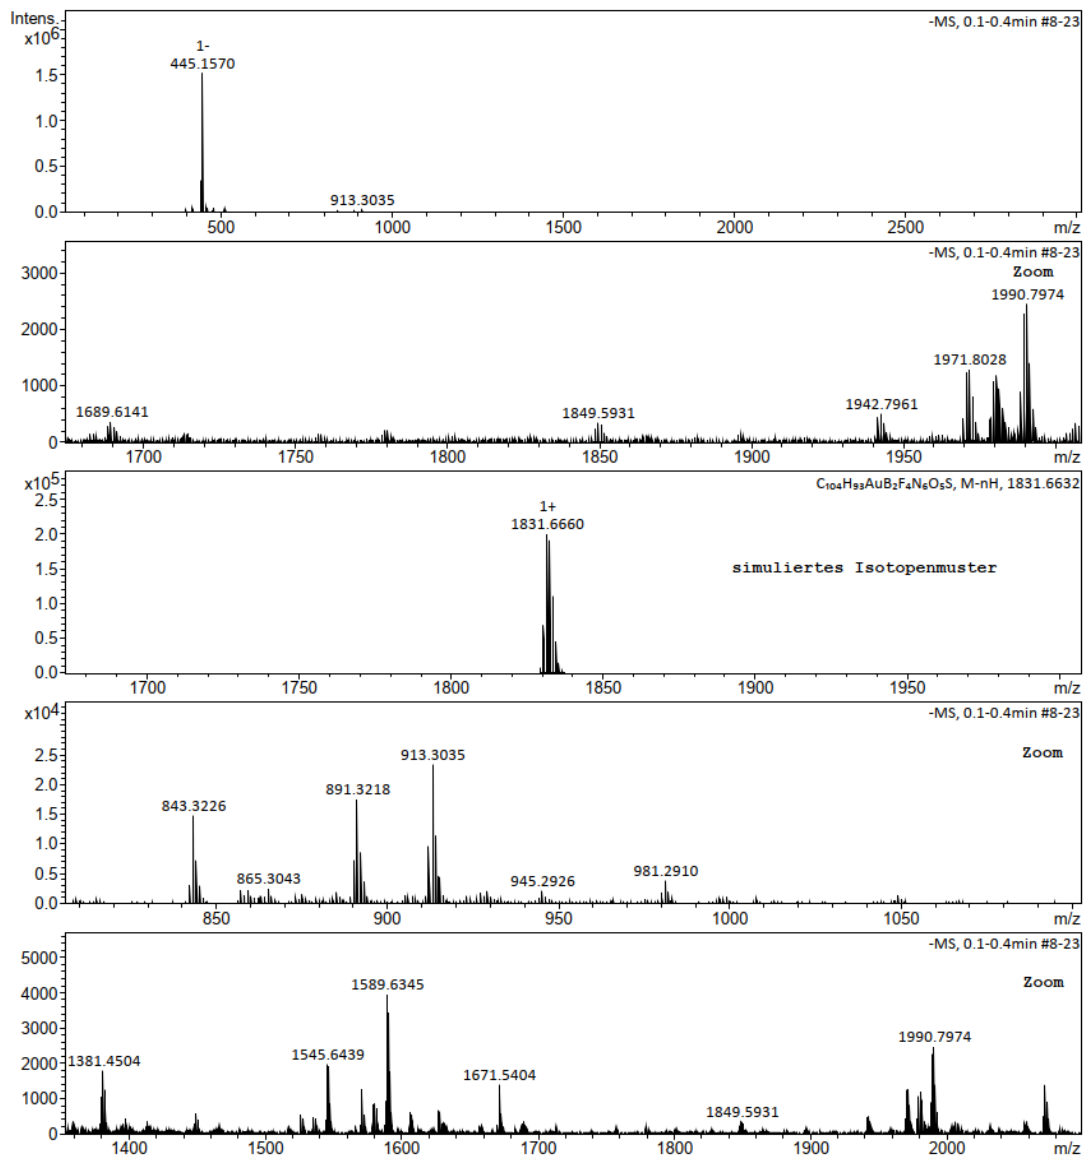

Figure S 141 HRMS spectrum of 18. (ESI Negative)

Analysis D:\Data\Plenio\89122\_ESI\_HR\_P1-E-1\_01\_18732.d  
 Sample Name 89122\_ESI\_HR  
 Method as 50-3000.m  
 Client Popov green-red IPrAu ion pair

Acquisition Date 23.06.2022 13:41:44  
 Ionisation ESI Positive  
 Mass Range 50 m/z - 3000 m/z  
 Operator Rudolph

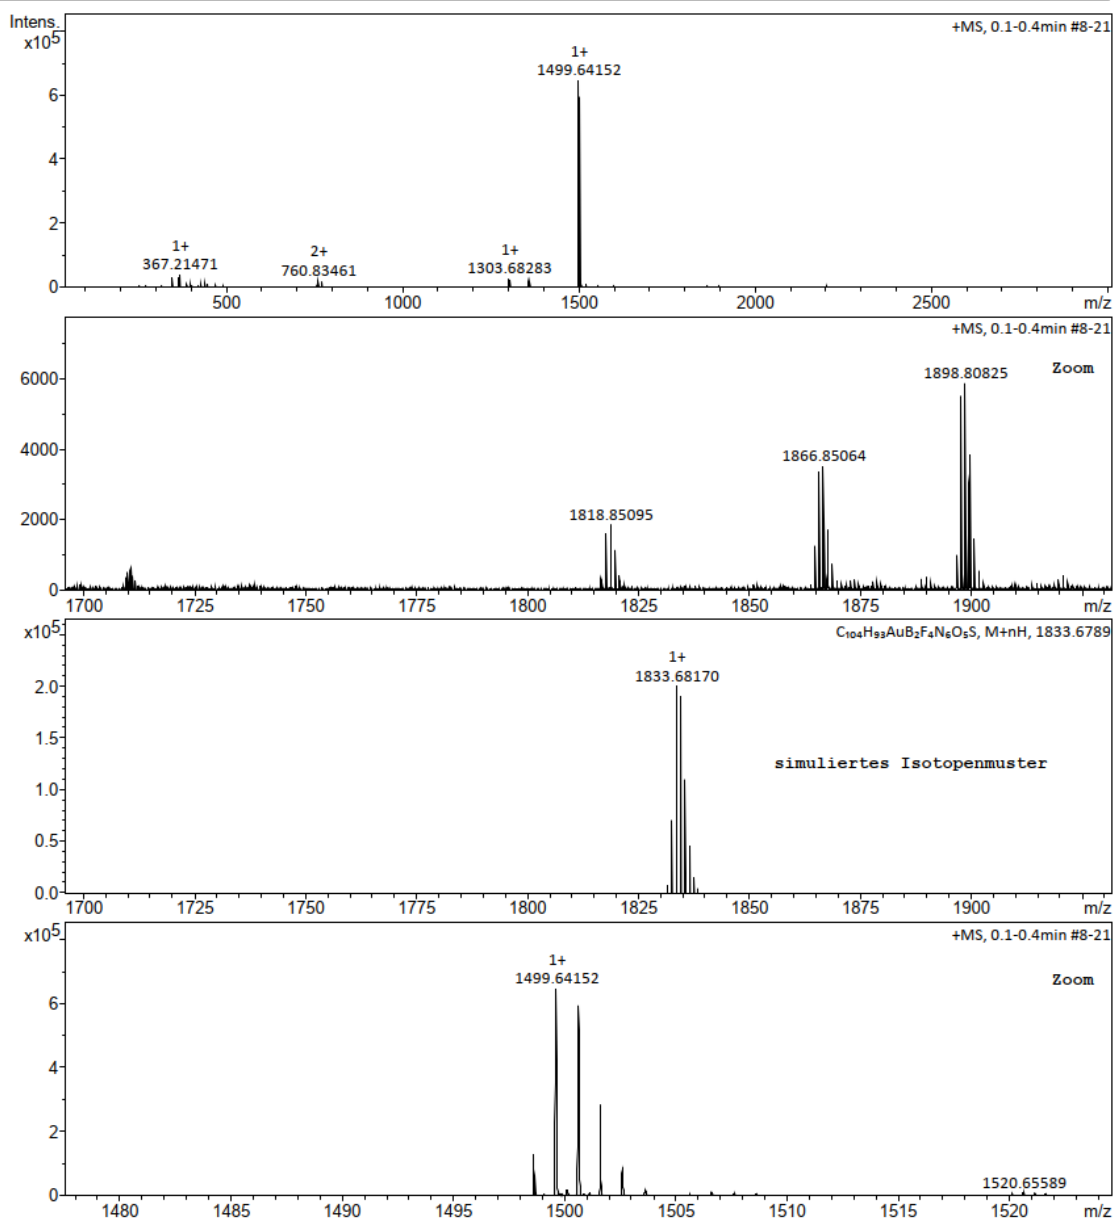

| # | Meas. m/z  | m/z        | Ion Formula       | Adduct | Sum Formula       | err  [mDa] | err  [ppm] | mSigma | e <sup>-</sup> | Conf | z |
|---|------------|------------|-------------------|--------|-------------------|------------|------------|--------|----------------|------|---|
| 1 | 1499.64152 | 1499.63988 | C79H90AuBF3N6O5S  | M+H    | C79H89AuBF3N6O5S  | 0.39       | 0.26       | 41.3   | even           | 1+   |   |
| 2 | 1499.64152 | 1499.63816 | C75H89AuB2F5N6O5S | M+H    | C75H88AuB2F5N6O5S | 1.14       | 0.76       | 104.9  | even           | 1+   |   |

Figure S 142 HRMS spectrum of 18. (ESI Positive)

Analysis D:\Data\Plenio\89125\_ESI\_HR\_P1-E-2\_01\_18724.d  
 Sample Name 89125\_ESI\_HR  
 Method as 50-1600 1hz.m  
 Client Popov IMes OalkylNHBoc

Acquisition Date 23.06.2022 12:34:17  
 Ionisation ESI Positive  
 Mass Range 50 m/z - 1600 m/z  
 Operator Rudolph

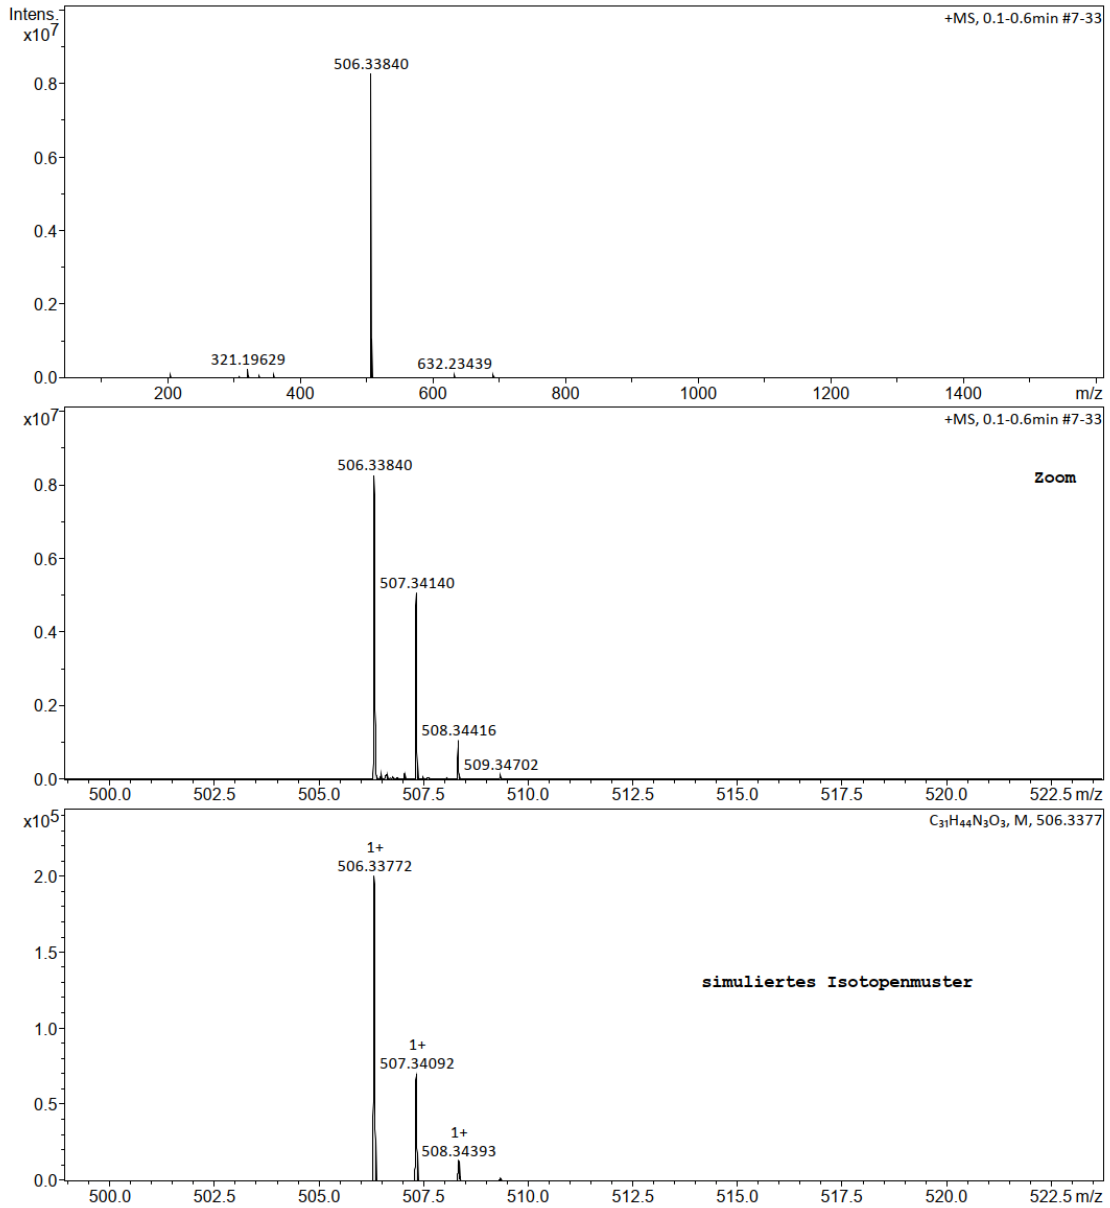

| # | Meas. m/z | m/z       | Ion Formula                                                   | Adduct | Sum Formula                                                   | err  [mDa] | err  [ppm] | mSigma | e <sup>-</sup> Conf | z  |
|---|-----------|-----------|---------------------------------------------------------------|--------|---------------------------------------------------------------|------------|------------|--------|---------------------|----|
| 1 | 506.33840 | 506.33772 | C <sub>31</sub> H <sub>44</sub> N <sub>3</sub> O <sub>3</sub> | M      | C <sub>31</sub> H <sub>44</sub> N <sub>3</sub> O <sub>3</sub> | 0.68       | 1.35       | 133.8  | even                | 1+ |

**Figure S 143** HRMS spectrum of **IMes·HCl**. (ESI Positive)



Analysis D:\Data\Plenio\89124\_ESI\_HR\_P1-E-1\_01\_18721.d  
 Sample Name 89124\_ESI\_HR  
 Method as 50-1600 1hz.m  
 Client Popov IMes salt with NHbodipy

Acquisition Date 23.06.2022 12:14:14  
 Ionisation ESI Positive  
 Mass Range 50 m/z - 1600 m/z  
 Operator Rudolph

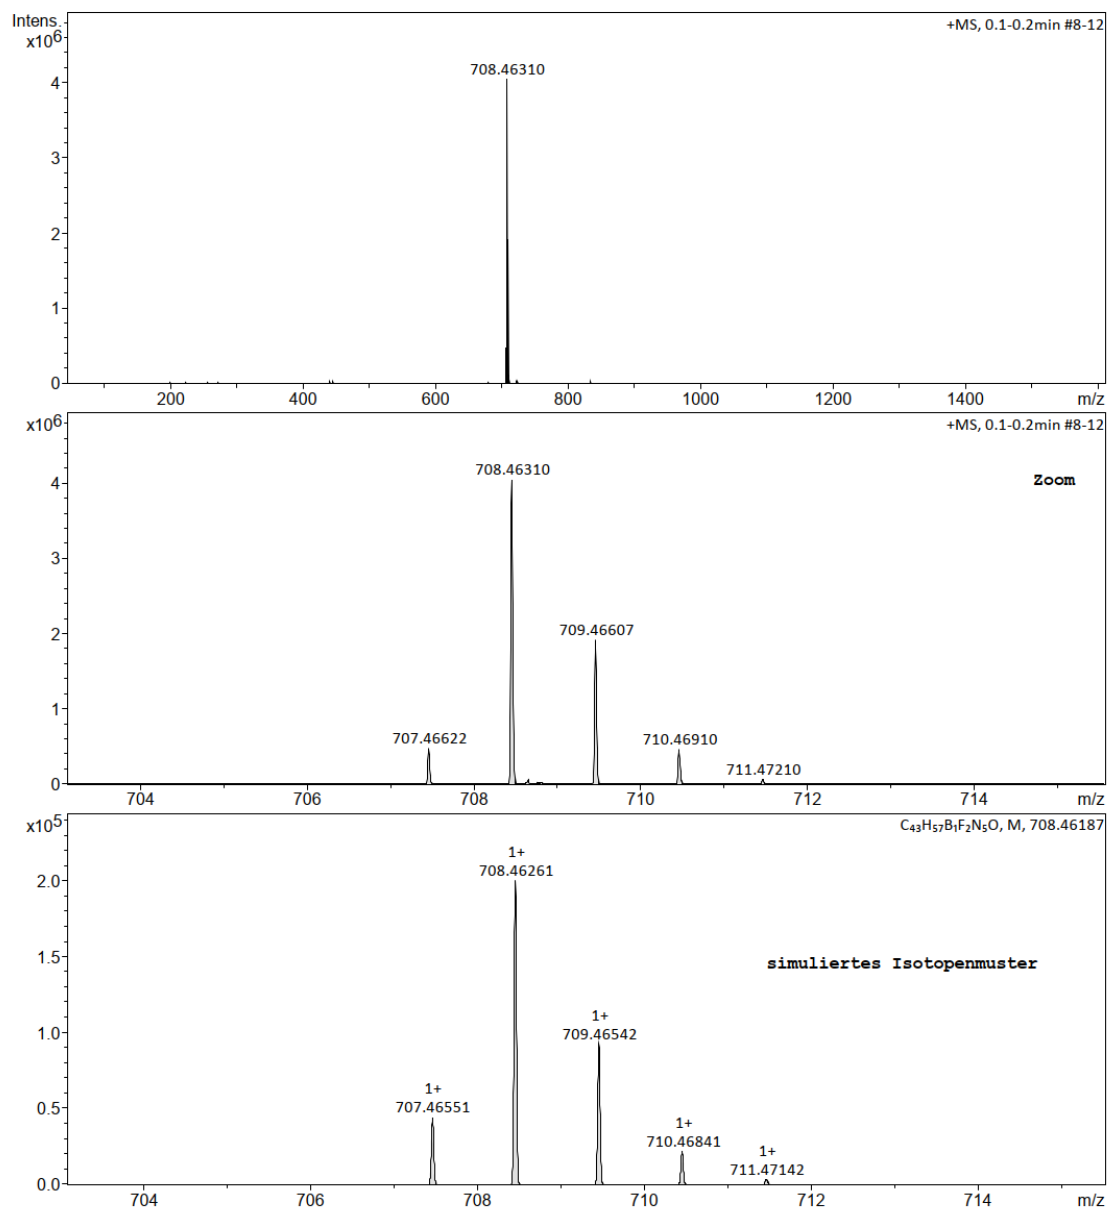

| # | Meas. m/z | m/z       | Ion Formula  | Adduct | Sum Formula  | err  [mDa] | err  [ppm] | mSigma | e <sup>-</sup> Conf | z  |
|---|-----------|-----------|--------------|--------|--------------|------------|------------|--------|---------------------|----|
| 1 | 708.46310 | 708.46187 | C43H57BF2N5O | M      | C43H57BF2N5O | 0.49       | 0.69       | 46.2   | even                | 1+ |

**Figure S 144** HRMS spectrum of **19**. (ESI Positive)

Analysis D:\Data\Plenio\89123\_neg\_ESI\_HR\_P1-E-3\_01\_18780.d Acquisition Date 24.06.2022 13:50:22  
 Sample Name 89123\_neg\_ESI\_HR Ionisation ESI Negative  
 Method as 50-1600 1hz negative.m Mass Range 50 m/z - 1600 m/z  
 Client Popov IMesAuCl comp.w. alkyl-NH-bodipy Operator Rudolph

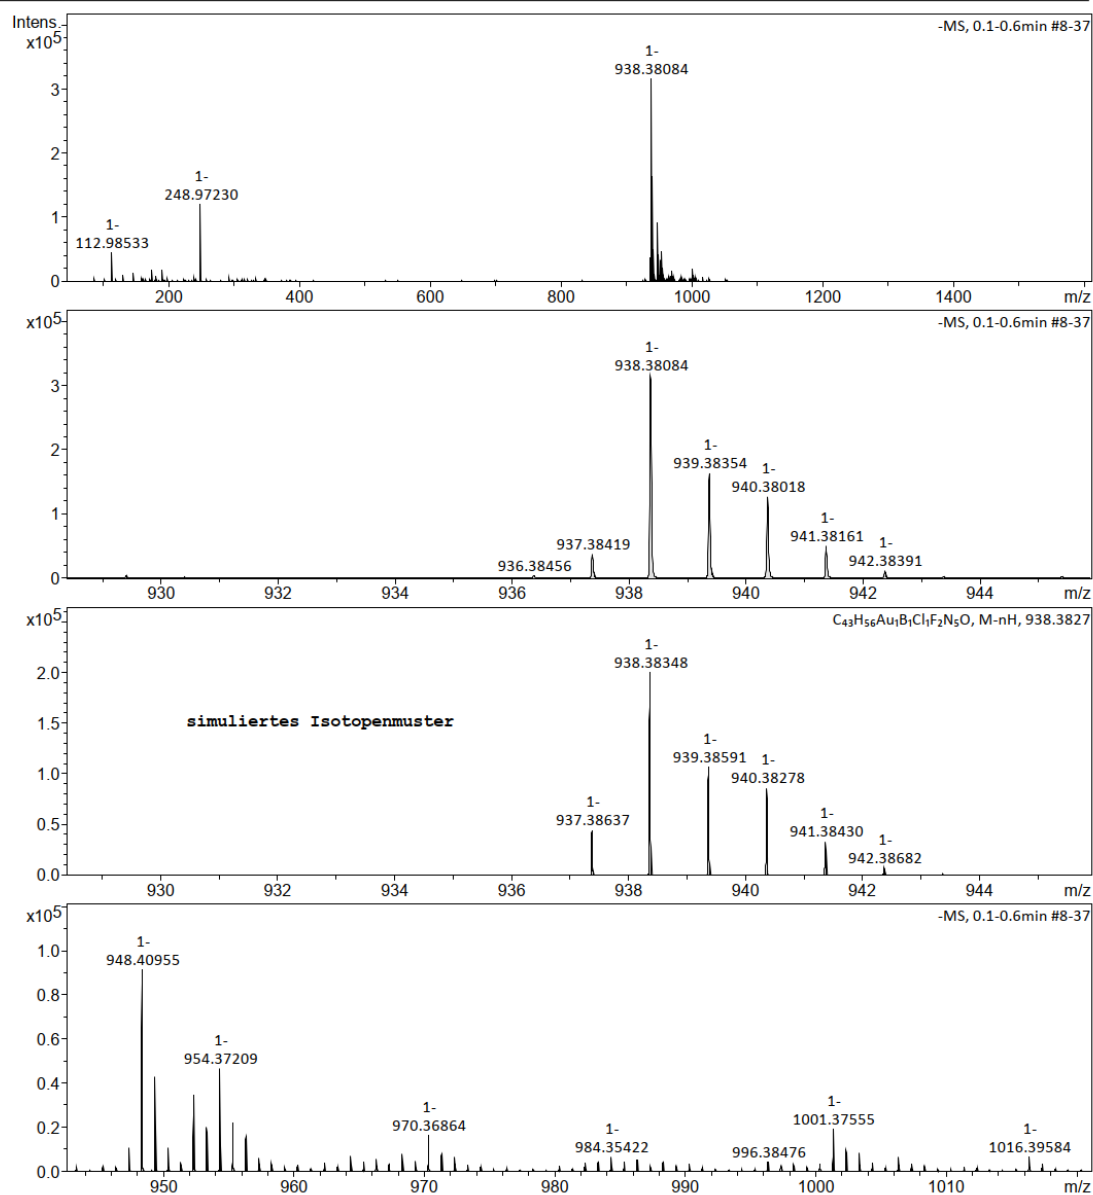

| # | Meas. m/z | m/z       | Ion Formula       | Adduct | Sum Formula       | err  [mDa] | err  [ppm] | mSigma | e <sup>-</sup> | Conf | z |
|---|-----------|-----------|-------------------|--------|-------------------|------------|------------|--------|----------------|------|---|
| 1 | 938.38084 | 938.38140 | C41H53AuBCIF2N8   | M-H    | C41H54AuBCIF2N8   | 1.27       | 1.35       | 43.6   | odd            | 1-   |   |
| 2 | 938.38084 | 938.38141 | C42H59AuBCIF2NO5  | M-H    | C42H60AuBCIF2NO5  | 1.29       | 1.38       | 44.3   | even           | 1-   |   |
| 3 | 938.38084 | 938.38006 | C40H57AuBCIF2N4O4 | M-H    | C40H58AuBCIF2N4O4 | 0.08       | 0.08       | 44.4   | odd            | 1-   |   |
| 4 | 938.38084 | 938.38274 | C43H55AuBCIF2N5O  | M-H    | C43H56AuBCIF2N5O  | 2.64       | 2.82       | 44.5   | even           | 1-   |   |
| 5 | 938.38084 | 938.37873 | C39H61AuBCIF2O8   | M-H    | C39H62AuBCIF2O8   | 1.43       | 1.52       | 46.7   | odd            | 1-   |   |

Figure S 145 HRMS spectrum of 20. (ESI Negative)

Analysis D:\Data\Plenio\89123\_ESI\_HR\_P1-E-1\_01\_18728.d  
 Sample Name 89123\_ESI\_HR  
 Method as 50-3000.m  
 Client Popov IMesAuCl comp.w. alkyl-NH-bodipy

Acquisition Date 23.06.2022 13:09:59  
 Ionisation ESI Positive  
 Mass Range 50 m/z - 3000 m/z  
 Operator Rudolph

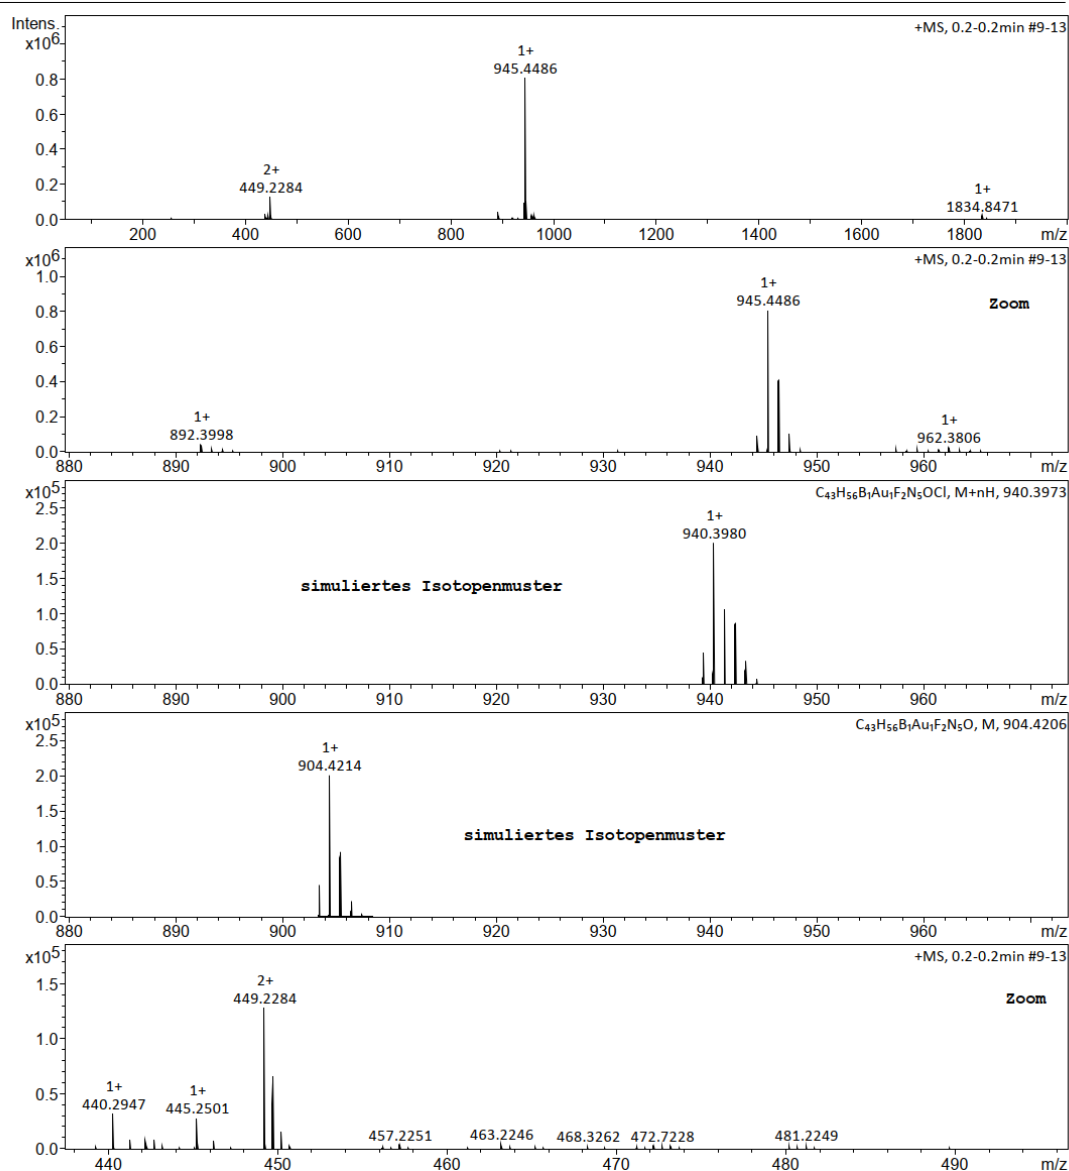

| #  | Meas. m/z | m/z      | Ion Formula     | Adduct | Sum Formula     | err  [mDa] | err  [ppm] | mSigma | e <sup>-</sup> | Conf | z |
|----|-----------|----------|-----------------|--------|-----------------|------------|------------|--------|----------------|------|---|
| 1  | 945.4486  | 945.4487 | C44H59AuFN9O    | M+H    | C44H58AuFN9O    | 0.1        | 0.1        | 5.3    | odd            | 1+   |   |
| 2  | 945.4486  | 945.4475 | C47H58AuN9      | M+H    | C47H57AuN9      | 1.0        | 1.1        | 22.6   | odd            | 1+   |   |
| 3  | 945.4486  | 945.4485 | C40H64AuF2N5O6  | M+H    | C40H63AuF2N5O6  | 0.1        | 0.1        | 24.2   | odd            | 1+   |   |
| 4  | 945.4486  | 945.4489 | C49H60AuN6O     | M+H    | C49H59AuN6O     | 0.3        | 0.3        | 29.5   | even           | 1+   |   |
| 5  | 945.4486  | 945.4485 | C47H61AuBF2N3O2 | M+H    | C47H60AuBF2N3O2 | 0.7        | 0.8        | 45.4   | odd            | 1+   |   |
| 6  | 945.4486  | 945.4496 | C55H57F2N9O4    | M+H    | C55H56F2N9O4    | 1.0        | 1.1        | 76.3   | odd            | 1+   |   |
| 7  | 945.4486  | 945.4483 | C61H58BF2N3O4   | M+H    | C61H57BF2N3O4   | 0.7        | 0.7        | 80.0   | odd            | 1+   |   |
| 8  | 945.4486  | 945.4485 | C58H56FN9O3     | M+H    | C58H55FN9O3     | 0.1        | 0.1        | 85.0   | odd            | 1+   |   |
| 9  | 945.4486  | 945.4487 | C63H57N6O3      | M+H    | C63H56N6O3      | 0.1        | 0.1        | 108.8  | even           | 1+   |   |
| 10 | 945.4486  | 945.4496 | C62H54BF2N7     | M+H    | C62H53BF2N7     | 2.1        | 2.2        | 580.1  | odd            | 1+   |   |

Figure S 146 HRMS spectrum of 20. (ESI Positive)

Analysis D:\Data\Plenio\89238\_ESI\_HR\_P1-E-1\_01\_19194.d  
 Sample Name 89238\_ESI\_HR  
 Method as 50-1000 1hz.m  
 Client Popov blue BDP\_H

Acquisition Date 18.07.2022 17:50:17  
 Ionisation ESI Positive  
 Mass Range 50 m/z - 1000 m/z  
 Operator Rudolph

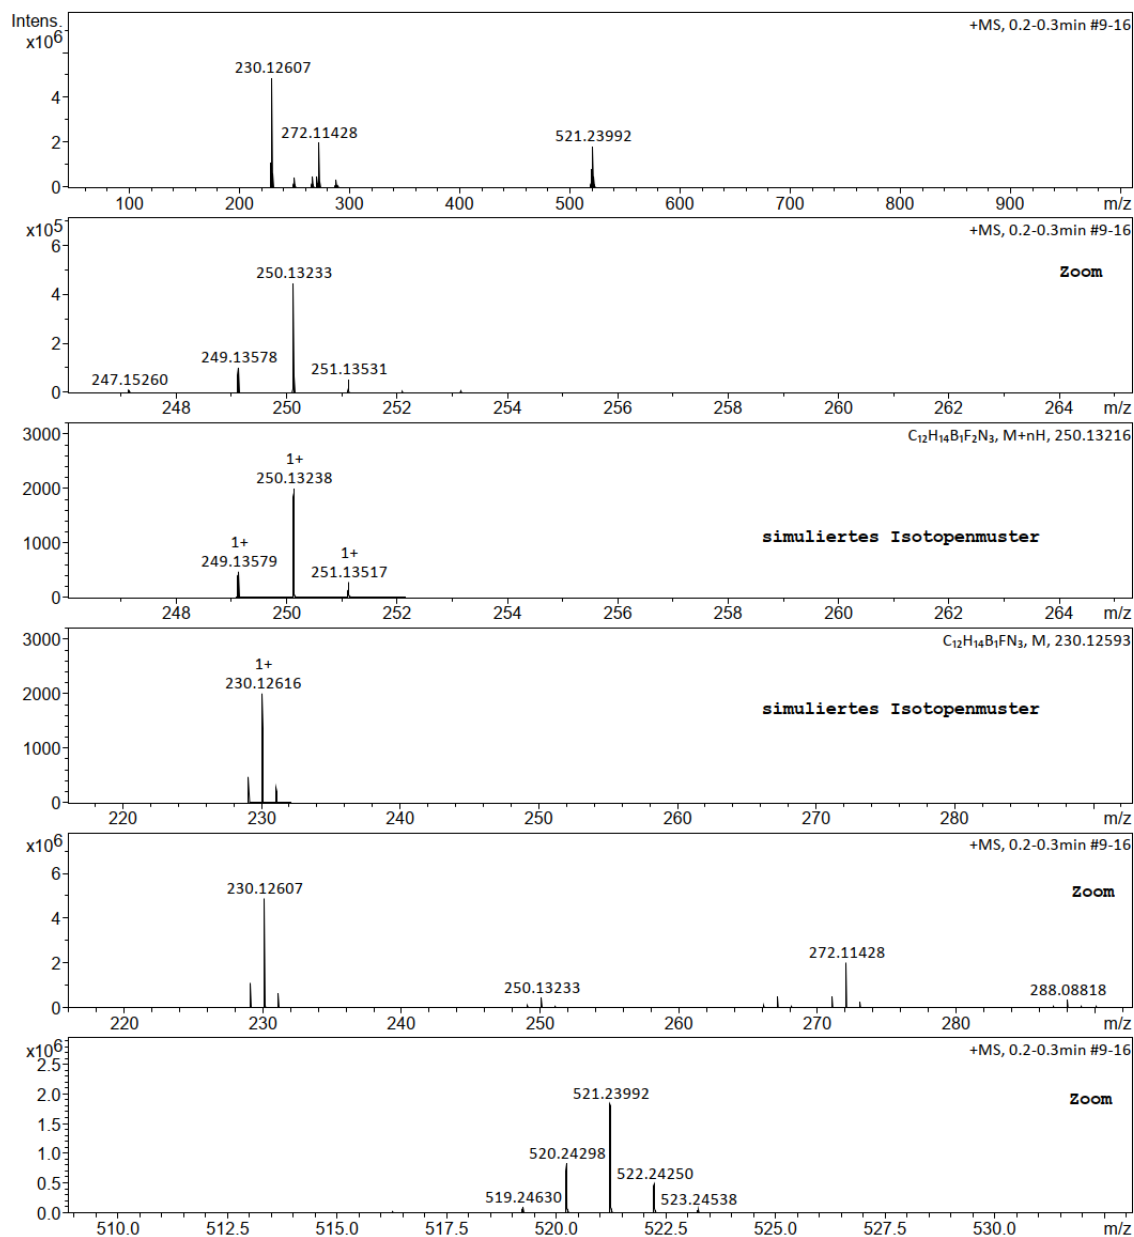

Mass Spectrometry Facility, Department of Chemistry, Technische Universität Darmstadt

Instrument: Bruker Impact II

Page 1 of 2

| # | Meas. m/z | m/z       | Ion Formula    | Adduct | Sum Formula | err  [mDa] | err  [ppm] | mSigma | e <sup>-</sup> Conf | z  |
|---|-----------|-----------|----------------|--------|-------------|------------|------------|--------|---------------------|----|
| 1 | 230.12607 | 230.12593 | C12H14BFN3     | M      | C12H14BFN3  | 0.09       | 0.37       | 7.0    | even                | 1+ |
| 1 | 250.13233 | 250.13216 | C12H15BF2N3    | M+H    | C12H14BF2N3 | 0.06       | 0.23       | 11.7   | even                | 1+ |
| 1 | 272.11428 | 272.11411 | C12H14BF2N3Na  | M+Na   | C12H14BF2N3 | 0.05       | 0.17       | 4.6    | even                | 1+ |
| 1 | 521.23992 | 521.23899 | C24H28B2F4N6Na | 2M+Na  | C12H14BF2N3 | 0.10       | 0.18       | 2.2    | even                | 1+ |

Figure S 147 HRMS spectrum of B1. (ESI Positive)

Analysis D:\Data\Plenio\89241\_ESI\_HR\_P1-E-4\_01\_19199.d  
 Sample Name 89241\_ESI\_HR  
 Method as 50-1000 1hz.m  
 Client Popov blue BDP\_2\_Me

Acquisition Date 18.07.2022 18:16:24  
 Ionisation ESI Positive  
 Mass Range 50 m/z - 1000 m/z  
 Operator Rudolph

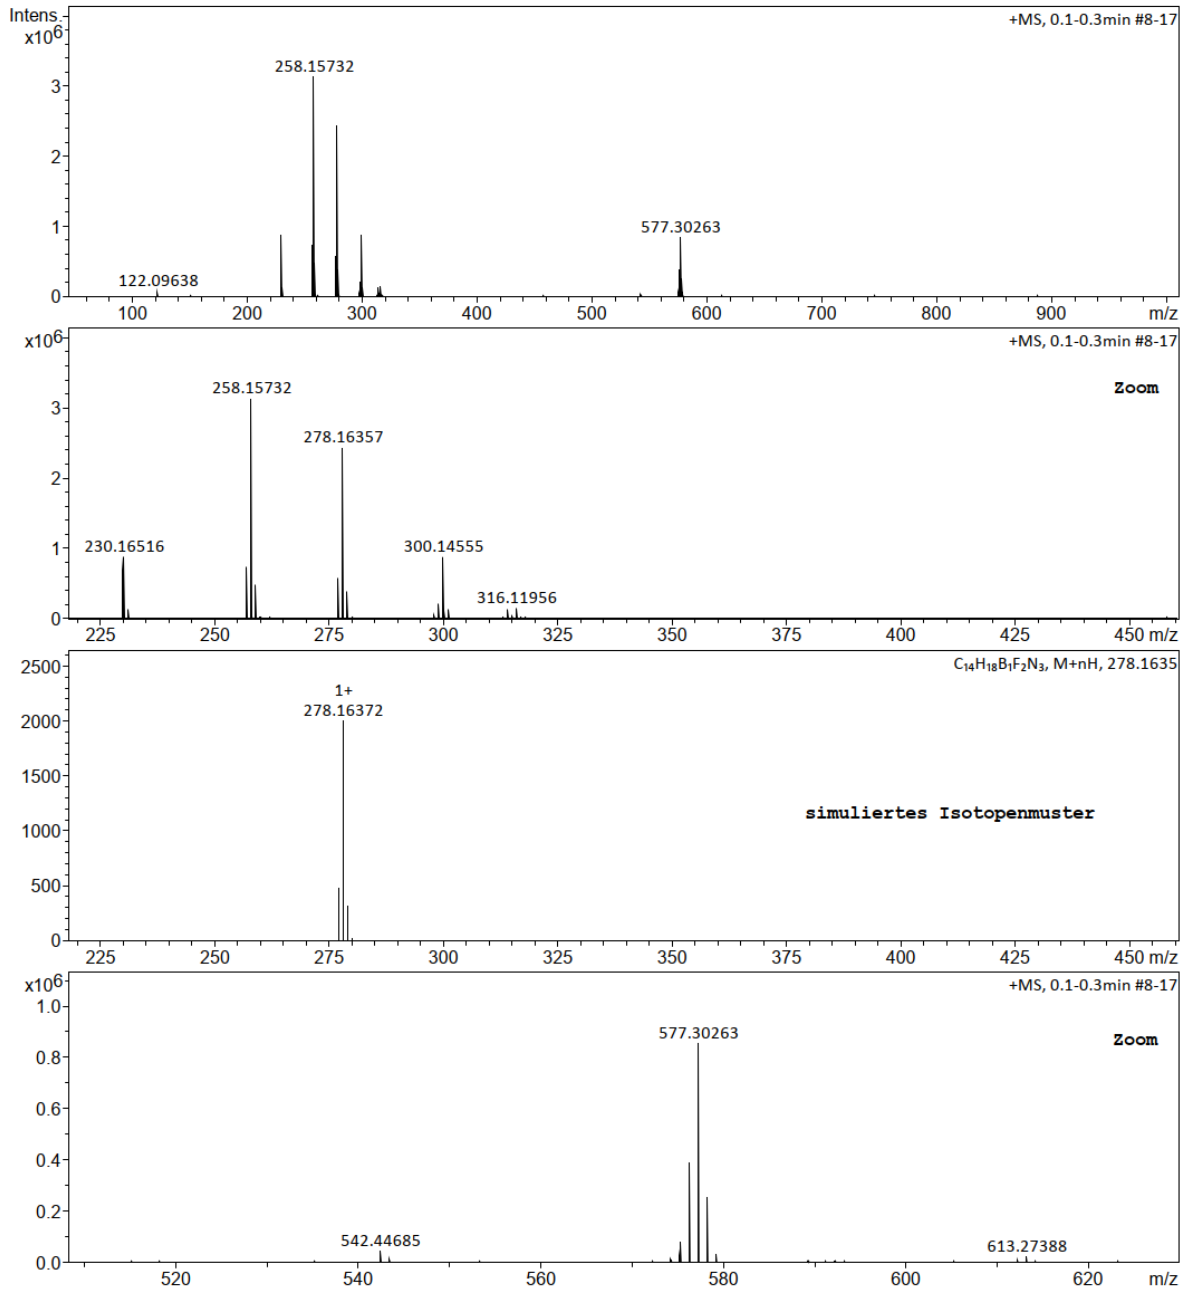

Mass Spectrometry Facility, Department of Chemistry, Technische Universität Darmstadt

Instrument: Bruker Impact II

Page 1 of 2

| # | Meas. m/z | m/z       | Ion Formula                                                                     | Adduct | Sum Formula                                                    | err  [mDa] | err  [ppm] | mSigma | e <sup>-</sup> Conf | z  |
|---|-----------|-----------|---------------------------------------------------------------------------------|--------|----------------------------------------------------------------|------------|------------|--------|---------------------|----|
| 1 | 230.16516 | 230.16517 | C <sub>14</sub> H <sub>20</sub> N <sub>3</sub>                                  | M      | C <sub>14</sub> H <sub>20</sub> N <sub>3</sub>                 | 0.02       | 0.07       | 9.8    | even                | 1+ |
| 1 | 258.15732 | 258.15723 | C <sub>14</sub> H <sub>18</sub> BFN <sub>3</sub>                                | M      | C <sub>14</sub> H <sub>18</sub> BFN <sub>3</sub>               | 0.17       | 0.65       | 3.7    | even                | 1+ |
| 1 | 278.16357 | 278.16346 | C <sub>14</sub> H <sub>19</sub> BF <sub>2</sub> N <sub>3</sub>                  | M+H    | C <sub>14</sub> H <sub>18</sub> BF <sub>2</sub> N <sub>3</sub> | 0.15       | 0.54       | 3.0    | even                | 1+ |
| 1 | 300.14555 | 300.14541 | C <sub>14</sub> H <sub>18</sub> BF <sub>2</sub> N <sub>3</sub> Na               | M+Na   | C <sub>14</sub> H <sub>18</sub> BF <sub>2</sub> N <sub>3</sub> | 0.12       | 0.39       | 7.2    | even                | 1+ |
| 1 | 577.30263 | 577.30159 | C <sub>28</sub> H <sub>36</sub> B <sub>2</sub> F <sub>4</sub> N <sub>6</sub> Na | 2M+Na  | C <sub>14</sub> H <sub>18</sub> BF <sub>2</sub> N <sub>3</sub> | 0.08       | 0.14       | 19.1   | even                | 1+ |

Figure S 148 HRMS spectrum of B2. (ESI Positive)

Analysis D:\Data\Plenio\89240\_ESI\_HR\_P1-E-3\_01\_19198.d  
 Sample Name 89240\_ESI\_HR  
 Method as 50-1000 1hz.m  
 Client Popov blue BDP\_4\_Me

Acquisition Date 18.07.2022 18:13:16  
 Ionisation ESI Positive  
 Mass Range 50 m/z - 1000 m/z  
 Operator Rudolph

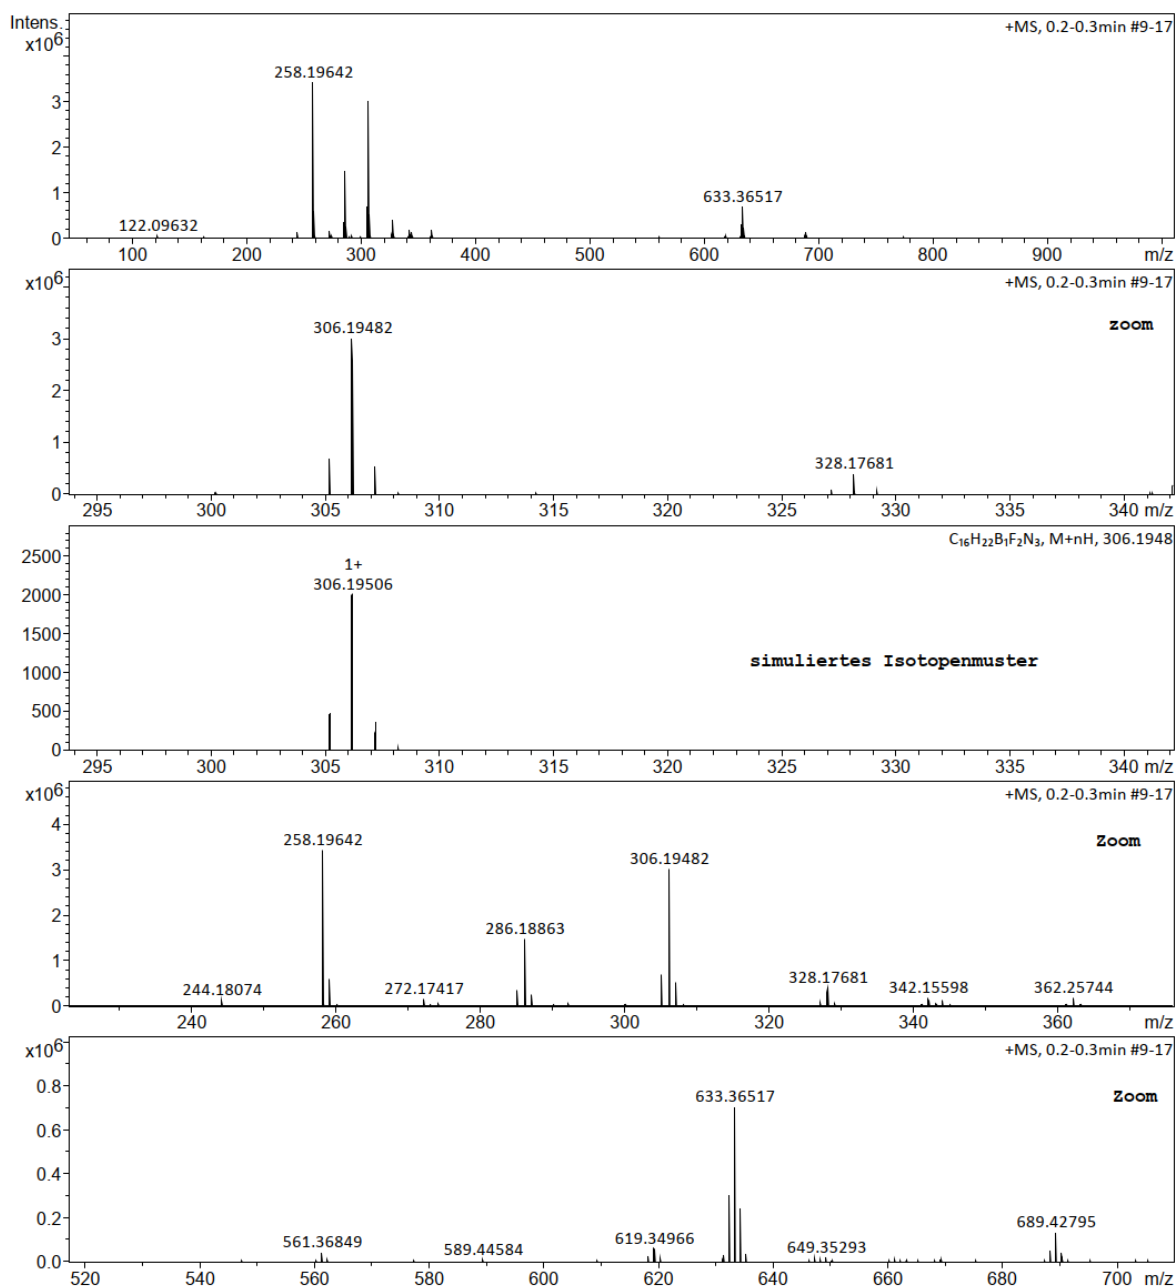

Mass Spectrometry Facility, Department of Chemistry, Technische Universität Darmstadt

Instrument: Bruker Impact II

Page 1 of 2

| # | Meas. m/z | m/z       | Ion Formula                                                                     | Adduct | Sum Formula                                                    | err  [mDa] | err  [ppm] | mSigma | e <sup>-</sup> Conf | z  |
|---|-----------|-----------|---------------------------------------------------------------------------------|--------|----------------------------------------------------------------|------------|------------|--------|---------------------|----|
| 1 | 258.19642 | 258.19647 | C <sub>16</sub> H <sub>24</sub> N <sub>3</sub>                                  | M      | C <sub>16</sub> H <sub>24</sub> N <sub>3</sub>                 | 0.06       | 0.22       | 6.3    | even                | 1+ |
| 1 | 286.18863 | 286.18853 | C <sub>16</sub> H <sub>22</sub> BFN <sub>3</sub>                                | M      | C <sub>16</sub> H <sub>22</sub> BFN <sub>3</sub>               | 0.20       | 0.70       | 5.1    | even                | 1+ |
| 1 | 306.19482 | 306.19476 | C <sub>16</sub> H <sub>23</sub> BF <sub>2</sub> N <sub>3</sub>                  | M+H    | C <sub>16</sub> H <sub>22</sub> BF <sub>2</sub> N <sub>3</sub> | 0.24       | 0.78       | 2.6    | even                | 1+ |
| 1 | 328.17681 | 328.17671 | C <sub>16</sub> H <sub>22</sub> BF <sub>2</sub> N <sub>3</sub> Na               | M+Na   | C <sub>16</sub> H <sub>22</sub> BF <sub>2</sub> N <sub>3</sub> | 0.19       | 0.59       | 9.3    | even                | 1+ |
| 1 | 633.36517 | 633.36419 | C <sub>32</sub> H <sub>44</sub> B <sub>2</sub> F <sub>4</sub> N <sub>6</sub> Na | 2M+Na  | C <sub>16</sub> H <sub>22</sub> BF <sub>2</sub> N <sub>3</sub> | 0.10       | 0.16       | 5.4    | even                | 1+ |

Figure S 149 HRMS spectrum of B3. (ESI Positive)

Analysis D:\Data\Plenio\89239\_ESI\_HR\_P1-E-2\_01\_19197.d  
 Sample Name 89239\_ESI\_HR  
 Method as 50-1000 1hz.m  
 Client Popov NH\_BDP\_(dimethylethyl)

Acquisition Date 18.07.2022 18:11:45  
 Ionisation ESI Positive  
 Mass Range 50 m/z - 1000 m/z  
 Operator Rudolph

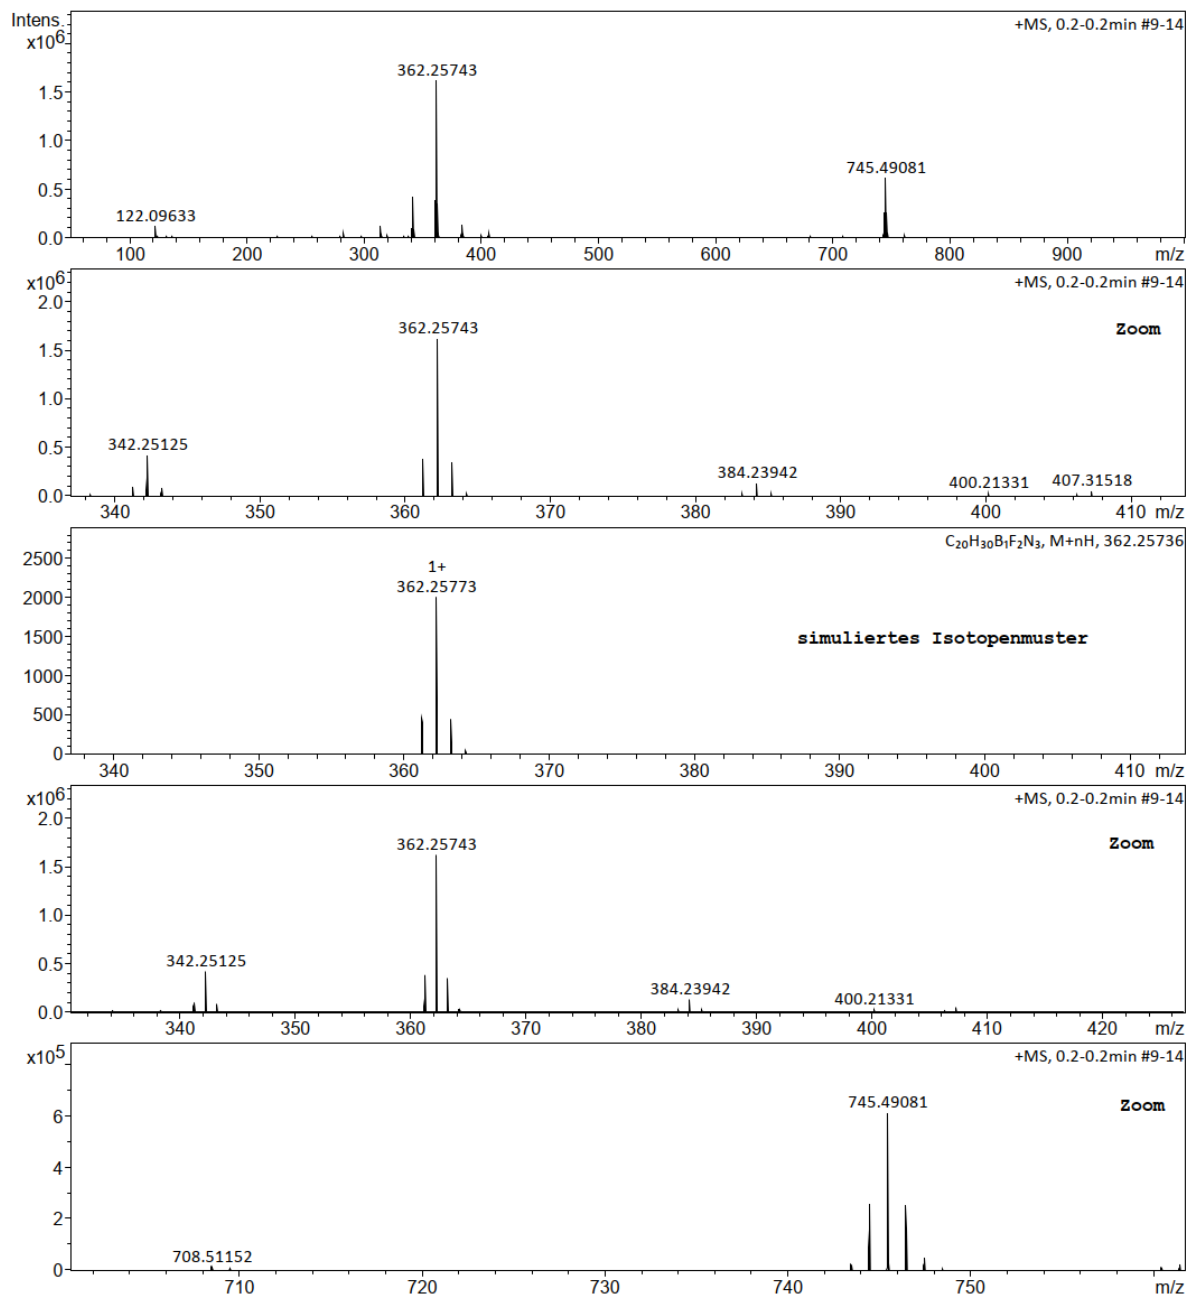

Mass Spectrometry Facility, Department of Chemistry, Technische Universität Darmstadt

Instrument: Bruker Impact II

Page 1 of 2

| # | Meas. m/z | m/z       | Ion Formula                                                                     | Adduct | Sum Formula                                                    | err  [mDa] | err  [ppm] | mSigma | e <sup>-</sup> Conf | z  |
|---|-----------|-----------|---------------------------------------------------------------------------------|--------|----------------------------------------------------------------|------------|------------|--------|---------------------|----|
| 1 | 342.25125 | 342.25113 | C <sub>20</sub> H <sub>30</sub> BFN <sub>3</sub>                                | M      | C <sub>20</sub> H <sub>30</sub> BFN <sub>3</sub>               | 0.25       | 0.72       | 8.8    | even                | 1+ |
| 1 | 362.25743 | 362.25736 | C <sub>20</sub> H <sub>31</sub> BF <sub>2</sub> N <sub>3</sub>                  | M+H    | C <sub>20</sub> H <sub>30</sub> BF <sub>2</sub> N <sub>3</sub> | 0.29       | 0.81       | 5.5    | even                | 1+ |
| 1 | 384.23942 | 384.23931 | C <sub>20</sub> H <sub>30</sub> BF <sub>2</sub> N <sub>3</sub> Na               | M+Na   | C <sub>20</sub> H <sub>30</sub> BF <sub>2</sub> N <sub>3</sub> | 0.25       | 0.64       | 20.4   | even                | 1+ |
| 1 | 745.49081 | 745.48939 | C <sub>40</sub> H <sub>60</sub> B <sub>2</sub> F <sub>4</sub> N <sub>6</sub> Na | 2M+Na  | C <sub>20</sub> H <sub>30</sub> BF <sub>2</sub> N <sub>3</sub> | 0.10       | 0.14       | 6.9    | even                | 1+ |

Figure S 150 HRMS spectrum of B4. (ESI Positive)

Analysis D:\Data\Plenio\88985\_ESI\_HR\_P1-E-4\_01\_18308.d Acquisition Date 03.06.2022 12:54:48  
 Sample Name 88985\_ESI\_HR Ionisation ESI Positive  
 Method as 50-1000 1hz.m Mass Range 50 m/z - 1000 m/z  
 Client Popov 4\_Bromo\_phenethyl\_carbamate Operator Rudolph

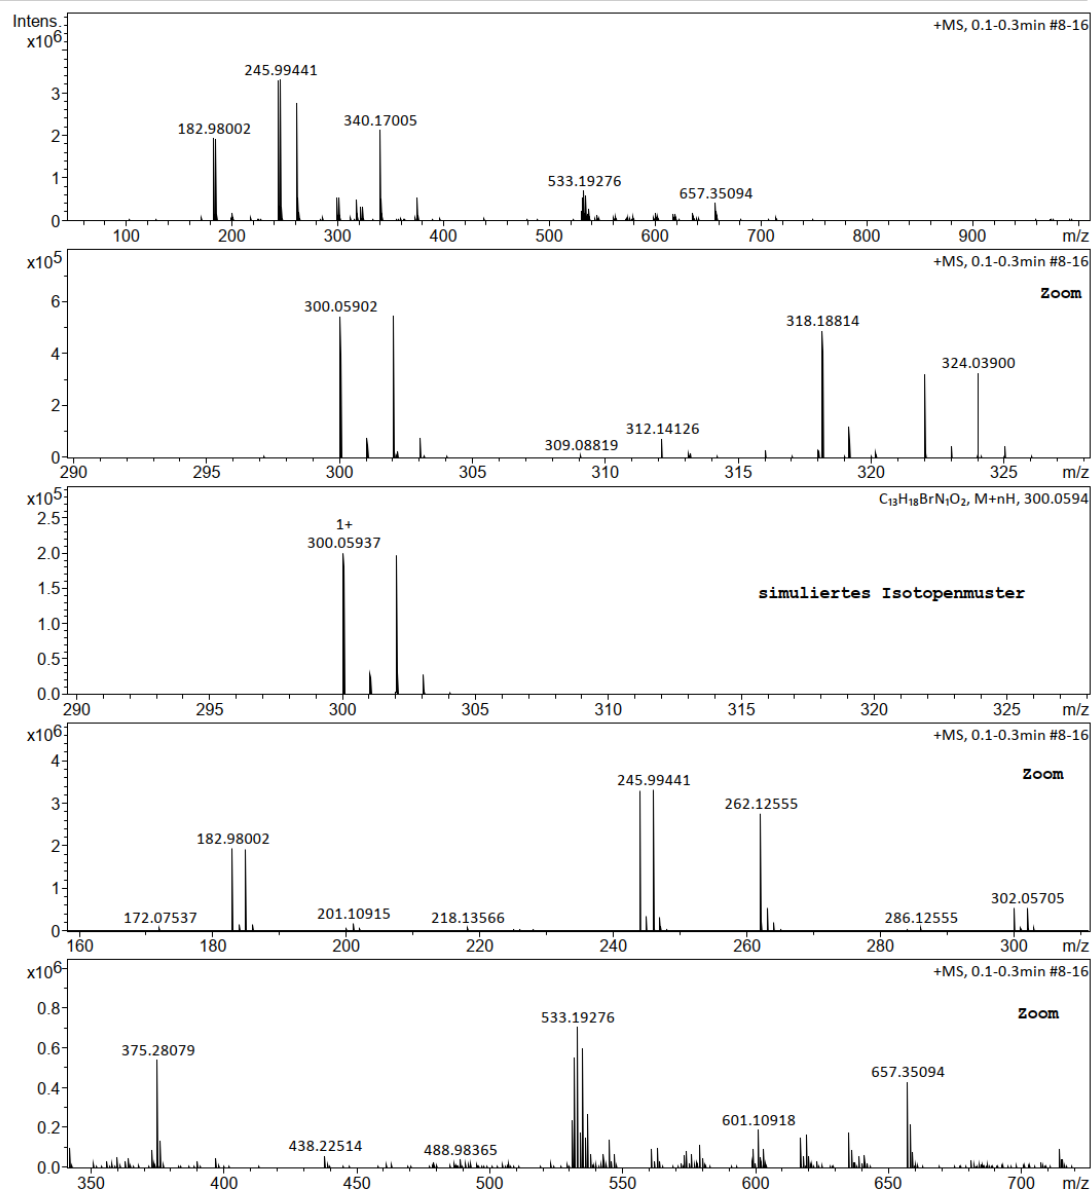

Mass Spectrometry Facility, Department of Chemistry, Technische Universität Darmstadt

Instrument: Bruker Impact II

Page 1 of 2

| # | Meas. m/z | m/z       | Ion Formula   | Adduct | Sum Formula | err  [mDa] | err  [ppm] | mSigma | e <sup>-</sup> Conf | z  |
|---|-----------|-----------|---------------|--------|-------------|------------|------------|--------|---------------------|----|
| 1 | 182.98002 | 182.98039 | C8H8Br        | M      | C8H8Br      | 0.37       | 2.02       | 1.7    | even                | 1+ |
| 1 | 243.99639 | 243.99677 | C9H11BrNO2    | M      | C9H11BrNO2  | 0.38       | 1.56       | 10.2   | even                | 1+ |
| 1 | 300.05902 | 300.05937 | C13H19BrNO2   | M+H    | C13H18BrNO2 | 0.35       | 1.16       | 7.2    | even                | 1+ |
| 1 | 322.04094 | 322.04131 | C13H18BrNNaO2 | M+Na   | C13H18BrNO2 | 0.37       | 1.16       | 10.1   | even                | 1+ |

Figure S 151 HRMS spectrum of *tert*-butyl (4-bromophenethyl)carbamate. (ESI Positive)



Analysis D:\Data\Plenio\88984\_ESI\_HR\_P1-E-2\_01\_18310.d  
 Sample Name 88984\_ESI\_HR  
 Method as 50-1000 1hz.m  
 Client Popov\_4\_TMS\_ethynyl\_phenethyl\_carbamate

Acquisition Date 03.06.2022 13:06:32  
 Ionisation ESI Positive  
 Mass Range 50 m/z - 1000 m/z  
 Operator Rudolph

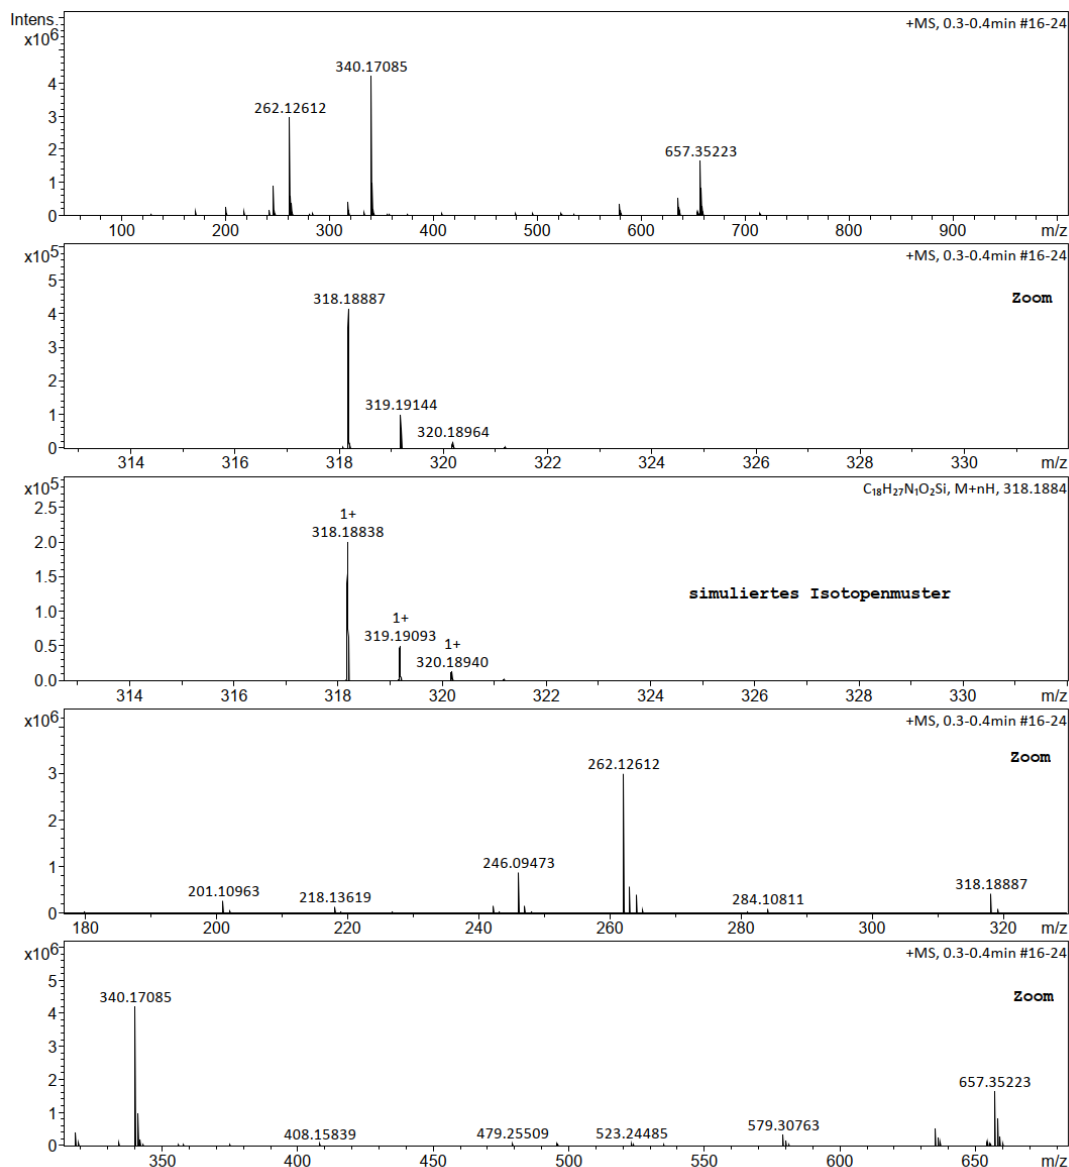

| # | Meas. m/z | m/z       | Ion Formula                                                                     | Adduct | Sum Formula                                        | err  [mDa] | err  [ppm] | mSigma | e <sup>-</sup> | Conf | z |
|---|-----------|-----------|---------------------------------------------------------------------------------|--------|----------------------------------------------------|------------|------------|--------|----------------|------|---|
| 1 | 262.12612 | 262.12578 | C <sub>14</sub> H <sub>20</sub> NO <sub>2</sub> Si                              | M      | C <sub>14</sub> H <sub>20</sub> NO <sub>2</sub> Si | 0.34       | 1.30       | 13.3   | even           | 1+   |   |
| 1 | 318.18887 | 318.18838 | C <sub>18</sub> H <sub>28</sub> NO <sub>2</sub> Si                              | M+H    | C <sub>18</sub> H <sub>27</sub> NO <sub>2</sub> Si | 0.49       | 1.53       | 13.4   | even           | 1+   |   |
| 1 | 340.17085 | 340.17033 | C <sub>18</sub> H <sub>27</sub> NNaO <sub>2</sub> Si                            | M+Na   | C <sub>18</sub> H <sub>27</sub> NO <sub>2</sub> Si | 0.52       | 1.53       | 12.9   | even           | 1+   |   |
| 1 | 657.35223 | 657.35143 | C <sub>36</sub> H <sub>54</sub> N <sub>2</sub> NaO <sub>4</sub> Si <sub>2</sub> | 2M+Na  | C <sub>18</sub> H <sub>27</sub> NO <sub>2</sub> Si | 0.80       | 1.22       | 9.1    | even           | 1+   |   |

**Figure S 152** HRMS spectrum of *tert*-butyl (4-((trimethylsilyl)ethynyl)phenethyl)carbamate. (ESI Positive)

Analysis D:\Data\Plenio\89406\_ESI\_HR\_P1-E-1\_01\_19864.d  
 Sample Name 89406\_ESI\_HR  
 Method as 50-1000 1hz.m  
 Client Popov Phenylacetylene

Acquisition Date 17.08.2022 11:33:13  
 Ionisation ESI Positive  
 Mass Range 50 m/z - 1000 m/z  
 Operator Rudolph

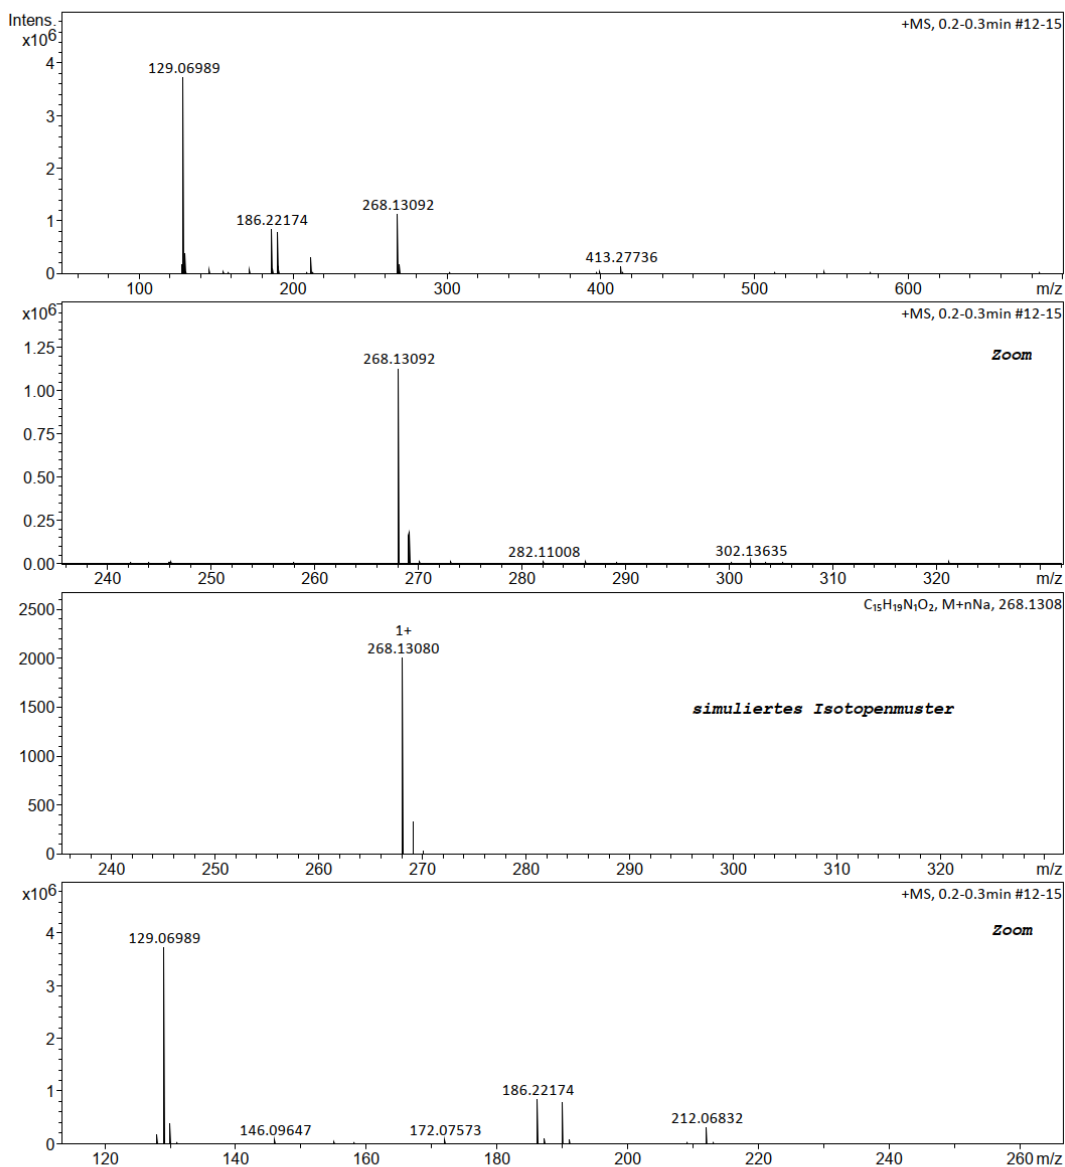

Mass Spectrometry Facility, Department of Chemistry, Technische Universität Darmstadt

Instrument: Bruker Impact II

Page 1 of 2

| # | Meas. m/z | m/z       | Ion Formula                                       | Adduct | Sum Formula                                     | err  [mDa] | err  [ppm] | mSigma | e <sup>-</sup> | Conf | z  |
|---|-----------|-----------|---------------------------------------------------|--------|-------------------------------------------------|------------|------------|--------|----------------|------|----|
| 1 | 268.13092 | 268.13080 | C <sub>15</sub> H <sub>19</sub> NNaO <sub>2</sub> | M+Na   | C <sub>15</sub> H <sub>19</sub> NO <sub>2</sub> | 0.12       | 0.45       | 4.2    | even           |      | 1+ |

Figure S 153 HRMS spectrum of *tert*-butyl (4-ethynylphenethyl)carbamate. (ESI Positive)

Analysis D:\Data\Plenio\88712\_ESI\_HR\_P1-E-3\_01\_17583.d  
 Sample Name 88712\_ESI\_HR  
 Method as 50-1600 1hz.m  
 Client Popov Blue BODipy\_acetylene

Acquisition Date 05.05.2022 15:50:14  
 Ionisation ESI Positive  
 Mass Range 50 m/z - 1600 m/z  
 Operator Rudolph

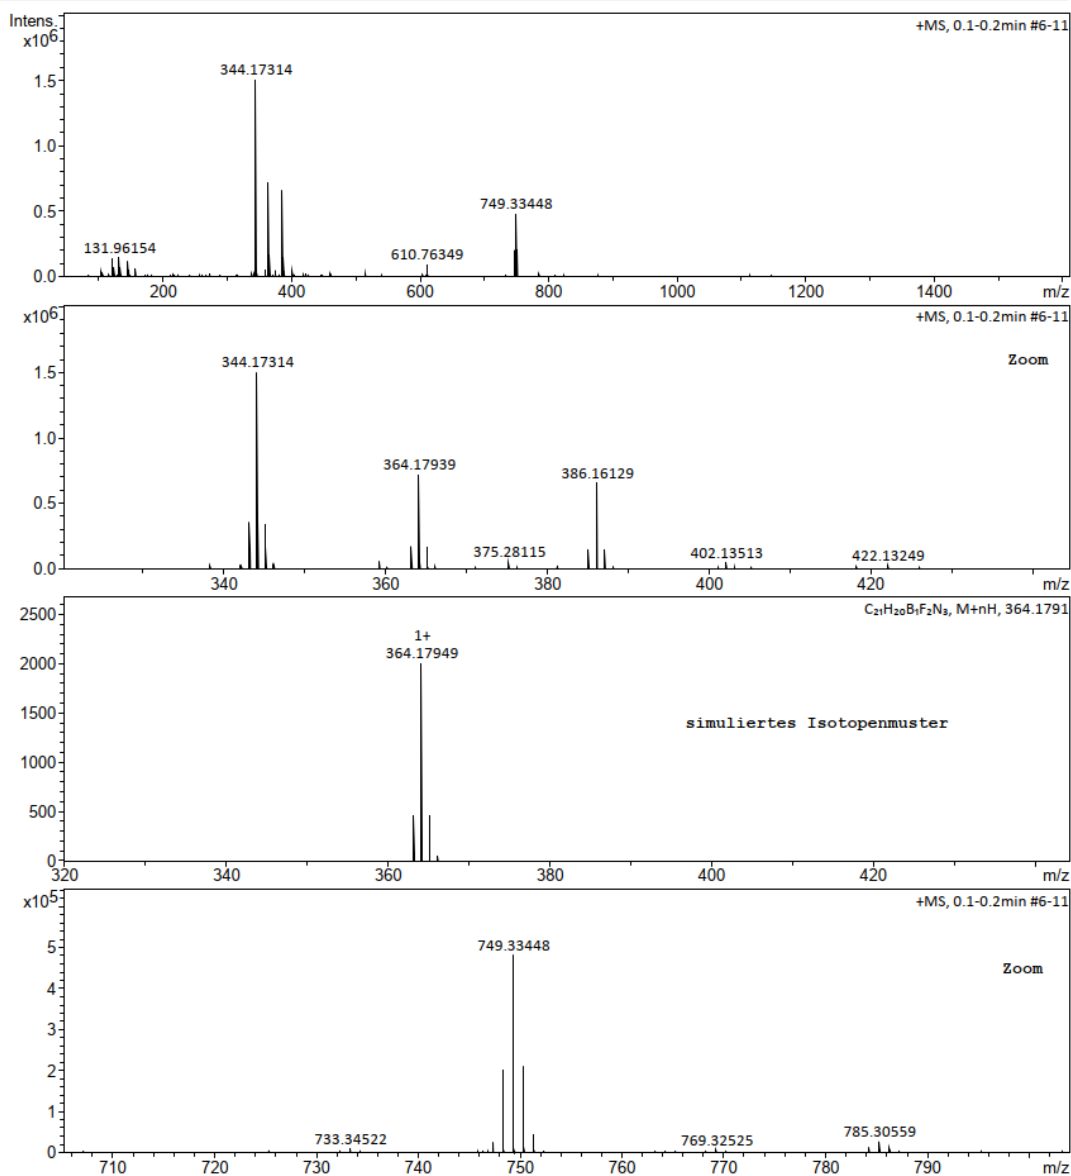

Mass Spectrometry Facility, Department of Chemistry, Technische Universität Darmstadt

Instrument: Bruker Impact II

Page 1 of 2

| # | Meas. m/z | m/z       | Ion Formula                                                                     | Adduct | Sum Formula                                                    | [err] [mDa] | [err] [ppm] | mSigma | e <sup>-</sup> | Conf | z |
|---|-----------|-----------|---------------------------------------------------------------------------------|--------|----------------------------------------------------------------|-------------|-------------|--------|----------------|------|---|
| 1 | 344.17314 | 344.17288 | C <sub>21</sub> H <sub>20</sub> BF <sub>2</sub> N <sub>3</sub>                  | M      | C <sub>21</sub> H <sub>20</sub> BF <sub>2</sub> N <sub>3</sub> | 0.12        | 0.35        | 3.9    | even           | 1+   |   |
| 1 | 364.17939 | 364.17911 | C <sub>21</sub> H <sub>21</sub> BF <sub>2</sub> N <sub>3</sub>                  | M+H    | C <sub>21</sub> H <sub>20</sub> BF <sub>2</sub> N <sub>3</sub> | 0.10        | 0.29        | 2.9    | even           | 1+   |   |
| 1 | 386.16129 | 386.16106 | C <sub>21</sub> H <sub>20</sub> BF <sub>2</sub> N <sub>3</sub> Na               | M+Na   | C <sub>21</sub> H <sub>20</sub> BF <sub>2</sub> N <sub>3</sub> | 0.14        | 0.36        | 4.2    | even           | 1+   |   |
| 1 | 749.33448 | 749.33289 | C <sub>42</sub> H <sub>40</sub> B <sub>2</sub> F <sub>4</sub> N <sub>6</sub> Na | 2M+Na  | C <sub>21</sub> H <sub>20</sub> BF <sub>2</sub> N <sub>3</sub> | 0.23        | 0.31        | 2.4    | even           | 1+   |   |

## Accurate Mass Measurement

Figure S 154 HRMS spectrum of **21**. (ESI Positive)

Analysis D:\Data\Plenio\89121\_ESI\_HR\_P1-E-2\_01\_18733.d  
 Sample Name 89121\_ESI\_HR  
 Method as 50-3000.m  
 Client Popov blue-green acetylide

Acquisition Date 23.06.2022 13:46:34  
 Ionisation ESI Positive  
 Mass Range 50 m/z - 3000 m/z  
 Operator Rudolph

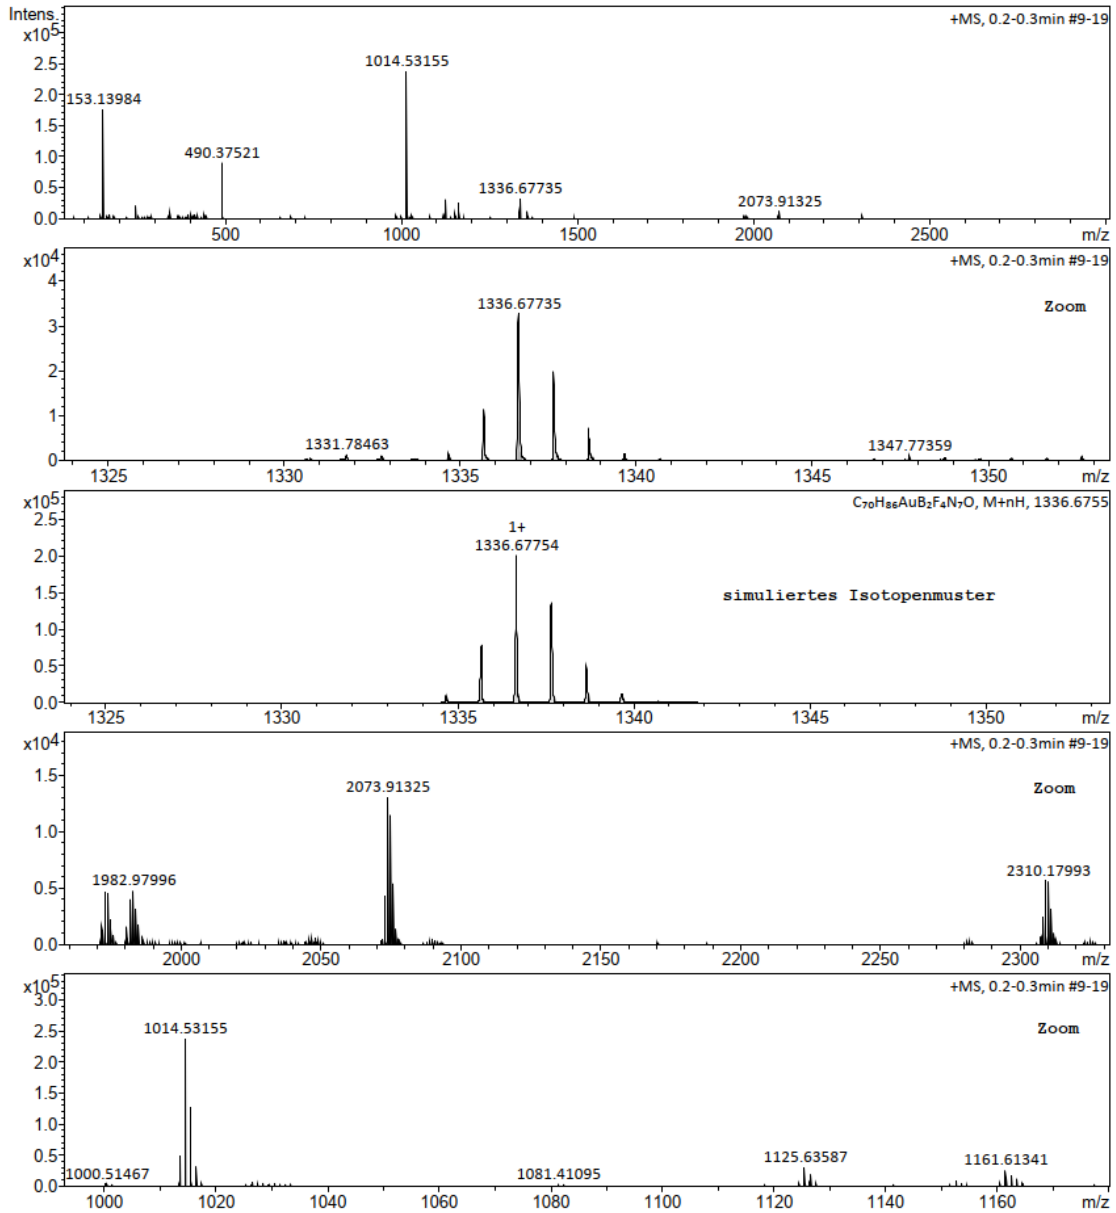

| # | Meas. m/z  | m/z        | Ion Formula                                                                                   | Adduct | Sum Formula                                                                                   | err  [mDa] | err  [ppm] | mSigma | e <sup>-</sup> | Conf | z |
|---|------------|------------|-----------------------------------------------------------------------------------------------|--------|-----------------------------------------------------------------------------------------------|------------|------------|--------|----------------|------|---|
| 1 | 1336.67735 | 1336.67730 | C <sub>58</sub> H <sub>91</sub> AuB <sub>2</sub> F <sub>4</sub> N <sub>9</sub> O <sub>8</sub> | M+H    | C <sub>58</sub> H <sub>90</sub> AuB <sub>2</sub> F <sub>4</sub> N <sub>9</sub> O <sub>8</sub> | 1.77       | 1.32       | 24.6   | even           | 1+   |   |
| 2 | 1336.67735 | 1336.67545 | C <sub>70</sub> H <sub>87</sub> AuB <sub>2</sub> F <sub>4</sub> N <sub>7</sub> O              | M+H    | C <sub>70</sub> H <sub>86</sub> AuB <sub>2</sub> F <sub>4</sub> N <sub>7</sub> O              | 0.19       | 0.14       | 30.4   | even           | 1+   |   |

Figure S 155 HRMS spectrum of 22-dbu. (ESI Positive)

Analysis D:\Data\Plenio\89121\_neg\_ESI\_HR\_P1-E-2\_01\_18781.d  
 Sample Name 89121\_neg\_ESI\_HR  
 Method as 50-1600 1hz negative.m  
 Client Popov blue-green acetylide

Acquisition Date 24.06.2022 14:01:29  
 Ionisation ESI Negative  
 Mass Range 50 m/z - 1600 m/z  
 Operator Rudolph

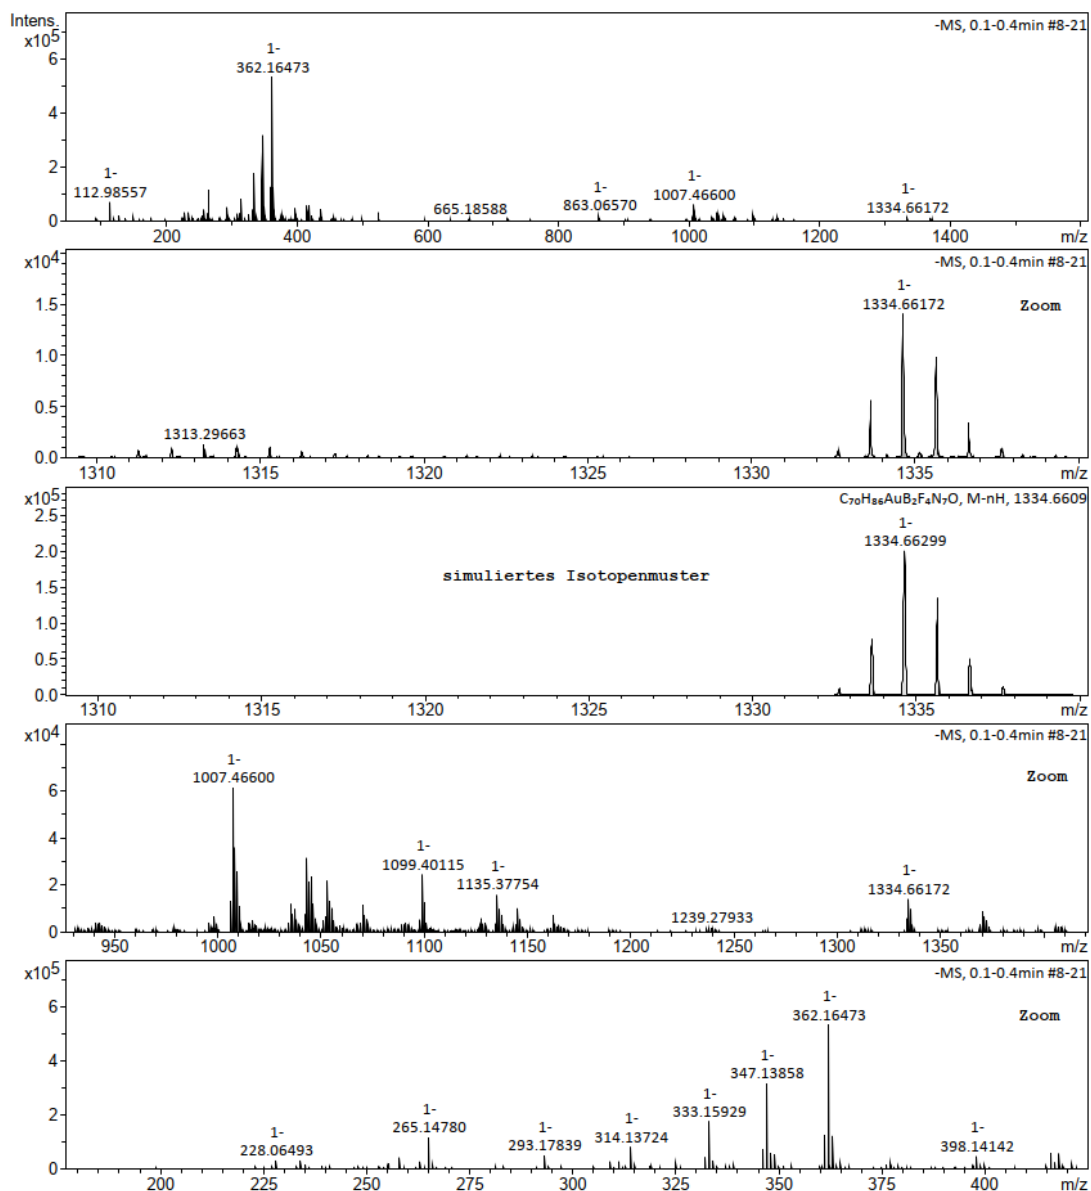

| # | Meas. m/z  | m/z        | Ion Formula      | Adduct | Sum Formula      | err  [mDa] | err  [ppm] | mSigma | e <sup>-</sup> | Conf | z |
|---|------------|------------|------------------|--------|------------------|------------|------------|--------|----------------|------|---|
| 1 | 1334.66172 | 1334.66090 | C70H85AuB2F4N7O  | M-H    | C70H86AuB2F4N7O  | 1.26       | 0.95       | 13.5   | even           | 1-   |   |
| 2 | 1334.66172 | 1334.65688 | C65H85AuB2F4N9O3 | M-H    | C65H86AuB2F4N9O3 | 2.87       | 2.15       | 24.4   | even           | 1-   |   |

Figure S 141 HRMS spectrum of 22-dbu. (ESI Negative)



- [1] T. Kowada, S. Yamaguchi and K. Ohe, *Org. Lett.* **2010**, *12*, 296–299.
- [2] S. Popov, H. Plenio, *Eur. J. Inorg. Chem.* **2021**, *22*, 3708-3718.
- [3] P. Irmeler, F. Gogesch, A. Mang, M. Bodensteiner, C. Larsen, O. Wenger and R. Winter, *Dalton Trans.*, **2019**, *48*, 11690-11705.
- [4] T. Goud, A. Tutar, J-F. Biellmann, *Tetrahedron*, **2006**, *62*, 5084-5091.
- [5] O. Halter, H. Plenio, *Chem. Commun.* **2017**, *53*, 12461-12464.
